# Supplementary material for: TRF1 averts chromatin remodelling, recombination and replication dependent-break induced replication at mouse telomeres
Source: eLife. 2020 Jan 14;9:e49817. doi: 10.7554/eLife.49817 (PMC6986873; doi:10.7554/eLife.49817)
Supplement: Figure 1—source data 2. — Related to Figure 1D. [file elife-49817-fig1-data2.xlsx]

## Sheet: Figure 1D
LFQ intensity 007_Deletion_01	LFQ intensity 007_Deletion_02	LFQ intensity 007_Scramble_01	LFQ intensity 007_Scramble_02	LFQ intensity 007_Telomere_01	LFQ intensity 007_Telomere_02	t-test Significant log2 fold change [Telomere right / Deletion left]	Score	Intensity	Q-value	-Log t-test p value log2 fold change [Telomere right / Deletion left]	t-test Difference log2 fold change [Telomere right / Deletion left]	Protein IDs	Majority protein IDs	Protein names	Gene names
#!{Type}E	E	E	E	E	E	C	N	N	N	N	N	T	T	T	T
#!{C:Group1}Deletion	Deletion	Scramble	Scramble	Telomere	Telomere
18.2444	17.7769	17.3314	16.7357	17.3323	17.996		1.5818	20.2658	0.0032103	0.315869	-0.346515	G3UZW7;A0A023T778;Q9CQL1;P61327	G3UZW7;A0A023T778;Q9CQL1;P61327	Protein mago nashi homolog 2;Protein mago nashi homolog	Magohb;Magoh
19.0816	19.0051	17.6993	17.1253	17.7068	16.6277	+	19.191	17.8088	0	1.13066	-1.87608	A0A087WNZ7;G5E870;A0A087WS65;Q3TP48;A0A087WQ02;A0A087WP92;A0A087WRV6;A0A0B4J1N9	A0A087WNZ7;G5E870;A0A087WS65;Q3TP48;A0A087WQ02;A0A087WP92;A0A087WRV6;A0A0B4J1N9	E3 ubiquitin-protein ligase TRIP12	Trip12
17.9732	18.1414	17.0998	16.4905	17.0966	17.0268	+	1.4597	15.8917	0.0031128	2.083	-0.995599	A0A087WPZ6;A0A087WP41;Q9D6L8	A0A087WPZ6;A0A087WP41;Q9D6L8	Peptidyl-prolyl cis-trans isomerase;Peptidyl-prolyl cis-trans isomerase-like 3	Ppil3
20.7807	20.3988	20.0626	20.0125	20.4784	20.3869		44.704	21.9771	0	0.294533	-0.157104	A0A087WPL5;E9QNN1;O70133;Q3UR42;A0A0R4J2C3;A0A087WRT3	A0A087WPL5;E9QNN1;O70133;Q3UR42	ATP-dependent RNA helicase A	Dhx9
21.2367	22.0197	25.6655	25.6182	25.0367	25.3809	+	323.31	27.1024	0	1.85485	3.58053	A0A087WQQ5;F8VQC7;A0A087WS29;A0A087WNW3;A0A087WQI3;A0A087WQ25;A0A087WP85;A0A087WRS1;A0A087WP14;A0A087WPX0;Q61595;A0A087WQF8;A0A087WP48;A0A087WS04;A0A087WQG4;A0A087WQD0;A0A087WPW5;A0A087WS23;A0A087WR91;A0A087WPY8	A0A087WQQ5;F8VQC7;A0A087WS29;A0A087WNW3;A0A087WQI3;A0A087WQ25;A0A087WP85;A0A087WRS1;A0A087WP14;A0A087WPX0;Q61595;A0A087WQF8;A0A087WP48;A0A087WS04;A0A087WQG4;A0A087WQD0;A0A087WPW5;A0A087WS23	Kinectin	Ktn1
18.5876	17.5476	19.7496	19.3565	19.2959	19.4189		1.8449	21.0191	0.00084388	0.876919	1.28984	A0A087WQS2;Q9CQC6;A0A087WPF9;A0A087WS48	A0A087WQS2;Q9CQC6;A0A087WPF9	Basic leucine zipper and W2 domain-containing protein 1	Bzw1
23.9344	23.5368	27.6496	27.4738	26.3263	26.4044	+	323.31	28.8305	0	2.23036	2.62972	A0A087WR50;P11276;Q3UHL6;A0A087WS56;A0A087WS99;Q4KL80;A0A087WSU6	A0A087WR50;P11276;Q3UHL6;A0A087WS56	Fibronectin;Anastellin	Fn1
20.685	21.0152	20.7207	20.7491	20.7999	20.9259		138.32	22.4424	0	0.0227798	0.0127869	A0A087WR97;Q921F2;A0A087WRP4;H3BJV1;A0A087WSH7;A0A087WQA5;A0A087WRZ5;Q8R0B4;Q8BLD4;Q6VYI5;Q6VYI4;A0A087WQX8;A0A087WNY6;A0A087WSC6;A0A087WS74	A0A087WR97;Q921F2;A0A087WRP4;H3BJV1;A0A087WSH7;A0A087WQA5;A0A087WRZ5;Q8R0B4;Q8BLD4;Q6VYI5;Q6VYI4	TAR DNA-binding protein 43	Tardbp
18.0284	18.4263	17.9869	17.4298	17.9995	16.7392		2.1804	18.3065	0	0.489838	-0.857944	Q05DJ9;A0A087WRC0;Q64514	Q05DJ9;A0A087WRC0;Q64514	Tripeptidyl-peptidase 2	Tpp2
18.8558	18.3026	16.3848	15.7333	16.3687	16.3765	+	1.1792	18.8319	0.0094821	1.81366	-2.20658	A0A087WRY3;Q80XU3	A0A087WRY3;Q80XU3	Nuclear ubiquitous casein and cyclin-dependent kinase substrate 1	Nucks1
17.3614	16.8392	17.049	16.4367	16.0351	17.3388		1.9509	17.9855	0	0.210635	-0.413369	A0A087WSK7;Q9CQZ0;Q921I0	A0A087WSK7;Q9CQZ0;Q921I0	ORM1-like protein 2;ORM1-like protein 1	Gm28778;Ormdl2;Ormdl1
17.981	17.4972	18.0154	18.5305	17.0448	17.996		3.7751	19.6003	0	0.141688	-0.218689	S4R294;S4R2J9;A0A0A0MQ79;Q3TLH4;S4R2L9;S4R209	S4R294;S4R2J9;A0A0A0MQ79;Q3TLH4;S4R2L9;S4R209	Protein PRRC2C	Prrc2c
18.9204	18.4949	19.4786	17.5031	18.07	15.6008		1.343	19.9268	0.0045697	0.56277	-1.87225	A0A0A0MQA5;P68368;A0A087WRB4;A0A087WQS4;Q3UX10;A0A087WSB0;A0A087WSL5	A0A0A0MQA5;P68368	Tubulin alpha-4A chain	Tuba4a
27.8656	27.8525	26.3611	26.3928	26.6846	26.7163	+	152.22	28.9133	0	3.65839	-1.15861	A0A0A0MQF6;P16858;S4R257;A0A1D5RLD8;V9GXA7	A0A0A0MQF6;P16858;S4R257;A0A1D5RLD8	Glyceraldehyde-3-phosphate dehydrogenase	Gapdh
16.6032	16.034	18.0561	14.8726	18.5975	16.3213		42.958	20.1903	0	0.363118	1.14085	A0A0A0MQG2;Q62261	A0A0A0MQG2;Q62261	Spectrin beta chain, non-erythrocytic 1	Sptbn1
19.7522	17.5072	15.5719	16.4474	15.5413	17.4139		1.9257	18.0665	0	0.554699	-2.15212	A0A0A0MQG8;Q1H9T6	A0A0A0MQG8;Q1H9T6	Zinc finger and BTB domain-containing protein 48	Zbtb48
22.6878	23.2677	21.6488	22.0447	21.8378	21.9324		11.41	24.6092	0	1.18505	-1.09262	A0A0A0MQM0;P63242;Q8BGY2;J3QPS8	A0A0A0MQM0;P63242;Q8BGY2	Eukaryotic translation initiation factor 5A;Eukaryotic translation initiation factor 5A-1;Eukaryotic translation initiation factor 5A-2	Eif5a;Eif5a2
17.9904	17.3872	17.0591	19.0144	17.0552	14.7189		53.528	19.2396	0	0.562437	-1.8018	A0A0A0MQN1;Q5RL79	A0A0A0MQN1;Q5RL79	Keratinocyte-associated protein 2	Krtcap2
17.8774	17.6683	19.6274	19.7999	16.9318	16.3323		4.4047	20.7923	0	1.15818	-1.14078	A0A0A6YW80;G3X8Y3;Q80UM3;A0A0A6YX86	A0A0A6YW80;G3X8Y3;Q80UM3	N-alpha-acetyltransferase 15, NatA auxiliary subunit	Naa15
18.1421	17.8599	16.938	16.3191	20.5234	16.2009		1.1615	20.1892	0.0094752	0.0540953	0.361206	A0A0A6YWB3;Q3TFK5	A0A0A6YWB3;Q3TFK5	G patch domain-containing protein 4	Gpatch4
20.1588	20.2741	22.2056	21.5835	21.4769	22.2624	+	47.249	24.3659	0	1.27482	1.6532	A0A0A6YX26;P62900;A0A0A6YXL3	A0A0A6YX26;P62900;A0A0A6YXL3	60S ribosomal protein L31	Rpl31
18.3224	16.4624	17.2217	18.0392	17.2206	16.5087		1.3022	18.7111	0.0060241	0.187707	-0.52777	A0A0A6YY72;P24547	A0A0A6YY72;P24547	Inosine-5-monophosphate dehydrogenase 2	Impdh2
17.0066	17.7919	19.6413	16.6196	17.4175	16.7185		32.213	21.6594	0	0.226966	-0.331278	A0A0G2JED9;A0A0G2JDL9;A0A0G2JE52;Q99JI6;P62835	A0A0G2JED9;A0A0G2JDL9;A0A0G2JE52;Q99JI6;P62835	Ras-related protein Rap-1b;Ras-related protein Rap-1A	Rap1b;Rap1a
18.2585	17.2398	19.3217	16.8243	15.9815	20.0583		19.768	20.3522	0	0.0413122	0.270737	A0A0H2UH17;A0A0G2JDV6;Q80X50;A0A0G2JFN7	A0A0H2UH17;A0A0G2JDV6;Q80X50	Ubiquitin-associated protein 2-like	Ubap2l
20.4114	17.0363	20.3427	20.2831	17.3477	20.5478		67.682	22.0672	0	0.0305461	0.223886	A0A0G2JDV8;Q9DAW9;A0A0G2JFI6;A0A0G2JFC8;A0A0G2JFG3	A0A0G2JDV8;Q9DAW9;A0A0G2JFI6	Calponin-3	Cnn3
19.5347	19.7294	21.1556	20.592	21.0356	21.3547	+	2.531	23.3803	0	1.85404	1.56306	A0A0G2JDW7;Q6ZWU9;A0A0G2JG29;A0A0G2JEX7	A0A0G2JDW7;Q6ZWU9;A0A0G2JG29	40S ribosomal protein S27	Rps27
17.7386	18.1804	17.4151	18.3691	16.7804	17.9458		1.2954	19.932	0.006015	0.357039	-0.596445	A0A0G2JE32;A0A0G2JGL0;P61079;A0A0G2JF40;Q05CK8;A0A0G2JGZ3;Q6ZWY6;P62838	A0A0G2JE32;A0A0G2JGL0;P61079;A0A0G2JF40;Q05CK8;A0A0G2JGZ3;Q6ZWY6;P62838	Ubiquitin-conjugating enzyme E2 D3;Ubiquitin-conjugating enzyme E2 D2B;Ubiquitin-conjugating enzyme E2 D2	Ube2d3;Ube2d2b;Ube2d2
17.547	17.6694	16.0044	20.4493	20.1514	20.4384	+	7.5969	21.4334	0	2.47437	2.68669	A0A0G2JEP0;Q61584;A0A0G2JGH0;A0A0G2JGL6;A0A0H2UH27	A0A0G2JEP0;Q61584	Fragile X mental retardation syndrome-related protein 1	Fxr1
18.6243	16.3983	17.3465	15.3306	16.5712	16.0404		1.5581	18.298	0.0031898	0.395153	-1.20549	A0A0G2JGI2;A0A0G2JEV2;O35216	A0A0G2JGI2;A0A0G2JEV2;O35216	Histone H3-like centromeric protein A	Cenpa
18.1431	17.4822	20.2253	20.2096	19.6414	19.9448	+	291.95	21.4651	0	1.49353	1.98046	A0A0G2JF72;Q8JZN2;Q91W50	A0A0G2JF72;Q8JZN2;Q91W50	Cold shock domain-containing protein E1	Csde1
16.9462	17.4792	20.367	20.3534	20.2593	20.2278	+	4.4991	21.8996	0	2.11534	3.03082	A0A140T8T5;A0A0G2JFH2;P27546;A0A0G2JFT4;A0A0G2JG35;A0A0G2JDN7;E9PZ43;A0A0G2JFK3;A0A0G2JDY5	A0A140T8T5;A0A0G2JFH2;P27546;A0A0G2JFT4;A0A0G2JG35;A0A0G2JDN7;E9PZ43	Microtubule-associated protein 4;Microtubule-associated protein	Map4
22.1124	22.0096	19.663	19.8962	20.3891	20.8116	+	25.266	23.2714	0	1.66871	-1.46066	A0A0G2JGD2;P07091	A0A0G2JGD2;P07091	Protein S100-A4	S100a4
17.9668	17.5488	16.7892	16.9733	17.7469	15.1881		29.146	17.5433	0	0.372187	-1.29033	A0A0G2JGE0;Q8BXV2	A0A0G2JGE0;Q8BXV2	BRI3-binding protein	Bri3bp
17.964	18.043	19.6812	19.8435	19.7347	19.6625	+	10.07	21.688	0	3.00204	1.69516	A0A0G2JH04;P63073;A0A0G2JG98;A0A0G2JFB4;A0A0G2JGT5	A0A0G2JH04;P63073;A0A0G2JG98;A0A0G2JFB4;A0A0G2JGT5	Eukaryotic translation initiation factor 4E	Eif4e
19.2269	19.3626	16.5837	16.7517	17.2218	16.6441	+	2.2643	17.8076	0	1.81191	-2.36184	E9Q5A3;Z4YJZ7;A0A0H2UH19;Q5DW34;A0A0A6YWA0	E9Q5A3;Z4YJZ7;A0A0H2UH19;Q5DW34;A0A0A6YWA0	Histone-lysine N-methyltransferase EHMT1	Ehmt1
20.2337	18.1557	17.7386	16.1616	15.9156	16.0395	+	28.803	19.6066	0	1.04254	-3.21713	Q3U6F1;E9Q7W0;A0A0J9YTV5;P31266	Q3U6F1;E9Q7W0;A0A0J9YTV5;P31266	Recombining binding protein suppressor of hairless	Rbpj
18.0296	20.2802	21.9275	21.6746	17.0294	21.7972		13.899	23.3479	0	0.031113	0.258357	A0A0J9YTY0;A0A0J9YUL3;Q8C1B7	A0A0J9YTY0;A0A0J9YUL3;Q8C1B7	Septin-11	2011-09-01
18.4949	18.453	17.2228	15.944	17.0263	16.7247	+	1.7317	17.5815	0.00082919	2.04812	-1.59844	E9Q880;B9EJ54;A0A0J9YUD5	E9Q880;B9EJ54;A0A0J9YUD5		Nup205
18.601	17.9849	22.9205	22.6634	22.6828	22.7486	+	179.16	24.3244	0	2.31243	4.42273	A0A0J9YUS5;E9PVC6;E9Q9E1;Q6NZJ6;A0A0J9YVC1;A0A0J9YUC1	A0A0J9YUS5;E9PVC6;E9Q9E1;Q6NZJ6	Eukaryotic translation initiation factor 4 gamma 1	Eif4g1
18.881	18.4323	15.9397	17.4284	17.0979	15.8166	+	9.345	18.5851	0	1.07834	-2.19939	A0A0J9YUT8;Q8R3C6	A0A0J9YUT8;Q8R3C6	Probable RNA-binding protein 19	Rbm19
25.946	26.0892	24.6468	24.4088	24.9917	24.8072	+	152.71	26.8926	0	1.96939	-1.11813	A0A0J9YUZ4;P63158;A0A0J9YUD8;D3YZ18;D3YVC6	A0A0J9YUZ4;P63158;A0A0J9YUD8;D3YZ18;D3YVC6	High mobility group protein B1	Hmgb1
20.3656	20.1652	17.0338	17.167	17.6056	17.0695	+	1.6451	19.0439	0.002449	2.02598	-2.92783	A0A0J9YV56;E9Q0U3;D3Z7P0;Q8K3W0;E9Q8Q1	A0A0J9YV56;E9Q0U3;D3Z7P0;Q8K3W0;E9Q8Q1	BRCA1-A complex subunit BRE	Bre
18.7129	17.5044	17.0308	16.6208	17.7214	16.5099		3.3046	17.1314	0	0.436949	-0.992955	A0A0J9YVG0;Q61074	A0A0J9YVG0;Q61074	Protein phosphatase 1G	Ppm1g
18.4402	17.7368	17.1011	15.262	17.7133	15.1179		9.24	19.408	0	0.469214	-1.67288	A0A0N4SUL6;O35130	A0A0N4SUL6;O35130	Ribosomal RNA small subunit methyltransferase NEP1	Emg1
30.9566	31.0933	28.8135	28.9139	29.0523	29.19	+	158.55	31.6589	0	2.58731	-1.90386	A0A0N4SV66;Q8CGP4;C0HKE9;C0HKE8;C0HKE7;C0HKE6;C0HKE5;C0HKE4;C0HKE3;C0HKE2;C0HKE1;Q8CGP6;Q8R1M2;Q8CGP7;Q8CGP5;Q8BFU2;G3UWL7	A0A0N4SV66;Q8CGP4;C0HKE9;C0HKE8;C0HKE7;C0HKE6;C0HKE5;C0HKE4;C0HKE3;C0HKE2;C0HKE1;Q8CGP6;Q8R1M2;Q8CGP7;Q8CGP5;Q8BFU2	Histone H2A;Histone H2A type 1-H;Histone H2A.J;Histone H2A type 1-K;Histone H2A type 1-F;Histone H2A type 3	Hist1h2aa;Hist1h2ah;H2afj;Hist1h2ak;Hist1h2af;Hist3h2a
18.8615	17.3958	17.5999	16.4206	18.027	18.6468		1.3347	20.9297	0.0053191	0.087229	0.208234	A0A0N4SVQ1;Q62425	A0A0N4SVQ1;Q62425	Cytochrome c oxidase subunit NDUFA4	Ndufa4
19.7007	19.8879	19.2043	19.3114	19.1816	19.1126		25.602	21.711	0	1.6393	-0.647194	A0A0N4SVS6;P53996	A0A0N4SVS6;P53996	Cellular nucleic acid-binding protein	Cnbp
17.9877	18.0326	17.7137	16.6813	17.546	16.3049		3.4719	17.784	0	0.652118	-1.08472	F6QKD2;A0A0N4SVT1;Q9CWX9;A0A0N4SV55;A0A0N4SVK2	F6QKD2;A0A0N4SVT1;Q9CWX9;A0A0N4SV55;A0A0N4SVK2	Probable ATP-dependent RNA helicase DDX47	Ddx47
19.707	21.3633	18.0138	18.3888	18.0057	20.9727		120.43	21.1004	0	0.221235	-1.04598	A0A0N4SW89;P97429;D3Z0S1;A0A0N4SV57;S4R1F2;F7ANV6	A0A0N4SW89;P97429;D3Z0S1;A0A0N4SV57;S4R1F2;F7ANV6	Annexin A4;Annexin	Anxa4
18.2066	18.0499	20.0589	20.3951	17.0522	20.2098		11.451	21.815	0	0.107581	0.502756	A0A0N4SW94;O35682	A0A0N4SW94;O35682	Myeloid-associated differentiation marker	Myadm
21.1963	20.8619	17.5413	18.5314	18.898	16.3016		18.8	20.151	0	0.920741	-3.42932	A0A0N5E9G7;G3X8Z6;Q5U4B1;G3UWX1;P35601	A0A0N5E9G7;G3X8Z6;Q5U4B1;G3UWX1;P35601	Replication factor C subunit 1	Rfc1
17.8855	17.7983	17.9929	17.6597	17.291	16.3779		5.4579	17.8414	0	0.798073	-1.00745	A0A0R3P9C8;Q9DC69	A0A0R3P9C8;Q9DC69	NADH dehydrogenase [ubiquinone] 1 alpha subcomplex subunit 9, mitochondrial	Ndufa9
21.3129	21.5999	17.0562	16.4174	16.9406	16.919	+	4.3714	20.4985	0	2.99602	-4.52659	A0A0R4J008;P70288;Q8BQ10	A0A0R4J008;P70288;Q8BQ10	Histone deacetylase 2	Hdac2
18.4851	17.2858	20.0215	20.2896	19.9057	17.0424		4.5784	21.4538	0	0.13018	0.588593	A0A0R4J034;Q99K01;D3YZA7	A0A0R4J034;Q99K01	Pyridoxal-dependent decarboxylase domain-containing protein 1	Pdxdc1
19.6513	19.6382	18.2586	18.0063	18.3483	18.1671	+	17.268	20.1785	0	2.37045	-1.38708	A0A0R4J047;Q9CYI4;D3Z765;D3YZ82	A0A0R4J047;Q9CYI4;D3Z765	Putative RNA-binding protein Luc7-like 1	Luc7l
22.9215	22.7693	17.2908	16.4919	17.595	17.368	+	4.9442	21.5856	0	3.1884	-5.36393	E9Q577;A0A0R4J073;Q5U5Q9;A0A0R4J183;E9PWM5	E9Q577;A0A0R4J073;Q5U5Q9;A0A0R4J183;E9PWM5	BRCA1-A complex subunit RAP80	Uimc1
18.5014	18.0675	17.7887	18.1372	17.6128	17.8066		1.5107	19.1543	0.0031621	0.864109	-0.57476	A0A0R4J083;P51174	A0A0R4J083;P51174	Long-chain specific acyl-CoA dehydrogenase, mitochondrial	Acadl
18.2645	17.1528	16.9466	17.0201	17.3542	17.9429		9.6321	19.4075	0	0.030274	-0.0600319	D6RDT4;A0A0R4J091;Q9JKP7	D6RDT4;A0A0R4J091;Q9JKP7	DNA polymerase epsilon subunit 3	Pole3
17.7819	16.8364	18.5861	18.7125	16.8276	16.8554		5.2779	20.9611	0	0.369548	-0.467629	A0A0R4J093;Q9DBP5	A0A0R4J093;Q9DBP5	UMP-CMP kinase	Cmpk1
18.5179	17.3836	19.8562	19.6329	19.1307	19.1941		3.5084	21.1264	0	0.778464	1.21163	A0A0R4J0D3;Q3TDQ1	A0A0R4J0D3;Q3TDQ1	Dolichyl-diphosphooligosaccharide--protein glycosyltransferase subunit STT3B	Stt3b
17.6566	17.4136	20.4236	20.7852	17.6308	17.3454		51.085	21.6441	0	0.0833377	-0.0470085	A0A2I3BQL9;A0A0R4J0G0;Q8BH04;A0A2I3BS39;A0A2I3BRX1;A0A2I3BQC6	A0A2I3BQL9;A0A0R4J0G0;Q8BH04;A0A2I3BS39;A0A2I3BRX1	Phosphoenolpyruvate carboxykinase [GTP], mitochondrial	Pck2
17.3587	17.8435	17.5894	19.4875	20.2872	19.7616	+	4.7026	21.1467	0	1.67614	2.42326	A0A0R4J0H7;Q8K2Z4	A0A0R4J0H7;Q8K2Z4	Condensin complex subunit 1	Ncapd2
17.874	17.3279	21.7273	21.711	21.7506	22.0913	+	134.74	23.391	0	2.25933	4.31998	A0A0R4J0H8;Q6NWW9;A0A0A6YX88	A0A0R4J0H8;Q6NWW9	Fibronectin type III domain-containing protein 3B	Fndc3b
19.2565	19.8848	19.4668	19.8394	18.7022	19.2846		4.5064	21.2045	0	0.508404	-0.577187	A0A0R4J0Q5;P21619	A0A0R4J0Q5;P21619	Lamin-B2	Lmnb2
17.9022	17.5793	21.6764	21.7035	21.2407	21.0858	+	34.722	23.0466	0	2.56432	3.42247	A0A0R4J0Z1;P08003	A0A0R4J0Z1;P08003	Protein disulfide-isomerase A4	Pdia4
18.307	19.0558	17.607	17.1405	16.6909	23.3894		1.3101	24.8609	0.005283	0.13916	1.35874	A0A0R4J124;O54781	A0A0R4J124;O54781	SRSF protein kinase 2;SRSF protein kinase 2 N-terminal;SRSF protein kinase 2 C-terminal	Srpk2
17.8215	17.8416	17.3529	17.4583	18.3601	16.3292		1.5582	17.4653	0.0031923	0.168203	-0.486949	G3UX35;A0A0R4J170;Q3TKT4	G3UX35;A0A0R4J170;Q3TKT4	Transcription activator BRG1	Smarca4
20.5961	16.7629	16.8356	16.958	16.3658	16.5837		10.471	17.417	0	0.432287	-2.20476	F7DAY5;F6YB25;A0A0R4J195;Q9CSU0	F7DAY5;F6YB25;A0A0R4J195;Q9CSU0	Regulation of nuclear pre-mRNA domain-containing protein 1B	Rprd1b
18.0583	17.9004	18.5818	17.4362	16.9281	16.2103	+	1.236	20.5353	0.0081542	1.20972	-1.41014	A0A0R4J1C2;A0A0R4IZW8;O88456	A0A0R4J1C2;A0A0R4IZW8;O88456	Calpain small subunit 1	Capns1
19.4486	16.3987	17.6246	16.4443	16.9589	17.9181		3.8469	19.1758	0	0.102281	-0.485176	A0A0R4J1E3;Q9QXS6	A0A0R4J1E3;Q9QXS6	Drebrin	Dbn1
18.3053	17.8646	21.6091	21.5479	17.4007	21.4992		58.54	23.4411	0	0.239649	1.36499	A0A0R4J1L2;Q91VK2;F6ZFU0;D3Z7N2;D3YY68	A0A0R4J1L2;Q91VK2;F6ZFU0;D3Z7N2;D3YY68		Eef1d
17.2895	18.3337	16.7013	16.6928	16.8709	19.406		1.6407	21.427	0.002441	0.0789546	0.326825	D3YTV4;A0A286YDF9;Q5RJ53;A0A286YD32;A0A0R4J1L3;Q91VW9	D3YTV4;A0A286YDF9;Q5RJ53;A0A286YD32;A0A0R4J1L3;Q91VW9	Zinc finger protein with KRAB and SCAN domains 3	Zkscan3
18.3607	16.6161	21.0897	21.1944	17.1292	20.9194		141.27	22.4373	0	0.269024	1.53591	A0A0R4J1Y7;E9PXX7;Q91W90	A0A0R4J1Y7;E9PXX7;Q91W90	Thioredoxin domain-containing protein 5	Txndc5
16.9466	17.9635	16.3819	19.2056	18.6464	16.9076		13.153	20.6596	0	0.10818	0.321984	Q9CZM3;A0A0R4J1Z3;Q9CR67	Q9CZM3;A0A0R4J1Z3;Q9CR67	Transmembrane protein 33	Tmem33
18.327	16.9243	22.3261	22.2096	21.8099	21.9151	+	78.811	23.6272	0	1.57734	4.23686	G3UXJ6;G3UZI2;A0A0R4J259;G3V018;Q7TMK9;G3UWM1;G3UZ48;G3XA76;G3UXU5;S4R1E9;A2AW41;F7B5B5;Q8VHM5	G3UXJ6;G3UZI2;A0A0R4J259;G3V018;Q7TMK9;G3UWM1;G3UZ48	Heterogeneous nuclear ribonucleoprotein Q	Syncrip
20.7812	18.4349	16.9343	16.3283	17.3987	16.9266		14.997	20.6217	0	0.750281	-2.44539	A0A0U1RNT6;A0A0U1RNK6;Q3THS6	A0A0U1RNT6;A0A0U1RNK6;Q3THS6	S-adenosylmethionine synthase isoform type-2	Mat2a
18.1084	18.8181	16.9646	17.0089	16.2903	16.651	+	1.7714	16.4783	0.00083126	1.42399	-1.99254	A0A0U1RPJ7;D3YVR9;Q9R0P4	A0A0U1RPJ7;D3YVR9;Q9R0P4	Small acidic protein	1110004F10Rik;Smap
18.7687	18.6417	17.3985	17.0275	17.4592	20.1964		3.6654	21.3294	0	0.0283316	0.12261	A0A0U1RPL0;Q7TQH0;E9Q5Q0;J3QP59	A0A0U1RPL0;Q7TQH0;E9Q5Q0	Ataxin-2-like protein	Atxn2l
22.3174	22.1735	18.8181	19.0008	20.1615	20.3207	+	13.224	22.0822	0	2.54482	-2.00432	A0A140LHA2;Q9WVA3;A0A140LIM5;A0A140LJ21;A0A140LI47	A0A140LHA2;Q9WVA3;A0A140LIM5;A0A140LJ21	Mitotic checkpoint protein BUB3	Bub3
17.1513	18.5617	16.8781	16.7585	15.916	18.3468		1.1366	20.6598	0.009434	0.18228	-0.725066	A0A140LJG6;A0A140LHR3;A0A140LJ01;A0A140LHG8;Q9CYN2	A0A140LJG6;A0A140LHR3;A0A140LJ01;A0A140LHG8;Q9CYN2	Signal peptidase complex subunit 2	Spcs2
18.42	17.7183	17.1319	16.2107	17.4224	17.9052		3.4911	19.7184	0	0.354947	-0.405385	A0A140LJ82;A0A140LHM9;Q9D9M4	A0A140LJ82;A0A140LHM9;Q9D9M4	PDZ domain-containing protein 9	Pdzd9
17.4415	17.8958	18.6224	17.0462	17.9044	19.8142		1.7091	22.1937	0.0008244	0.457258	1.19064	A0A140LIG8;A0A140LJE1;Q3U3V8	A0A140LIG8;A0A140LJE1;Q3U3V8	X-ray radiation resistance-associated protein 1	Xrra1
18.8639	18.2241	17.3967	20.3853	16.1394	16.0898	+	82.187	21.0515	0	1.76948	-2.42939	G3X909;G3UY21;A0A140T8T2;G3UYX7;Q9R1B9;G3UZ61;E9Q117;E9QAW9;E9Q2P0;Q80TR4	G3X909;G3UY21;A0A140T8T2;G3UYX7;Q9R1B9	Slit homolog 2 protein;Slit homolog 2 protein N-product;Slit homolog 2 protein C-product	Slit2
21.4032	21.2078	22.9018	23.9935	22.7276	22.8558	+	163.83	25.7517	0	2.21299	1.48623	A0A140T8T4;P51410;D3Z629;A0A0G2JES3;D3YZT0;A0A0G2JFQ3;S4R1R7	A0A140T8T4;P51410;D3Z629;A0A0G2JES3;D3YZT0	60S ribosomal protein L9	Rpl9
19.0587	20.2447	16.3078	18.1753	17.524	18.7732		1.5976	20.1366	0.003231	0.651581	-1.50312	I7HIK9;Q80ZA1;A0A158SIS7;Q549C9;P02340	I7HIK9;Q80ZA1;A0A158SIS7;Q549C9;P02340	Cellular tumor antigen p53	Trp53;Tp53
23.2309	23.4986	21.7996	21.6268	21.8523	22.3685	+	16.166	23.838	0	1.30325	-1.25437	A0A171KXD3;Q9JIF0;A0A140LJF4;A0A140LJ70;A0A140LHF7;A0A140LHS4;A0A140LI33;A0A140LIF7;A0A140LJ68;Q6PAK3	A0A171KXD3;Q9JIF0;A0A140LJF4;A0A140LJ70;A0A140LHF7;A0A140LHS4	Protein arginine N-methyltransferase 1	Prmt1
18.9833	17.6827	17.456	16.0685	16.4562	17.0448		2.0693	19.3085	0	0.804286	-1.58251	A0A1B0GRI0;A0A1B0GR19;A0A1B0GR86;Q8BH97	A0A1B0GRI0;A0A1B0GR19;A0A1B0GR86;Q8BH97	Reticulocalbin-3	Rcn3
18.1892	17.3931	15.9401	15.7303	18.0084	16.9458		1.71	18.6484	0.00082576	0.165725	-0.31404	A0A1B0GRC0;F7CK55;A0A1B0GSI7;Q63ZW6;P02463	A0A1B0GRC0;F7CK55;A0A1B0GSI7;Q63ZW6;P02463	Collagen alpha-1(IV) chain;Arresten	Col4a5;Col4a1
18.3563	18.6516	17.4199	16.3153	18.2209	18.5263		1.3507	20.2945	0.0045837	0.22041	-0.130336	A0A1B0GRW3;Q9WTM5;A0A1B0GT54;A0A1B0GSR4	A0A1B0GRW3;Q9WTM5;A0A1B0GT54;A0A1B0GSR4	RuvB-like 2	Ruvbl2
18.9187	17.4409	17.8934	16.3473	18.1387	15.9441		3.3651	20.2486	0	0.318606	-1.13843	A0A1B0GRX1;P70677	A0A1B0GRX1;P70677	Caspase-3;Caspase-3 subunit p17;Caspase-3 subunit p12	Casp3
18.6654	16.9299	16.1595	16.8068	17.2721	16.5172		1.216	18.3279	0.0095659	0.35591	-0.90303	A0A1B0GS70;Q9R1P4	A0A1B0GS70;Q9R1P4	Proteasome subunit alpha type-1	Psma1
25.3114	25.2333	25.5405	25.5363	25.3407	25.5862		323.31	27.5691	0	0.558859	0.191099	A0A1B0GSR9;Q564E2;P06151;A0A1B0GSX0;D3YZQ9;A0A1B0GT41;A0A1B0GQX5;A0A1B0GSL7;A0A1B0GRW9;A0A1B0GS79;A0A1B0GRC1;A0A1B0GRS2;D3YVR7;D3YZE4;P00342;A0A1B0GSR2;A0A0N4SVV8;D3Z7F0;A0A1B0GRE9;P16125	A0A1B0GSR9;Q564E2;P06151;A0A1B0GSX0;D3YZQ9;A0A1B0GT41;A0A1B0GQX5;A0A1B0GSL7	L-lactate dehydrogenase;L-lactate dehydrogenase A chain	Ldha
18.1556	18.2355	17.5197	17.3451	17.4544	15.5976		42.331	18.0703	0	0.669146	-1.66957	D3Z0B9;A0A1B0GSU0;Q571I9	D3Z0B9;A0A1B0GSU0;Q571I9	Aldehyde dehydrogenase family 16 member A1	Aldh16a1
19.068	16.4832	16.4707	16.2557	17.7918	17.8602		16.858	19.7987	0	0.0121269	0.0503674	A0A1B0GT81;Q07813;A0A1B0GS13;A0A1B0GTA4;A0A1B0GSH8;A0A1B0GT35	A0A1B0GT81;Q07813;A0A1B0GS13;A0A1B0GTA4;A0A1B0GSH8	Apoptosis regulator BAX	Bax
17.928	18.0902	17.9956	16.5244	17.2354	18.4441		1.3452	19.4969	0.0045732	0.0929456	-0.169305	A0A1C7CYV0;B1AX58;Q99K51	A0A1C7CYV0;B1AX58;Q99K51	Plastin-3	Pls3
17.4468	17.0798	19.5538	18.1027	18.2311	16.197		2.1689	19.5538	0	0.0148749	-0.0492411	A0A1D5RLN5;A0A1D5RLY2;Q80WQ2	A0A1D5RLN5;A0A1D5RLY2;Q80WQ2	Protein VAC14 homolog	Vac14
20.2467	21.5915	23.9015	23.9299	23.73	23.4565	+	107.34	26.141	0	1.22201	2.67419	A0A1D5RLW5;A0A1D5RM85;P62717;A0A1D5RME4;A0A1D5RM79;A0A1D5RMC7	A0A1D5RLW5;A0A1D5RM85;P62717;A0A1D5RME4	60S ribosomal protein L18a	Rpl18a
24.3345	17.5266	18.2043	16.8048	16.987	16.2297		1.8144	24.267	0.00084034	0.475998	-4.32217	B7ZWL1;A0A1D5RMJ8;Q6ZQ08;A0A1D5RM04;A0A1D5RMD8	B7ZWL1;A0A1D5RMJ8;Q6ZQ08;A0A1D5RM04;A0A1D5RMD8	CCR4-NOT transcription complex subunit 1	Cnot1
17.8569	17.8425	18.1236	15.6518	16.4619	16.7005	+	1.5012	16.9199	0.0031521	2.05729	-1.26849	A0A1D5RML8;P97760	A0A1D5RML8;P97760	DNA-directed RNA polymerase II subunit RPB3	Polr2c
18.6762	18.4242	17.2722	16.8677	17.8035	16.1359		41.921	16.4265	0	0.695191	-1.58049	A0A1I7Q4A6;Q9CPQ5	A0A1I7Q4A6;Q9CPQ5	Centromere protein Q	Cenpq
21.4872	21.5788	17.4513	15.2624	16.0029	16.4112	+	10.421	20.2995	0	2.81247	-5.326	A0A1I7Q4G8;E9QMN5;Q8CHY6;A0A1D5RM07;A0A1D5RM58	A0A1I7Q4G8;E9QMN5;Q8CHY6	Transcriptional repressor p66 alpha	Gatad2a
17.0261	18.9584	21.1971	16.8294	17.6541	18.0282		1.2513	22.4574	0.0074405	0.0496106	-0.151117	A0A1L1SVA4;A0A1L1SQ78;A0A1L1SQU5;Q9D174	A0A1L1SVA4;A0A1L1SQ78;A0A1L1SQU5;Q9D174	SS18-like protein 2	Ss18l2
18.5393	21.5182	23.2446	23.2907	23.268	23.3218		17.894	25.6576	0	0.796843	3.26617	A0A1L1SQA8;P62852	A0A1L1SQA8;P62852	40S ribosomal protein S25	Rps25
20.0717	15.9983	17.7828	17.3309	16.6159	16.6985		1.1246	19.5224	0.0094135	0.245228	-1.3778	A0A1L1SRH8	A0A1L1SRH8
17.5879	19.4952	17.2362	15.4948	17.075	15.5172		42.639	17.6882	0	0.678228	-2.24545	A0A1L1SRP6;Q8CFB8;Q3ULW8;E9Q992;E9PX17	A0A1L1SRP6;Q8CFB8;Q3ULW8		Parp3
18.0086	17.4184	22.6079	22.9886	20.7379	20.6778	+	60.604	23.8232	0	2.01452	2.99429	Q5NCU4;A0A1L1SSH9;P07214;Q5NCU3	Q5NCU4;A0A1L1SSH9;P07214	SPARC	Sparc
18.3061	19.5369	18.2143	16.9351	17.3997	16.7629		2.5134	17.8123	0	0.930588	-1.84021	E9QPK4;A0A1L1SSL9;Q9JKK8	E9QPK4;A0A1L1SSL9;Q9JKK8	Serine/threonine-protein kinase ATR	Atr
19.3569	17.6754	16.9922	15.8243	18.5464	19.1841		7.6177	19.3557	0	0.133548	0.349094	A0A1L1STE6;Q9D6R2	A0A1L1STE6;Q9D6R2	Isocitrate dehydrogenase [NAD] subunit alpha, mitochondrial	Idh3a
16.5695	17.5935	21.0355	20.8869	21.2488	21.4801	+	56.854	22.8175	0	1.83301	4.28297	A0A1L1SV25;P57780;E9Q2W9;D3Z0L8;A0A1L1SVJ6;D3Z761	A0A1L1SV25;P57780;E9Q2W9	Alpha-actinin-4	Actn4
21.7703	22.113	20.8697	21.5296	21.6889	21.8297		30.91	23.947	0	0.367845	-0.182339	A0A1W2P6G5;A0A1W2P6F6;A0A1W2P7Q9;Q60605;Q8CI43	A0A1W2P6G5;A0A1W2P6F6;A0A1W2P7Q9;Q60605	Myosin light polypeptide 6	Myl6
17.9068	17.7188	16.4763	17.8924	15.5046	15.1183	+	24.801	18.7923	0	2.13716	-2.50137	A0A1W2P6L9;Q3UQ28	A0A1W2P6L9;Q3UQ28	Peroxidasin homolog	Pxdn
18.1487	17.8845	17.7943	17.439	16.9639	18.839		5.0299	21.3711	0	0.038903	-0.115154	A0A1W2P729;Q9QXT0	A0A1W2P729;Q9QXT0	Protein canopy homolog 2	Cnpy2
18.0716	17.0732	20.9946	21.1831	21.2402	21.5174	+	169.22	22.8303	0	1.74411	3.80634	A0A1W2P733;Q922D8;A0A1W2P7L5	A0A1W2P733;Q922D8	C-1-tetrahydrofolate synthase, cytoplasmic;Methylenetetrahydrofolate dehydrogenase;Methenyltetrahydrofolate cyclohydrolase;Formyltetrahydrofolate synthetase;C-1-tetrahydrofolate synthase, cytoplasmic, N-terminally processed	Mthfd1
29.4975	29.3704	27.9749	27.9651	28.0303	28.248	+	13.728	30.6358	0	2.02947	-1.29477	E0CZ27;F8WI35;A0A1W2P768;P84244;P84228;P68433;P02301;E0CYN1;E0CYR7	E0CZ27;F8WI35;A0A1W2P768;P84244;P84228;P68433;P02301	Histone H3;Histone H3.3;Histone H3.2;Histone H3.1;Histone H3.3C	H3f3a;Hist1h3b;Hist1h3a;H3f3c
18.1896	21.696	16.0254	17.6601	17.2279	19.8376		101.28	21.1806	0	0.2329	-1.4101	A0A1W2P7H9;A0A1W2P7T3;P84089;G3UW85	A0A1W2P7H9;A0A1W2P7T3;P84089;G3UW85	Enhancer of rudimentary homolog	Erh
18.3457	17.8846	17.6475	16.4131	17.1438	16.7237		1.2627	16.5949	0.0074516	1.19954	-1.18139	A0A1W2P7R5;A0A1W2P7P6;Q91W52	A0A1W2P7R5;A0A1W2P7P6;Q91W52	Transmembrane protein 19	Tmem19
17.5817	16.3295	16.6276	17.5745	18.1664	17.2374		1.7019	19.8075	0.00082305	0.357086	0.746275	A0A1W2P7X0;E9QMV2;Q4KML4	A0A1W2P7X0;E9QMV2;Q4KML4	Costars family protein ABRACL	Abracl
18.3457	18.0753	17.0786	16.673	17.2726	19.3134		1.1449	21.4701	0.0094545	0.0252905	0.0824814	A0A1W2P7Z3;P61089	A0A1W2P7Z3;P61089	Ubiquitin-conjugating enzyme E2 N	Ube2n
16.8814	17.3727	17.3976	16.8627	17.4429	21.8924		1.2779	23.8603	0.0059925	0.427051	2.54059	A0A1Y7VJC3;A0A1Y7VNC5;Q61043	A0A1Y7VJC3;A0A1Y7VNC5;Q61043	Ninein	Nin
18.5253	17.6742	18.524	17.2828	16.6092	15.3564		3.888	17.2017	0	0.967839	-2.11695	A0A1Y7VJN8;A0A338P6J9;Q921U7;Q8C281;Q8CE04;Q8CE80;P51125	A0A1Y7VJN8;A0A338P6J9;Q921U7;Q8C281;Q8CE04;Q8CE80;P51125	Calpastatin	Cast
17.8637	17.1458	15.5359	17.2137	17.4429	16.832		1.2491	15.6176	0.0074294	0.286216	-0.367328	E0CY91;E0CYW1;E0CY38;A0A1Y7VKT9;E0CZB3;Q9EPV8	E0CY91;E0CYW1;E0CY38;A0A1Y7VKT9;E0CZB3;Q9EPV8	Ubiquitin-like protein 5	Ubl5
21.6686	22.2021	23.1206	23.1896	23.0684	23.005	+	3.0082	25.0932	0	1.26242	1.10139	A0A286YDB7;A0A286YCT4;A0A286YCG8;Q9CY50	A0A286YDB7;A0A286YCT4;A0A286YCG8;Q9CY50	Translocon-associated protein subunit alpha	Ssr1
20.742	20.6838	23.9748	23.9387	23.5786	23.4595	+	39.201	25.4876	0	3.25346	2.80616	A0A286YDA2;A0A286YDT3;E9Q5C9;A0A286YDV7;A0A286YCD1;A0A286YDZ1	A0A286YDA2;A0A286YDT3;E9Q5C9;A0A286YDV7		Nolc1
18.1476	18.8174	19.0584	18.9196	19.0372	19.3159		4.5768	20.6409	0	0.708122	0.694056	E9Q390;A0A286YDF5;Q69ZN7;A0A286YCZ3	E9Q390;A0A286YDF5;Q69ZN7;A0A286YCZ3	Myoferlin	Myof
23.7769	22.536	18.5661	18.2026	19.11	15.6939	+	123.54	22.1434	0	1.06089	-5.75448	A0A286YDG5;Q8CG46	A0A286YDG5;Q8CG46	Structural maintenance of chromosomes protein 5	Smc5
19.2242	18.4115	20.1249	20.0462	19.329	19.4534		117.31	22.234	0	0.526125	0.573405	A0A286YDS5;Q99KF1	A0A286YDS5;Q99KF1	Transmembrane emp24 domain-containing protein 9	Tmed9
18.8419	17.8824	16.9695	16.6349	18.9178	17.3482		52.623	18.8752	0	0.0827374	-0.229114	F7B6X4;A0A286YDU2;F6U2C2;E9QM77;O70305	F7B6X4;A0A286YDU2;F6U2C2;E9QM77;O70305	Ataxin-2	Atxn2
18.3437	18.8802	17.2288	19.3427	15.8449	17.5747		1.4568	20.2846	0.0031104	0.768301	-1.90207	A0A2C9F2D2;Q07076	A0A2C9F2D2;Q07076	Annexin A7	Anxa7
19.2832	16.7362	19.3884	20.0479	18.1539	17.6602		17.278	20.9232	0	0.0249631	-0.102636	A0A2I3BPT1;A0A2I3BQZ9;Q3TWF3;P12023;A0A2I3BR03;A0A1L1SS44;Q60709;Q06335	A0A2I3BPT1;A0A2I3BQZ9;Q3TWF3;P12023;A0A2I3BR03	Amyloid beta A4 protein;N-APP;Soluble APP-alpha;Soluble APP-beta;C99;Beta-amyloid protein 42;Beta-amyloid protein 40;C83;P3(42);P3(40);C80;Gamma-secretase C-terminal fragment 59;Gamma-secretase C-terminal fragment 57;Gamma-secretase C-terminal fragment 50;C31	App
18.5733	17.3533	17.1462	17.6707	17.6389	17.4871		1.6341	16.2062	0.002439	0.235294	-0.400346	A0A2I3BQ39;Q9JKB1;P58321	A0A2I3BQ39;Q9JKB1;P58321	Ubiquitin carboxyl-terminal hydrolase isozyme L3;Ubiquitin carboxyl-terminal hydrolase isozyme L4	Uchl3;Uchl4
17.2644	17.5298	17.2727	16.3765	16.9169	16.5635		1.3171	15.2145	0.005295	1.01331	-0.656902	H3BLM7;H9H9T1;A0A2I3BR29;Q3TGF2	H3BLM7;H9H9T1;A0A2I3BR29;Q3TGF2	Protein FAM107B	Fam107b
24.2125	24.2152	17.44	15.8303	25.9773	26.0263	+	119.74	26.4495	0	3.72454	1.78793	Q8K1K3;A0A2I3BRL3;Q9QXG9;A0A2I3BRI7;A0A2I3BPS4	Q8K1K3;A0A2I3BRL3;Q9QXG9	TERF1-interacting nuclear factor 2	Tinf2
17.8455	18.1015	19.8769	17.2259	17.2267	16.7578		1.9632	20.284	0	1.17544	-0.98123	A2AFI4;A2AFI3;A0A2I3BRL8;Q91VM5;Q9WV02;A0A2I3BQC0	A2AFI4;A2AFI3;A0A2I3BRL8;Q91VM5;Q9WV02;A0A2I3BQC0	RNA binding motif protein, X-linked-like-1;RNA-binding motif protein, X chromosome;RNA-binding motif protein, X chromosome, N-terminally processed	Rbmx;Rbmxl1
18.55	17.5819	17.1203	15.3528	18.4015	17.1174		13.573	17.7012	0	0.130923	-0.306518	A0A2I3BS49;Q9CXU4;Q9WTQ8	A0A2I3BS49;Q9CXU4;Q9WTQ8	Mitochondrial import inner membrane translocase subunit Tim23	Timm23
18.0607	17.8034	16.621	17.0705	17.2764	16.5245		1.9783	17.7371	0	0.914213	-1.03164	A0A2R8VHH1;Q99P88	A0A2R8VHH1;Q99P88	Nuclear pore complex protein Nup155	Nup155
18.2693	22.6962	22.4369	22.4663	22.3805	22.2383		19.307	24.3513	0	0.304352	1.82665	A0A2R8VI25;Q3TT81;A0A2R8VHP9;B2M1R7;Q61990;A0A2R8VHN3;A0A2R8VHG2;A0A2R8VKF0;A0A2R8VJY1;A0A2R8W6L5;A0A2R8VHZ0;A0A2R8VI71;A0A2R8VHY9;A0A2R8VKN0;A0A2R8VI73;A0A2R8W6U6;A0A2R8VI12;A0A2R8VHL8;A0A2R8VI92;A0A2R8VI15;E9Q7D8;P57722;A0A2R8VHI3;A0A2R8W6H3	A0A2R8VI25;Q3TT81;A0A2R8VHP9;B2M1R7;Q61990;A0A2R8VHN3;A0A2R8VHG2;A0A2R8VKF0;A0A2R8VJY1;A0A2R8W6L5;A0A2R8VHZ0;A0A2R8VI71;A0A2R8VHY9;A0A2R8VKN0;A0A2R8VI73;A0A2R8W6U6;A0A2R8VI12;A0A2R8VHL8	Poly(rC)-binding protein 2	Pcbp2
18.1243	17.6495	20.4013	20.0994	20.7816	20.9336	+	57.239	22.0718	0	2.15685	2.97072	A0A2R8W6Y5;A0A2R8VKL5;E9Q066;G3X9Q6;Q8BWW4	A0A2R8W6Y5;A0A2R8VKL5;E9Q066;G3X9Q6;Q8BWW4	La-related protein 4	Larp4
18.5144	20.1956	17.3578	17.1982	17.9843	17.5856		2.2205	20.0548	0	0.676121	-1.57001	A0A2R8W6R3;P62878	A0A2R8W6R3;P62878	E3 ubiquitin-protein ligase RBX1;E3 ubiquitin-protein ligase RBX1, N-terminally processed	Rbx1
17.7539	17.2561	17.44	16.5079	17.4406	16.2597		1.1809	18.0486	0.0094891	0.382691	-0.65486	A0A338P6P7;A0A2R8W6S4;Q9WVE8	A0A338P6P7;A0A2R8W6S4;Q9WVE8	Protein kinase C and casein kinase substrate in neurons protein 2	Pacsin2
18.1093	18.6181	18.4	18.977	18.853	18.488		8.3668	21.3975	0	0.366082	0.306787	A0A338P6B4;A0A338P6I2;Q923G2	A0A338P6B4;A0A338P6I2;Q923G2	DNA-directed RNA polymerases I, II, and III subunit RPABC3	Polr2h
22.7868	22.4581	20.9396	20.9734	21.6357	21.6837	+	3.4001	23.9631	0	1.54515	-0.962719	Q3TE85;A0A338P6F6;P17095;A0A338P6E8;A0A338P6D0	Q3TE85;A0A338P6F6;P17095;A0A338P6E8	High mobility group protein HMG-I/HMG-Y	Hmga1
20.3542	20.2958	19.5759	19.2933	20.1304	20.1883		1.6953	22.4498	0.00082102	1.24807	-0.16563	A0A338P6G6;A0A384DV79	A0A338P6G6;A0A384DV79
16.7962	16.239	15.8703	15.9904	18.4659	16.4614		1.2477	19.0303	0.0074239	0.338069	0.946048	A0A338P6X2;Q9D6U8	A0A338P6X2;Q9D6U8	Protein FAM162A	Fam162a
17.6457	17.1412	17.6325	18.401	16.2628	15.7001	+	2.868	19.7724	0	1.18878	-1.41204	A0A338P7E5;A0A338P786;P68037	A0A338P7E5;A0A338P786;P68037	Ubiquitin-conjugating enzyme E2 L3	Ube2l3
17.9392	17.4528	19.4563	19.294	16.897	17.1299		19.129	20.9618	0	0.896194	-0.682539	A0A338P7D7;Q9Z2U0;Q9CWH6	A0A338P7D7;Q9Z2U0;Q9CWH6	Proteasome subunit alpha type-7;Proteasome subunit alpha type-7-like	Psma7;Psma8
22.3591	22.039	24.5811	24.833	24.7384	24.879	+	323.31	27.0838	0	2.35082	2.60962	A0A3B2WBL1;Q5XJF6;P53026;A0A3B2W824;A0A3B2WDD2;A0A3B2W820;A0A3B2WCA5;D6RE43	A0A3B2WBL1;Q5XJF6;P53026;A0A3B2W824;A0A3B2WDD2;A0A3B2W820	Ribosomal protein;60S ribosomal protein L10a	Rpl10a
21.8301	21.7931	20.9296	20.5097	21.248	21.4359		34.616	23.0174	0	1.40715	-0.469617	A0A3B2WCD8;Q3U0V1;A0A3B2W465	A0A3B2WCD8;Q3U0V1	Far upstream element-binding protein 2	Khsrp
18.5971	18.8458	16.9233	16.4681	17.6658	15.2109		10.187	18.6362	0	0.687285	-2.28311	A0A3B2WCL5;Q9CT10	A0A3B2WCL5;Q9CT10	Ran-binding protein 3	Ranbp3
23.1565	23.0941	17.2276	16.8058	21.0519	21.4794	+	11.595	22.5015	0	1.87868	-1.85964	A1L3S7;Q8VHR5;A0A0U1RNM2	A1L3S7;Q8VHR5;A0A0U1RNM2	Transcriptional repressor p66-beta	Gatad2b
19.0017	18.1515	18.3817	17.9987	17.1319	16.9707	+	6.1834	17.5035	0	1.14335	-1.52531	E9PXY1;A2A432;J3QJX0	E9PXY1;A2A432;J3QJX0	Cullin-4B	Cul4b
20.7104	20.6945	23.136	22.9285	22.7243	21.9911	+	68.144	24.8521	0	1.33978	1.65532	A2A547;P84099	A2A547;P84099	Ribosomal protein L19;60S ribosomal protein L19	Rpl19
18.0783	17.6005	17.9719	19.2554	17.3595	15.8642		23.157	20.2144	0	0.587936	-1.2276	A2A5R8;Q9DBE7;A2A5S3;Q9Z108;V9GX87	A2A5R8;Q9DBE7;A2A5S3;Q9Z108;V9GX87	Double-stranded RNA-binding protein Staufen homolog 1	Stau1
18.8572	18.5114	19.8769	19.4774	19.1138	19.2599		62.215	21.3948	0	0.936563	0.502555	A2A6G9;A2A6H0;Q61792;A2A6G7;A2A6G8;A2A6G6;A2A6H1;A2A6G5;E9Q0N6	A2A6G9;A2A6H0;Q61792;A2A6G7;A2A6G8;A2A6G6	LIM and SH3 domain protein 1	Lasp1
17.5117	16.9989	17.4378	18.034	17.2013	16.3535		12.391	18.7442	0	0.360038	-0.477933	A2A6T1	A2A6T1	Cerebellar degeneration-related protein 2-like	Cdr2l
17.506	16.9928	18.7464	14.8344	16.7971	16.6995		3.6185	19.072	0	0.709881	-0.501151	A2A6U3;Q80UG5;A2A6U5	A2A6U3;Q80UG5;A2A6U5	Septin-9	2009-09-01
19.6391	17.7116	20.5126	20.5953	20.8927	20.7865		7.3669	22.3686	0	0.812015	2.16428	A2A7S7;Q91WQ3;F6VXZ2	A2A7S7;Q91WQ3	Tyrosine--tRNA ligase;Tyrosine--tRNA ligase, cytoplasmic;Tyrosine--tRNA ligase, cytoplasmic, N-terminally processed	Yars
19.8415	20.175	18.7834	18.2599	19.1222	18.1486		5.5481	20.7289	0	0.933842	-1.37281	A2A813;Q99LX0;A2A815;A2A817;A2A816	A2A813;Q99LX0;A2A815	Protein deglycase DJ-1	Park7
18.1829	18.3392	18.445	16.3525	17.9287	17.9216		3.8781	19.0765	0	1.29916	-0.335911	A2A8V8;A2A8V9;E9PUK6;Q52KI8;F6UK16;E9QKA4	A2A8V8;A2A8V9;E9PUK6;Q52KI8;F6UK16;E9QKA4	Serine/arginine repetitive matrix protein 1	Srrm1
18.7739	18.4751	21.0066	20.6591	20.5271	20.8315	+	100.96	22.3561	0	1.97458	2.05483	A2AAN2;Q8BMA6	A2AAN2;Q8BMA6	Signal recognition particle subunit SRP68	Srp68
18.9018	17.8041	16.2808	16.6271	18.8832	14.6798		2.1292	20.46	0	0.263932	-1.57142	A2ABZ2;Q922W5;Q922Q4	A2ABZ2;Q922W5;Q922Q4	Pyrroline-5-carboxylate reductase 1, mitochondrial;Pyrroline-5-carboxylate reductase 2	Pycr1;Pycr2
18.2699	16.671	24.7576	24.9142	24.6168	24.6999	+	323.31	26.3281	0	1.91444	7.18784	A2ACG7;Q9DBG6	A2ACG7;Q9DBG6	Dolichyl-diphosphooligosaccharide--protein glycosyltransferase subunit 2	Rpn2
17.203	17.4053	20.426	20.381	20.2964	16.2351		1.5167	21.8992	0.0031696	0.165676	0.961559	F6TBV1;F6WHL0;A2ADH1;Q9CQY5	F6TBV1;F6WHL0;A2ADH1;Q9CQY5	Magnesium transporter protein 1	Magt1
17.8944	17.5964	18.6913	18.7866	15.7519	18.469		4.4199	20.2844	0	0.162482	-0.634957	A2AE03;Q9QZD9	A2AE03;Q9QZD9	Eukaryotic translation initiation factor 3 subunit I	Eif3i
18.0744	18.9288	17.1993	18.1864	16.679	16.5164	+	13.016	20.15	0	1.31499	-1.90386	F6WHQ7;A2AE89;P10649;F6Y363;D3YZ29;E9PV63;D3YVP6;D3YX76;A2AE91;E9QAC8;D3YVP5;E9PVM7;Q8R5I6;Q80W21;P15626;P48774	F6WHQ7;A2AE89;P10649;F6Y363;D3YZ29;E9PV63;D3YVP6;D3YX76;A2AE91;E9QAC8;D3YVP5;E9PVM7;Q8R5I6;Q80W21;P15626;P48774	Glutathione S-transferase Mu 1;Glutathione S-transferase Mu 7;Glutathione S-transferase Mu 2;Glutathione S-transferase Mu 5	Gstm1;Gm6665;Gstm7;Gstm5;Gstm2;Gstm4
22.2444	22.1046	21.0754	21.2318	21.488	20.9652		11.973	23.6297	0	1.13845	-0.947905	A2AEX8;A2AEX6;P97447;A2AEX7;A2AEY1;A2AEY2;A2AEX9;A2AEY0	A2AEX8;A2AEX6;P97447;A2AEX7;A2AEY1;A2AEY2	Four and a half LIM domains protein 1	Fhl1
20.2674	20.3834	16.9037	16.5396	17.5338	17.2168	+	5.213	19.232	0	2.48719	-2.95008	A2AFF6;O35638	A2AFF6;O35638	Cohesin subunit SA-2	Stag2
18.2539	17.7871	19.4489	16.6736	16.9992	18.7371		2.6062	20.4815	0	0.0549587	-0.152336	A2AGN7;B7ZCF1;O88685;F6Q2E3;A0A087WPH7	A2AGN7;B7ZCF1;O88685;F6Q2E3;A0A087WPH7	26S protease regulatory subunit 6A	Psmc3
17.9867	17.5033	17.659	18.9234	17.7172	16.4267		2.0326	19.508	0	0.364841	-0.67304	A2AH25;Q5FWK3	A2AH25;Q5FWK3	Rho GTPase-activating protein 1	Arhgap1
17.5926	17.7658	17.1345	16.8507	17.151	16.564		1.2727	16.547	0.0059835	0.938457	-0.821656	A2AI42;A2AI43;Q9CZF7;A2AI40;O88708	A2AI42;A2AI43;Q9CZF7;A2AI40;O88708	Origin recognition complex subunit 4	Orc4
18.2403	17.0847	17.3581	17.8495	16.5328	16.7455		1.3142	17.5083	0.005291	0.650446	-1.02339	A2AJ15	A2AJ15	Endoplasmic reticulum mannosyl-oligosaccharide 1,2-alpha-mannosidase	Man1b1
17.9872	17.7726	17.2027	15.9835	16.5266	18.691		7.8218	19.0695	0	0.0828256	-0.271154	A2AJ72;Q3TIX6;A0A0A6YVV5;A0A0A6YX76;A2AJ71;A0A0A6YY39;F7AM43	A2AJ72;Q3TIX6;A0A0A6YVV5		Fubp3
18.1556	17.5038	20.2267	20.323	17.2652	15.857		51.329	21.3994	0	0.613221	-1.2686	Q8CBM2;A2AL85;Q8BSY0;A2AL71;A2AL77;A2AL83;A2AL79;Q9CR06;Q6P8S1;A2AL74;A2AL78;A2AL76;A2AL75;Q3TU40;A2AL81	Q8CBM2;A2AL85;Q8BSY0	Aspartyl/asparaginyl beta-hydroxylase	Asph
22.1281	21.1492	19.6245	16.8507	20.2257	20.0389		30.66	21.2792	0	1.02598	-1.50639	A2ALF0;A2ALF3;Q6NZB0;F7CXJ2;F6TQL3	A2ALF0;A2ALF3;Q6NZB0;F7CXJ2;F6TQL3	DnaJ homolog subfamily C member 8	Dnajc8
17.8971	19.5466	16.8056	15.1885	17.9101	16.7455		40.022	18.0263	0	0.520872	-1.39406	A2ALR8;A2ALR9;Q3V0C5	A2ALR8;A2ALR9;Q3V0C5	Ubiquitin carboxyl-terminal hydrolase 48	Usp48
17.6247	18.1618	15.7789	17.0546	18.0497	15.0425		2.867	16.7899	0	0.327158	-1.34716	A2AM62	A2AM62		Hp1bp3
18.1146	17.6827	16.6896	16.3035	17.3602	17.706		2.2953	19.2674	0	0.498587	-0.365577	A2AMV1;Q9D0I8;D6RCI7	A2AMV1;Q9D0I8;D6RCI7	mRNA turnover protein 4 homolog	Mrto4
19.8756	19.6004	19.0751	19.0872	19.0968	19.2023		2.2551	21.1282	0	1.24131	-0.58838	A2AMW0;F7CAZ6;P47757	A2AMW0;F7CAZ6;P47757	F-actin-capping protein subunit beta	Capzb
18.2087	17.4082	17.0042	16.6258	21.767	16.9544		1.4975	23.6735	0.0031447	0.229392	1.55226	A2ANX3	A2ANX3	Phospholipid-transporting ATPase	Atp8b4
17.6411	17.1189	17.7095	17.8479	16.1959	17.2007		1.2664	19.8473	0.0074627	0.45372	-0.681687	A2AP32;Q3UIU2	A2AP32;Q3UIU2	NADH dehydrogenase [ubiquinone] 1 beta subcomplex subunit 6	Ndufb6
17.6599	17.6391	17.1533	17.414	20.1221	16.1849		1.5827	21.761	0.0032129	0.0851989	0.503994	A2AP78;O54879	A2AP78;O54879	High mobility group protein B3	Hmgb3
21.5419	21.4915	16.546	16.8484	16.9504	16.5151	+	18.57	20.054	0	2.67967	-4.78391	A2APB8	A2APB8	Targeting protein for Xklp2	Tpx2
18.4349	17.7391	16.5399	17.915	17.1468	18.7995		1.6025	19.8915	0.0032336	0.0406851	-0.113851	A2APX3;P21460	A2APX3;P21460	Cystatin-C	Cst3
19.4647	17.1363	17.2655	15.6232	20.8841	17.7672		1.6627	22.5997	0.000819	0.186533	1.02513	E9Q8N1;E9Q8K5;A2ASS6;A2AT70;F7CR78	E9Q8N1;E9Q8K5;A2ASS6	Titin	Ttn
21.1041	20.83	20.3499	20.1718	20.4871	20.0802		28.072	21.8166	0	0.965408	-0.683417	A2ATU9;Q8BY71	A2ATU9;Q8BY71	Histone acetyltransferase type B catalytic subunit	Hat1
18.6458	18.42	17.7888	17.7915	17.5768	17.7025	+	3.0956	19.6821	0	1.69282	-0.89325	A2AU61;A2AU62;Q64012;A2AU60	A2AU61;A2AU62;Q64012	RNA-binding protein Raly	Raly
17.234	17.1563	17.899	17.5586	17.3427	17.3226		5.0877	18.1287	0	1.12113	0.137513	A2AUM6;P16254	A2AUM6;P16254	Signal recognition particle 14 kDa protein;Signal recognition particle 14 kDa protein, N-terminally processed	Srp14
28.0639	28.0999	30.392	30.3132	30.238	30.1946	+	323.31	31.8898	0	3.75871	2.1344	A2AVJ7;Q99PL5	A2AVJ7;Q99PL5	Ribosome-binding protein 1	Rrbp1
25.4203	25.6891	22.3078	22.523	23.2316	23.4951	+	198.72	25.1347	0	2.13697	-2.19132	A2AW05;Q08943	A2AW05;Q08943	FACT complex subunit SSRP1	Ssrp1
17.0609	17.9793	18.0361	18.0607	17.0511	16.7431		2.3054	17.7195	0	0.485299	-0.622981	A2AWN8;P59326	A2AWN8;P59326	YTH domain-containing family protein 1	Ythdf1
21.2075	19.9608	25.3152	25.3271	25.0569	25.2068	+	152.27	26.8013	0	1.7321	4.54766	A2AWT6;A2AWT7;A2AWT5;P25976;E9Q4A8;G3UZW9	A2AWT6;A2AWT7;A2AWT5;P25976	Nucleolar transcription factor 1	Ubtf
17.735	19.0729	18.5469	16.2828	16.621	17.8358		6.1007	20.2088	0	0.490836	-1.17555	A2BDX2;O70152	A2BDX2;O70152	Dolichol-phosphate mannosyltransferase subunit 1	Dpm1
23.1509	23.295	21.6689	20.9306	21.9687	21.8563	+	29.448	23.5092	0	2.31615	-1.31047	A2BE93;Q9EQU5;A2BE92	A2BE93;Q9EQU5;A2BE92	Protein SET	Set
18.2967	16.7039	19.5779	19.3942	17.3279	19.1989		11.472	20.8293	0	0.223392	0.763103	A2BFF8;Q3TPJ8;A2BFF5;A2BFF9;O88487	A2BFF8;Q3TPJ8;A2BFF5;A2BFF9;O88487	Cytoplasmic dynein 1 intermediate chain 2	Dync1i2
18.2928	16.5202	17.3588	17.0826	17.0516	15.6674		1.5738	18.3065	0.0032051	0.346668	-1.04696	A2BGN7;Q9D8X0	A2BGN7;Q9D8X0	Protein MANBAL	Manbal
17.7938	17.236	21.3208	21.5496	21.167	21.0652	+	5.8055	22.8527	0	2.21168	3.6012	Q91YZ8;A3KFU5;A3KFU8;Q6PHQ9;V9GXG3;A0A0A6YWT2;G5E8X2	Q91YZ8;A3KFU5;A3KFU8;Q6PHQ9	Polyadenylate-binding protein	Pabpc4
23.5084	23.956	16.215	16.5272	21.3864	21.2182	+	76.52	22.872	0	2.02046	-2.42989	A3KG93;Q6ZQ88;G8JL40;F6Z4I3;F6ZC60	A3KG93;Q6ZQ88;G8JL40;F6Z4I3	Lysine-specific histone demethylase 1A	Kdm1a
19.0864	18.7364	16.9562	16.764	16.3802	17.9974		2.5401	19.1705	0	0.762505	-1.72255	A3KGL9;F6W687;P09602;Q5XK38;J3QM43;B7ZCQ3	A3KGL9;F6W687;P09602;Q5XK38;J3QM43;B7ZCQ3	Non-histone chromosomal protein HMG-17	Hmgn2;Gm6594
17.7344	17.8325	17.1491	16.5994	17.2354	17.6067		1.1207	19.2575	0.0094067	0.699622	-0.362388	Q6PGJ8;A3KGR9;Q9D8V0	Q6PGJ8;A3KGR9;Q9D8V0	Minor histocompatibility antigen H13	H13;Hm13
18.5586	17.8283	17.3416	16.179	16.9533	19.1701		6.2691	19.2831	0	0.0360128	-0.131748	A3KGU5;A3KGU7;E9Q447;A3KGU9;P16546	A3KGU5;A3KGU7;E9Q447;A3KGU9;P16546	Spectrin alpha chain, non-erythrocytic 1	Sptan1
18.2937	17.4277	17.0551	15.0917	16.6561	15.4879		2.4129	16.0898	0	0.876009	-1.78872	B0QZI1;Q5NCT0;Q3V3P1;O70157	B0QZI1;Q5NCT0;Q3V3P1;O70157	DNA topoisomerase;DNA topoisomerase 3-alpha	Top3a
18.5815	19.6809	16.6326	16.0561	17.1907	16.1637	+	1.2842	19.5753	0.0060015	1.08357	-2.45403	B0V2V6;B0V2V8;Q3UH70;Q8K2F0;Q9ESU6	B0V2V6;B0V2V8;Q3UH70;Q8K2F0;Q9ESU6	Bromodomain-containing protein 3;Bromodomain-containing protein 4	Brd4;Brd3
17.81	17.2985	17.327	16.3892	17.2934	16.9632		15.339	17.3992	0	0.527761	-0.425977	H3BKL8;B1AQF4;Q9D7X3	H3BKL8;B1AQF4;Q9D7X3	Dual specificity protein phosphatase 3	Dusp3
18.3683	17.2354	17.0556	18.1874	16.674	16.9831		4.231	19.4829	0	0.621153	-0.973326	B1ASE2;Q9DCX2	B1ASE2;Q9DCX2	ATP synthase subunit d, mitochondrial	Atp5h
18.6677	18.1106	17.2362	17.1361	16.6945	17.7727		1.9856	19.0435	0	0.705138	-1.15554	Q3TRH2;B1AT36;Q9D8W5	Q3TRH2;B1AT36;Q9D8W5	26S proteasome non-ATPase regulatory subunit 12	Psmd12
18.3021	17.8293	19.2242	19.4888	19.2744	18.6692		18.475	20.7629	0	0.847021	0.906143	B1AU25;Q9Z0X1	B1AU25;Q9Z0X1	Apoptosis-inducing factor 1, mitochondrial	Aifm1
21.4686	21.2774	16.9591	16.5471	19.5734	19.6722	+	8.7512	20.9007	0	2.42471	-1.75022	B1AU75;Q99MD9;B1AU76	B1AU75;Q99MD9;B1AU76	Nuclear autoantigenic sperm protein	Nasp
19.1559	19.5828	16.6671	15.904	17.5402	16.4141	+	2.2168	17.8799	0	1.23723	-2.3922	B1AUX2;Q61191	B1AUX2;Q61191	Host cell factor 1;HCF N-terminal chain 1;HCF N-terminal chain 2;HCF N-terminal chain 3;HCF N-terminal chain 4;HCF N-terminal chain 5;HCF N-terminal chain 6;HCF C-terminal chain 1;HCF C-terminal chain 2;HCF C-terminal chain 3;HCF C-terminal chain 4;HCF C-terminal chain 5;HCF C-terminal chain 6	Hcfc1
18.8363	18.135	17.1923	17.8849	18.664	16.6567		5.8609	18.6277	0	0.284972	-0.82527	B1AV14;Q78IK4	B1AV14;Q78IK4	MICOS complex subunit Mic27	Apool
19.2344	17.3157	17.2931	15.8975	16.2297	17.9717		5.7025	20.4081	0	0.336824	-1.17435	B1AWD6;Q9CYL5	B1AWD6;Q9CYL5	Golgi-associated plant pathogenesis-related protein 1	Glipr2
17.7995	17.9086	20.3805	20.1783	16.0408	16.4881	+	1.4968	21.4577	0.0031422	1.69188	-1.58959	B1B1E2;Q8CG19	B1B1E2;Q8CG19	Latent-transforming growth factor beta-binding protein 1	Ltbp1
18.0691	18.2265	16.6847	16.198	16.7764	16.0573	+	1.2228	15.8567	0.008843	1.37296	-1.73092	B2FDG7;Q99N87	B2FDG7;Q99N87	28S ribosomal protein S5, mitochondrial	Mrps5
24.1898	24.258	23.7488	23.7132	23.9448	23.8824		246.37	25.6543	0	1.66744	-0.310279	B2M1R6;P61979;H3BLL4;H3BKD0;A0A286YDM3;H3BK96;H3BKI8;A0A286YCM2;A0A286YEC4;Q8BT23;A0A286YDH1;H3BLP7;H3BJ43;A0A286YE41;H3BJS9	B2M1R6;P61979;H3BLL4;H3BKD0;A0A286YDM3;H3BK96	Heterogeneous nuclear ribonucleoprotein K	Hnrnpk
17.2423	17.8382	16.7048	16.6659	17.3893	19.3435		11.084	20.8507	0	0.297956	0.826191	D3Z5B1;B2RPU8;Q9D1L0	D3Z5B1;B2RPU8;Q9D1L0	Coiled-coil-helix-coiled-coil-helix domain-containing protein 2	Zbed5;Chchd2
17.6811	18.4055	18.9338	18.3685	17.3851	17.7811		3.085	19.9948	0	0.419205	-0.460224	E9QAI5;G3UWN2;B2RQC6;E9QAT6	E9QAI5;G3UWN2;B2RQC6;E9QAT6	CAD protein;Glutamine-dependent carbamoyl-phosphate synthase;Aspartate carbamoyltransferase;Dihydroorotase	Cad
19.2126	18.6118	17.5356	17.3368	16.8406	14.9434	+	6.5544	17.4253	0	1.02889	-3.02013	F7CVW0;B2RRI2;Q689Z5;Q3TMM7;A0A1W2P6Y8;A0A0G2JGC7;A0A0G2JEM3;A0A1W2P7W8;Q7TNB8	F7CVW0;B2RRI2;Q689Z5;Q3TMM7;A0A1W2P6Y8;A0A0G2JGC7;A0A0G2JEM3;A0A1W2P7W8;Q7TNB8	Protein strawberry notch homolog 1;Protein strawberry notch homolog 2	Sbno1;Sbno2
23.1888	23.0786	22.2758	22.5454	22.3906	22.655		101.95	24.2419	0	1.29408	-0.610927	B2RXM2	B2RXM2		Gm6793
25.251	25.2576	26.3635	26.2544	26.3767	26.3378	+	323.31	28.0248	0	3.49522	1.10298	B7FAU9;Q8BTM8;B7FAV1;F6XC15;J3JS91;F6Z2C0	B7FAU9;Q8BTM8;B7FAV1	Filamin-A	Flna
18.3775	18.8283	18.6396	15.3474	16.7758	15.9315	+	5.2236	15.6267	0	1.37254	-2.24931	V9GXM6;F6R587;B7ZCP4;Q8C166	V9GXM6;F6R587;B7ZCP4;Q8C166	Copine-1	Cpne1
17.7593	17.3045	16.2482	19.6025	17.6752	16.2727		6.2922	19.5072	0	0.277247	-0.557963	B7ZNL2;Q78ZA7;A0A140LJ37	B7ZNL2;Q78ZA7;A0A140LJ37	Nucleosome assembly protein 1-like 4	Nap1l4
18.0409	17.5908	16.0627	17.482	17.3861	17.0379		1.4833	15.4892	0.003125	0.774983	-0.603839	F6YCH1;B7ZP47;Q65Z40	F6YCH1;B7ZP47;Q65Z40	Wings apart-like protein homolog	Wapal
21.3062	20.9227	16.7853	16.7647	19.5533	19.822	+	3.0183	20.9062	0	1.58698	-1.42682	B8JJI9;F7CII1;D3YYP4;Q32NY6;P43135;Q60632;A0A140LJF1	B8JJI9;F7CII1;D3YYP4;Q32NY6;P43135;Q60632;A0A140LJF1	COUP transcription factor 2;COUP transcription factor 1	Nr2f1;Nr2f2
22.9977	22.5728	22.0823	21.9045	22.3469	22.4173		133.5	24.0612	0	0.694543	-0.403182	B8JK33;B8JK32;Q9D0E1;F6W322	B8JK33;B8JK32;Q9D0E1	Heterogeneous nuclear ribonucleoprotein M	Hnrnpm
21.5977	21.5633	17.3874	15.5535	17.7002	16.4345	+	2.2943	19.7215	0	1.71863	-4.51317	B8JK51;Q8K015	B8JK51;Q8K015	Centromere protein O	Cenpo
18.8111	16.7128	17.3832	19.3307	16.8583	19.2222		2.2696	20.9264	0	0.0572896	0.278355	D3YWT0;D3Z569;D3YTS1;Q9R0P6	D3YWT0;D3Z569;D3YTS1;Q9R0P6	Signal peptidase complex catalytic subunit SEC11;Signal peptidase complex catalytic subunit SEC11A	Sec11a
17.9266	17.1788	21.1453	20.994	20.4187	20.6532	+	37.297	22.4117	0	1.77417	2.98325	D3YU17;Q8VCM8	D3YU17;Q8VCM8	Nicalin	Ncln
17.2182	17.9184	16.8484	16.3384	17.4676	17.0939		6.1341	19.5356	0	0.264376	-0.287512	D3YUG4;J3QP56;P97823	D3YUG4;J3QP56;P97823	Acyl-protein thioesterase 1	Lypla1
17.899	17.2618	19.2776	19.4663	19.445	15.7756		28.188	20.8267	0	0.00495874	0.0299001	D3Z3E8;E9PW39;D3YVL0;P23249	D3Z3E8;E9PW39;D3YVL0;P23249	Putative helicase MOV-10	Mov10
18.6972	18.3788	22.5475	22.5955	17.7942	20.9268		38.481	23.6609	0	0.184785	0.822547	D3YVW2;Q8BXA1;F6RUD1	D3YVW2;Q8BXA1	Golgi integral membrane protein 4	Golim4
17.6323	17.4395	16.7847	17.891	17.3952	15.769		6.1341	18.461	0	0.438634	-0.953817	D3YVZ9;P58059	D3YVZ9;P58059	28S ribosomal protein S21, mitochondrial	Mrps21
21.4629	21.0188	20.4317	19.4976	19.9552	19.9964	+	75.967	21.8035	0	1.52719	-1.26501	D3YWF6;Q7TQI3;D3Z7K0	D3YWF6;Q7TQI3;D3Z7K0	Ubiquitin thioesterase OTUB1	Otub1
18.4365	16.6871	18.0562	16.5427	17.9782	16.5562		32.876	18.9715	0	0.0871141	-0.294642	D3YX34;E9Q586;E9Q3M3;O08788	D3YX34;E9Q586;E9Q3M3;O08788	Dynactin subunit 1	Dctn1
18.9039	17.4102	17.6682	18.0076	18.4127	17.2435		1.1615	18.8569	0.0094683	0.118156	-0.328955	D3YXU1;Q99JY0	D3YXU1;Q99JY0	Trifunctional enzyme subunit beta, mitochondrial;3-ketoacyl-CoA thiolase	Hadhb
18.1573	18.9021	17.3843	16.7465	16.8468	17.3922		6.7796	17.2972	0	1.03376	-1.41017	D3YYD2;Q9D2L9	D3YYD2;Q9D2L9	Protein FAM111A	Fam111a
18.6199	18.2578	17.6928	18.8182	17.141	18.7253		8.4444	20.7491	0	0.223884	-0.505731	D3YYD5;D3Z645;Q9QZ88;D3YW98	D3YYD5;D3Z645;Q9QZ88;D3YW98	Vacuolar protein sorting-associated protein 29	Vps29
27.9778	28.5172	18.5011	18.0959	27.0377	27.1573	+	323.31	28.1843	0	1.27449	-1.14997	D3YZ08;O35144;E9QM06;F6VIR4	D3YZ08;O35144;E9QM06	Telomeric repeat-binding factor 2	Terf2
17.8366	17.127	16.8657	16.4432	16.958	16.6574		1.3328	19.5103	0.0053151	0.652973	-0.674083	D3YZ09;Q9CY66	D3YZ09;Q9CY66	H/ACA ribonucleoprotein complex subunit 1	Gar1
18.3307	17.981	17.4643	15.9958	16.2387	15.4166	+	5.5059	15.1516	0	1.45715	-2.32818	D3Z0S6;Q62189	D3Z0S6;Q62189	U1 small nuclear ribonucleoprotein A	Snrpa
17.3591	18.4773	22.1889	22.2857	22.4883	22.4143	+	76.445	23.9316	0	1.82576	4.53306	D3Z158;Q8BML9;A0A140LHZ5;A0A0A6YY08;A0A140LHJ3;A0A140LIS6;A0A140LJH1;A0A140LIN2;A0A140LHB3;A0A140LIR0;A0A140LJH2;A0A140LID3;A0A140LJK5;A0A140LHC3;F6TDS3;A0A140LII8;A0A140LIZ4	D3Z158;Q8BML9		Qars
17.3491	17.6844	19.0994	19.6592	19.1597	19.8126	+	22.69	21.8544	0	1.48132	1.96938	D3Z1Z8;D3Z5N2;P54227;P55821	D3Z1Z8;D3Z5N2;P54227;P55821	Stathmin;Stathmin-2	Stmn1;Stmn2
17.2146	18.1757	17.7852	16.7311	16.7176	15.7004		14.603	17.8032	0	0.775645	-1.48617	D3Z2H9;E9Q5J9;D3YVR0	D3Z2H9;E9Q5J9		Tpm3-rs7;Tpm3
19.0588	17.3439	17.3932	16.9425	17.4776	16.2207		1.5129	17.5281	0.0031646	0.479798	-1.35221	D3Z3F1;Q9D824	D3Z3F1;Q9D824	Pre-mRNA 3-end-processing factor FIP1	Fip1l1
18.3608	16.8368	17.9659	17.6376	16.8029	16.4299		1.2649	18.4355	0.0074571	0.472293	-0.982382	D3Z4N2;F8WIP8;P10923	D3Z4N2;F8WIP8;P10923	Osteopontin	Spp1
18.0736	16.8261	18.3927	16.4437	17.9507	17.7352		7.5853	19.78	0	0.223338	0.393073	D3Z6B9;Q8K009	D3Z6B9;Q8K009	Mitochondrial 10-formyltetrahydrofolate dehydrogenase	Aldh1l2
22.0491	21.8905	22.6693	22.6934	22.7512	22.9177	+	16.759	24.6764	0	1.76374	0.864656	D3Z6I8;E9Q7Q3;A0A0R4J1P2;P21107	D3Z6I8;E9Q7Q3;A0A0R4J1P2;P21107	Tropomyosin alpha-3 chain	Tpm3
17.9025	16.6834	22.7492	22.6974	21.9592	21.4284	+	38.543	23.9979	0	1.65622	4.40086	D3Z6S1;Q8BM55	D3Z6S1;Q8BM55	Transmembrane protein 214	Tmem214
17.1548	18.6419	16.8545	16.6349	16.9855	18.0516		74.573	19.4906	0	0.143653	-0.379745	E9QAT0;D3Z6U8;E9QNF5;Q6AXB7;P35922;E9QAS9;E9QAS8	E9QAT0;D3Z6U8;E9QNF5;Q6AXB7;P35922;E9QAS9;E9QAS8	Fragile X mental retardation protein 1 homolog	Fmr1
17.677	17.9006	17.1434	16.3415	16.2124	18.2849		25.285	18.1682	0	0.183139	-0.540126	D3Z6W2;Q06180	D3Z6W2;Q06180	Tyrosine-protein phosphatase non-receptor type;Tyrosine-protein phosphatase non-receptor type 2	Ptpn2
26.5535	27.3515	21.8272	21.5962	24.0256	23.897	+	122.83	26.2172	0	1.75022	-2.99118	H7BWX9;D3Z794;P61957;G3UZX6	H7BWX9;D3Z794;P61957	Small ubiquitin-related modifier 2	Sumo2
18.3983	17.5956	18.6717	18.0758	16.9554	16.6388		1.456	19.9938	0.003108	0.964024	-1.19985	D3Z7C6;Q9R0Q7	D3Z7C6;Q9R0Q7	Prostaglandin E synthase 3	Ptges3
17.6283	17.4139	16.2571	16.0323	17.8264	17.5991		32.059	19.2621	0	0.462463	0.191653	D6RE32;Q9JHP7	D6RE32;Q9JHP7	KDEL motif-containing protein 1	Kdelc1
18.8283	16.6198	16.7276	19.4559	16.6644	16.328		42.034	19.9479	0	0.413088	-1.22789	D6RE51;Q3TDN2	D6RE51;Q3TDN2	FAS-associated factor 2	Faf2
19.8356	17.1744	17.4741	16.5884	17.542	15.8696		4.7393	17.7517	0	0.430866	-1.7992	D6RIK7;P51943	D6RIK7;P51943	Cyclin-A2	Ccna2
18.6604	17.9404	19.4795	19.961	20.1609	20.1927	+	11.73	22.1816	0	1.45651	1.87641	E0CXB1;Q9QUM9	E0CXB1;Q9QUM9	Proteasome subunit alpha type-6	Psma6
17.9437	17.1227	16.8114	16.6952	21.6677	21.839	+	35.671	21.8986	0	2.01188	4.22017	E0CXE7	E0CXE7		Ctc1
18.6925	18.3971	18.8246	16.0509	18.052	16.623		17.54	20.2262	0	0.620146	-1.20731	E0CXY0;F6TLV3;Q8BX90	E0CXY0;F6TLV3;Q8BX90	Fibronectin type-III domain-containing protein 3A	Fndc3a
17.3217	19.5883	17.9389	16.0722	17.2372	16.3285		2.272	19.7967	0	0.516634	-1.67214	E0CXZ5	E0CXZ5		Samhd1
18.6315	18.2187	16.9907	16.952	17.7421	17.3673		2.252	19.081	0	1.05024	-0.870375	E0CYA9;Q9CQ36	E0CYA9;Q9CQ36	DNA polymerase epsilon subunit 4	Pole4
18.9099	17.4576	16.2312	17.9905	16.8873	18.3271		1.8041	19.6661	0.00083752	0.20092	-0.576599	E0CYQ2;Q9CQ48	E0CYQ2;Q9CQ48	NudC domain-containing protein 2	Nudcd2
17.0034	18.2528	16.9612	18.121	16.3663	16.9404		1.5259	17.2864	0.0031771	0.534648	-0.974779	E0CZ13;Q7TSG2	E0CZ13;Q7TSG2	RNA polymerase II subunit A C-terminal domain phosphatase	Ctdp1
18.0365	16.3783	17.8168	15.5887	16.3553	16.5245		1.5647	15.8147	0.0031974	0.342646	-0.767497	E0CZ72;P28740	E0CZ72;P28740	Kinesin-like protein;Kinesin-like protein KIF2A	Kif2a
21.5264	21.7605	16.6752	15.3923	16.2086	16.2238	+	28.254	20.8482	0	3.33077	-5.42723	E9PUA5;Q9QWT9;G3UXN2;G3UX22	E9PUA5;Q9QWT9;G3UXN2	Kinesin-like protein;Kinesin-like protein KIFC1	Kifc5b;Kifc1
19.2834	16.7971	18.2146	16.1575	18.2211	15.907		1.3267	19.344	0.005303	0.205194	-0.976212	E9PUC2;Q9CZW4;Q9QUJ7	E9PUC2;Q9CZW4;Q9QUJ7	Long-chain-fatty-acid--CoA ligase 3;Long-chain-fatty-acid--CoA ligase 4	Acsl3;Acsl4
23.3297	23.6686	19.993	20.0988	21.1115	20.9389	+	2.2786	23.1195	0	2.23229	-2.47394	E9PUM3;Q9WUB3;Q3UEJ6;Q8CI94;Q9ET01	E9PUM3;Q9WUB3	Alpha-1,4 glucan phosphorylase;Glycogen phosphorylase, muscle form	Pygm
18.1785	20.822	17.5374	16.795	17.4594	16.4767		1.2198	20.3624	0.0095729	0.668832	-2.5322	Z4YJU8;E9PUQ5;Q921M4	Z4YJU8;E9PUQ5;Q921M4	Golgin subfamily A member 2	Golga2
18.1669	18.188	18.0384	19.2373	18.327	16.5862		2.3606	20.4379	0	0.305649	-0.720822	E9PV22;Q505F5	E9PV22;Q505F5	Leucine-rich repeat-containing protein 47	Lrrc47
19.1904	16.4591	20.5459	20.1691	20.6118	20.411		49.535	21.9775	0	0.724043	2.68664	E9PVA8	E9PVA8		Gcn1l1
17.4547	17.5561	17.238	17.6389	17.1459	15.9261		1.2567	19.056	0.007446	0.59503	-0.969375	E9PVC5;E9Q770;A2AMI7;Z4YKC4;A0A0R4J112;A2AMI2;A0A0N4SVL0;Q80XI3	E9PVC5		Eif4g1
17.1772	18.8804	17.7339	16.7906	16.9407	15.948		1.6994	19.0942	0.00082237	0.603452	-1.58447	E9PVT8;Q61245	E9PVT8;Q61245	Collagen alpha-1(XI) chain	Col11a1
22.552	22.2142	16.8942	16.2243	18.7214	16.8492	+	34.823	21.0203	0	1.3954	-4.59778	E9PVX6	E9PVX6		Mki67
18.5968	17.707	16.3824	17.9508	16.9592	18.047		3.0033	19.8962	0	0.343612	-0.648788	E9Q0X0;E9PW69;Q9R1P0	E9Q0X0;E9PW69;Q9R1P0	Proteasome subunit alpha type;Proteasome subunit alpha type-4	Psma4
16.3771	21.0809	23.1194	23.2478	22.8686	23.1381		212.51	24.7007	0	0.675144	4.27432	Q3TT92;E9PWE8;Q62188;D3YUS0;D3Z567;Q6P1J1;P97427	Q3TT92;E9PWE8;Q62188	Dihydropyrimidinase-related protein 3	Dpysl3
17.5883	17.6946	16.3716	16.1568	16.1432	19.0654		22.119	19.7806	0	0.0078754	-0.0371618	E9PWG6	E9PWG6		Ncapg
18.4957	18.7816	16.2275	17.0924	16.7131	16.6267	+	14.192	17.1227	0	2.24352	-1.96875	E9PWW9;A0A0U1RPA7	E9PWW9;A0A0U1RPA7		Rsf1
16.7284	16.9383	18.2045	16.7917	19.3312	15.4526		16.746	20.7681	0	0.0965192	0.558542	E9PWY9;Q8C0C7;D6RIJ2	E9PWY9;Q8C0C7;D6RIJ2	Phenylalanine--tRNA ligase alpha subunit	Farsa
22.2133	22.149	17.4562	17.1184	17.5003	15.2513	+	6.03	20.7627	0	1.44906	-5.80535	F8WHY8;E9PX23;Q8K4B0;Q3U3A7;E9Q794;Q3UII8;Q924K8	F8WHY8;E9PX23;Q8K4B0	Metastasis-associated protein MTA1	Mta1
18.4534	16.6436	25.3978	25.2721	24.0111	23.9696	+	323.31	26.6422	0	1.71722	6.44184	E9PX70;Q60847;F6WIM8	E9PX70;Q60847	Collagen alpha-1(XII) chain	Col12a1
18.0088	18.1512	17.1483	16.2426	16.66	20.1431		2.4065	20.0226	0	0.0601492	0.321511	F8VPX1;E9PXY8;Q6A4J8	F8VPX1;E9PXY8;Q6A4J8	Ubiquitin carboxyl-terminal hydrolase;Ubiquitin carboxyl-terminal hydrolase 7	Usp7
21.8846	15.794	21.6917	21.6538	22.1906	22.2202		73.017	23.6885	0	0.415455	3.36613	F7CVJ5;E9PYB0;F7DBB3	F7CVJ5;E9PYB0;F7DBB3		Ahnak2
22.4508	22.1089	20.683	19.524	20.6902	20.2748	+	15.571	22.075	0	1.6641	-1.79735	E9PYD5;P10711;B7ZCS4;F6XMY4;Q9QVN7	E9PYD5;P10711	Transcription elongation factor A protein 1	Tcea1
18.6388	17.0802	18.3569	18.4314	17.9695	16.0353		2.6668	19.8073	0	0.25068	-0.857094	E9PYH2;Q91V12	E9PYH2;Q91V12	Cytosolic acyl coenzyme A thioester hydrolase	Acot7
20.6511	18.0438	20.6062	20.3346	20.8815	20.5719		13.294	22.1595	0	0.394004	1.37929	E9PYI8;Q9JMA1	E9PYI8;Q9JMA1	Ubiquitin carboxyl-terminal hydrolase;Ubiquitin carboxyl-terminal hydrolase 14	Usp14
22.2173	22.3301	24.082	23.9605	23.6866	23.8532	+	174.28	26.2706	0	2.34765	1.49619	E9PYL9;Q9CXW4;A2BH06	E9PYL9;Q9CXW4;A2BH06	60S ribosomal protein L11	Gm10036;Rpl11
18.8062	16.167	19.0654	19.3398	17.7862	16.6885		30.181	20.2215	0	0.0566953	-0.249233	E9PYT3;Q91YH5	E9PYT3;Q91YH5	Atlastin-3	Atl3
18.9062	17.9989	16.9649	16.8764	19.6278	16.6839		1.4956	19.0343	0.0031373	0.062961	-0.29668	E9Q4K9;E9PYU8;Q9CUN6	E9Q4K9;E9PYU8;Q9CUN6	E3 ubiquitin-protein ligase SMURF1	Smurf1
18.3773	17.2303	23.8012	23.6918	21.2842	21.3762	+	169.09	24.7983	0	1.59171	3.52639	E9PZ16;B1B0C7;Q05793	E9PZ16;B1B0C7;Q05793	Basement membrane-specific heparan sulfate proteoglycan core protein;Endorepellin;LG3 peptide	Hspg2
17.4754	18.3628	16.1633	17.2162	17.0041	16.1037		1.8753	17.2527	0	0.786746	-1.36516	E9PZ97;O88700	E9PZ97;O88700	Bloom syndrome protein homolog	Blm
19.1097	18.5966	18.2785	18.3801	18.1371	18.302		2.2534	20.782	0	0.844497	-0.633593	E9PZF0;Q01768;Q5NC79	E9PZF0;Q01768;Q5NC79	Nucleoside diphosphate kinase;Nucleoside diphosphate kinase B	Gm20390;Nme2;Nme1
18.3977	17.5268	16.573	16.8012	17.8213	16.0346		24.33	20.0313	0	0.390105	-1.0343	E9Q5H2;E9PZF5;P97822	E9Q5H2;E9PZF5;P97822	Acidic leucine-rich nuclear phosphoprotein 32 family member E	Anp32e
21.2543	21.016	22.136	22.2458	21.8793	22.2506		157.84	23.5784	0	1.28444	0.929834	E9Q035;P47758;A0A1W2P830	E9Q035;P47758	Signal recognition particle receptor subunit beta	Gm20425;Srprb
17.7065	18.1958	16.7231	17.4076	18.732	16.9931		6.0292	19.2576	0	0.0311388	-0.0885878	F6QYF8;E9Q039;Q11011;E9Q6F4	F6QYF8;E9Q039;Q11011;E9Q6F4	Puromycin-sensitive aminopeptidase	Npepps
17.9751	18.3736	17.4964	17.6959	16.3254	16.6851	+	16.655	19.3246	0	1.60395	-1.66913	E9Q0G1;Q9CQJ6	E9Q0G1;Q9CQJ6	Density-regulated protein	Denr
21.3778	18.4798	20.2258	20.9381	20.81	20.8207		30.508	22.3493	0	0.21972	0.886532	E9Q0U7;Q61699;D3Z027	E9Q0U7;Q61699	Heat shock protein 105 kDa	Hsph1
17.3331	17.9182	16.6709	17.9528	17.5908	17.0198		20.839	19.246	0	0.287968	-0.320359	E9Q9F5;E9Q1G8;O55131	E9Q9F5;E9Q1G8;O55131	Septin-7	2007-09-01
18.6575	18.7678	17.9574	17.8596	17.7547	16.1225		2.232	17.2123	0	0.789566	-1.77405	E9Q1L5;Q8BUH8	E9Q1L5;Q8BUH8	Sentrin-specific protease 7	Senp7
18.2239	16.9603	17.7773	16.2307	15.9781	18.9746		1.4067	20.7688	0.0038551	0.0224006	-0.115749	E9Q242;P54822	E9Q242;P54822	Adenylosuccinate lyase	Adsl
21.3071	20.9036	18.6927	19.2149	19.8648	20.2449		37.339	21.3828	0	1.19996	-1.05048	E9Q2X6;Q8CG47	E9Q2X6;Q8CG47	Structural maintenance of chromosomes protein;Structural maintenance of chromosomes protein 4	Smc4
17.5038	20.3433	19.7725	19.9369	19.8672	19.9488		6.7505	22.4462	0	0.251872	0.984426	G3UY29;E9Q3P9;F8WGS1;P62492;P46638;G3UZD3;G3UZL4;D3YYB3;Q9WTL2	G3UY29;E9Q3P9;F8WGS1;P62492;P46638;G3UZD3;G3UZL4	Ras-related protein Rab-11A;Ras-related protein Rab-11B	Rab11b;Rab11a
17.8774	17.9397	19.9441	19.8106	19.7631	19.9359	+	26.835	21.4135	0	2.65151	1.94096	E9Q3V6;P42208;F6WYM0;D3YYB1;D3Z3C0;F6UKN5;D3YZU7;D3Z1S1;D3YV76	E9Q3V6;P42208;F6WYM0;D3YYB1;D3Z3C0	Septin-2	2002-09-01
23.3145	23.0989	23.5135	23.3886	23.4207	23.3322		243.01	25.5042	0	0.549037	0.169798	E9Q450;Q8BP43;E9Q448;S4R2U0	E9Q450;Q8BP43;E9Q448;S4R2U0		Tpm1
17.6832	17.2057	17.009	16.5367	17.1054	16.7718		3.193	15.1314	0	0.648784	-0.505856	E9Q481;Q922R5;Q6P2K6	E9Q481;Q922R5;Q6P2K6	Serine/threonine-protein phosphatase 4 regulatory subunit 3B;Serine/threonine-protein phosphatase 4 regulatory subunit 3A	Smek1;Smek2
17.489	17.491	16.9839	15.5982	18.4661	17.12		1.5175	16.9839	0.0031721	0.157006	0.30307	E9Q5B9;G3X9F5;P98063;Q9WVM6;Q62381	E9Q5B9;G3X9F5;P98063;Q9WVM6;Q62381	Metalloendopeptidase;Bone morphogenetic protein 1;Tolloid-like protein 2;Tolloid-like protein 1	Tll2;Tll1;Bmp1
23.5448	23.1035	23.2999	23.3996	23.2887	23.2014		164.52	25.1016	0	0.119901	-0.0790739	E9Q616	E9Q616		Ahnak
17.0845	17.1582	17.8117	16.0963	17.2604	16.6947		17.159	16.1089	0	0.17764	-0.143757	I6L9G2;E9Q6L5;Q8BMG1;F6U6D4	I6L9G2;E9Q6L5;Q8BMG1;F6U6D4	ATR-interacting protein	Atrip
17.2595	16.8092	16.3422	16.8869	15.6335	17.316		5.0166	17.2286	0	0.231831	-0.559532	E9Q6Q4;Q3TU36;E9Q912	E9Q6Q4;Q3TU36;E9Q912		Rap1gds1
18.0235	17.7552	17.7463	16.1851	17.2477	16.8596		13.614	18.8215	0	1.14713	-0.835703	E9Q6U4;Q3UWL8	E9Q6U4;Q3UWL8	Prefoldin subunit 4	Pfdn4
21.049	20.9132	20.2384	19.9634	20.9107	20.7307		86.796	22.1771	0	0.53641	-0.160373	E9Q715;Q05CX5;Q7TNC4	E9Q715;Q05CX5;Q7TNC4	Putative RNA-binding protein Luc7-like 2	Luc7l2
17.3231	16.9904	22.2173	22.1365	21.5943	21.76	+	134.6	23.4793	0	2.77317	4.52032	E9Q7B0	E9Q7B0		P4ha1
21.2125	21.0102	16.001	17.9906	19.4594	19.155	+	22.18	20.832	0	1.9954	-1.80418	E9Q7G0;A0A1B0GSW3;A0A1B0GT61;F6ZQA3	E9Q7G0;A0A1B0GSW3		Numa1
17.2587	18.5336	17.1085	17.379	18.3647	17.7791		4.6335	16.9281	0	0.0832619	0.175768	G3UZF0;E9Q8W9;Q91W36	G3UZF0;E9Q8W9;Q91W36	Ubiquitin carboxyl-terminal hydrolase;Ubiquitin carboxyl-terminal hydrolase 3	Usp3
21.6943	21.575	22.9212	22.9553	22.669	22.8231	+	123.85	24.5285	0	2.1193	1.11141	Q8VCQ8;E9QA16;S4R1T7;E9Q0M9;D3Z6I7;E9QA15;F6ZAW1;F6QLP8;F6RGN9;E9Q9F3;F6T2Z7	Q8VCQ8;E9QA16;S4R1T7;E9Q0M9;D3Z6I7;E9QA15		Cald1
17.834	17.7653	18.4452	16.375	16.4705	16.1103	+	4.5146	17.0962	0	1.84046	-1.50923	E9QAE3	E9QAE3		Btaf1
18.1738	17.3872	17.2608	15.5707	16.1677	19.6577		1.2318	20.5827	0.0088692	0.0232726	0.132171	E9QAQ5;Q9WV60	E9QAQ5;Q9WV60	Glycogen synthase kinase-3 beta	Gsk3b
25.0353	24.8557	16.0537	16.4716	20.2307	20.2401	+	207.15	23.7712	0	3.43877	-4.71013	E9QAS4;E9QAS5;Q6PDQ2;E9PYU4;E9PYL1;A2A8L1;F6WR45;F7C528;E9Q614;B1AR17;F6V4V3	E9QAS4;E9QAS5;Q6PDQ2	Chromodomain-helicase-DNA-binding protein 4	Chd4
18.5381	16.9747	21.4078	21.206	21.1389	21.2154	+	52.066	22.829	0	1.31371	3.42075	E9QB02;Q68FL6;F6W0G8	E9QB02;Q68FL6;F6W0G8	Methionine--tRNA ligase, cytoplasmic	Mars
23.9078	24.2686	17.2482	16.3437	17.7168	16.4238	+	49.579	22.6296	0	2.04459	-7.01793	E9QK89;Q5PSV9	E9QK89;Q5PSV9	Mediator of DNA damage checkpoint protein 1	Mdc1
17.857	16.5452	18.3456	18.1954	15.2946	15.4622		4.3103	18.1144	0	0.957527	-1.82268	E9QKZ2;Q91YE6;E0CY46;E0CXB2;F6UT58;F6TLX3	E9QKZ2;Q91YE6;E0CY46;E0CXB2	Importin-9	Ipo9
18.5593	16.731	20.8285	20.3397	16.6164	15.9726		99.407	22.0511	0	0.525635	-1.35063	E9QMH7;Q9DBZ1	E9QMH7;Q9DBZ1	Inhibitor of nuclear factor kappa-B kinase-interacting protein	Ikbip
25.2603	25.2259	27.5669	27.6295	27.4745	27.5361	+	323.31	29.4554	0	3.61357	2.26219	E9QN08;Q80T06;P57776;A0A0R4J1E2;D3YUQ9;D3YZT9	E9QN08;Q80T06;P57776;A0A0R4J1E2;D3YUQ9;D3YZT9	Elongation factor 1-delta	Eef1d
18.3017	17.5424	20.7009	20.5012	21.1623	20.8616	+	57.002	22.3056	0	1.76908	3.08993	E9QN31;Q922K7	E9QN31;Q922K7	Probable 28S rRNA (cytosine-C(5))-methyltransferase	Nop2
16.8447	16.7986	20.2093	19.5495	19.0919	19.4646	+	16.075	21.4681	0	2.23713	2.45662	E9QN70;P02469	E9QN70;P02469	Laminin subunit beta-1	Lamb1
24.806	24.5574	23.5567	23.5219	23.55	23.8721	+	194.27	25.7881	0	1.38487	-0.970621	G5E8R3;E9QPD7;Q05920;A0A286YCC5	G5E8R3;E9QPD7;Q05920	Pyruvate carboxylase;Pyruvate carboxylase, mitochondrial	Pcx;Pc
21.3651	20.8041	16.4848	17.2497	17.6065	16.7825	+	39.748	19.8415	0	1.79532	-3.89008	E9QPI5;Q6A026;A0A0J9YV33	E9QPI5;Q6A026	Sister chromatid cohesion protein PDS5 homolog A	Pds5a
18.3254	16.7301	16.1873	17.806	15.6779	16.0635		5.933	17.7249	0	0.74257	-1.65702	E9QPX1;P39061	E9QPX1;P39061	Collagen alpha-1(XVIII) chain;Endostatin	Col18a1
20.0706	20.0523	22.1064	21.9716	21.6714	21.8006	+	139.11	24.0014	0	2.81965	1.67449	F2Z456;Q9DCN2;A0A0A0MQM3	F2Z456;Q9DCN2;A0A0A0MQM3	NADH-cytochrome b5 reductase;NADH-cytochrome b5 reductase 3;NADH-cytochrome b5 reductase 3 membrane-bound form;NADH-cytochrome b5 reductase 3 soluble form	Cyb5r3
17.8691	17.3411	17.7092	16.0409	17.5604	17.2867		1.215	17.0484	0.0095588	0.219186	-0.181511	F2Z4B3;O35207;Q9CPY4;G3UYI1	F2Z4B3;O35207;Q9CPY4;G3UYI1	Cyclin-dependent kinase 2-associated protein 1;Cyclin-dependent kinase 2-associated protein 2	Cdk2ap1;Cdk2ap2
21.2534	17.702	23.0351	23.5505	23.0092	23.1058		6.0596	25.568	0	0.741264	3.57982	F6QL70;Q5M8M8;P47915;W4VSN7;A0A1L1SS27;A0A1L1SUN1;A0A1L1STJ3	F6QL70;Q5M8M8;P47915;W4VSN7;A0A1L1SS27	60S ribosomal protein L29	Gm17669;Rpl29;Gm3550
22.9372	22.408	24.333	24.11	24.1472	24.2397	+	87.544	26.5793	0	1.5256	1.52079	F6SVV1;P62082	F6SVV1;P62082	40S ribosomal protein S7	Gm9493;Rps7
16.7507	18.0888	18.6378	18.955	17.0753	18.5131		20.152	20.8835	0	0.130928	0.374384	F6USD5;F6T4L3;Q80ZP8;Q3TMX5;Q9CXI5;F7C1S6	F6USD5;F6T4L3;Q80ZP8;Q3TMX5;Q9CXI5;F7C1S6	Mesencephalic astrocyte-derived neurotrophic factor	Manf
19.0741	17.3656	19.0301	16.9538	17.7627	16.2581		10.068	19.634	0	0.398677	-1.20944	F6TQS9;Q3UVK0	F6TQS9;Q3UVK0	Endoplasmic reticulum metallopeptidase 1	Ermp1
17.7043	18.1114	15.3296	17.4843	17.9454	17.2419		5.7095	18.6799	0	0.283776	-0.314211	F6TVP2;Q60710;E9PYG9	F6TVP2;Q60710;E9PYG9	Deoxynucleoside triphosphate triphosphohydrolase SAMHD1	Samhd1
18.4806	17.8378	16.6281	16.6368	18.0545	20.4689		55.444	21.5193	0	0.327367	1.10252	F6V084;Q8VBT0	F6V084;Q8VBT0	Thioredoxin-related transmembrane protein 1	Tmx1
17.3304	16.2905	17.6007	18.9632	17.4774	15.4342		4.903	20.3152	0	0.104417	-0.354645	Q8BPI2;F6V6T4;Q9R0Q3	Q8BPI2;F6V6T4;Q9R0Q3	Transmembrane emp24 domain-containing protein 2	Tmed2
16.3333	17.8629	15.7062	17.162	16.4931	15.0003		1.5519	17.551	0.0031822	0.476989	-1.35143	F6VVY4;Q8JZU2	F6VVY4;Q8JZU2	Tricarboxylate transport protein, mitochondrial	Slc25a1
17.3239	20.8104	21.0898	20.8612	20.7128	20.3413		102.87	22.7786	0	0.307505	1.45989	F6YY69;F6VW30;P68254	F6YY69;F6VW30;P68254	14-3-3 protein theta	Ywhaq
21.5344	21.7593	17.5555	16.2728	17.4996	16.2261	+	4.4351	20.3808	0	1.75	-4.78402	F6XU43	F6XU43		Zfp827
21.4829	21.3821	24.3063	24.4113	24.224	24.1827	+	147.49	26.6625	0	3.41317	2.77082	F6YVP7;P62270;S4R1N6;A0A1Y7VKY1	F6YVP7;P62270;S4R1N6;A0A1Y7VKY1	40S ribosomal protein S18	Gm10260;Rps18
20.9938	21.1634	17.0789	20.3344	20.2535	20.0346	+	15.805	21.9222	0	1.67239	-0.934566	Q7M739;F6ZDS4;F6RX08	Q7M739;F6ZDS4	Nucleoprotein TPR	Tpr
23.3102	23.6259	21.6645	21.8682	22.3212	22.3424	+	80.235	24.0602	0	1.72499	-1.13623	F6ZV59;G5E8G0;G3X9W0;Q60668;E9Q5B6;F6SHF3;F7A465	F6ZV59;G5E8G0;G3X9W0;Q60668;E9Q5B6;F6SHF3	Heterogeneous nuclear ribonucleoprotein D0	Hnrnpd
17.8186	20.7016	23.1314	22.2812	22.1714	22.4339		205.42	25.2389	0	0.768779	3.04254	Q6ZWZ6;F7AEH4;A0A1W2P7A1;P63323	Q6ZWZ6;F7AEH4;A0A1W2P7A1;P63323	40S ribosomal protein S12	Rps12
18.2769	16.1907	17.7542	18.6223	16.7453	17.1543		63.173	19.9724	0	0.0891776	-0.283978	F7CBP1;G3XA17;Q62448;F6TW20	F7CBP1;G3XA17;Q62448	Eukaryotic translation initiation factor 4 gamma 2	Eif4g2
17.9195	19.7267	17.9336	15.7308	17.0385	15.9158		1.2237	17.7426	0.0088496	0.80075	-2.34596	F7CJR1;Q9QWZ1	F7CJR1;Q9QWZ1	Cell cycle checkpoint protein RAD1	Rad1
16.959	18.6581	18.0409	15.7194	16.3378	17.9373		32.873	19.6238	0	0.20528	-0.670937	F7D1R5;P27612	F7D1R5;P27612	Phospholipase A-2-activating protein	Plaa
18.4273	17.2034	21.5486	21.5507	21.1488	20.8884	+	323.31	23.2284	0	1.44253	3.2032	F8VQC1;E9Q740	F8VQC1;E9Q740	Signal recognition particle subunit SRP72	Srp72
17.8784	18.0278	20.2302	20.2883	17.3099	16.8511		120.55	21.2972	0	1.16325	-0.872563	F8VQJ3;P02468;F6TLW1	F8VQJ3;P02468	Laminin subunit gamma-1	Lamc1
18.2337	16.8063	17.4739	15.5668	16.5241	18.7188		2.0742	20.1834	0	0.0244416	0.101459	F8WGG3;Q9JK81	F8WGG3;Q9JK81	UPF0160 protein MYG1, mitochondrial	Myg1
17.6746	15.7474	20.3537	20.2407	16.9318	17.3947		52.956	21.479	0	0.159322	0.452218	F8WHL2;Q8CIE6	F8WHL2;Q8CIE6	Coatomer subunit alpha;Coatomer subunit alpha;Xenin;Proxenin	Copa
18.2361	16.7994	19.4856	20.2746	18.8697	18.9687		27.577	21.2793	0	0.718949	1.40145	F8WHM5;Q61543;F6RSH1	F8WHM5;Q61543	Golgi apparatus protein 1	Glg1
18.7248	20.6063	16.507	17.6602	16.5079	16.5264	+	5.8296	18.7621	0	1.10305	-3.14839	F8WHS8;Q3U556;G3UWE3;Q8C5D8;O88907	F8WHS8;Q3U556;G3UWE3;Q8C5D8;O88907	E3 SUMO-protein ligase PIAS2;E3 SUMO-protein ligase PIAS1	Pias2;Pias1
23.0437	22.7747	19.8826	16.8679	20.7758	20.6575	+	24.147	22.3925	0	2.35051	-2.19257	F8WHU5;Q4VA53	F8WHU5;Q4VA53	Sister chromatid cohesion protein PDS5 homolog B	Pds5b
21.1066	17.3248	22.5816	22.4159	22.0354	22.4145		156.39	24.0798	0	0.594906	3.00922	F8WIT2;P14824	F8WIT2;P14824	Annexin;Annexin A6	Anxa6
21.4743	21.6682	22.0847	21.7499	22.0982	22.1423		63.007	23.863	0	1.50465	0.548968	F8WJK8;Q99L47;E9Q1V0	F8WJK8;Q99L47;E9Q1V0	Hsc70-interacting protein	St13
18.047	17.8115	17.4957	16.5419	16.0665	17.9079		20.255	18.4314	0	0.379904	-0.94199	G3UVV4;P17710;B4YB29;D3YYR4;D3Z365	G3UVV4;P17710;B4YB29;D3YYR4;D3Z365	Hexokinase;Hexokinase-1	Hk1
18.1267	19.5125	16.7548	16.3476	16.2575	17.0644		5.3118	17.6818	0	0.940436	-2.15866	G3UW82;Q5SX39;Q5SX40	G3UW82;Q5SX39;Q5SX40	Myosin-4;Myosin-1	Myh2;Myh4;Myh1
18.1753	17.4319	21.5076	21.4097	21.0371	21.4245	+	17.164	22.9822	0	1.83479	3.42715	G3UWE1;Q52L67;Q9CY27;A0A1D5RLH3;A0A1D5RLB4;Q3TAN8	G3UWE1;Q52L67;Q9CY27	Very-long-chain enoyl-CoA reductase	Tecr
22.2686	22.4535	19.1983	15.4988	19.3153	19.8804	+	10.107	21.5587	0	1.94398	-2.76323	G3UZ60;G3UWI9;G3UWX9;Q9Z172;G3UZA7	G3UZ60;G3UWI9;G3UWX9;Q9Z172;G3UZA7	Small ubiquitin-related modifier 3;Small ubiquitin-related modifier	Sumo3
16.9467	16.4119	17.0428	18.3986	17.0913	16.1534		18.267	20.3659	0	0.0335685	-0.0569439	G3UWN9;G3UXZ5;P97371	G3UWN9;G3UXZ5;P97371	Proteasome activator complex subunit 1	Psme1
17.5811	17.9712	16.3545	16.0916	16.327	17.8047		1.4962	19.0148	0.0031397	0.346089	-0.710348	G3UZJ2;G3UWW1;G3UZV6;Q80X35;Q80ZL4;Q3TLQ0;P20357	G3UZJ2;G3UWW1;G3UZV6;Q80X35;Q80ZL4;Q3TLQ0;P20357	Microtubule-associated protein;Microtubule-associated protein 2	Map2
21.8703	17.3883	22.8095	22.8956	22.6619	22.7212		212.99	24.7799	0	0.515448	3.06223	G3UX26;Q60930;A0A286YCR8;D3YZT5;D3YUN8	G3UX26;Q60930;A0A286YCR8;D3YZT5	Voltage-dependent anion-selective channel protein 2	Vdac2
21.6542	22.1504	17.3094	16.9104	16.2566	15.5981	+	9.7892	20.486	0	2.32538	-5.97491	G3UX50;Q3UKR0;O35613;G3UWI4;G3UWJ9	G3UX50;Q3UKR0;O35613;G3UWI4	Death domain-associated protein 6	Daxx
17.888	17.7656	16.5374	16.0363	16.8844	19.3823		24.668	21.111	0	0.0813507	0.306584	G3UX74;G3UY42;Q8CCS6	G3UX74;G3UY42;Q8CCS6	Polyadenylate-binding protein 2	Pabpn1
21.536	17.1718	21.4209	21.5729	21.4889	21.8493		2.9178	23.3214	0	0.396662	2.31523	G3UXT7;Q8CFQ9;P56959;G3UZD2;Q91VQ2	G3UXT7;Q8CFQ9;P56959;G3UZD2;Q91VQ2	RNA-binding protein FUS	Fus
21.5159	21.5651	20.9346	21.1174	21.152	21.3468		26.053	22.739	0	0.994199	-0.291101	G3UY38;G5E924;Q8R081;G3UY56	G3UY38;G5E924;Q8R081	Heterogeneous nuclear ribonucleoprotein L	Hnrnpl
16.4066	17.7681	18.0703	18.0994	17.2553	15.5864		9.6458	19.9687	0	0.222523	-0.666512	G3UYV7;P62858	G3UYV7;P62858	40S ribosomal protein S28	Rps28
17.851	18.2871	16.9379	17.3986	17.6528	19.7528		1.2451	20.5574	0.0081602	0.211532	0.633793	G3UYX5	G3UYX5	Regulator of G-protein signaling 22	Rgs22
18.0067	20.9811	16.5216	17.2079	19.9136	20.1716		16.721	21.3571	0	0.125826	0.548656	G3UZ44;P63013;Q9CY80;A2APZ7;Q06348	G3UZ44;P63013;Q9CY80;A2APZ7;Q06348	Paired mesoderm homeobox protein 1;Paired mesoderm homeobox protein 2	Prrx1;Prrx2
17.7945	18.9706	16.0879	16.3943	16.9096	15.4301		2.7573	16.9563	0	0.841571	-2.21272	G3X8Q0;O89090	G3X8Q0;O89090	Transcription factor Sp1	Sp1
18.8267	17.5673	16.948	16.745	16.6291	17.5749		13.084	19.0432	0	0.524474	-1.095	G3X8R0;Q60870	G3X8R0;Q60870	Receptor expression-enhancing protein;Receptor expression-enhancing protein 5	Reep5
18.3855	17.652	16.2755	17.2444	17.6759	17.6248		4.0535	19.7419	0	0.37484	-0.368423	S4R2R2;S4R2H5;S4R1Y5;G3X926;Q9JJ80	S4R2R2;S4R2H5;S4R1Y5;G3X926;Q9JJ80	Ribosome production factor 2 homolog	Rpf2
26.3121	26.218	23.0087	22.93	24.1557	24.2828	+	323.31	25.8198	0	2.82622	-2.04578	G3X956;Q920B9	G3X956;Q920B9	FACT complex subunit SPT16	Supt16;Supt16h
20.9729	20.7887	17.0946	15.6883	17.3948	16.7631	+	11.644	19.3441	0	2.13043	-3.80183	G3X963;Q8CDM1	G3X963;Q8CDM1	ATPase family AAA domain-containing protein 2	Atad2
17.55	17.7036	16.3438	19.1017	17.3902	16.4291		3.1585	20.1646	0	0.5552	-0.717174	G3X9B1;A0A1Y7VNI1	G3X9B1		Heatr1
17.449	16.3989	16.489	17.3008	15.8048	16.2301		7.79	18.8761	0	0.600844	-0.906472	G3X9I1;G5E911;Q91VU0;E9Q8C5;E9Q6F0	G3X9I1;G5E911;Q91VU0;E9Q8C5;E9Q6F0	Protein FAM3C	Fam3c
23.9375	24.1118	16.2747	17.1751	20.1405	19.5109	+	89.427	22.8321	0	2.22206	-4.199	G3X9W4;P49117;Q3ZAR9	G3X9W4;P49117;Q3ZAR9	Nuclear receptor subfamily 2 group C member 2	Nr2c2
17.0862	17.0726	16.8914	19.1728	17.4207	19.3698		7.7275	21.4038	0	0.509379	1.31585	G5E850;P56395;E0CY88	G5E850;P56395;E0CY88	Cytochrome b5	Cyb5a
17.7391	17.3985	17.2557	15.327	19.6229	15.3605		116.06	20.8381	0	0.0112203	-0.0771413	G5E8C4;Q8BRH0;A0A0R4J173	G5E8C4;Q8BRH0	Transmembrane and TPR repeat-containing protein 3	Tmtc3
18.8408	15.8253	17.6462	16.4997	15.7023	16.6095		1.3981	18.5719	0.0038491	0.273559	-1.17713	G5E8R2;E9Q453;E9Q456	G5E8R2;E9Q453;E9Q456		Tpm1
18.666	17.3591	16.9161	17.9152	18.2377	16.4465		3.1654	18.5236	0	0.216951	-0.670487	G5E8T3;Q9D104	G5E8T3;Q9D104		Srp19
24.8277	24.66	17.6689	16.6609	21.7519	21.8246	+	122.81	23.9667	0	3.02023	-2.95561	G5E8U2;Q505G8;F6ULU2;F6ZJ37;F6RU08	G5E8U2;Q505G8	Zinc finger protein 827	Zfp827;Znf827
17.8758	17.5245	17.3928	16.6477	16.743	20.9136		4.8908	22.4763	0	0.191232	1.12808	G5E902;Q8VEM8	G5E902;Q8VEM8	Phosphate carrier protein, mitochondrial	Slc25a3
19.427	17.2991	20.0207	20.1064	20.0259	20.1577		7.0555	21.6091	0	0.608502	1.72874	G8JL51;Q8K202	G8JL51;Q8K202	DNA-directed RNA polymerase I subunit RPA49	Polr1e
18.577	18.3954	15.8308	17.8097	18.4634	15.9678		1.3263	19.4486	0.005299	0.380192	-1.27063	H3BKM0;H3BIY9;Q9DBG3	H3BKM0;H3BIY9;Q9DBG3	AP complex subunit beta;AP-2 complex subunit beta	Ap2b1
18.9033	17.9269	17.4182	15.8392	17.5901	18.5128		3.1868	19.7375	0	0.192144	-0.363667	H3BJU7;H3BJX8;H3BJ45;H3BJ40;H3BKH9;Q60875;H3BJM4;H3BJ48;H3BLJ1;H3BIX8;H3BLF9;H3BJ59;H3BL15	H3BJU7;H3BJX8;H3BJ45;H3BJ40;H3BKH9;Q60875	Rho guanine nucleotide exchange factor 2	Arhgef2
22.8421	22.6844	21.2934	21.0612	21.5932	21.4843	+	22.407	23.171	0	2.21658	-1.22449	H3BJP2;H3BK43;H3BLJ9;H3BJL6;H3BKH6;Q9R0P3;H3BJC6;H3BL99	H3BJP2;H3BK43;H3BLJ9;H3BJL6;H3BKH6;Q9R0P3;H3BJC6	S-formylglutathione hydrolase	Esd
25.9355	26.2414	15.7301	15.5242	16.3349	16.8067	+	161.33	24.7158	0	3.0598	-9.51768	H3BK67;H3BK13;H3BL55;H3BKM3;H3BKF8;Q8BJA3;H3BJ31	H3BK67;H3BK13;H3BL55;H3BKM3;H3BKF8;Q8BJA3;H3BJ31	Homeobox-containing protein 1	Hmbox1
20.9306	20.473	18.8226	18.227	19.4498	19.211	+	30.493	20.7969	0	1.47318	-1.37138	H3BKN0;Q1HFZ0	H3BKN0;Q1HFZ0	tRNA (cytosine(34)-C(5))-methyltransferase	Nsun2
18.3858	17.0396	18.2208	17.1357	15.2468	19.9593		1.7913	21.6732	0.00083542	0.0139566	-0.109654	H3BKN6;Q61727	H3BKN6;Q61727	Interleukin-10 receptor subunit alpha	Il10ra
22.7497	23.5347	27.1756	27.3021	26.9085	26.9902	+	323.31	28.8379	0	1.97583	3.80714	H3BL37;O08784;H3BIX0;F6R3V4;H3BK88	H3BL37;O08784;H3BIX0;F6R3V4	Treacle protein	Tcof1
17.5629	16.9323	16.7524	14.616	16.3278	18.3819		2.122	20.4702	0	0.0316972	0.107209	H7BWZ3;Q9JM76	H7BWZ3;Q9JM76	Actin-related protein 2/3 complex subunit 3	Arpc3
20.9805	20.6262	17.5846	19.0765	24.0861	24.3027	+	87.131	24.4273	0	2.42855	3.39104	Q3TNS5;H7BX60;A0A3B2WCZ2;A0A3B2WCG4	Q3TNS5;H7BX60;A0A3B2WCZ2		Pot1b
20.4359	19.0809	18.6562	15.991	18.6846	18.7425		4.0475	20.6431	0	0.579605	-1.0449	H7BX95;Q6PDM2;F7AI47	H7BX95;Q6PDM2;F7AI47	Serine/arginine-rich splicing factor 1	Srsf1
20.0706	16.547	18.6644	19.2792	18.767	19.3281		77.265	20.9732	0	0.143272	0.738726	I7HJS1;O08579;Q3THM8;B7FAU5;D6RFS0	I7HJS1;O08579;Q3THM8;B7FAU5	Emerin	Emd
19.002	19.0861	23.4665	23.2821	23.2324	23.2894	+	108.45	25.9324	0	3.83822	4.21679	I7HLV2;Q6ZWV3;P86048;A0A1B0GXC3	I7HLV2;Q6ZWV3;P86048	60S ribosomal protein L10;60S ribosomal protein L10-like	Rpl10;Rpl10l
15.9462	17.2404	20.1065	17.0209	16.8677	20.8584		36.306	21.9854	0	0.406333	2.26973	J3QMG3;Q60931	J3QMG3;Q60931	Voltage-dependent anion-selective channel protein 3	Vdac3
18.2229	18.4104	16.3515	18.0269	17.3678	15.9111		1.4185	19.4341	0.0030936	0.82452	-1.67715	J3QP71;K3W4Q8;P18572	J3QP71;K3W4Q8;P18572	Basigin	Bsg
18.0885	18.2247	15.2827	21.5135	16.9778	17.3068	+	25.257	23.0457	0	1.53066	-1.01431	K3W4R2;Q6URW6;A0A140LI60	K3W4R2;Q6URW6	Myosin-14	Myh14
18.0143	18.9642	16.3446	15.0148	15.9296	17.1115		1.181	18.5153	0.009496	0.914357	-1.96869	M0QWF0;Q9JMD0	M0QWF0;Q9JMD0	BUB3-interacting and GLEBS motif-containing protein ZNF207	Zfp207;Znf207
18.0141	17.3856	16.875	16.973	17.5319	20.1859		1.3873	22.3145	0.0038402	0.314384	1.15911	M0QWU8;P31786	M0QWU8;P31786	Acyl-CoA-binding protein	Dbi
18.8454	19.0329	20.8368	20.3565	19.6882	19.8259	+	8.7983	21.8817	0	1.70685	0.817901	O08529	O08529	Calpain-2 catalytic subunit	Capn2
20.022	18.1302	20.3833	20.8179	20.467	20.5738		120.68	23.1324	0	0.573679	1.44429	O08547;E9Q6R3;A0A0G2JF08;D6RES2	O08547;E9Q6R3	Vesicle-trafficking protein SEC22b	Sec22b
18.6344	18.4767	22.335	22.3181	21.9425	22.259	+	63.577	23.7898	0	2.60601	3.54524	O08553	O08553	Dihydropyrimidinase-related protein 2	Dpysl2
17.6575	17.9272	17.3662	16.4683	16.9329	19.2195		116.99	20.7656	0	0.0818348	0.283824	O08583;G3X9I4;Q9JJW6	O08583;G3X9I4;Q9JJW6	THO complex subunit 4;Aly/REF export factor 2	Alyref;Alyref2
17.3975	17.0533	17.6318	17.1834	17.3206	16.278		37.723	18.918	0	0.28493	-0.426084	Q6GT24;O08709;A0A0A6YXQ7;D3Z0Y2;Q8BG37	Q6GT24;O08709;A0A0A6YXQ7;D3Z0Y2;Q8BG37	Peroxiredoxin-6	Prdx6;Prdx6b
19.8926	19.7427	19.8457	19.9486	19.2609	19.8009		30.012	21.5607	0	0.383186	-0.286717	O08749	O08749	Dihydrolipoyl dehydrogenase, mitochondrial	Dld
17.4521	15.3364	20.7122	20.9722	20.2397	20.2731	+	58.361	22.127	0	1.17049	3.86214	O08795	O08795	Glucosidase 2 subunit beta	Prkcsh
18.1377	17.7541	21.7078	21.9077	21.8492	21.7017	+	54.825	24.4522	0	2.54251	3.82953	O08807;B1AZS9	O08807;B1AZS9	Peroxiredoxin-4	Prdx4
18.2443	17.6114	16.9831	19.7053	19.6126	20.1245	+	89.936	21.8311	0	1.3843	1.94074	O09061;A0A338P7C0;A0A338P7F1	O09061;A0A338P7C0	Proteasome subunit beta type-1	Psmb1
22.5996	22.9345	17.5314	17.5816	19.4716	18.973	+	11.84	21.9371	0	2.14856	-3.54476	O09106	O09106	Histone deacetylase 1	Hdac1
20.4887	20.7931	22.4333	22.8306	22.5141	22.2252	+	169.43	24.5738	0	1.84107	1.72877	O35129;F6QPR1;F6Q8V7	O35129;F6QPR1	Prohibitin-2	Phb2
19.4091	17.5326	21.3717	21.1922	21.3205	21.2355	+	68.736	23.5032	0	1.01733	2.80717	O35134;A0A0U1RPX8;A0A0U1RPM9	O35134	DNA-directed RNA polymerase I subunit RPA1	Polr1a
22.7266	23.1332	20.1581	20.2604	21.6857	22.0452		86.152	23.2195	0	1.22708	-1.06442	Q497W9;O35286;A0A0G2JG10;A0A0G2JGQ5	Q497W9;O35286;A0A0G2JG10;A0A0G2JGQ5	Pre-mRNA-splicing factor ATP-dependent RNA helicase DHX15	Dhx15
18.2146	17.5324	15.9534	17.3734	16.7105	18.226		19.097	19.9734	0	0.17134	-0.405258	O35295	O35295	Transcriptional activator protein Pur-beta	Purb
17.3842	18.4152	17.5275	17.487	18.0927	17.1488		1.7128	19.2107	0.00082645	0.137635	-0.27894	O35344	O35344	Importin subunit alpha-4	Kpna3
22.028	21.9316	19.4665	19.6948	20.0821	20.8487	+	3.3443	22.4464	0	1.22671	-1.51439	O35381;F6UFG6;D3YYE1;D3Z7M9;Q64G17	O35381;F6UFG6;D3YYE1;D3Z7M9;Q64G17	Acidic leucine-rich nuclear phosphoprotein 32 family member A;Putative acidic leucine-rich nuclear phosphoprotein 32 family member C	Anp32a;Anp32c
23.7147	23.7147	22.1521	22.1448	22.0316	22.112	+	101.45	24.3527	0	3.22248	-1.64291	O35639;Q3TET3;A0A0G2JDV9;A0A0G2JGL7	O35639	Annexin A3	Anxa3
20.8828	20.9623	19.5101	19.5575	17.3232	19.6724		26.981	21.8816	0	0.756506	-2.42469	Q921D0;O35640	Q921D0;O35640	Annexin;Annexin A8	Anxa8
16.8135	18.1911	20.3866	20.2402	20.5281	20.1783	+	7.0414	21.9482	0	1.245	2.85091	O35685	O35685	Nuclear migration protein nudC	Nudc
18.0432	17.1537	16.939	16.8866	18.2652	15.5546		61.83	19.6697	0	0.169432	-0.688554	O35704	O35704	Serine palmitoyltransferase 1	Sptlc1
22.6065	22.7085	22.1193	22.1856	22.2761	22.5613		323.31	24.082	0	0.592474	-0.238817	Q8C2Q7;O35737	Q8C2Q7;O35737	Heterogeneous nuclear ribonucleoprotein H;Heterogeneous nuclear ribonucleoprotein H, N-terminally processed	Hnrnph1
18.5466	21.5225	17.3199	15.8628	17.8565	17.0779		49.708	20.5052	0	0.625228	-2.56736	O35841	O35841	Apoptosis inhibitor 5	Api5
18.5343	16.8775	22.9788	23.0197	21.0051	21.5733	+	137.36	24.0874	0	1.26069	3.58321	O35887;G3UWV3;G3V004;G3UWR0;G3UY49;G3UXA8;G3UXA3	O35887;G3UWV3;G3V004;G3UWR0	Calumenin	Calu
17.1606	16.9356	16.7205	16.9097	17.1168	18.2111		8.6766	20.1477	0	0.414386	0.615883	O54724	O54724	Polymerase I and transcript release factor	Ptrf
17.6525	17.6637	24.2474	24.0652	23.6267	24.0624	+	168.57	25.6326	0	2.907	6.18647	O54734	O54734	Dolichyl-diphosphooligosaccharide--protein glycosyltransferase 48 kDa subunit	Ddost
22.0974	22.1173	20.0477	16.1251	20.0458	20.3859	+	23.942	22.755	0	2.09637	-1.89152	O54962	O54962	Barrier-to-autointegration factor;Barrier-to-autointegration factor, N-terminally processed	Banf1
18.4864	17.7768	17.3225	18.6415	18.9435	15.1844		14.986	20.9001	0	0.198681	-1.06762	O55022	O55022	Membrane-associated progesterone receptor component 1	Pgrmc1
17.3678	19.0139	17.8463	16.4301	18.2114	16.3859		3.604	20.1098	0	0.264931	-0.892211	Q80ZJ2;Q924B0;O55023	Q80ZJ2;Q924B0;O55023	Inositol monophosphatase 1	Impa1
18.2525	17.7453	19.3461	19.2166	17.2039	19.6741		48.815	20.8887	0	0.118972	0.440101	O55029	O55029	Coatomer subunit beta	Copb2
18.4652	16.8635	19.7151	19.8685	19.96	19.7307		25.199	22.2193	0	0.941385	2.18105	O55135;A6PWZ2;D6RG53;D6RJJ3;B1AZQ4	O55135	Eukaryotic translation initiation factor 6	Eif6
18.0102	19.9485	21.1578	20.7378	20.8408	20.6872		19.316	23.4087	0	0.68232	1.78471	O55142	O55142	60S ribosomal protein L35a	Rpl35a
19.4154	18.6867	23.7663	23.8054	23.8551	23.8298	+	323.31	25.3911	0	2.24106	4.79136	O55143;Q8R429;B1ATS4;B1ATS5;E9Q559;Q64518	O55143	Sarcoplasmic/endoplasmic reticulum calcium ATPase 2	Atp2a2
18.0209	19.5583	17.1197	15.7012	17.2569	17.8361		2.6422	23.4307	0	0.569654	-1.24311	O55201	O55201	Transcription elongation factor SPT5	Supt5h
17.2767	16.2574	19.5728	19.7578	19.7397	19.8181	+	12.724	22.1125	0	1.55884	3.01186	O55234;Q8BTY5	O55234	Proteasome subunit beta type-5	Psmb5
24.7007	24.0842	17.2053	16.7124	19.8748	20.185	+	25.642	23.3411	0	2.20769	-4.36255	O70126;P97477	O70126	Aurora kinase B	Aurkb
16.9542	17.5633	17.2573	15.895	15.9162	18.5936		10.729	19.9799	0	0.000859035	-0.00383663	O70194;A0A2R8VK20	O70194;A0A2R8VK20	Eukaryotic translation initiation factor 3 subunit D	Eif3d
17.0794	17.5495	15.9403	16.3191	16.6085	16.5511		1.2762	16.2075	0.005988	1.04526	-0.734664	O70201	O70201	Baculoviral IAP repeat-containing protein 5	Birc5
22.2784	21.7322	23.23	23.489	22.5932	22.7357		128.54	25.1871	0	0.839749	0.659164	O70251;A0A087WS46;M0QWK5;M0QWH8;G3UX43;G3UZ47	O70251;A0A087WS46	Elongation factor 1-beta	Eef1b;Eef1b2
17.757	18.0979	16.6203	15.8781	16.9434	16.6936	+	2.0632	19.266	0	1.46289	-1.10897	O70326	O70326	Gremlin-1	Grem1
18.4572	18.642	19.0931	18.9608	19.0572	18.9668		9.2317	21.6044	0	1.33677	0.462414	O70378;M0QWY0;M0QWP2;M0QWS0;M0QWI7;M0QWE2;M0QWC9	O70378;M0QWY0;M0QWP2	ER membrane protein complex subunit 8	Emc8
21.7797	21.7203	20.6588	20.9882	21.0984	21.1689	+	23.216	23.428	0	2.25568	-0.616269	O70400;S4R1V0	O70400;S4R1V0	PDZ and LIM domain protein 1	Pdlim1
15.9815	18.0849	18.926	15.419	15.3268	18.8709		4.1837	20.5856	0	0.00989146	0.0656395	O70435;E0CZ34;F8WH02;E0CYL6	O70435;E0CZ34;F8WH02;E0CYL6	Proteasome subunit alpha type-3	Psma3
17.9706	18.8046	16.9493	15.6176	16.903	16.5375	+	1.3053	17.2788	0.005279	1.17306	-1.66738	O70445	O70445	BRCA1-associated RING domain protein 1	Bard1
22.2717	22.3549	20.1047	20.4738	17.0729	20.8453		18.438	22.4911	0	0.662742	-3.3542	O70475	O70475	UDP-glucose 6-dehydrogenase	Ugdh
18.1928	16.626	21.5159	21.4167	21.2339	21.436	+	138.98	23.3457	0	1.41814	3.92562	O70503	O70503	Very-long-chain 3-oxoacyl-CoA reductase	Hsd17b12
16.0485	17.1483	15.3612	16.485	18.3741	17.728		2.0504	19.6035	0	0.822609	1.45261	O70591	O70591	Prefoldin subunit 2	Pfdn2
18.1481	18.0339	22.9264	21.9886	21.2655	21.2337	+	9.2362	23.7477	0	3.45412	3.15863	O88207;A3KGE7	O88207	Collagen alpha-1(V) chain	Col5a1
21.5183	22.1477	16.9096	15.6899	16.8413	20.7331		18.545	21.5708	0	0.581151	-3.04579	O88271	O88271	Craniofacial development protein 1	Cfdp1
21.1209	21.6356	23.4571	23.7719	23.0334	22.9081	+	218.28	24.9693	0	1.57573	1.59252	O88342;A0A0J9YU05	O88342	WD repeat-containing protein 1	Wdr1
20.3995	16.8461	21.7827	21.7365	21.0515	21.2715		92.986	23.0833	0	0.537708	2.53871	O88477	O88477	Insulin-like growth factor 2 mRNA-binding protein 1	Igf2bp1
18.4424	17.7855	18.3095	15.6167	17.9678	15.7092		2.251	18.0809	0	0.4073	-1.27546	O88544	O88544	COP9 signalosome complex subunit 4	Cops4
24.1312	23.763	22.3502	22.4887	22.8817	22.7925	+	179.01	24.7538	0	1.55447	-1.11002	O88569;A0A0N4SUM2	O88569	Heterogeneous nuclear ribonucleoproteins A2/B1	Hnrnpa2b1
17.562	18.0114	18.1069	18.9175	19.1422	18.3036		24.228	21.0996	0	0.726003	0.93622	O89086;Q8BG13;S4R2M6	O89086;Q8BG13	RNA-binding protein 3	Rbm3
18.3606	17.5282	17.0766	20.1498	19.7306	19.9008	+	23.441	22.145	0	1.31993	1.87126	P00405	P00405	Cytochrome c oxidase subunit 2	Mtco2
18.0125	17.5396	16.849	16.2698	17.4863	17.58		1.2882	19.9693	0.006006	0.377029	-0.242847	P00493	P00493	Hypoxanthine-guanine phosphoribosyltransferase	Hprt1
18.8816	16.7493	17.9557	16.6556	16.5746	18.5243		5.1176	21.6805	0	0.0600362	-0.266001	P03930	P03930	ATP synthase protein 8	Mtatp8
22.9151	22.9481	24.6818	24.6893	24.2613	24.4259	+	223.21	26.2362	0	2.45398	1.41195	P05064;A6ZI44;Q9CPQ9;A6ZI46;D3Z510;A0A0U1RPN8;D3YWI1;D3YV98;A0A0U1RPT5;A6ZI47	P05064;A6ZI44;Q9CPQ9;A6ZI46;D3Z510;A0A0U1RPN8;D3YWI1	Fructose-bisphosphate aldolase A;Fructose-bisphosphate aldolase	Aldoa;Aldoart1
21.8657	16.4068	22.2744	22.3992	22.0014	21.9542		205.31	23.9444	0	0.390209	2.84154	P05202	P05202	Aspartate aminotransferase, mitochondrial	Got2
24.5834	25.2487	26.9947	26.9116	26.3624	26.6495	+	323.31	28.4149	0	1.31695	1.58995	P05213;A0A2R8VHF3	P05213;A0A2R8VHF3	Tubulin alpha-1B chain	Tuba1b
17.1796	16.5397	20.42	20.3485	20.3347	15.3865		85.527	21.7128	0	0.138434	1.00098	P06745;A0A0U1RQ18;A0A0U1RP97;CON__Q3ZBD7	P06745;A0A0U1RQ18	Glucose-6-phosphate isomerase	Gpi
23.5615	23.8822	24.9644	24.8826	24.7374	24.8567	+	323.31	26.8582	0	1.61259	1.07518	P07356;B0V2N7;B0V2N8;B0V2N5	P07356;B0V2N7;B0V2N8;B0V2N5	Annexin A2;Annexin	Anxa2
16.9726	17.2594	18.7131	17.0691	16.4643	17.0375		2.7714	19.8312	0	0.428699	-0.365094	P07742	P07742	Ribonucleoside-diphosphate reductase large subunit	Rrm1
23.874	23.6371	22.9608	22.9238	23.7301	23.8705		147.3	25.1593	0	0.110212	0.0447788	P07901;B7ZC50;A2A6A2;B7ZC49	P07901	Heat shock protein HSP 90-alpha	Hsp90aa1
21.0998	20.9564	25.587	25.9298	26.0304	25.9789	+	323.31	27.4449	0	3.63013	4.97654	P08113;F7C312	P08113;F7C312	Endoplasmin	Hsp90b1
17.525	18.003	20.6183	20.4628	16.0684	14.456	+	2.324	21.6211	0	1.01395	-2.50177	P08122	P08122	Collagen alpha-2(IV) chain;Canstatin	Col4a2
18.8903	18.6788	17.4827	17.5877	17.9017	17.8805	+	18.625	20.385	0	1.85849	-0.893472	P08207	P08207	Protein S100-A10	S100a10
24.2168	24.3706	22.7078	22.6469	22.7401	22.718	+	216.24	25.0398	0	2.60947	-1.5646	P08249;A0A0G2JF23;A0A0G2JGY4	P08249	Malate dehydrogenase, mitochondrial	Mdh2
17.0823	15.3738	16.587	19.1966	16.7809	15.8647		1.696	20.6208	0.00082169	0.0310287	0.0947475	P08752;A0A0A6YWA9;A2A610;A2AE31;A2AE32;Z4YKV1;Q66L47;P20612;Q9DC51;Q3V3I2;P50149;P18872;B2RSH2;Q8CGK7;P63094;Q6R0H7	P08752;A0A0A6YWA9	Guanine nucleotide-binding protein G(i) subunit alpha-2	Gnai2
18.1732	17.4862	20.5519	16.296	17.9832	16.9199		49.637	21.7474	0	0.214078	-0.378171	P09055	P09055	Integrin beta-1	Itgb1
19.3191	19.1167	25.6542	25.4395	24.3558	24.1394	+	323.31	26.6113	0	3.06228	5.02969	P09103;E9Q8G8	P09103	Protein disulfide-isomerase	P4hb
26.2179	26.1047	26.475	26.4151	26.6051	26.7389		323.31	28.3238	0	1.54966	0.510701	P09405;A0A087WRM5	P09405	Nucleolin	Ncl
24.9789	25.1933	25.309	25.3506	25.1285	25.2717		323.31	26.9998	0	0.328142	0.113989	P09411;S4R2M7;P09041	P09411;S4R2M7	Phosphoglycerate kinase 1;Phosphoglycerate kinase	Pgk1
23.694	23.9954	22.7326	23.1056	22.7546	22.8509	+	28.816	25.4734	0	1.65195	-1.04196	Q3THW5;P0C0S6;Q8R029;Q3UA95	Q3THW5;P0C0S6;Q8R029;Q3UA95	Histone H2A.V;Histone H2A.Z;Histone H2A	H2afv;H2afz
18.4456	18.1947	16.4787	17.0932	17.7924	14.8646		1.5945	17.1902	0.0032284	0.511411	-1.9917	P0DOV1	P0DOV1
25.2865	25.2858	23.9818	24.0182	24.2572	24.336	+	323.31	26.2775	0	2.8014	-0.989543	P10107	P10107	Annexin A1	Anxa1
26.5578	26.5709	29.0132	28.9868	28.6632	28.7587	+	279.38	30.5004	0	3.29748	2.14656	P10126;D3YZ68;D3Z3I8;P62631	P10126;D3YZ68;D3Z3I8	Elongation factor 1-alpha 1	Eef1a1
16.3262	17.7221	19.9993	19.9546	20.4154	20.2933	+	3.9415	22.5747	0	1.38171	3.33018	P10639	P10639	Thioredoxin	Txn
30.1397	30.3211	27.9579	28.0466	28.0912	28.3184	+	158.4	30.9547	0	2.29152	-2.0256	Q8CBB6;Q8CGP2;Q8CGP1;Q64475;P10853;Q6ZWY9;Q64525;Q64478;P10854;Q9D2U9;Q8CGP0;Q64524	Q8CBB6;Q8CGP2;Q8CGP1;Q64475;P10853;Q6ZWY9;Q64525;Q64478;P10854;Q9D2U9;Q8CGP0;Q64524	Histone H2B;Histone H2B type 1-P;Histone H2B type 1-K;Histone H2B type 1-B;Histone H2B type 1-F/J/L;Histone H2B type 1-C/E/G;Histone H2B type 2-B;Histone H2B type 1-H;Histone H2B type 1-M;Histone H2B type 3-A;Histone H2B type 3-B;Histone H2B type 2-E	Hist1h2br;Hist1h2bp;Hist1h2bk;Hist1h2bb;Hist1h2bf;Hist1h2bc;Hist2h2bb;Hist1h2bh;Hist1h2bm;Hist3h2ba;Hist3h2bb;Hist2h2be
23.4162	23.5207	26.4011	26.3046	26.2656	26.2887	+	78.274	28.2497	0	3.44036	2.80868	P10922	P10922	Histone H1.0;Histone H1.0, N-terminally processed	H1f0
17.9493	19.9656	16.0898	17.4932	16.9301	18.0941		16.185	19.9816	0	0.468229	-1.44539	P11031	P11031	Activated RNA polymerase II transcriptional coactivator p15	Sub1
19.9436	15.445	27.5904	27.6512	24.6437	24.4898	+	323.31	28.5601	0	1.03342	6.87243	P11087;CON__Q862S4	P11087	Collagen alpha-1(I) chain	Col1a1
23.6075	23.7721	21.9405	22.2999	21.7784	22.3658	+	93.33	24.0341	0	1.47162	-1.61776	P11440;D3Z2T9;Q80YP0;A0A0G2JDL3;E3W997;E9PVC7;A0A1L1SUS7;A0A1Y7VLM0;P49615;Q64261;Q99J95;Q3V3A1;Q04899;O35495;Q04735;Q8K0D0;Q14AX6;Q69ZA1	P11440;D3Z2T9	Cyclin-dependent kinase 1	Cdk1
26.441	26.3892	26.7002	26.6144	27.0873	27.0343	+	323.31	28.5081	0	2.48536	0.645735	P11499;E9Q3D6;E9PX27;E9Q0C3;D3Z1R1	P11499	Heat shock protein HSP 90-beta	Hsp90ab1
21.7051	21.5757	23.1206	23.3688	22.3895	22.4676	+	186.7	24.6499	0	2.04264	0.7881	P11983;F2Z483;A0A3B2WDE2	P11983	T-complex protein 1 subunit alpha	Tcp1
19.0126	17.6746	16.7897	16.8007	18.6229	18.0092		5.6379	18.6679	0	0.0116607	-0.0275841	P12382;A0A1W2P6Q4;Q8C605;Q9WUA3	P12382;A0A1W2P6Q4;Q8C605;Q9WUA3	ATP-dependent 6-phosphofructokinase, liver type;ATP-dependent 6-phosphofructokinase;ATP-dependent 6-phosphofructokinase, platelet type	Pfkl;Pfkp
21.838	21.628	25.7886	25.8035	25.8253	25.655	+	286.31	27.6545	0	2.94462	4.00715	P12970;V9GX35	P12970	60S ribosomal protein L7a	Rpl7a
18.6425	20.0656	17.9708	17.9285	17.6953	16.8708		5.7307	17.9342	0	0.892565	-2.07105	P13439	P13439	Uridine 5-monophosphate synthase;Orotate phosphoribosyltransferase;Orotidine 5-phosphate decarboxylase	Umps
23.3406	23.0626	19.6724	20.214	21.3189	20.3658	+	43.265	22.6724	0	1.38156	-2.35918	P13864;J3QNW0	P13864;J3QNW0	DNA (cytosine-5)-methyltransferase 1;DNA (cytosine-5)-methyltransferase	Dnmt1
23.2184	23.3279	22.1243	22.0506	21.9687	22.2214	+	2.1386	24.562	0	1.87345	-1.17808	P14069	P14069	Protein S100-A6	S100a6
17.9227	17.9872	23.673	23.6565	23.4635	23.6561	+	80.752	25.9153	0	3.48397	5.60484	P14115	P14115	60S ribosomal protein L27a	Rpl27a
21.6981	17.0523	23.6586	24.6588	23.6041	23.7699		28.189	26.3637	0	0.68879	4.31184	P14131	P14131	40S ribosomal protein S16	Rps16
20.1946	17.9004	25.1106	23.9353	24.6777	23.6764	+	36.406	26.3632	0	1.26204	5.12954	P14148;F6XI62	P14148;F6XI62	60S ribosomal protein L7	Rpl7
20.888	20.904	18.7937	15.1468	19.2137	19.1986	+	75.815	20.9964	0	4.37247	-1.68984	P14152;B1ATQ3	P14152	Malate dehydrogenase, cytoplasmic	Mdh1
24.0929	23.9505	26.5948	26.6019	26.4141	26.5709	+	276.48	28.473	0	2.73715	2.47083	P14206;A0A1L1SUK3;A0A1L1SRW0	P14206;A0A1L1SUK3	40S ribosomal protein SA	Rpsa
18.845	19.8577	22.8093	22.5639	22.2967	22.2007	+	26.129	24.1013	0	1.53075	2.89735	P14211	P14211	Calreticulin	Calr
17.6949	17.5307	17.7834	20.0326	18.0514	16.3538		5.2726	20.9004	0	0.16879	-0.410225	P14576;E9PXC0;A0A1W2P809;A0A1Y7VJJ0	P14576;E9PXC0	Signal recognition particle 54 kDa protein	Srp54;Srp54c
18.6381	18.4536	16.9363	19.5933	17.4867	17.0863	+	13.926	19.8672	0	1.53335	-1.25935	P14685	P14685	26S proteasome non-ATPase regulatory subunit 3	Psmd3
17.9264	16.6461	18.1375	16.8276	16.5887	17.2811		1.4173	17.9089	0.0030888	0.169493	-0.351409	P14719	P14719	Interleukin-1 receptor-like 1	Il1rl1
24.5433	24.2914	23.0266	23.0849	22.9971	23.1614	+	168.6	24.9833	0	1.90688	-1.33807	P14733	P14733	Lamin-B1	Lmnb1
18.7531	16.4264	21.6683	21.4117	21.3139	21.4456	+	132.02	23.5015	0	1.08126	3.78998	P14869;S4R1N1;D3YVM5	P14869;S4R1N1;D3YVM5	60S acidic ribosomal protein P0	Rplp0
24.2196	24.4264	23.6572	23.6565	23.6679	23.6657		28.392	26.0461	0	1.6211	-0.656235	Q5NC80;P15532	Q5NC80;P15532	Nucleoside diphosphate kinase;Nucleoside diphosphate kinase A	Nme1
26.0436	26.4996	29.0533	29.2252	29.2132	28.9734	+	38.634	31.0501	0	2.08468	2.82172	P15864	P15864	Histone H1.2	Hist1h1c
24.8294	25.0366	23.7826	23.8709	23.9235	24.0128	+	138.55	26.5464	0	1.87308	-0.964856	P16045;A0A2R8VHJ0	P16045	Galectin-1	Lgals1
16.8436	21.789	20.0544	20.9235	21.4143	20.9518		77.993	22.7409	0	0.275173	1.86673	Q8C253;P16110	Q8C253;P16110	Galectin;Galectin-3	Lgals3
21.9959	22.3442	22.3726	22.2585	21.9641	21.9611		20.825	23.9268	0	0.448838	-0.207438	P16460	P16460	Argininosuccinate synthase	Ass1
26.5178	26.732	27.0037	27.0412	26.8784	26.9969		323.31	28.7284	0	0.903051	0.312796	P17182;Q6PHC1;B0QZL1;B1ARR7;A0A0N4SUX5;P17183;B1ARR6;D3Z2S4;D3Z6E4;P21550;A0A0N4SUI6;D3YVD3;Q5SX59;A0A0N4SUW8;Q5SX61;Q5SX60;J3QPZ9	P17182;Q6PHC1	Alpha-enolase	Eno1
17.7878	17.013	17.8554	15.0401	14.8244	17.3974		1.2959	18.8101	0.0060196	0.358081	-1.28951	P17427;P17426	P17427;P17426	AP-2 complex subunit alpha-2;AP-2 complex subunit alpha-1	Ap2a2;Ap2a1
26.5712	26.6871	25.1426	25.4309	24.9976	25.3849	+	220.88	27.9204	0	1.71685	-1.43794	P17742;A0A1L1SST0;F8VPN3;A0A1L1SRX5;V9GXC1;V9GX31	P17742;A0A1L1SST0	Peptidyl-prolyl cis-trans isomerase A;Peptidyl-prolyl cis-trans isomerase A, N-terminally processed	Ppia
22.3194	22.2684	22.1019	21.6719	21.9263	21.9568		51.952	24.5326	0	2.15196	-0.352409	P17751;H7BXC3	P17751;H7BXC3	Triosephosphate isomerase	Tpi1
21.028	21.4704	19.9637	20.3311	20.0544	20.344		11.459	21.9879	0	1.2371	-1.05001	Q61696;P17879	Q61696;P17879	Heat shock 70 kDa protein 1A;Heat shock 70 kDa protein 1B	Hspa1a;Hspa1b
26.3504	25.9213	20.9249	21.2864	22.4535	22.4553	+	224.65	24.9681	0	2.47112	-3.68143	P17918;A0A140T8V5	P17918;A0A140T8V5	Proliferating cell nuclear antigen	Pcna
21.6138	20.045	19.1628	17.6776	19.2872	19.1631		12.086	21.3112	0	0.748805	-1.60425	P18608;A0A3B2W3M7	P18608;A0A3B2W3M7	Non-histone chromosomal protein HMG-14	Hmgn1
25.4501	25.2242	24.4481	24.4483	24.4584	24.7396		299.31	26.9702	0	1.26107	-0.738164	P18760;F8WGL3	P18760;F8WGL3	Cofilin-1	Cfl1
21.3669	19.592	23.3469	23.3236	23.2795	23.4682	+	169.55	25.0535	0	1.07904	2.89442	P19096;A0A0U1RNJ1	P19096;A0A0U1RNJ1	Fatty acid synthase;[Acyl-carrier-protein] S-acetyltransferase;[Acyl-carrier-protein] S-malonyltransferase;3-oxoacyl-[acyl-carrier-protein] synthase;3-oxoacyl-[acyl-carrier-protein] reductase;3-hydroxyacyl-[acyl-carrier-protein] dehydratase;Enoyl-[acyl-carrier-protein] reductase;Oleoyl-[acyl-carrier-protein] hydrolase	Fasn
17.8622	16.5428	18.5992	18.879	17.3088	16.7823		100.98	20.3301	0	0.0728119	-0.156923	P19157;P46425	P19157;P46425	Glutathione S-transferase P 1;Glutathione S-transferase P 2	Gstp1;Gstp2
22.55	22.6029	24.478	23.8209	23.7837	23.8578	+	21.289	26.4007	0	2.87379	1.24428	P19253;A0A1B0GSB2;A0A1B0GSQ6;A0A1B0GTA1;A0A1B0GS68;A0A1B0GQW6;A0A1B0GSL5;A0A1B0GSC2;A0A1B0GRH1;A0A1B0GSF0;A0A140T8K2;A0A1B0GT00	P19253;A0A1B0GSB2;A0A1B0GSQ6;A0A1B0GTA1;A0A1B0GS68	60S ribosomal protein L13a	Rpl13a
22.2311	22.0032	26.3741	26.5552	25.7266	25.7071	+	323.31	27.7496	0	2.99655	3.59968	P19324;A0A140LHR4;A0A140LHK0;A0A140LHD6	P19324	Serpin H1	Serpinh1
16.9864	17.7014	17.688	19.702	19.1517	19.7868	+	105.94	21.3169	0	1.32727	2.12532	P19783;M0QWX7	P19783;M0QWX7	Cytochrome c oxidase subunit 4 isoform 1, mitochondrial	Cox4i1
24.4739	24.5949	26.7486	26.7806	26.3487	26.4059	+	323.31	28.1952	0	2.88049	1.8429	P20029	P20029	78 kDa glucose-regulated protein	Hspa5
18.9808	17.9907	18.0378	16.1227	17.1622	17.8529		33.798	19.5465	0	0.608055	-0.9782	P20108	P20108	Thioredoxin-dependent peroxide reductase, mitochondrial	Prdx3
26.6057	26.6272	26.37	26.4276	26.2746	26.3472		323.31	28.1333	0	1.82311	-0.305504	P20152;A0A0A6YWC8;A2AKJ2;G5E846;A0A2R8W6R6;G3X981;P31001;P15331;CON__Q9DCV7;CON__Q3KNV1;CON__P08729;Q9DCV7;CON__Q9H552;CON__Q9NSB2;CON__Q6ISB0;D3YZ35;A0A0R4J036;P46660;P08551;P08553	P20152;A0A0A6YWC8	Vimentin	Vim
17.9442	15.7399	17.483	18.4762	18.596	18.3897		25.012	20.5569	0	0.561611	1.65079	P22935	P22935	Cellular retinoic acid-binding protein 2	Crabp2
18.2337	17.4636	22.599	22.5113	22.6012	22.5967	+	182.58	24.1761	0	2.1866	4.75028	P23116	P23116	Eukaryotic translation initiation factor 3 subunit A	Eif3a
26.641	26.7882	22.0499	22.2723	23.1758	23.5262	+	172.29	26.1741	0	2.49793	-3.36358	Q9DCC5;P23198;D3Z1A9;D3Z313	Q9DCC5;P23198	Chromobox protein homolog 3	Cbx3
17.578	20.4597	18.6847	17.0039	18.7693	18.9878		19.147	21.121	0	0.0308194	-0.140324	Q543K9;P23492;Q9D8C9	Q543K9;P23492	Purine nucleoside phosphorylase	Pnp
17.9384	18.5928	21.9582	21.8746	21.6763	21.6924	+	163.99	24.1771	0	2.04377	3.41877	P24369	P24369	Peptidyl-prolyl cis-trans isomerase B	Ppib
20.6248	20.9185	20.48	20.0246	20.4237	20.819		73.541	22.2463	0	0.219168	-0.150316	P24527	P24527	Leukotriene A-4 hydrolase	Lta4h
27.0025	26.8212	22.6226	22.5784	25.4481	25.4431	+	297.7	26.6292	0	2.41969	-1.46627	P25206	P25206	DNA replication licensing factor MCM3	Mcm3
18.6678	18.1998	25.476	25.4207	25.1508	25.2552	+	163.12	27.1714	0	2.90234	6.76924	P25444;D3YVC1;D3YWJ3;D3Z536	P25444;D3YVC1;D3YWJ3;D3Z536	40S ribosomal protein S2	Rps2;Gm8225
18.5985	17.4354	16.6009	17.9328	17.0812	15.7334		4.4604	19.6329	0	0.673083	-1.60966	Q6PI17;P25785	Q6PI17;P25785	Metalloproteinase inhibitor 2	Timp2
21.4411	21.5638	22.66	22.5016	22.7724	22.6763	+	323.31	24.3557	0	2.39337	1.22194	P26039;F6S1V7;F6SX70;A0A1L1SQP9;Q8CDM9;A0A1L1SRI1;E9PUM4;A0A1L1SQ51;Q71LX4	P26039	Talin-1	Tln1
18.7492	18.4148	14.8677	15.6981	17.081	20.8552		1.6246	20.2435	0.002437	0.0668313	0.386085	P26040;Q7TSG6	P26040;Q7TSG6	Ezrin	Ezr;Rdx
23.9868	23.8682	25.6656	25.7656	25.451	25.412	+	323.31	27.2539	0	2.765	1.50404	P26041	P26041	Moesin	Msn
18.3144	17.1934	17.3083	14.5663	17.9881	19.6518		2.9275	20.4257	0	0.398776	1.06603	P26231	P26231	Catenin alpha-1	Ctnna1
19.8213	19.8478	17.1642	15.6907	17.7579	16.8059	+	8.7814	19.8624	0	1.48049	-2.55263	P26350;A0A087WP98;A0A087WPN6;A0A087WQN2	P26350;A0A087WP98;A0A087WPN6;A0A087WQN2	Prothymosin alpha;Prothymosin alpha, N-terminally processed;Thymosin alpha	Ptma
21.5752	21.7533	21.4008	21.405	21.422	20.8682		6.4093	22.8571	0	0.665144	-0.519127	P26443;F7CFA5	P26443	Glutamate dehydrogenase 1, mitochondrial	Glud1
18.2659	18.195	22.0331	22.0342	21.849	21.6839	+	210.01	23.4392	0	3.19091	3.53599	Q8C483;P26638;A2AFS0;A2AFS1	Q8C483;P26638;A2AFS0	Serine--tRNA ligase, cytoplasmic	Sars
17.5735	17.4392	17.0847	16.2524	20.5141	16.0021		2.8085	22.8678	0	0.113089	0.751772	P26883	P26883	Peptidyl-prolyl cis-trans isomerase FKBP1A	Fkbp1a
17.7465	18.3172	22.3574	22.0515	21.087	16.3146		203.03	23.4349	0	0.0931862	0.66891	P27046;F6QMB7	P27046	Alpha-mannosidase 2	Man2a1
19.5738	20.7784	25.5394	25.5473	26.4478	25.4319	+	91.275	27.4542	0	1.74042	5.76376	P27659;A0A2R8VHN4;A0A087WNS0;A0A087WQK0;Q9CQ09;E9PWZ3	P27659	60S ribosomal protein L3	Rpl3
18.4425	16.2893	19.5071	16.7726	16.6919	15.5678		59.394	20.9969	0	0.38105	-1.23606	P27661;Q64522	P27661	Histone H2AX	H2afx
22.5628	22.4694	25.816	25.8668	25.3723	25.5308	+	216.29	27.2836	0	3.0083	2.93544	P27773;F6Q404	P27773	Protein disulfide-isomerase A3	Pdia3
21.7794	21.5939	17.0845	16.3669	16.4081	16.6039	+	7.9099	20.3701	0	3.1694	-5.18067	P27790	P27790	Major centromere autoantigen B	Cenpb
22.5918	22.3787	20.6891	21.1237	21.1502	21.5363	+	51.471	23.1081	0	1.4519	-1.14201	P28352;F6QA74;D3Z124;D3Z6R9	P28352;F6QA74;D3Z124;D3Z6R9	DNA-(apurinic or apyrimidinic site) lyase;DNA-(apurinic or apyrimidinic site) lyase, mitochondrial	Apex1
18.6468	17.2921	23.2484	23.3009	21.6847	21.9602	+	28.99	24.5407	0	1.51277	3.85304	P28653;P28654	P28653	Biglycan	Bgn
18.9629	17.371	19.6246	15.2765	16.4677	15.7663		16.924	20.9069	0	0.846111	-2.04993	Q3TF41;Q8BSH9;P28656	Q3TF41;Q8BSH9;P28656	Nucleosome assembly protein 1-like 1	Nap1l1
17.9734	16.441	17.9757	16.9434	18.7527	16.2008		1.6438	18.3803	0.002447	0.0589994	0.269547	P28658	P28658	Ataxin-10	Atxn10
21.7062	21.5295	25.7412	25.6408	25.4786	25.5573	+	323.31	27.1498	0	3.21143	3.90012	P29341;Q9D4E6;F6ZAX1;A0A2I3BR37;A2A5N3;Q8C7D3	P29341;Q9D4E6	Polyadenylate-binding protein 1;Polyadenylate-binding protein	Pabpc1;Pabpc6
18.0802	18.559	17.7494	16.3202	17.2159	17.433		9.384	19.8799	0	1.19904	-0.99515	P30412	P30412	Peptidyl-prolyl cis-trans isomerase C	Ppic
17.658	19.649	20.8911	20.55	21.0068	20.6302		8.9509	22.3968	0	0.779677	2.16501	P30416;F7CAT1;F6S2D5	P30416	Peptidyl-prolyl cis-trans isomerase FKBP4;Peptidyl-prolyl cis-trans isomerase FKBP4, N-terminally processed	Fkbp4
25.1777	25.1726	23.7732	23.6981	24.4551	24.2226	+	38.553	26.039	0	1.72619	-0.836334	P30681;A0A1B0GQX9	P30681;A0A1B0GQX9	High mobility group protein B2	Hmgb2
17.8456	17.4582	16.7023	16.6266	17.3322	15.7491		1.492	18.2261	0.0031323	0.514475	-1.11128	P32020	P32020	Non-specific lipid-transfer protein	Scp2
21.7917	22.2161	21.3909	21.3831	21.3294	21.5294		187.9	23.4158	0	0.872958	-0.574531	P32067;F6SXM5;A2AR07;D6RI87	P32067;F6SXM5	Lupus La protein homolog	Ssb
17.3577	17.7656	21.0169	21.2597	21.0902	21.0772	+	13.987	22.6799	0	2.47621	3.52203	P32233	P32233	Developmentally-regulated GTP-binding protein 1	Drg1
20.8605	20.4443	16.4234	16.7235	18.6034	15.2787		4.1254	19.5675	0	0.803798	-3.71131	P33174	P33174	Chromosome-associated kinesin KIF4	Kif4
18.7967	17.0692	16.4821	17.6955	17.2998	15.4822		3.8303	18.623	0	0.463709	-1.54199	P33434	P33434	72 kDa type IV collagenase;PEX	Mmp2
16.98	17.452	21.6781	21.788	21.7983	21.5029	+	6.809	23.6533	0	2.40693	4.4346	P34022;H7BX22	P34022;H7BX22	Ran-specific GTPase-activating protein	Ranbp1
18.9722	18.153	19.8421	19.8934	16.3936	16.3708	+	8.3298	22.112	0	1.47431	-2.18036	P34884	P34884	Macrophage migration inhibitory factor	Mif
18.4821	18.313	17.2171	16.0889	15.7708	16.9651	+	1.4529	18.7086	0.0031056	1.10738	-2.02961	P35235	P35235	Tyrosine-protein phosphatase non-receptor type 11	Ptpn11
19.3136	17.8513	19.891	19.9079	19.8966	20.4196		12.515	22.4436	0	0.745708	1.5756	Q8C266;P35278;A2A5F6;A2A5F5	Q8C266;P35278	Ras-related protein Rab-5C	Rab5c
16.8534	17.7998	20.5162	20.6092	20.0092	19.8863	+	21.628	22.7206	0	1.50061	2.62118	P35279;P61294;D3YV69;A0A1L1SRS6	P35279;P61294	Ras-related protein Rab-6A;Ras-related protein Rab-6B	Rab6a;Rab6b
18.4805	18.2503	19.0382	18.2679	18.3476	18.4618		51.996	21.2587	0	0.103211	0.0393333	P35282;A0A1W2P6Z4	P35282;A0A1W2P6Z4	Ras-related protein Rab-21	Rab21
17.9112	17.0645	19.1881	19.7623	19.3421	19.4098	+	8.2843	21.9452	0	1.32737	1.88809	P35293	P35293	Ras-related protein Rab-18	Rab18
21.0122	17.2482	24.3632	24.8222	24.3776	24.3912	+	83.595	26.4248	0	0.966867	5.25416	P35550;A0A140LIR6	P35550	rRNA 2-O-methyltransferase fibrillarin	Fbl
19.9135	20.569	22.0884	22.242	21.7867	22.2223	+	21.854	23.8964	0	1.33382	1.76328	P35564	P35564	Calnexin	Canx
23.6862	24.1486	22.5225	22.8793	22.6004	22.8227	+	11.202	25.4894	0	1.37261	-1.20587	P35700;B1AXW5;B1AXW6;B1AXW4	P35700;B1AXW5;B1AXW6;B1AXW4	Peroxiredoxin-1	Prdx1
20.6189	21.0603	21.2355	21.3434	20.9878	21.2899		177.65	23.9565	0	0.420836	0.299279	P35979	P35979	60S ribosomal protein L12	Rpl12
24.1954	22.9536	24.958	24.9883	25.1886	24.921		165.89	26.9834	0	0.838412	1.48036	P35980;A0A1B0GSS8;A0A1B0GQU8;A0A1B0GSA8;A0A1B0GSF7;A0A1B0GRZ3;A0A1B0GS28	P35980;A0A1B0GSS8;A0A1B0GQU8;A0A1B0GSA8;A0A1B0GSF7	60S ribosomal protein L18	Rpl18
17.9679	17.9873	20.7054	20.2545	20.2835	20.1398	+	9.3929	22.1451	0	2.97814	2.23405	Q05DV1;P37040;E9PVT9;E9Q997	Q05DV1;P37040;E9PVT9;E9Q997	NADPH--cytochrome P450 reductase	Por
23.3641	23.7031	22.6583	22.4415	22.5076	22.6971	+	100.47	25.175	0	1.38903	-0.931298	P37804;A0A1L1STN8	P37804;A0A1L1STN8	Transgelin	Tagln
17.4657	18.2042	20.2145	20.1268	17.1127	15.5563		14.436	21.1828	0	0.650442	-1.50048	P37889	P37889	Fibulin-2	Fbln2
21.5918	22.3193	18.7181	16.7263	20.4728	20.232	+	51.731	21.4256	0	1.27864	-1.60315	Q3U4X8;P37913;E9PV36;V9GWZ4;D3YUW4	Q3U4X8;P37913;E9PV36;V9GWZ4	DNA ligase;DNA ligase 1	Lig1
25.0479	25.3386	24.7377	24.8375	24.12	24.4603		323.31	26.4655	0	1.2498	-0.903069	P38647	P38647	Stress-70 protein, mitochondrial	Hspa9
17.668	19.2406	17.3313	17.281	17.6621	15.4813		5.5514	16.9253	0	0.528149	-1.88259	P39689	P39689	Cyclin-dependent kinase inhibitor 1	Cdkn1a
18.3081	18.54	21.3732	21.3329	21.4479	21.1176	+	179.87	22.8981	0	2.30575	2.85871	P40124;B1ARS0	P40124;B1ARS0	Adenylyl cyclase-associated protein 1;Adenylyl cyclase-associated protein	Cap1
26.0146	26.2159	24.4361	24.4216	24.9201	25.011	+	264.08	26.6494	0	2.04085	-1.14977	P40142;A0A286YE28;E0CY51	P40142;A0A286YE28	Transketolase	Tkt
19.4868	19.6195	22.349	22.3898	21.9734	22.131	+	90.156	24.5293	0	2.77068	2.49904	P41105;F6Z0X0	P41105	60S ribosomal protein L28	Rpl28
17.2741	17.4892	18.58	16.5116	17.6487	19.2215		4.4803	20.6393	0	0.500776	1.05349	P42125	P42125	Enoyl-CoA delta isomerase 1, mitochondrial	Eci1
17.337	19.6135	17.2995	16.6022	16.1496	16.1504		3.2149	19.856	0	0.750089	-2.32529	P42227	P42227	Signal transducer and activator of transcription 3	Stat3
17.9878	17.6026	16.4092	16.6573	16.6863	18.9601		4.1406	19.8544	0	0.00753317	0.0280466	P42669	P42669	Transcriptional activator protein Pur-alpha	Pura
22.6489	22.5855	23.1284	23.2713	23.0594	23.005		74.558	24.8478	0	2.00049	0.414953	P42932;H3BL49;H3BLL1;H3BKG2;H3BJB6;H3BKR8	P42932;H3BL49	T-complex protein 1 subunit theta	Cct8
18.6156	21.097	15.7974	15.2626	17.5964	16.5456		1.7162	19.1159	0.0008285	0.757816	-2.7853	P43136;F7DC78	P43136;F7DC78	Nuclear receptor subfamily 2 group F member 6	Nr2f6
21.8148	21.5226	17.1157	15.9828	16.3757	16.9692	+	18.067	20.3448	0	2.36106	-4.99619	P43247;G3UXD8;G3UWZ8	P43247	DNA mismatch repair protein Msh2	Msh2
29.084	29.1686	30.2923	30.1865	30.3177	30.3522	+	323.31	32.1765	0	2.84612	1.20861	P43274;I7HFT9;Q07133	P43274	Histone H1.4	Hist1h1e
25.701	26.1826	28.7466	28.7381	28.7305	28.88	+	308.52	30.7227	0	2.11545	2.86345	P43275	P43275	Histone H1.1	Hist1h1a
27.2112	27.2506	28.9896	28.984	29.1018	29.2091	+	227.03	30.9503	0	3.05488	1.92452	P43276	P43276	Histone H1.5	Hist1h1b
28.2208	28.4065	28.7953	28.7726	29.0827	29.107	+	63.581	30.9856	0	1.85151	0.781195	P43277	P43277	Histone H1.3	Hist1h1d
19.8742	20.1791	19.2107	19.4865	19.9157	19.6731		10.452	21.6064	0	0.44924	-0.232299	P45376;D3YVJ7	P45376	Aldose reductase	Akr1b1
19.0557	17.1542	20.2442	19.3438	20.1702	19.9915		64.287	21.4943	0	0.758412	1.97589	P46664	P46664	Adenylosuccinate synthetase isozyme 2	Adss
21.5925	21.4253	17.6554	16.3312	17.3411	16.1772	+	12.89	19.3484	0	1.82453	-4.74975	P46737;A3KGA8;E9Q0P6	P46737;A3KGA8	Lys-63-specific deubiquitinase BRCC36	Brcc3
16.9813	17.3535	20.8138	21.0507	21.0532	21.3742	+	38.294	22.6297	0	2.4356	4.04632	P46935;V9GWV8;Q3V335;A0A286YCM8;G3X9H8;E9PXB7;Q8CFI0;V9GXK3	P46935	E3 ubiquitin-protein ligase NEDD4	Nedd4
18.5353	16.8353	21.6421	21.8612	21.5448	21.5207	+	23.383	23.2694	0	1.3419	3.84742	P46978;D3YZN5	P46978	Dolichyl-diphosphooligosaccharide--protein glycosyltransferase subunit STT3A	Stt3a
17.2207	18.3635	17.6422	17.7666	17.5733	16.9939		2.0736	17.6856	0	0.291963	-0.508533	Q9DBX5;P47713	Q9DBX5;P47713	Cytosolic phospholipase A2;Phospholipase A2;Lysophospholipase	Pla2g4a
21.1806	20.6141	20.3114	20.3952	20.0113	19.9847		88.937	22.2384	0	1.06218	-0.89939	P47738;A0A0G2JEU1;A0A0G2JF60;A0A0G2JFQ0	P47738;A0A0G2JEU1;A0A0G2JF60;A0A0G2JFQ0	Aldehyde dehydrogenase, mitochondrial	Aldh2
21.0002	21.1857	20.0726	19.9784	20.5499	20.5541		132.16	22.8391	0	1.55017	-0.540977	P47753;Q5RKN9;A0A0G2JE27	P47753;Q5RKN9	F-actin-capping protein subunit alpha-1	Capza1
19.6843	16.4342	16.1695	14.6495	17.0767	16.6943		76.511	21.4988	0	0.261516	-1.17377	P47754;A0A0N4SVM0;D6RCW7	P47754;A0A0N4SVM0;D6RCW7	F-actin-capping protein subunit alpha-2	Capza2
18.9054	18.5498	16.6968	16.2891	18.9425	19.4545		6.4923	20.1267	0	0.568644	0.470827	P47791	P47791	Glutathione reductase, mitochondrial	Gsr
18.1815	18.0294	17.5908	17.556	17.0884	14.9998		11.255	18.4995	0	0.726216	-2.06134	P47856;Q9Z2Z9	P47856;Q9Z2Z9	Glutamine--fructose-6-phosphate aminotransferase [isomerizing] 1;Glutamine--fructose-6-phosphate aminotransferase [isomerizing] 2	Gfpt1;Gfpt2
20.5423	20.609	24.9958	24.9308	25.8484	24.7841	+	201.72	27.1108	0	1.90601	4.7406	P47911;A0A0J9YU32	P47911	60S ribosomal protein L6	Rpl6
22.6482	22.5844	23.8577	23.725	23.7882	23.7892	+	173.56	25.9188	0	3.13079	1.17245	P47962;D3YYV8	P47962;D3YYV8	60S ribosomal protein L5	Rpl5
19.6176	19.5798	24.6666	24.9632	24.2663	24.3301	+	106.77	26.6252	0	4.20606	4.69948	P47963	P47963	60S ribosomal protein L13	Rpl13
24.0602	23.8474	23.113	23.2019	23.1076	23.2398	+	253.74	25.3584	0	1.60499	-0.780099	P48036;A0A0G2JGQ0	P48036	Annexin A5	Anxa5
28.8578	28.8651	27.1066	27.1778	27.2894	27.237	+	323.31	29.1567	0	3.56267	-1.59823	P48678;D3YUF7	P48678	Prelamin-A/C;Lamin-A/C	Lmna
21.0186	22.8742	20.2388	19.6169	16.2763	18.8064	+	19.39	21.7545	0	0.971103	-4.40508	P48754;A0A087WPK5	P48754	Breast cancer type 1 susceptibility protein homolog	Brca1
17.4436	19.619	16.3917	16.4659	15.9243	16.7219		10.413	20.3072	0	0.705764	-2.20824	P48758;A0A338P684	P48758;A0A338P684	Carbonyl reductase [NADPH] 1	Cbr1
17.2261	18.9124	20.8665	20.5356	16.0609	14.8905		4.2821	21.9789	0	0.894974	-2.59355	P48962;Q3V132	P48962	ADP/ATP translocase 1	Slc25a4
23.9489	23.8891	21.9921	22.1421	22.0969	22.3701	+	288.26	24.3039	0	2.16672	-1.68546	Q5EBP8;P49312	Q5EBP8;P49312	Heterogeneous nuclear ribonucleoprotein A1;Heterogeneous nuclear ribonucleoprotein A1, N-terminally processed	Hnrnpa1
21.395	21.5825	17.3401	16.2249	16.8005	17.5926	+	55.613	20.2983	0	2.05189	-4.29221	P49452	P49452	Centromere protein C	Cenpc
25.8541	25.6144	20.3615	20.1546	25.0083	24.6959		323.31	25.6671	0	1.33372	-0.882122	P49717;A0A2R8VHP7	P49717	DNA replication licensing factor MCM4	Mcm4
18.6264	16.2997	17.5681	18.4724	18.8393	15.9996		1.5563	20.2	0.0031873	0.00734979	-0.0435681	P49722;Q8BKE0	P49722;Q8BKE0	Proteasome subunit alpha type-2	Psma2
24.1417	24.2722	23.0784	22.9373	23.4048	23.5104	+	133.03	25.0409	0	1.90979	-0.749351	P50247;A2ALT5	P50247	Adenosylhomocysteinase	Ahcy
18.8361	17.4231	18.057	17.3968	17.5646	16.9024		8.4331	19.1127	0	0.432292	-0.896113	P50396;B7FAU8;D6RI86	P50396	Rab GDP dissociation inhibitor alpha	Gdi1
20.8089	17.4833	20.9927	20.9086	14.8629	20.6819		43.459	22.8092	0	0.141705	-1.37372	P50516	P50516	V-type proton ATPase catalytic subunit A	Atp6v1a
18.2352	19.9613	17.0803	16.8959	17.0336	15.5647		2.1249	18.6339	0	0.878851	-2.79913	P50518;A0A0N4SW34;A0A0N4SWA3;A0A0N4SW07;Q9D593	P50518;A0A0N4SW34	V-type proton ATPase subunit E 1	Atp6v1e1
20.7611	16.95	19.342	19.5587	19.4438	19.3905		76.845	21.9574	0	0.099079	0.56157	P50543	P50543	Protein S100-A11	S100a11
19.4947	17.1648	17.0918	15.9475	17.2759	14.4051		1.807	18.6584	0.00083822	0.508016	-2.48925	P50544;B1AR28	P50544;B1AR28	Very long-chain specific acyl-CoA dehydrogenase, mitochondrial	Acadvl
21.4625	17.8446	23.1554	22.6332	22.538	22.354		185.94	24.3762	0	0.579908	2.79242	Q3TGU7;P50580	Q3TGU7;P50580	Proliferation-associated protein 2G4	Pa2g4
17.0711	16.7465	21.89	21.5703	21.3703	21.61	+	265.07	23.9671	0	2.71367	4.5813	P51150;A0A0N4SVG9;A0A0N4SVR6	P51150;A0A0N4SVG9	Ras-related protein Rab-7a	Rab7a
16.8797	16.8133	18.7894	18.2621	18.2983	15.5571		6.3012	20.3607	0	0.0185611	0.0811896	P51660	P51660	Peroxisomal multifunctional enzyme type 2;(3R)-hydroxyacyl-CoA dehydrogenase;Enoyl-CoA hydratase 2	Hsd17b4
23.4869	23.1571	20.9042	21.401	21.4992	21.6671	+	7.4336	23.6551	0	1.95321	-1.73881	P51859;E0CXA0;E0CYW7	P51859;E0CXA0	Hepatoma-derived growth factor	Hdgf
17.7724	17.5045	16.294	15.8328	14.936	17.4619		2.2021	18.3644	0	0.426426	-1.4395	P51863	P51863	V-type proton ATPase subunit d 1	Atp6v0d1
22.7895	18.1711	22.5664	22.6312	22.4431	22.5838		16.938	24.7005	0	0.326371	2.03312	P51881	P51881	ADP/ATP translocase 2;ADP/ATP translocase 2, N-terminally processed	Slc25a5
20.5845	18.6386	15.9482	15.421	17.2272	16.1325		47.998	21.0268	0	0.922468	-2.93165	P52293;A2A600;A2A601;A6PW68	P52293;A2A600;A2A601;A6PW68	Importin subunit alpha-1	Kpna2
18.053	16.4355	21.2816	21.6254	20.9799	20.8687	+	140.5	22.7757	0	1.34435	3.68002	P52432;D3Z7Q8;G3UXX5;D3Z3D6;G3UX92	P52432;D3Z7Q8;G3UXX5;D3Z3D6	DNA-directed RNA polymerases I and III subunit RPAC1	Polr1c
25.4699	25.5593	26.9144	26.9301	26.6186	26.8206	+	323.31	28.522	0	2.08143	1.205	P52480;A0A1L1SU37;A0A1L1SQV8;A0A1L1SUV0;A0A1L1SSN6;A0A1L1STV8;A0A1L1ST52;A0A1L1SVH2;E9Q509;G3X925;P53657	P52480	Pyruvate kinase PKM	Pkm
22.4144	22.6322	22.1895	21.381	21.9475	21.5872		128.08	24.2272	0	1.15762	-0.755901	Q6NSP9;P52927	Q6NSP9;P52927	High mobility group protein HMGI-C	Hmga2
23.852	23.5706	23.8682	23.7431	23.9786	23.3049		185.83	25.4993	0	0.0621968	-0.0695019	P53994;Q3TEG7;P59279;G3UXQ7;G3V022;A0A1D5RMH1;S4R232	P53994;Q3TEG7;P59279	Ras-related protein Rab-2A;Ras-related protein Rab-2B	Rab2a;Rab2b
17.5733	19.6714	19.7953	19.9795	19.6841	16.6655		55.119	21.0992	0	0.0807542	-0.447558	P54071;A0A0U1RP68;D6RIL6	P54071	Isocitrate dehydrogenase [NADP], mitochondrial	Idh2
21.5596	20.5955	16.0824	16.1621	19.6054	16.2498		6.3527	20.0938	0	0.671773	-3.14994	P54276	P54276	DNA mismatch repair protein Msh6	Msh6
18.2088	18.0859	21.4479	21.1116	21.0391	20.8303	+	69.498	22.6642	0	2.72484	2.78738	P54823	P54823	Probable ATP-dependent RNA helicase DDX6	Ddx6
19.151	16.6898	16.8089	16.575	17.5483	15.1327		64.249	18.4472	0	0.34078	-1.57983	P55258	P55258	Ras-related protein Rab-8A	Rab8a
17.4784	18.479	20.3243	20.6243	16.5876	16.8405		2.0172	22.5901	0	0.873325	-1.26464	P56135;F8WHP8	P56135;F8WHP8	ATP synthase subunit f, mitochondrial	Atp5j2
17.6488	20.4624	19.3898	19.719	17.4592	20.1464		35.771	21.3956	0	0.0416823	-0.252834	Q3U4W8;P56399;D3Z4K7;D3YYA5	Q3U4W8;P56399	Ubiquitin carboxyl-terminal hydrolase;Ubiquitin carboxyl-terminal hydrolase 5	Usp5
22.5483	23.2724	24.4375	24.1984	23.5931	23.7479		140.6	25.791	0	0.753321	0.760129	P56480	P56480	ATP synthase subunit beta, mitochondrial	Atp5b
18.1981	17.7102	17.5596	17.4128	17.0792	17.2744		1.9895	18.9206	0	1.00966	-0.777355	P56812	P56812	Programmed cell death protein 5	Pdcd5
25.229	25.1172	26.692	26.613	26.7206	26.8073	+	323.31	28.3629	0	2.70551	1.59089	P58252;G3UXK8	P58252	Elongation factor 2	Eef2
18.309	16.9266	14.9055	18.9396	18.0276	16.202		2.5725	20.0552	0	0.152814	-0.502944	Q8BVV6;P59325;A0A1Y7VKT5;A0A1Y7VLL6;A0A1Y7VLQ0;A0A1Y7VLK2;A0A1Y7VNP4;A0A1Y7VJG2	Q8BVV6;P59325;A0A1Y7VKT5	Eukaryotic translation initiation factor 5	Eif5
20.2891	16.6956	17.0379	17.2144	16.1703	16.6152		1.6427	18.2076	0.002443	0.436629	-2.09958	P59529	P59529	Taste receptor type 2 member 16	Tas2r16
18.713	18.1826	21.4852	21.5748	21.1728	21.5095	+	206.92	23.8536	0	1.93619	2.89334	P59999;Q3TX55;E9PWA7	P59999	Actin-related protein 2/3 complex subunit 4	Arpc4
16.8119	18.4053	20.92	20.5762	20.5193	20.615	+	4.3811	22.2252	0	1.18248	2.95857	P60229	P60229	Eukaryotic translation initiation factor 3 subunit E	Eif3e
23.8351	23.839	23.9999	24.1035	23.981	24.0757		323.31	25.838	0	1.25016	0.191298	P60335	P60335	Poly(rC)-binding protein 1	Pcbp1
18.165	17.7672	17.276	16.3173	15.9445	21.8679		101.36	23.406	0	0.107084	0.940063	P60710;E9Q1F2;E9Q5F4;G3UZ07;F8WGM8;E9Q2D1;F6WX90;V9GXQ2	P60710;E9Q1F2;E9Q5F4;G3UZ07	Actin, cytoplasmic 1;Actin, cytoplasmic 1, N-terminally processed	Actb;Actg1
19.9993	20.1867	20.321	20.4027	20.2506	20.4093		10.348	23.0108	0	0.713759	0.236983	P60766	P60766	Cell division control protein 42 homolog	Cdc42
22.8978	23.2839	25.4935	25.4676	24.993	25.3989	+	312.88	26.9849	0	1.76326	2.1051	P60843	P60843	Eukaryotic initiation factor 4A-I	Eif4a1
20.36	18.5807	23.3559	23.2727	23.6082	23.1152	+	24.314	25.6356	0	1.28453	3.89129	P60867	P60867	40S ribosomal protein S20	Rps20
18.1494	16.531	19.552	19.8674	19.3825	19.416		17.526	21.8856	0	0.899727	2.05903	P61027;Q3TYH2;Q9DD03;Q8K386	P61027	Ras-related protein Rab-10	Rab10
18.6237	16.3276	14.9774	18.0782	16.5473	15.3873		3.1402	17.3249	0	0.441682	-1.50834	P61028	P61028	Ras-related protein Rab-8B	Rab8b
17.7492	20.3236	17.2281	17.1133	16.0641	15.965		69.165	19.7631	0	0.842899	-3.02184	P61082;F7CDT0;F6WMC0;G5E919	P61082;F7CDT0;F6WMC0	NEDD8-conjugating enzyme Ubc12	Ube2m
17.8827	17.2757	19.2836	17.4837	17.2546	16.618		2.1829	19.7978	0	0.550823	-0.6429	P61161	P61161	Actin-related protein 2	Actr2
17.6999	17.5737	19.6417	16.8963	17.5519	18.7301		2.7532	18.5755	0	0.314834	0.504256	Q8R5C5;P61164	Q8R5C5;P61164	Beta-centractin;Alpha-centractin	Actr1b;Actr1a
20.0564	19.9382	21.0752	21.1147	21.4592	21.8662	+	113.96	23.2544	0	1.8011	1.66539	P61222	P61222	ATP-binding cassette sub-family E member 1	Abce1
19.0782	19.018	22.5612	22.5962	22.5176	22.663	+	124.65	24.9045	0	3.30726	3.54222	P61255;B1ARA3;B1ARA5	P61255;B1ARA3;B1ARA5	60S ribosomal protein L26	Rpl26
22.489	22.2564	23.6528	23.9212	24.0747	24.1789	+	15.224	26.3067	0	2.28067	1.7541	P61358;A2A4Q0	P61358;A2A4Q0	60S ribosomal protein L27	Rpl27
20.1042	20.2246	22.127	22.1949	22.2303	21.7327	+	121.72	24.5142	0	1.71508	1.81714	P61514;A0A1D5RL86	P61514	60S ribosomal protein L37a	Rpl37a
19.1399	18.8045	23.3617	23.5285	22.8396	22.8478	+	18.907	24.8669	0	2.7278	3.87152	P61620;Q9CYJ6;Q9JLR1;A2ATT9;A0A0A6YVQ7	P61620	Protein transport protein Sec61 subunit alpha isoform 1	Sec61a1
21.932	21.772	21.3521	21.2581	21.1334	21.4955		6.7959	23.8655	0	0.94677	-0.537507	P61750;Q8BSL7;P84078;P61205;D3YV25;F6UFB9;E9Q2C2;E9Q798	P61750;Q8BSL7;P84078;P61205	ADP-ribosylation factor 4;ADP-ribosylation factor 2;ADP-ribosylation factor 1;ADP-ribosylation factor 3	Arf4;Arf2;Arf1;Arf3
16.908	17.0643	21.2377	21.5418	20.9034	20.9402	+	11.452	23.405	0	3.38111	3.93565	P61804	P61804	Dolichyl-diphosphooligosaccharide--protein glycosyltransferase subunit DAD1	Dad1
18.2716	17.7391	17.5436	16.9666	15.2391	17.1864		18.415	17.5366	0	0.662099	-1.79265	P61967	P61967	AP-1 complex subunit sigma-1A	Ap1s1
21.2005	21.2717	21.395	21.6957	21.4205	21.5532		105.05	23.4491	0	1.0997	0.250788	P61982	P61982	14-3-3 protein gamma;14-3-3 protein gamma, N-terminally processed	Ywhag
22.3028	22.2605	20.1362	20.3014	20.6229	20.7407	+	86.727	22.5541	0	2.81636	-1.59983	P62137	P62137	Serine/threonine-protein phosphatase PP1-alpha catalytic subunit	Ppp1ca
18.0044	18.7397	16.5998	15.9621	17.0103	16.9509	+	4.0237	18.0406	0	1.1963	-1.39142	P62141;A0A0G2JFF1;A0A0J9YUG2;A0A0J9YUU8	P62141;A0A0G2JFF1	Serine/threonine-protein phosphatase PP1-beta catalytic subunit	Ppp1cb
18.012	16.9635	17.456	14.1269	19.2253	16.3981		3.5764	20.5214	0	0.0706958	0.323988	P62192	P62192	26S protease regulatory subunit 4	Psmc1
18.2038	17.1445	17.0828	16.7113	18.1706	16.4533		3.0132	17.0735	0	0.12266	-0.362206	Q8K1K2;P62196	Q8K1K2;P62196	26S protease regulatory subunit 8	Psmc5
22.9481	23.6321	25.7266	25.8523	25.6474	26.0162	+	323.31	28.0685	0	1.64626	2.54168	P62242	P62242	40S ribosomal protein S8	Rps8
21.6601	22.222	23.5443	23.4477	23.4117	23.6306	+	23.128	25.8871	0	1.46178	1.58007	P62245;F8WJ41;D3YVB4;D3Z712	P62245;F8WJ41;D3YVB4;D3Z712	40S ribosomal protein S15a	Rps15a
23.8779	23.9538	22.7999	23.0551	23.161	22.9448	+	52.046	25.0966	0	1.76485	-0.862981	P62259;F6WA09;D6REF3	P62259;F6WA09;D6REF3	14-3-3 protein epsilon	Ywhae
21.4464	21.5059	23.4444	23.7763	23.8347	23.9895	+	42.587	26.1235	0	2.93662	2.43595	P62264;D3YVF4;D3Z7I1	P62264;D3YVF4;D3Z7I1	40S ribosomal protein S14	Rps14
20.6801	21.0733	23.3803	23.2919	23.1498	23.2284	+	22.351	25.5422	0	2.12873	2.31236	P62267	P62267	40S ribosomal protein S23	Rps23
21.7636	22.1059	24.3498	24.2381	24.3012	24.2273	+	147	26.6223	0	2.25164	2.32947	P62281;A0A1B0GRR3;A0A1B0GSE8	P62281;A0A1B0GRR3;A0A1B0GSE8	40S ribosomal protein S11	Rps11
20.4696	21.9718	24.3685	24.3725	24.1575	23.8277	+	79.998	26.5858	0	1.16067	2.77196	Q921R2;P62301;A0A0U1RQ71	Q921R2;P62301	40S ribosomal protein S13	Rps13
17.5496	17.7278	18.0145	19.6458	17.7668	16.4908		4.4522	22.0691	0	0.291104	-0.509921	P62305;E9Q4F4;E9Q0W8	P62305;E9Q4F4	Small nuclear ribonucleoprotein E	Snrpe
18.5167	17.8455	16.1899	16.1468	16.9813	16.3771		34.352	17.7689	0	1.09842	-1.50192	P62307	P62307	Small nuclear ribonucleoprotein F	Snrpf
18.4629	18.2746	16.6334	15.9449	16.5985	16.276	+	2.5351	19.0198	0	2.03539	-1.93155	P62313	P62313	U6 snRNA-associated Sm-like protein LSm6	Lsm6
18.4697	19.9051	20.0081	20.1677	20.1186	20.0435		23.166	22.5667	0	0.468906	0.893661	P62315	P62315	Small nuclear ribonucleoprotein Sm D1	Snrpd1
17.6996	16.2556	15.968	16.5587	17.9878	15.4591		1.7834	17.8608	0.00083333	0.0567592	-0.254172	P62317	P62317	Small nuclear ribonucleoprotein Sm D2	Snrpd2
17.1417	17.6927	16.5602	16.4745	19.1433	16.5474		4.3968	21.2579	0	0.109273	0.428162	P62320;A0A1W2P7K5	P62320	Small nuclear ribonucleoprotein Sm D3	Snrpd3
18.0363	17.6761	16.0856	17.5606	16.7327	15.1185		18.569	18.0296	0	0.839559	-1.9306	P62334	P62334	26S protease regulatory subunit 10B	Psmc6
17.8224	18.1797	17.2551	16.4743	17.7619	16.4245		2.6113	18.8862	0	0.494849	-0.907835	P62627	P62627	Dynein light chain roadblock-type 1	Dynlrb1
22.0626	21.33	25.8746	26.0279	25.4688	25.676	+	323.31	27.7257	0	2.02199	3.87612	P62702;V9GWY0	P62702;V9GWY0	40S ribosomal protein S4, X isoform;40S ribosomal protein S4	Rps4x;Gm15013
19.6736	22.3819	23.1134	22.8045	22.524	23.0189		74.797	24.5329	0	0.477786	1.74366	P63268;P68033;P62737;P68134;D3YZY0;D3Z2K3;A0A1D5RM20;A0A0U1RQ96	P63268;P68033;P62737;P68134;D3YZY0;D3Z2K3;A0A1D5RM20	Actin, gamma-enteric smooth muscle;Actin, alpha cardiac muscle 1;Actin, aortic smooth muscle;Actin, alpha skeletal muscle	Actg2;Actc1;Acta2;Acta1
18.7918	17.2511	17.5471	17.4179	22.6038	15.8563		2.6153	23.7056	0	0.119047	1.20862	P62748	P62748	Hippocalcin-like protein 1	Hpcal1
21.3803	20.9733	24.075	24.2661	23.88	23.9214	+	172.78	26.4249	0	2.25253	2.72393	P62751;D3YTY6	P62751	60S ribosomal protein L23a	Rpl23a
20.0628	20.5501	25.1171	24.9813	24.6062	24.7383	+	275.61	26.8247	0	2.47796	4.36585	P62754	P62754	40S ribosomal protein S6	Rps6
16.0021	17.3929	15.275	17.1784	16.9853	18.6345		135.46	21.0798	0	0.386357	1.11235	P62774	P62774	Myotrophin	Mtpn
30.5374	30.8245	28.8018	28.9456	29.3213	29.3678	+	201.64	31.4899	0	1.93437	-1.33642	P62806	P62806	Histone H4	Hist1h4a
18.8048	17.1987	19.1833	16.0695	17.8875	16.2132		5.0984	19.9413	0	0.302486	-0.951408	P62814;Q91YH6	P62814;Q91YH6	V-type proton ATPase subunit B, brain isoform	Atp6v1b2;Atp6v1b1
17.8736	16.3577	20.9019	20.8943	19.5845	20.409	+	99.815	22.9531	0	1.10137	2.88106	Q5SW88;P62821;Q5SW87;Q5SW86	Q5SW88;P62821;Q5SW87	Ras-related protein Rab-1A	Rab1;Rab1A
25.5834	25.5493	24.0748	24.1472	23.5446	23.6935	+	94.307	26.2147	0	2.814	-1.94729	P62827;Q14AA6;Q61820	P62827;Q14AA6	GTP-binding nuclear protein Ran	Ran;1700009N14Rik
21.7977	21.7729	23.2204	23.245	23.1238	23.2873	+	47.214	25.7139	0	2.472	1.42026	P62830;A2A6F8	P62830	60S ribosomal protein L23	Rpl23
17.3463	17.8058	17.0151	15.7743	18.4682	14.4903		4.3792	19.7834	0	0.194636	-1.09678	P62843;D3YTQ9	P62843;D3YTQ9	40S ribosomal protein S15	Rps15
17.134	17.5221	22.8682	23.0332	22.7596	23.0699	+	23.768	25.2699	0	2.70521	5.58671	P62849;A0A286YEB7	P62849;A0A286YEB7	40S ribosomal protein S24	Rps24
20.8829	20.4655	23.2623	23.159	22.4592	22.13	+	26.044	25.1733	0	1.58724	1.6204	P62855	P62855	40S ribosomal protein S26	Rps26
24.6627	24.2909	27.5951	27.5203	27.7923	28.1029	+	5.1242	30.1253	0	2.31554	3.47086	P62862;Q642K5	P62862;Q642K5	40S ribosomal protein S30	Fau
18.025	17.5301	18.1549	15.8363	15.8037	16.975		1.2717	18.7689	0.0059791	0.794054	-1.38823	P62869	P62869	Transcription elongation factor B polypeptide 2	Tceb2
18.8228	17.7339	19.3197	19.4112	19.0398	18.6624		7.4257	21.0974	0	0.371656	0.572797	P62874;H3BKR2;H3BLF7;Q61011	P62874;H3BKR2;H3BLF7	Guanine nucleotide-binding protein G(I)/G(S)/G(T) subunit beta-1	Gnb1
17.6802	17.0391	17.7582	16.6146	16.8341	19.7565		2.5279	21.334	0	0.225091	0.935621	P62880;D3Z1T4;D3Z1M1;E9QKR0;D3YZX3;P29387;A0A0A6YVN9;V9GWY1;E9PWM7	P62880;D3Z1T4;D3Z1M1;E9QKR0;D3YZX3;P29387	Guanine nucleotide-binding protein G(I)/G(S)/G(T) subunit beta-2;Guanine nucleotide-binding protein subunit beta-4	Gnb2;Gnb4
22.4123	22.7078	23.662	23.8562	23.8039	23.7633	+	59.108	26.1347	0	1.83766	1.22362	P62889;A0A2I3BQF4	P62889;A0A2I3BQF4	60S ribosomal protein L30	Rpl30
23.7603	23.6005	26.3644	26.3519	26.1739	26.2379	+	277.4	28.276	0	2.93571	2.52548	P62908;D3YV43;A0A140LI77	P62908;D3YV43;A0A140LI77	40S ribosomal protein S3	Rps3
18.7447	18.0662	21.5396	21.3965	21.3685	21.3659	+	54.126	23.6739	0	1.89041	2.96174	P62911;P17932	P62911	60S ribosomal protein L32	Rpl32
21.2896	21.0627	25.1714	25.2302	25.1018	25.2258	+	74.474	27.1524	0	2.97921	3.98769	P62918	P62918	60S ribosomal protein L8	Rpl8
17.3197	21.703	24.3165	25.2825	24.0883	24.0057		309.07	26.1567	0	0.75844	4.53569	P62960;A2BGG7;A0A0A0MQD2;B2RUF0;Q9Z2C8	P62960;A2BGG7	Nuclease-sensitive element-binding protein 1	Ybx1
22.3557	22.5058	21.8282	22.1787	22.2337	22.0958		257.38	24.5584	0	0.918015	-0.266006	P62962;Q5SX49;CON__P02584;J3QMC2	P62962;Q5SX49	Profilin-1;Profilin	Pfn1
29.2914	29.4515	26.2393	26.3599	26.7199	26.8029	+	132.75	29.2812	0	2.9237	-2.61006	P62983	P62983	Ubiquitin-40S ribosomal protein S27a;Ubiquitin;40S ribosomal protein S27a	Rps27a
17.3993	18.009	20.0994	20.3656	19.9538	20.2542	+	6.5928	22.5546	0	1.71056	2.39979	Q3TLP8;P63001;Q05144;P60764;A0A2R8VH29;A0A2R8VHH0;A0A1B0GSL4;G3UZM2;D3Z3L1;F2Z463;D3YX61;A2AC13;P84096;Q8R527;Q9ER71	Q3TLP8;P63001	Ras-related C3 botulinum toxin substrate 1	Rac1
18.1017	19.3814	20.2413	16.7356	19.665	20.1747		2.7712	21.4709	0	0.639672	1.17831	P63005;Q5SW16	P63005;Q5SW16	Platelet-activating factor acetylhydrolase IB subunit alpha	Pafah1b1
27.2521	27.5313	26.9806	26.9665	26.9733	27.0944		323.31	28.772	0	0.844853	-0.357851	P63017;Q504P4;P17156;D3Z5E2	P63017;Q504P4	Heat shock cognate 71 kDa protein	Hspa8
21.7867	21.9586	20.668	20.6705	20.6195	21.0066	+	39.658	23.3986	0	1.4238	-1.05963	P63028;D3YU75	P63028;D3YU75	Translationally-controlled tumor protein	Tpt1
25.3134	25.2812	24.7994	24.7258	24.3047	24.3472	+	304.4	26.4717	0	3.12305	-0.971333	P63038;D3Z7J9;D3Z2F2	P63038	60 kDa heat shock protein, mitochondrial	Hspd1
17.3811	18.0162	16.9866	19.3834	16.9152	16.1701		2.0411	21.0811	0	0.847464	-1.15596	P63085	P63085	Mitogen-activated protein kinase 1	Mapk1
18.404	17.1984	17.9753	18.0579	15.9595	18.5823		7.9116	20.6652	0	0.125776	-0.530277	P63087;A0A0G2JGC1	P63087;A0A0G2JGC1	Serine/threonine-protein phosphatase PP1-gamma catalytic subunit	Ppp1cc
24.0003	24.027	23.3565	23.2758	23.0934	23.2935	+	323.31	25.4748	0	1.82975	-0.820197	P63101;A0A2I3BQ03;D3YXN6;D3YXF4;D3YW45	P63101;A0A2I3BQ03;D3YXN6	14-3-3 protein zeta/delta	Ywhaz
21.3094	21.6709	16.7423	16.7019	18.136	16.3513	+	1.6436	20.1674	0.002445	1.36629	-4.24655	P63166;A0A087WRQ4	P63166;A0A087WRQ4	Small ubiquitin-related modifier 1	Sumo1
21.5534	22.2938	17.7534	18.2112	17.0048	18.7663	+	33.711	21.4427	0	1.2867	-4.03806	P63168;Q80ZS7	P63168;Q80ZS7	Dynein light chain 1, cytoplasmic	Dynll1;BC048507
27.0333	27.1055	28.5536	28.6486	28.1935	28.2482	+	323.31	30.0762	0	2.81145	1.15148	P63260;B1ATY1;G3UYG0;E9Q606	P63260	Actin, cytoplasmic 2;Actin, cytoplasmic 2, N-terminally processed	Actg1
21.2889	21.6058	24.6264	24.6056	24.2284	24.391	+	138.01	26.8137	0	2.41487	2.86234	P63276	P63276	40S ribosomal protein S17	Rps17
21.2343	21.7857	24.4221	24.5534	24.3329	24.6626	+	165.59	26.8159	0	1.94448	2.98775	P63325;A0A338P731;Q3UW83;A0A338P7K4;A0A3B2W864	P63325;A0A338P731;Q3UW83;A0A338P7K4;A0A3B2W864	40S ribosomal protein S10	Rps10
20.4894	16.6059	21.2609	21.4537	20.9869	21.29		223.46	23.4056	0	0.501875	2.59075	P67778;Q5SQG5	P67778;Q5SQG5	Prohibitin	Phb
22.5352	22.7024	23.5971	23.7429	23.848	24.0948	+	57.146	26.1743	0	1.92346	1.35258	P67984	P67984	60S ribosomal protein L22	Rpl22
24.152	23.5229	26.3739	26.2693	26.095	26.2426	+	323.31	28.1399	0	1.72876	2.33129	P68040	P68040	Guanine nucleotide-binding protein subunit beta-2-like 1;Guanine nucleotide-binding protein subunit beta-2-like 1, N-terminally processed	Gnb2l1
18.4844	17.556	22.5842	22.7071	21.7441	21.7805	+	73.713	23.8477	0	1.82201	3.7421	P68369;P05214	P68369;P05214	Tubulin alpha-1A chain;Tubulin alpha-3 chain	Tuba1a;Tuba3a
21.8424	22.1049	23.322	23.5183	22.6971	23.1709		19.097	24.9061	0	1.14771	0.960319	P68372;Q9D6F9;CON__ENSEMBL:ENSBTAP00000025008;A2AQ07;G3UZR1	P68372;Q9D6F9	Tubulin beta-4B chain;Tubulin beta-4A chain	Tubb4b;Tubb4a
20.963	21.3404	21.79	21.5444	21.0521	21.2406		46.595	23.5526	0	0.00783042	-0.00533104	P68510	P68510	14-3-3 protein eta	Ywhah
16.7884	17.3288	18.3988	19.1551	17.3207	18.5046		2.9407	20.4386	0	0.495208	0.854092	P70122;D6REV5;F6TN03	P70122	Ribosome maturation protein SBDS	Sbds
20.8807	20.8976	21.757	21.6084	21.3836	21.498		275.5	23.4443	0	1.96634	0.551715	P70168	P70168	Importin subunit beta-1	Kpnb1
18.2547	19.2948	16.9905	17.4958	16.6051	16.1044	+	2.1982	18.7187	0	1.2803	-2.41999	P70202	P70202	Latexin	Lxn
22.3915	22.5885	21.2372	21.1629	21.3542	21.1664	+	37.429	24.0182	0	1.91976	-1.22972	P70296;D3Z1V4;D6RHS6	P70296;D3Z1V4;D6RHS6	Phosphatidylethanolamine-binding protein 1;Hippocampal cholinergic neurostimulating peptide	Pebp1
18.3644	18.3582	17.8768	15.7592	21.2927	17.305		5.6351	23.6195	0	0.164629	0.93754	P70349;B0R1E3	P70349;B0R1E3	Histidine triad nucleotide-binding protein 1	Hint1
22.5387	21.7051	19.874	15.1114	26.8971	26.8846	+	246.22	27.1232	0	2.12181	4.76895	P70371;Q3V252	P70371;Q3V252	Telomeric repeat-binding factor 1	Terf1
18.4638	21.0428	20.6921	20.8327	20.3736	20.2227		11.113	22.5001	0	0.146191	0.544847	P70372	P70372	ELAV-like protein 1	Elavl1
24.6192	24.4054	15.8297	16.5073	15.8361	18.1387	+	73.545	23.0747	0	1.64193	-7.52489	Q5SV02;P70388;E9PUJ2;A8Y5I3	Q5SV02;P70388;E9PUJ2;A8Y5I3	DNA repair protein RAD50	Rad50
25.1771	25.1028	16.8419	17.0788	16.9983	16.7919	+	260.73	23.6852	0	3.75183	-8.24484	P70399;F6ZRL3;A2AU90;F6QNC8;F7CE65	P70399	Tumor suppressor p53-binding protein 1	Tp53bp1
17.6422	15.3957	22.0371	21.961	21.8032	22.197	+	144.44	23.9671	0	1.39079	5.48112	Q60817;P70670	Q60817;P70670	Nascent polypeptide-associated complex subunit alpha;Nascent polypeptide-associated complex subunit alpha, muscle-specific form	Naca
18.5493	18.3721	16.9216	17.0649	17.7187	19.5392		4.6859	19.9976	0	0.0599723	0.168225	P70698	P70698	CTP synthase 1	Ctps1
17.8667	17.3832	19.656	20.0441	19.8682	19.7191	+	32.159	21.4261	0	1.87498	2.16872	P70700;A2AP84	P70700;A2AP84	DNA-directed RNA polymerase I subunit RPA2	Polr1b
20.7136	21.369	22.1666	22.2467	21.8358	21.966		111.5	23.8317	0	0.907781	0.859573	P80313;A0A0N4SV00;A0A0N4SV22	P80313;A0A0N4SV00	T-complex protein 1 subunit eta	Cct7
22.1029	22.1878	23.3935	23.2555	22.7393	23.0761		323.31	24.8984	0	1.31729	0.762357	P80314;A0A1W2P7B7;A0A1W2P6Q3;A0A1W2P871;A0A1W2P828;A0A1W2P8B6	P80314	T-complex protein 1 subunit beta	Cct2
19.5625	21.4337	23.458	23.3603	22.2608	22.4282		213.72	24.5961	0	0.72526	1.84639	P80315;G5E839;G3UYW5;G3UXF3;G3UXG2	P80315;G5E839	T-complex protein 1 subunit delta	Cct4
21.1346	20.8441	21.5155	21.6824	21.5758	21.3779		155.45	23.4041	0	0.962181	0.487474	P80316;E0CZA1	P80316	T-complex protein 1 subunit epsilon	Cct5
21.7729	21.7384	22.736	22.84	22.49	22.4679	+	80.006	24.4136	0	3.09615	0.723231	P80317;Q61390;B1AT05	P80317	T-complex protein 1 subunit zeta	Cct6a
21.1104	21.8708	22.5303	22.5669	22.2415	22.1432		17.895	24.1608	0	0.680559	0.701766	P80318;E9Q133;Q3U0I3;F6Q609	P80318;E9Q133;Q3U0I3	T-complex protein 1 subunit gamma	Cct3
18.049	16.8231	22.121	22.2113	19.8214	19.5275	+	22.743	23.1145	0	1.14904	2.2384	P81117;Q3UKN6	P81117;Q3UKN6	Nucleobindin-2;Nesfatin-1	Nucb2
17.7264	16.5978	15.9828	15.5054	17.8832	16.1524		1.1434	17.0151	0.0094477	0.04492	-0.144265	P83870	P83870	PHD finger-like domain-containing protein 5A	Phf5a
19.8473	20.0676	21.3273	20.9996	21.8762	21.5426	+	74.853	23.7534	0	1.89383	1.75194	P83882;A0A2I3BPG9;A0A0A6YW33	P83882;A0A2I3BPG9;A0A0A6YW33	60S ribosomal protein L36a	Rpl36a;Gm6525
23.1056	23.5312	18.1209	16.0637	19.6664	19.6741	+	139.14	22.5302	0	2.47011	-3.64818	P83917;Q7TPM0;Q9CYJ8	P83917;Q7TPM0;Q9CYJ8	Chromobox protein homolog 1	Cbx1
17.8803	17.544	17.0096	17.0104	17.4087	18.1114		1.4954	20.0509	0.0031348	0.0393965	0.0479507	P84084	P84084	ADP-ribosylation factor 5	Arf5
17.9185	18.3912	18.9764	15.7406	18.5224	15.8201		1.6539	21.3046	0.002453	0.261413	-0.983593	P84104	P84104	Serine/arginine-rich splicing factor 3	Srsf3
17.4303	17.1777	19.9923	19.6333	17.3558	15.7026		25.665	20.6468	0	0.344936	-0.774841	P97298;Q5ND37;B7ZC25;CON__Q95121;F6S1M4;E9PWS2	P97298	Pigment epithelium-derived factor	Serpinf1
26.3374	26.3356	21.896	20.5661	24.8278	24.8654	+	323.31	25.9898	0	3.79739	-1.48986	P97310;A0A0N4SVY2	P97310	DNA replication licensing factor MCM2	Mcm2
27.2759	26.9977	20.8807	20.7562	25.1728	25.3264	+	323.31	26.6157	0	2.15405	-1.88718	P97311;Q3ULG5	P97311;Q3ULG5	DNA replication licensing factor MCM6;DNA helicase	Mcm6
17.6556	18.3083	16.4713	16.1154	16.0081	16.1038	+	2.0431	18.6684	0	1.55135	-1.92602	P97314;A0A1W2P780;A0A1W2P7N8;A0A1W2P6I3;A0A1W2P758;A0A1W2P845	P97314;A0A1W2P780;A0A1W2P7N8;A0A1W2P6I3;A0A1W2P758;A0A1W2P845	Cysteine and glycine-rich protein 2	Csrp2
21.4134	21.7058	21.1318	21.2466	21.2358	21.1473		42.541	23.8566	0	0.86147	-0.36805	P97315	P97315	Cysteine and glycine-rich protein 1	Csrp1
24.5667	21.2501	17.32	17.8558	16.6002	18.0661	+	54.165	22.3342	0	1.03871	-5.57526	P97329	P97329	Kinesin-like protein KIF20A	Kif20a
22.9721	23.059	25.6459	25.5767	25.462	25.5549	+	323.31	27.4981	0	3.18631	2.49289	P97351	P97351	40S ribosomal protein S3a	Rps3a
17.454	16.7949	20.7376	20.5086	20.1415	20.4384	+	11.421	22.0524	0	1.89325	3.16545	P97379;A0A0J9YTQ8;A0A0J9YUY8	P97379;A0A0J9YTQ8;A0A0J9YUY8	Ras GTPase-activating protein-binding protein 2	G3bp2
17.9524	16.8795	16.617	16.7449	16.789	18.6197		1.2505	19.3161	0.0074349	0.0908482	0.288405	P97384	P97384	Annexin A11	Anxa11
18.1922	17.6254	19.7159	19.7217	17.5485	15.2807		41.541	20.8642	0	0.482265	-1.49416	P97807	P97807	Fumarate hydratase, mitochondrial	Fh
18.6446	16.8601	22.4304	22.4094	22.102	22.3565	+	142.04	23.9117	0	1.41768	4.47688	P97855	P97855	Ras GTPase-activating protein-binding protein 1	G3bp1
24.5706	24.6358	26.3962	26.4486	26.0896	26.0574	+	323.31	28.0314	0	3.2137	1.47025	P99024;A0A1D5RM76	P99024	Tubulin beta-5 chain	Tubb5
18.0653	17.9464	19.0159	18.9304	18.9913	18.9719	+	1.9995	21.3695	0	2.42133	0.975685	P99026	P99026	Proteasome subunit beta type-4	Psmb4
17.739	18.0319	19.569	19.5283	19.5461	19.6794	+	6.0444	22.1843	0	2.06723	1.72733	P99029;G3UZJ4;H3BJQ7	P99029;G3UZJ4;H3BJQ7	Peroxiredoxin-5, mitochondrial	Prdx5
18.8219	16.2307	17.0033	18.5626	17.7714	16.0401		1.3589	19.2196	0.0038226	0.137319	-0.620596	Q00493	Q00493	Carboxypeptidase E	Cpe
17.898	17.7879	26.5393	26.5109	24.8174	24.9259	+	323.31	27.7121	0	3.91797	7.02873	Q01149;E0CXI2	Q01149	Collagen alpha-2(I) chain	Col1a2
25.4912	25.4758	20.7778	20.351	22.3102	22.4822	+	259.29	24.4963	0	3.10745	-3.08732	Q01320	Q01320	DNA topoisomerase 2-alpha	Top2a
23.1995	23.4501	22.7082	22.509	22.9267	23.0433		323.31	24.6804	0	0.875617	-0.339786	Q01853	Q01853	Transitional endoplasmic reticulum ATPase	Vcp
24.0959	23.7811	22.4888	22.4439	23.1535	23.1252		175.94	24.7538	0	1.43232	-0.799125	Q02053;P31254	Q02053	Ubiquitin-like modifier-activating enzyme 1	Uba1
17.1198	17.9043	23.4746	23.5252	20.9899	20.4684	+	87.731	24.4182	0	1.68253	3.21709	Q02819;A0A1C7CYU3;A0A1B0GR92;A0A1B0GR41;A0A1B0GS16;A0A1B0GT83	Q02819;A0A1C7CYU3;A0A1B0GR92;A0A1B0GR41	Nucleobindin-1	Nucb1
23.8988	24.056	24.7629	24.6484	24.4717	24.6301		323.31	26.4027	0	1.44598	0.573488	Q03265;D3Z6F5;D6RJ16	Q03265;D3Z6F5	ATP synthase subunit alpha, mitochondrial;ATP synthase subunit alpha	Atp5a1
17.677	18.0099	19.6188	16.9864	18.1164	17.3214		16.649	20.3736	0	0.0970582	-0.124588	Q03350	Q03350	Thrombospondin-2	Thbs2
23.7576	23.6024	22.0754	22.2261	22.6725	22.6333	+	227.19	24.5153	0	2.22086	-1.02711	Q04750;Q8R4U6	Q04750	DNA topoisomerase 1	Top1
17.8301	17.1374	17.711	16.4698	17.0366	16.8747		18.624	19.2322	0	0.559285	-0.528095	Q04857	Q04857	Collagen alpha-1(VI) chain	Col6a1
19.1432	18.1008	19.6918	16.482	17.1531	17.1181		13.718	20.3122	0	0.982115	-1.48641	Q05186	Q05186	Reticulocalbin-1	Rcn1
21.7159	21.5919	20.062	20.1581	20.1951	20.7768	+	13.999	23.1049	0	1.22805	-1.16796	Q05816	Q05816	Fatty acid-binding protein, epidermal	Fabp5
18.3297	17.3759	17.8726	19.4255	16.6924	16.199		3.574	20.2658	0	0.920954	-1.40705	Q05CL8;A2AMD0	Q05CL8	La-related protein 7	Larp7
18.0845	17.5694	20.6096	20.4526	20.904	20.1594	+	6.9022	22.2076	0	1.5705	2.70475	Q05D44	Q05D44	Eukaryotic translation initiation factor 5B	Eif5b
17.5692	19.411	17.4065	19.761	19.4262	20.0634		5.8161	22.0948	0	0.485768	1.25475	Q06185	Q06185	ATP synthase subunit e, mitochondrial	Atp5i
17.1933	17.2268	17.8226	15.6372	16.8972	18.0031		3.0132	18.1167	0	0.150796	0.240076	Q07417	Q07417	Short-chain specific acyl-CoA dehydrogenase, mitochondrial	Acads
19.9587	19.8524	20.657	20.4333	20.6012	20.3885		92.288	22.6032	0	1.41578	0.589272	Q08093;D3Z7R6	Q08093;D3Z7R6	Calponin-2;Calponin	Cnn2
18.0974	18.9157	20.2225	20.2209	20.1057	20.1294	+	47.051	21.8556	0	1.22986	1.611	Q08288;D3Z5X8;D3Z7N3;D3Z345	Q08288	Cell growth-regulating nucleolar protein	Lyar
23.5835	23.5634	21.7942	22.0816	22.3558	22.5627	+	88.813	24.1127	0	2.06567	-1.11417	Q80XR6;Q20BD0;Q99020	Q80XR6;Q20BD0;Q99020	Heterogeneous nuclear ribonucleoprotein A/B	Hnrnpab
17.9296	17.3903	19.214	19.1656	18.0265	18.9785		2.85	20.5911	0	0.579383	0.842622	Q31125	Q31125	Zinc transporter SLC39A7	Slc39a7
16.7834	17.4309	17.3544	17.4307	16.3647	17.0145		1.7979	17.3496	0.00083612	0.338442	-0.417555	Q3TA68;Q3TAQ9	Q3TA68;Q3TAQ9		Wdr36
22.0345	22.0411	16.6122	15.2711	17.9351	17.394	+	29.621	20.464	0	2.41964	-4.37323	Q3TE40;Q62193	Q3TE40;Q62193	Replication protein A 32 kDa subunit	Rpa2
26.2408	26.3035	22.4382	22.3597	24.0436	23.9384	+	91.565	25.721	0	3.14289	-2.28113	Z4YKB8;Q3TEA8;Z4YKA3;A2AM65;A2AM63;A2AM69	Z4YKB8;Q3TEA8;Z4YKA3;A2AM65	Heterochromatin protein 1-binding protein 3	Hp1bp3
18.7123	16.9124	21.4281	21.0657	21.4933	21.2612	+	12.885	22.8033	0	1.22841	3.56486	Q3TGG2	Q3TGG2		Atxn2l
18.1112	17.1517	16.7977	20.2824	15.9525	19.9913		51.612	22.2097	0	0.0531627	0.340468	Q6ZWQ9;Q3THE2;D3YV37;Q9CQ19;D3Z249	Q6ZWQ9;Q3THE2;D3YV37;Q9CQ19	Myosin regulatory light chain 12B;Myosin regulatory light polypeptide 9	Myl12a;Myl12b;Myl9
23.2532	23.3578	20.6145	20.9021	21.5393	21.9766	+	67.427	23.2547	0	1.68915	-1.54753	Q3THK7	Q3THK7	GMP synthase [glutamine-hydrolyzing]	Gmps
17.0944	16.9376	17.5438	19.9641	19.6661	19.6072	+	26.518	20.8522	0	2.99147	2.62068	Q3TIV5	Q3TIV5	Zinc finger CCCH domain-containing protein 15	Zc3h15
19.2275	17.4669	19.7107	15.4132	18.1265	16.7922		1.6219	20.0006	0.0024351	0.295963	-0.887834	Q3TJD7;B8JJB2;B8JJB3;Q8BVJ7	Q3TJD7;B8JJB2;B8JJB3;Q8BVJ7	PDZ and LIM domain protein 7	Pdlim7
18.9972	20.0846	17.7627	16.1824	17.5917	15.8351		1.5722	18.4824	0.0032026	0.952467	-2.82748	Q3TJM4	Q3TJM4	Centromere protein T	Cenpt
17.8774	17.7215	18.9193	16.9773	18.4991	13.9549		18.204	19.8551	0	0.251309	-1.57245	Q3TJZ6	Q3TJZ6	Protein FAM98A	Fam98a
17.8599	18.202	19.5496	19.5696	19.7253	19.998	+	39.963	21.256	0	1.85462	1.83068	Q3TKD0;Q8BFY9;J3QMX2;Q99LG2;E9PV58	Q3TKD0;Q8BFY9;J3QMX2;Q99LG2	Transportin-1;Transportin-2	Tnpo1;Tnpo2
17.2626	17.5868	19.0044	14.1669	15.8143	16.6026		3.6503	19.4424	0	0.983022	-1.21623	Q8BPW9;Q3TVK3;Q9Z2W0	Q8BPW9;Q3TVK3;Q9Z2W0	Aspartyl aminopeptidase	Dnpep
20.652	17.2402	21.2165	21.3487	20.89	21.0294		8.4768	22.8557	0	0.444254	2.01357	Q3TW96;A0A0R4J1F6;A0A0R4J085;Q3UHZ7;Q91YN5	Q3TW96	UDP-N-acetylhexosamine pyrophosphorylase-like protein 1	Uap1l1
18.7364	18.3903	18.1017	20.7293	20.8489	20.7314	+	3.1254	22.3649	0	2.17598	2.22679	Q3TWW8;Q9D8S5;Q542V3;O35326;Q8VE97	Q3TWW8;Q9D8S5;Q542V3;O35326;Q8VE97	Serine/arginine-rich splicing factor 6;Serine/arginine-rich splicing factor 5;Serine/arginine-rich splicing factor 4	Srsf6;Srsf5;Srsf4
17.1607	17.4091	17.0409	16.4249	16.9687	19.5666		3.8878	19.3616	0	0.275771	0.982784	Q3TXS7	Q3TXS7	26S proteasome non-ATPase regulatory subunit 1	Psmd1
18.0277	16.5826	17.1553	16.6771	17.0306	15.5205		1.5022	16.564	0.0031546	0.368175	-1.02962	Q3TXV4;Q921E2	Q3TXV4;Q921E2	Ras-related protein Rab-31	Rab31
21.7282	22.268	16.7027	14.243	20.6286	20.5217	+	12.665	21.5354	0	1.45093	-1.42293	Q3U1J4	Q3U1J4	DNA damage-binding protein 1	Ddb1
22.6231	22.4318	21.293	21.3753	21.9193	21.8466		167.56	23.5861	0	1.6144	-0.644484	Q3U2G2;Q61316;A0A0N4SVU2	Q3U2G2;Q61316	Heat shock 70 kDa protein 4	Hspa4
20.9518	20.8164	19.8807	20.0158	20.4923	20.2497		52.126	22.0317	0	1.17982	-0.513157	Q3U741;Q501J6;Q3TU25	Q3U741;Q501J6;Q3TU25	Probable ATP-dependent RNA helicase DDX17	Ddx17
18.028	17.1744	20.4885	20.3013	20.0531	20.5254	+	15.045	21.9476	0	1.50329	2.68809	Q3U7R1;A0A1W2P784	Q3U7R1;A0A1W2P784	Extended synaptotagmin-1	Esyt1
16.8351	17.337	19.318	16.6263	16.4825	16.4464		5.4092	20.2312	0	0.879135	-0.621599	Q3U962	Q3U962	Collagen alpha-2(V) chain	Col5a2
17.6393	18.7315	16.9039	18.4566	16.7032	16.36		1.3751	20.0856	0.0038314	0.992121	-1.65375	Q3U9G9;A0A0A6YY12	Q3U9G9;A0A0A6YY12	Lamin-B receptor	Lbr
17.0594	17.8675	17.5606	17.5214	17.1698	16.3598		3.6572	19.6308	0	0.460394	-0.69863	Q3UDM0;Q921Y0;Q8BPB0	Q3UDM0;Q921Y0;Q8BPB0	MOB kinase activator 1A;MOB kinase activator 1B	Mob1b;Mob1a
19.2169	17.6071	16.3808	18.0416	17.4018	17.3266		2.6237	18.365	0	0.490603	-1.04777	S4R1I3;Q3UE92;Q6P1B1	S4R1I3;Q3UE92;Q6P1B1	Xaa-Pro aminopeptidase 1	Xpnpep1
17.8273	17.0599	17.9235	18.5388	16.2735	17.0812		1.894	18.1975	0	0.518859	-0.766243	Q3UEB3	Q3UEB3	Poly(U)-binding-splicing factor PUF60	Puf60
18.2859	16.6607	17.6186	19.1822	16.3421	15.9452		2.1299	17.3901	0	0.597095	-1.32967	Q3UF75;Q9EPC1	Q3UF75;Q9EPC1	Alpha-parvin	Parva
17.3515	17.6209	21.6354	21.5883	22.0512	21.8673	+	227.99	23.3531	0	2.87721	4.47304	Q5SV64;Q3UH59;Q61879	Q5SV64;Q3UH59;Q61879	Myosin-10	Myh10
19.459	19.209	18.4567	18.6329	18.9175	18.9884		3.4815	21.6209	0	1.00301	-0.38106	Q3UHX2	Q3UHX2	28 kDa heat- and acid-stable phosphoprotein	Pdap1
17.6157	17.4426	19.1365	18.9481	17.0523	15.6427		107.05	20.0114	0	0.623394	-1.18163	Q3UJQ9;Q9D0K2	Q3UJQ9;Q9D0K2	Succinyl-CoA:3-ketoacid-coenzyme A transferase;Succinyl-CoA:3-ketoacid coenzyme A transferase 1, mitochondrial	Oxct1
17.8764	16.2254	15.9759	16.9605	17.7374	17.7003		1.1322	19.3781	0.0094203	0.297995	0.667897	Q3UKJ7	Q3UKJ7	WD40 repeat-containing protein SMU1;WD40 repeat-containing protein SMU1, N-terminally processed	Smu1
18.0479	18.2738	18.1116	17.4947	18.2177	15.7063		4.2367	18.4125	0	0.354562	-1.19887	Q3UM45	Q3UM45	Protein phosphatase 1 regulatory subunit 7	Ppp1r7
18.6782	17.6355	22.5682	22.6324	22.4461	22.41	+	29.409	24.0561	0	1.83596	4.2712	Q3UMP4;Q9CY58;A0A0N4SV32;A0A0N4SWH2;A0A0N4SVK5;A0A0N4SUQ1;A0A0N4SUN8;A0A0N4SV40	Q3UMP4;Q9CY58;A0A0N4SV32;A0A0N4SWH2	Plasminogen activator inhibitor 1 RNA-binding protein	Serbp1
20.6567	20.336	17.5862	15.9611	19.1298	19.278	+	2.6498	20.1111	0	1.74063	-1.29253	Q3UMU9	Q3UMU9	Hepatoma-derived growth factor-related protein 2	Hdgfrp2
19.7333	20.8291	18.4776	16.8677	15.9539	16.5037	+	2.6843	19.2705	0	1.65514	-4.05245	Q3UPE3	Q3UPE3	RecQ-mediated genome instability protein 2	Rmi2
16.5524	16.5557	19.0571	16.4724	17.6497	16.6275		54.989	19.5448	0	0.430471	0.584606	S4R2A9;Q3UPL0;S4R256	S4R2A9;Q3UPL0	Protein transport protein Sec31A	Sec31a
16.9294	18.821	15.8402	17.459	16.2152	23.4486		1.3367	24.8899	0.0053232	0.185151	1.95668	Q3UV17	Q3UV17	Keratin, type II cytoskeletal 2 oral	Krt76
17.7519	22.3069	16.9742	15.5269	23.3835	23.3968		49.044	23.8902	0	0.555902	3.36075	Q3UXU8;Q8K2X3;S4R297	Q3UXU8;Q8K2X3	CST complex subunit STN1	Obfc1
17.0364	18.5764	20.4064	20.2642	20.4484	20.9603	+	21.653	22.0517	0	1.15338	2.89796	Q3UZ39	Q3UZ39	Leucine-rich repeat flightless-interacting protein 1	Lrrfip1
21.2789	21.0632	21.1434	21.1749	21.6241	21.628		35.939	23.1642	0	1.28514	0.454965	Q3V117;Q91V92;Q3TS02	Q3V117;Q91V92;Q3TS02	ATP-citrate synthase	Acly
19.3978	19.6009	19.7146	19.7001	19.6328	19.5466		69.756	21.6188	0	0.302324	0.0904207	Q3V3R1	Q3V3R1	Monofunctional C1-tetrahydrofolate synthase, mitochondrial	Mthfd1l
16.5908	17.3872	17.035	19.3316	18.9251	17.9823		2.0794	21.6921	0	0.851017	1.46468	Q3ZB59;Q3ZB57;Q9Z1S8	Q3ZB59;Q3ZB57;Q9Z1S8	GRB2-associated-binding protein 2	Gab2
16.7193	17.3687	16.4966	15.292	20.0069	16.5931		1.191	22.1066	0.0095029	0.263706	1.25598	Q4U4S6	Q4U4S6	Xin actin-binding repeat-containing protein 2	Xirp2
18.0831	16.7343	19.7096	15.9191	19.952	15.6273		13.123	21.5008	0	0.0545775	0.38096	Q4VAA2;A0A087WS49;A0A087WNP6;F8WGL9;A0A087WRM0	Q4VAA2;A0A087WS49;A0A087WNP6	Protein CDV3	Cdv3
23.3924	23.2371	16.7134	15.4165	18.0537	21.0018		56.232	22.2548	0	0.905733	-3.78701	Q505F1	Q505F1	Nuclear receptor subfamily 2 group C member 1	Nr2c1
18.5984	18.2995	17.3997	20.208	17.2637	14.9636		96.721	21.3045	0	0.740758	-2.33534	Q50HX3;Q91V41;A0A2R8VHW9	Q50HX3;Q91V41	Ras-related protein Rab-14	Rab14
26.4008	26.2356	22.2129	22.034	24.9302	25.0779	+	95.037	26.1595	0	2.15299	-1.31418	Q52KC3;P49718	Q52KC3;P49718	DNA helicase;DNA replication licensing factor MCM5	Mcm5
24.0148	23.7774	16.2912	16.6549	25.9185	25.9368	+	297.89	26.3888	0	2.46635	2.03161	Q5EE38;A0A1D5RLA2;A0A1D5RM77;A0A1D5RLU6	Q5EE38;A0A1D5RLA2	Adrenocortical dysplasia protein	Acd
19.1532	16.6261	21.0305	20.9097	20.7462	20.7539		58.026	22.3788	0	0.818465	2.86038	Q5F2E7	Q5F2E7	Nuclear fragile X mental retardation-interacting protein 2	Nufip2
17.5061	17.5468	21.6489	21.6709	21.4161	21.2166	+	22.393	23.044	0	3.14243	3.78988	Q5SF07;A6X8Z3	Q5SF07;A6X8Z3	Insulin-like growth factor 2 mRNA-binding protein 2	Igf2bp2
17.285	16.824	16.3586	16.9642	16.4585	16.3937		2.2012	14.3552	0	0.942509	-0.628425	Q5SQ20;Q9EQ61	Q5SQ20;Q9EQ61	Pescadillo homolog	Pes1
25.4946	25.2786	24.8833	25.0889	24.8722	25.1386		176.75	27.0468	0	0.806125	-0.381181	Q9DAY9;Q5SQB0;Q5SQB5;Q61937	Q9DAY9;Q5SQB0;Q5SQB5;Q61937	Nucleophosmin	Npm1
17.3259	17.5471	17.0563	14.5582	15.9688	16.9792		1.1418	16.5832	0.0094408	0.690888	-0.962533	Q5SUF2	Q5SUF2	Luc7-like protein 3	Luc7l3
22.5196	22.4054	19.931	16.4007	23.8789	25.0003	+	232.76	24.7991	0	1.13945	1.97708	Q5SUQ9	Q5SUQ9	CST complex subunit CTC1	Ctc1
18.5224	16.2804	17.7293	17.6078	16.2211	18.5042		6.5297	19.5501	0	0.00749956	-0.038743	Q5SUR0;G3UY86;F6RUL9	Q5SUR0;G3UY86;F6RUL9	Phosphoribosylformylglycinamidine synthase	Pfas
16.5834	17.1344	18.2012	17.1877	17.7491	18.9514		5.235	20.6823	0	0.815939	1.49138	Q5SUT0;Q5SUS9;Q61545	Q5SUT0;Q5SUS9;Q61545	RNA-binding protein EWS	Ewsr1
16.0333	16.5185	15.9773	16.3706	17.978	16.6923		51.777	18.5308	0	0.579913	1.05931	Q5SVX2;Q9D0R4	Q5SVX2;Q9D0R4	Probable ATP-dependent RNA helicase DDX56	Ddx56
23.9477	23.0067	19.3231	19.706	20.1981	20.2484	+	168.21	22.7805	0	1.69189	-3.25397	Q5SWN2;Q8VEE4	Q5SWN2;Q8VEE4	Replication protein A 70 kDa DNA-binding subunit;Replication protein A 70 kDa DNA-binding subunit, N-terminally processed	Rpa1
25.2318	25.0216	17.6432	19.0922	17.3223	16.9649	+	135.1	23.7189	0	3.17154	-7.98309	Q5SWU9;V9GWS0;D3Z0B3;A0A0R4J1S9;V9GWR9;V9GWS1;V9GXY1	Q5SWU9	Acetyl-CoA carboxylase 1;Biotin carboxylase	Acaca
18.2855	18.8097	16.2339	17.4176	16.052	18.1354		15.202	19.4289	0	0.510636	-1.45389	Q5SX46;Q9CR62	Q5SX46;Q9CR62	Mitochondrial 2-oxoglutarate/malate carrier protein	Slc25a11
22.5112	21.7946	23.2636	23.1221	23.0391	23.1487		323.31	24.9024	0	0.914259	0.941021	Q5SXR6;Q68FD5;F6Z1R4	Q5SXR6;Q68FD5	Clathrin heavy chain;Clathrin heavy chain 1	Cltc
17.1088	17.334	19.4388	19.3675	15.843	19.1933		6.0083	20.5891	0	0.0575097	0.296779	Q921L6;Q60598	Q921L6;Q60598	Src substrate cortactin	Cttn
18.1854	17.821	19.0169	19.3633	19.2053	19.2635	+	4.58	21.6279	0	1.66289	1.23117	Q60692	Q60692	Proteasome subunit beta type-6	Psmb6
18.8651	21.3854	18.0401	16.112	16.8172	15.3672	+	19.303	20.0554	0	0.962204	-4.03305	Q60848;D3Z414	Q60848	Lymphocyte-specific helicase	Hells
20.9227	21.1843	20.8269	20.7799	20.4419	20.5793		5.6435	22.5008	0	1.17561	-0.542867	Q60854;E9PYY0;E9Q3Y1;E9Q6X2;E9Q108;E9Q0P9;K7E6F1;F8WIV2;E9Q5Q5;E9PZQ9;E9Q4R2	Q60854;E9PYY0;E9Q3Y1;E9Q6X2;E9Q108;E9Q0P9;K7E6F1;F8WIV2	Serpin B6	Serpinb6;Serpinb6a
21.8736	22.184	23.0328	22.825	22.8223	22.7436		129.56	24.5294	0	1.37426	0.754147	Q60864	Q60864	Stress-induced-phosphoprotein 1	Stip1
19.4361	16.8288	20.5173	20.753	20.9881	21.0211		20.43	22.359	0	0.800021	2.87214	Q60865	Q60865	Caprin-1	Caprin1
17.4835	17.1093	21.1732	21.5917	21.1212	21.5651	+	100.6	23.7694	0	2.29183	4.04675	Q8BMJ3;Q60872;Q3UTA4;Q3TQZ4;J3QQ02;J3QPI8;J3QP87;J3QNT6;A0A1Y7VNG9;A0A1Y7VLT7;A0A1Y7VK80;A0A1Y7VJE9;Q8BX20;Q3UT53;J3QMW5	Q8BMJ3;Q60872;Q3UTA4;Q3TQZ4;J3QQ02;J3QPI8;J3QP87;J3QNT6;A0A1Y7VNG9;A0A1Y7VLT7;A0A1Y7VK80;A0A1Y7VJE9	Eukaryotic translation initiation factor 1A, X-chromosomal;Eukaryotic translation initiation factor 1A	Eif1ax;Eif1a;Gm8300;Gm2016;Gm2056;Gm6803;Gm2035;Gm5039
20.3803	19.6515	21.7772	21.6381	21.7219	21.7803	+	144.03	23.8427	0	1.38066	1.73523	Q60932;F2Z471	Q60932;F2Z471	Voltage-dependent anion-selective channel protein 1	Vdac1
24.1204	24.2305	17.264	17.1826	17.1234	15.9393	+	78.119	22.925	0	2.22208	-7.64411	Q60953;D3Z3A6;D3YXR5;F7BTZ2;D3Z2V0;D6RII9	Q60953;D3Z3A6;D3YXR5;F7BTZ2	Protein PML	Pml
24.59	24.6821	16.473	20.9195	22.1437	22.7913	+	15.262	24.2113	0	1.65758	-2.16858	Q60972	Q60972	Histone-binding protein RBBP4	Rbbp4
22.4466	22.5143	16.2398	16.3747	19.7881	20.1868	+	21.876	21.9986	0	2.18615	-2.49305	Q60973;A2AFI9;A2AFJ1;F6ZLC6;F6U539	Q60973;A2AFI9;A2AFJ1	Histone-binding protein RBBP7	Rbbp7
17.6373	17.3862	17.7409	17.162	16.6	16.9091		8.0513	16.8208	0	1.20253	-0.757165	Q61001	Q61001	Laminin subunit alpha-5	Lama5
17.9924	17.5683	20.37	20.4975	20.2538	20.5638	+	88.75	22.0305	0	2.00708	2.62851	Q61024;D3Z0C2;D3YYR0	Q61024	Asparagine synthetase [glutamine-hydrolyzing]	Asns
25.3553	25.5096	24.2426	24.3215	24.1684	24.2198	+	242.12	26.1006	0	2.36814	-1.23836	Q61029	Q61029	Lamina-associated polypeptide 2, isoforms beta/delta/epsilon/gamma	Tmpo
20.1478	20.2728	17.9657	17.3132	19.3931	15.6082		1.7372	19.9052	0.00082988	0.539521	-2.70963	Q61033	Q61033	Lamina-associated polypeptide 2, isoforms alpha/zeta	Tmpo
17.757	18.2376	17.3215	19.6318	17.2934	19.2946		39.93	21.1275	0	0.0968027	0.296756	Q61035	Q61035	Histidine--tRNA ligase, cytoplasmic	Hars
17.0679	19.3582	20.5499	20.5094	20.2525	20.3243		123.79	22.0405	0	0.67413	2.07535	Q61081;A0A1L1STC0	Q61081;A0A1L1STC0	Hsp90 co-chaperone Cdc37;Hsp90 co-chaperone Cdc37, N-terminally processed	Cdc37
20.7416	15.9801	20.1027	20.226	19.8675	20.0474		69.104	21.9952	0	0.24277	1.59661	Q61166	Q61166	Microtubule-associated protein RP/EB family member 1	Mapre1
20.7373	20.9699	20.9339	21.1065	20.9021	20.7425		22.769	23.4759	0	0.0731504	-0.0313082	Q61171;D3Z4A4	Q61171;D3Z4A4	Peroxiredoxin-2	Prdx2
19.2041	20.7679	16.0736	15.1455	18.3216	16.6371		27.555	19.0172	0	0.793341	-2.50665	Q61216;B2KF76;A0A1L1SQT7;F6RX99	Q61216;B2KF76	Double-strand break repair protein MRE11A	Mre11a
20.4647	20.5629	21.8048	21.7243	21.1581	21.2299	+	15.184	23.5317	0	2.10219	0.680185	Q61335	Q61335	B-cell receptor-associated protein 31	Bcap31
16.7147	16.3805	23.7873	23.6134	21.9271	22.1258	+	174.96	24.7737	0	2.90075	5.47885	Q61398;D3YUE2;A0A0G2JE29;D3YZE3;D3YWH0	Q61398;D3YUE2;A0A0G2JE29;D3YZE3	Procollagen C-endopeptidase enhancer 1	Pcolce
18.6076	18.3813	15.8684	16.2174	16.4964	16.8845	+	3.1539	16.84	0	1.81943	-1.80403	Q61550	Q61550	Double-strand-break repair protein rad21 homolog	Rad21
21.743	22.0692	23.1181	23.0513	23.0831	22.9118	+	162.94	24.8058	0	1.56336	1.09133	Q61553;A0A0G2JDU7;F7BDR1	Q61553;A0A0G2JDU7	Fascin	Fscn1
17.3039	17.2539	19.8366	19.8794	16.6824	16.3553		2.1348	20.7556	0	1.35395	-0.76008	Q61554	Q61554	Fibrillin-1	Fbn1
18.7884	16.4941	16.8254	16.3018	17.1079	16.3678		40.02	19.4786	0	0.274305	-0.903408	Q61555	Q61555	Fibrillin-2	Fbn2
20.4778	20.3369	22.7405	21.6885	21.5939	21.7145	+	128.6	23.7337	0	2.26074	1.24682	Q61598;A0A1Y7VL99;A0A1Y7VLG4	Q61598;A0A1Y7VL99	Rab GDP dissociation inhibitor beta	Gdi2
17.3024	16.0209	17.1262	15.3077	17.2818	19.2065		75.029	20.5429	0	0.516366	1.58251	Q8R3C7;Q8BZY3;Q61655;Q9QY15	Q8R3C7;Q8BZY3;Q61655	ATP-dependent RNA helicase DDX19A	Ddx19b;Ddx19a
23.2611	23.8028	22.5278	22.5628	22.8009	22.8334		28.27	24.5228	0	0.924748	-0.714843	Q8BTS0;Q61656;S4R1I6;B1ARB9;B1ARC0	Q8BTS0;Q61656;S4R1I6	Probable ATP-dependent RNA helicase DDX5	Ddx5
25.2398	25.2795	18.9586	19.5595	21.2127	21.4843	+	29.224	24.42	0	2.91032	-3.91112	Q61686;D3Z0U2	Q61686	Chromobox protein homolog 5	Cbx5
26.7299	26.6217	16.612	17.5717	23.7972	23.7268	+	323.31	25.5668	0	3.30979	-2.91379	Q61687;F6RDB7;Q8C2S3;A0A0G2JFA5;Q3UY26;A0A0G2JFG6;A0A0G2JF42;A0A0G2JGH3;A6PWK7;A6PWK8;A0A0G2JED2;A6PWK9;Q3TA30;A0A0G2JF35;A0A0G2JFR8	Q61687	Transcriptional regulator ATRX	Atrx
23.0693	22.9121	24.2745	24.2144	23.8137	23.9726	+	226.45	25.7828	0	1.82398	0.902469	Q61753;F6ZSB7	Q61753	D-3-phosphoglycerate dehydrogenase	Phgdh
18.1592	16.1574	20.4598	20.5698	20.693	20.8056	+	42.48	22.2217	0	1.15573	3.59103	Q61768;E9QAK5;P33175	Q61768;E9QAK5	Kinesin-1 heavy chain;Kinesin-like protein	Kif5b
26.7779	26.8328	22.868	23.2247	25.3165	25.4741	+	323.31	26.6262	0	2.45776	-1.41006	Q61881;D3Z6N3;D3Z335;D3Z0J6;D3Z2K9	Q61881	DNA replication licensing factor MCM7	Mcm7
17.8065	17.6057	17.2932	19.0855	17.4028	15.5023		33.089	19.9614	0	0.494961	-1.25356	Q62009	Q62009	Periostin	Postn
17.7367	18.153	18.3032	16.7458	17.8437	15.1271		3.8628	17.3158	0	0.398497	-1.45942	Q62084	Q62084	Protein phosphatase 1 regulatory subunit 14B	Ppp1r14b
21.0171	20.8336	20.2923	20.0891	20.0355	20.4584		4.5715	22.4601	0	1.00582	-0.678361	Q62093	Q62093	Serine/arginine-rich splicing factor 2	Srsf2
18.4169	18.7421	19.4524	19.6485	19.2174	15.2727		4.5374	21.5834	0	0.244416	-1.33444	Q9QUI0;Q62159;H3BL56;A0A0A6YXF6;A0A0A6YWJ1;A0A0G2JEP8;Q9CR99;P62746	Q9QUI0;Q62159;H3BL56;A0A0A6YXF6;A0A0A6YWJ1;A0A0G2JEP8;Q9CR99	Transforming protein RhoA;Rho-related GTP-binding protein RhoC	Rhoa;Rhoc;4930544G11Rik
17.9721	16.9929	23.4196	23.3452	22.9068	23.0654	+	119.13	24.7414	0	2.09567	5.5036	Q62167;P16381;Q62095;Q3V086;Q61496	Q62167;P16381;Q62095	ATP-dependent RNA helicase DDX3X;Putative ATP-dependent RNA helicase Pl10;ATP-dependent RNA helicase DDX3Y	Ddx3x;D1Pas1;Ddx3y
20.7908	20.4199	21.4136	21.5716	21.3913	21.2482		28.06	23.8792	0	1.15829	0.714425	Q9D8L3;Q62186	Q9D8L3;Q62186	Translocon-associated protein subunit delta	Ssr4
26.6999	26.5986	22.7905	22.701	24.5894	24.5453	+	323.31	26.0721	0	3.15301	-2.08186	Q62318	Q62318	Transcription intermediary factor 1-beta	Trim28
16.3455	16.7581	19.7053	16.395	15.769	16.0609		11.502	20.7463	0	0.893096	-0.636845	Q62356	Q62356	Follistatin-related protein 1	Fstl1
18.5901	16.8016	18.404	18.4394	18.4437	16.8752		3.0261	20.577	0	0.0094845	-0.0363455	Q62426	Q62426	Cystatin-B	Cstb
18.4585	18.0722	19.4822	19.6169	19.4081	19.3825	+	3.1283	21.4321	0	1.55106	1.12993	Q62446;A0A1Y7VP01;A0A1Y7VMJ9;A0A1Y7VLK0	Q62446;A0A1Y7VP01	Peptidyl-prolyl cis-trans isomerase FKBP3	Fkbp3
18.9515	16.013	20.2553	20.7007	17.2457	13.9959		4.5958	21.597	0	0.314283	-1.86142	Q62465	Q62465	Synaptic vesicle membrane protein VAT-1 homolog	Vat1
17.5258	15.4288	21.3022	21.3864	21.0148	20.9381	+	5.5788	22.7132	0	1.29829	4.49915	Q7TQE2;Q62523;A0A0N4SVD2;A0A0N4SUX7;A0A0N4SVP4	Q7TQE2;Q62523	Zyxin	Zyx
17.667	17.8206	19.1391	16.7236	17.2286	16.3093		3.7187	20.3277	0	0.765566	-0.974834	Q63870	Q63870	Collagen alpha-1(VII) chain	Col7a1
18.8557	16.5709	16.5102	15.9792	17.7462	17.8682		12.62	19.2573	0	0.025912	0.0938663	Q640M1	Q640M1	U3 small nucleolar RNA-associated protein 14 homolog A	Utp14a
17.4057	17.7143	23.9138	23.8422	22.8026	22.8111	+	323.31	25.2053	0	3.06322	5.24678	Q640N1;A0A0R4J0C4;Q9D2L5	Q640N1	Adipocyte enhancer-binding protein 1	Aebp1
18.6691	18.4361	19.2207	21.5886	16.7919	20.9815		73.072	22.9494	0	0.0515398	0.334126	Q64152	Q64152	Transcription factor BTF3	Btf3
18.3522	19.0425	19.9953	20.1331	16.9376	19.9332		111.51	21.7288	0	0.0553499	-0.261986	Q64310;E0CXD9;F7CH13	Q64310;E0CXD9	Surfeit locus protein 4	Surf4
19.779	20.77	18.9972	18.7742	18.853	18.9361		13.09	21.4184	0	0.962488	-1.37996	Q64433	Q64433	10 kDa heat shock protein, mitochondrial	Hspe1
22.5225	22.4842	19.8122	19.5769	20.8441	21.196	+	25.135	22.3673	0	1.85555	-1.48332	Q64511;F6U5K2	Q64511	DNA topoisomerase 2-beta	Top2b
26.1403	26.5091	24.5754	24.2991	24.601	24.8308	+	27.424	27.1035	0	1.75068	-1.60882	Q64523;Q6GSS7	Q64523;Q6GSS7	Histone H2A type 2-C;Histone H2A type 2-A	Hist2h2ac;Hist2h2aa1
23.6993	23.6386	24.8702	24.7873	24.9968	24.8324	+	323.31	26.5931	0	2.30877	1.24565	Q64727;A0A286YDJ4	Q64727	Vinculin	Vcl
18.1794	16.9689	16.6929	18.4622	16.7381	16.5676		9.8302	18.3811	0	0.567467	-0.921305	Q64737	Q64737	Trifunctional purine biosynthetic protein adenosine-3;Phosphoribosylamine--glycine ligase;Phosphoribosylformylglycinamidine cyclo-ligase;Phosphoribosylglycinamide formyltransferase	Gart
16.6478	17.1322	18.1043	16.3883	15.8739	14.0739		1.4841	19.4238	0.0031274	0.7542	-1.9161	Q6A028	Q6A028	Switch-associated protein 70	Swap70
20.2103	17.5093	20.1834	20.3742	19.559	19.8132		8.5776	21.5477	0	0.218682	0.826306	Q6A0A9	Q6A0A9	Constitutive coactivator of PPAR-gamma-like protein 1	FAM120A
20.06	20.736	25.0939	25.2766	24.3366	24.3524	+	323.31	26.446	0	2.13905	3.94648	Q6DFW4;A0A0A0MQ76;A0A087WQ46;A0A087WSU5;A0A087WSL8;A0A087WP00;A0A087WNW0	Q6DFW4;A0A0A0MQ76	Nucleolar protein 58	Nop58
18.3533	17.2593	22.0198	22.0343	21.8597	21.9412	+	91.967	23.5621	0	1.75746	4.09414	Q6GQT9	Q6GQT9	Nodal modulator 1	Nomo1
21.9672	21.8264	22.365	22.0381	22.2685	22.2317		69.702	24.3776	0	1.39902	0.353351	Q6IRU2	Q6IRU2	Tropomyosin alpha-4 chain	Tpm4
19.2028	19.18	17.2818	17.1377	17.362	18.7202		12.581	19.213	0	0.633729	-1.15034	Q6KCD5	Q6KCD5	Nipped-B-like protein	Nipbl
18.4639	17.0964	17.4006	17.3087	17.0704	16.5157		1.2019	15.8381	0.0095099	0.504748	-0.987133	Q6NSR8	Q6NSR8	Probable aminopeptidase NPEPL1	Npepl1
22.1446	22.0394	17.8338	16.8152	23.7889	23.5827	+	223.15	23.9709	0	2.28133	1.59374	Q6NZQ4;A0A0G2JE02	Q6NZQ4	PAX-interacting protein 1	Paxip1
18.4936	19.4203	15.7957	16.7601	17.0786	19.1341		2.7941	17.4867	0	0.276313	-0.850595	Q6P1D7	Q6P1D7	Structure-specific endonuclease subunit SLX4	Slx4
17.8406	16.5276	17.2463	15.9741	17.288	16.8579		2.2312	17.6828	0	0.0520642	-0.111087	Q6P4T2	Q6P4T2	U5 small nuclear ribonucleoprotein 200 kDa helicase	Snrnp200
17.9695	18.7961	17.2295	19.8403	20.6409	20.0871	+	229.36	21.6136	0	1.23911	1.98115	Q6P542	Q6P542	ATP-binding cassette sub-family F member 1	Abcf1
24.4151	23.6357	19.6364	16.1705	21.7486	21.5882	+	203.07	23.2362	0	1.56332	-2.35693	Q6P5D8;A0A3B2W494	Q6P5D8	Structural maintenance of chromosomes flexible hinge domain-containing protein 1	Smchd1
18.5249	16.1524	20.0509	20.0697	20.4851	20.5537		35.636	21.8504	0	0.937168	3.18073	Q6P5E4;G3UYG7;G3UZU8	Q6P5E4;G3UYG7	UDP-glucose:glycoprotein glucosyltransferase 1	Uggt1
18.1624	18.1627	17.738	16.9606	16.5741	19.0086		194.02	20.3969	0	0.102808	-0.371202	Q6P5F9	Q6P5F9	Exportin-1	Xpo1
21.0859	20.531	18.4321	17.1925	19.0868	18.9535	+	15.835	20.9697	0	1.61033	-1.7883	Q6P8I4;F8WI88;D3YWA4;Q3TM89	Q6P8I4;F8WI88;D3YWA4;Q3TM89	PEST proteolytic signal-containing nuclear protein	Pcnp
17.6574	20.0934	20.7074	21.0706	20.1948	20.407		73.731	22.5188	0	0.439058	1.42553	Q6PB66;F6V2A3	Q6PB66	Leucine-rich PPR motif-containing protein, mitochondrial	Lrpprc
17.4568	16.7782	20.2676	19.2799	17.6295	19.7622		43.612	21.3709	0	0.531898	1.57832	Q6PD26	Q6PD26	GPI transamidase component PIG-S	Pigs
23.0202	23.8332	21.9508	21.2573	21.7682	15.834		86.081	23.1993	0	0.580926	-4.62553	Q6PFB2;Q8VE37;A2CER2	Q6PFB2;Q8VE37	Regulator of chromosome condensation	Rcc1
18.2093	18.9651	16.8005	17.5514	17.5708	17.2315		2.9037	20.2919	0	0.985432	-1.18604	Q6PGH1	Q6PGH1	Protein BUD31 homolog	Bud31
17.9995	18.3547	16.9437	16.4281	17.5781	16.6598		4.7044	18.1077	0	0.783544	-1.05814	Q6PGH2	Q6PGH2	Hematological and neurological expressed 1-like protein	Hn1l
20.292	20.7416	16.7476	16.5493	16.7378	16.7629	+	18.927	19.194	0	2.44914	-3.76648	Q6PR54;A0A2I3BQ21;A0A2I3BRD9;A0A2I3BQI4	Q6PR54;A0A2I3BQ21;A0A2I3BRD9;A0A2I3BQI4	Telomere-associated protein RIF1	Rif1
16.5355	16.7766	15.8987	19.259	16.129	16.3579		13.818	19.8907	0	0.882087	-0.412595	Q6XLQ8	Q6XLQ8		Calu
22.7666	22.7405	21.3702	21.2034	21.9109	21.9385	+	129.33	23.8106	0	3.28062	-0.828872	Q6ZQ38	Q6ZQ38	Cullin-associated NEDD8-dissociated protein 1	Cand1
17.3304	17.6865	20.4813	20.3142	17.1052	20.5549		13.318	21.7615	0	0.279365	1.3216	Z4YJT3;Q6ZQ58	Z4YJT3;Q6ZQ58	La-related protein 1	Larp1
21.7617	22.8654	17.6616	16.07	17.6595	18.7345	+	23.118	21.3215	0	1.47783	-4.11654	Q6ZQF0;A0A087WS55;A0A087WPG9	Q6ZQF0	DNA topoisomerase 2-binding protein 1	Topbp1
20.3623	17.3119	21.6504	21.8637	21.5137	21.2887		75.585	23.5546	0	0.6278	2.56408	Q6ZQI3	Q6ZQI3	Malectin	Mlec
17.4206	17.2378	17.3605	19.1517	16.8717	17.3687		19.687	19.8677	0	0.29016	-0.20896	Q6ZQL4	Q6ZQL4	WD repeat-containing protein 43	Wdr43
22.0039	21.5389	24.7961	25.36	23.6329	24.031	+	29.562	26.9095	0	1.67039	2.06059	Q6ZWN5;F7CJS8;D3YWH9;Q9CXW7;D3YUV6;D3Z673	Q6ZWN5;F7CJS8;D3YWH9;Q9CXW7	40S ribosomal protein S9	Rps9
17.9444	17.9602	17.0741	17.4275	18.892	15.3893		3.2768	20.1824	0	0.162034	-0.811635	Q6ZWQ7	Q6ZWQ7		Spcs3
17.1009	17.4878	22.2574	21.9966	21.842	21.948	+	96.894	24.2815	0	2.72246	4.60068	Q6ZWV7;G3UWD7;F6YXU0;Q3U1U4	Q6ZWV7;G3UWD7	60S ribosomal protein L35	Rpl35;Gm10269
21.9738	21.7697	21.7733	21.5604	21.9247	22.0094		62.272	23.8141	0	0.319549	0.0952921	Q6ZWX6	Q6ZWX6	Eukaryotic translation initiation factor 2 subunit 1	Eif2s1
21.9277	22.3768	22.8746	22.6161	22.6379	23.0608		13.727	25.2953	0	0.817268	0.697086	Q6ZWY3;D6RH49;D3YYB0	Q6ZWY3;D6RH49;D3YYB0	40S ribosomal protein S27-like;40S ribosomal protein S27	Rps27l
18.1792	15.7604	21.2525	21.6478	22.0564	22.1283	+	14.973	24.147	0	1.28806	5.12258	Q6ZWZ4;P47964	Q6ZWZ4;P47964	60S ribosomal protein L36	Rpl36
18.6112	18.6722	22.8257	23.1605	22.7025	23.06	+	188.04	25.263	0	2.73883	4.23954	Q6ZWZ7;Q9CPR4;B2RY53	Q6ZWZ7;Q9CPR4	60S ribosomal protein L17	Rpl17
17.9702	18.1441	19.7121	19.7511	17.9296	15.1486		55.094	20.6417	0	0.409283	-1.518	Q76KJ5	Q76KJ5	DNA-directed RNA polymerase I subunit RPA34	Cd3eap
20.6801	20.95	20.5799	20.6335	20.7998	20.4068		8.4241	22.6355	0	0.32971	-0.211782	Q76MZ3;G3UXQ1;H3BJ83;G3UWL2;H3BIV7;H3BLQ0;Q3TTF6;H3BKU1;G3UWS4;Q7TNP2	Q76MZ3	Serine/threonine-protein phosphatase 2A 65 kDa regulatory subunit A alpha isoform	Ppp2r1a
23.6509	23.818	27.27	27.2056	27.3532	27.3535	+	323.31	28.892	0	3.2733	3.61894	Q78PY7;Q3TJ56;E9Q3E9	Q78PY7;Q3TJ56	Staphylococcal nuclease domain-containing protein 1	Snd1
18.7548	18.0043	17.0822	16.283	16.5278	15.791	+	2.4912	15.8635	0	1.28588	-2.22016	Q78WZ7	Q78WZ7	DNA-directed RNA polymerase I subunit RPA43	Twistnb
18.7222	18.5279	21.0814	21.1495	14.8854	20.9818		33.868	22.981	0	0.0748342	-0.691396	Q78XF5	Q78XF5	Oligosaccharyltransferase complex subunit OSTC	Ostc
18.1618	17.0139	17.2879	15.7292	19.3498	15.2761		5.7918	19.8945	0	0.0416626	-0.274904	Q791V5;A2AFW6;Q9D050;D6RCZ1	Q791V5;A2AFW6;Q9D050	Mitochondrial carrier homolog 2	Mtch2
18.3212	20.867	16.5866	17.3627	17.9439	16.5449		1.6467	19.4086	0.002451	0.607083	-2.34969	Q792Z1	Q792Z1		Try10
17.4929	17.2943	17.6233	15.3004	16.9277	16.8617		1.5879	15.2956	0.003218	1.38416	-0.498862	Q7TNE3	Q7TNE3	Sperm-associated antigen 7	Spag7
22.3615	22.3993	21.0199	21.1054	20.7494	21.2177	+	26.769	23.0225	0	1.56632	-1.39688	Q7TNV0;E9Q8Y1;D3YVJ6	Q7TNV0;E9Q8Y1;D3YVJ6	Protein DEK	Dek
22.0666	22.6393	23.5634	23.3242	23.5231	23.5414	+	313.44	25.2414	0	1.26556	1.17931	Q7TPR4;A1BN54;Q9JI91;O88990	Q7TPR4;A1BN54	Alpha-actinin-1	Actn1
22.5946	22.5478	24.7153	24.7137	24.7332	24.7637	+	323.31	26.394	0	3.78372	2.17727	Q7TPV4	Q7TPV4	Myb-binding protein 1A	Mybbp1a
19.3861	17.1638	17.5657	19.574	16.3522	14.3968		1.349	19.2328	0.0045767	0.723316	-2.90044	Q7TR05	Q7TR05	Olfactory receptor	Olfr1216
17.6984	18.4262	17.5729	20.4795	20.8007	16.2845		5.9591	21.6664	0	0.0689866	0.480284	Q80UM7	Q80UM7	Mannosyl-oligosaccharide glucosidase	Mogs
18.8897	18.5417	18.8416	19.1814	19.2359	19.5769		56.141	21.7102	0	0.978125	0.690657	Q80UU9	Q80UU9	Membrane-associated progesterone receptor component 2	Pgrmc2
18.0651	18.2041	16.7474	17.9773	18.066	18.144		21.861	20.3052	0	0.127564	-0.0296535	Q80UW8	Q80UW8	DNA-directed RNA polymerases I, II, and III subunit RPABC1	Polr2e
18.2388	16.8863	16.1493	17.5619	16.7735	17.5211		1.4016	16.8957	0.0038521	0.190585	-0.415239	Q80W22	Q80W22	Threonine synthase-like 2	Thnsl2
21.1878	19.8629	25.7332	25.7395	25.3359	25.3994	+	323.31	27.1805	0	1.7388	4.84232	Q80WJ7;F6QHD1;F6ZSG0;E9PUX0;F6ZQL0;F6QFT1	Q80WJ7;F6QHD1;F6ZSG0	Protein LYRIC	Mtdh
17.3046	18.228	17.1083	21.1458	16.1206	17.0907		1.2059	22.8906	0.0095168	0.647445	-1.16067	Q80WS3	Q80WS3	rRNA/tRNA 2-O-methyltransferase fibrillarin-like protein 1	Fbll1
19.406	17.8915	16.8789	17.0056	17.0929	19.9798		2.7464	20.6246	0	0.0216777	-0.112373	Q80X41;A0A1Y7VMH3	Q80X41;A0A1Y7VMH3	Serine/threonine-protein kinase VRK1	Vrk1
16.6478	17.7079	18.8636	13.7158	17.9635	16.2536		1.6793	14.2859	0.00081967	0.0216711	-0.0693274	Q80X85	Q80X85	28S ribosomal protein S7, mitochondrial	Mrps7
22.7672	22.8454	23.2134	23.2856	23.4059	23.3867	+	166.28	25.1251	0	2.33474	0.589992	Q80X90	Q80X90	Filamin-B	Flnb
18.4392	16.0814	17.9182	17.6216	16.7166	17.3263		1.3715	18.5961	0.0038285	0.064208	-0.238937	Q80Y44	Q80Y44	Probable ATP-dependent RNA helicase DDX10	Ddx10
18.7733	17.8926	18.912	17.9494	17.8783	15.9887		2.3793	19.7943	0	0.506528	-1.39949	Q80ZM5	Q80ZM5		H1fx
17.5058	18.0101	16.2117	15.1567	16.3232	17.0855		1.803	16.7926	0.00083682	0.830891	-1.05357	Q80ZS3	Q80ZS3	28S ribosomal protein S26, mitochondrial	Mrps26
18.3358	18.0417	14.9276	16.3575	15.3815	16.2578	+	3.3232	17.4013	0	1.4435	-2.36906	Q810A7	Q810A7	ATP-dependent RNA helicase DDX42	Ddx42
16.9861	19.9496	19.7598	19.7194	19.5519	19.2587		5.1326	21.4959	0	0.226719	0.937435	Q8BFR5;A0A0U1RPC4;A0A0U1RNQ6	Q8BFR5	Elongation factor Tu, mitochondrial	Tufm
18.4823	17.485	17.9322	16.4219	24.412	17.2193		2.4217	27.4675	0	0.286478	2.832	Q8BFZ3	Q8BFZ3	Beta-actin-like protein 2	Actbl2
17.651	18.0749	18.8621	18.765	16.4101	14.9985		2.4013	19.672	0	1.00237	-2.15861	Q8BFZ9;A0A1B0GT70	Q8BFZ9;A0A1B0GT70	Erlin-2	Erlin2
17.5773	17.6899	19.5269	19.5279	17.1766	16.0967		15.888	20.563	0	0.682574	-0.996966	Q8BG32;G3UYI4;G3UYL3;G3UXL5;G3UYH2	Q8BG32;G3UYI4;G3UYL3;G3UXL5;G3UYH2	26S proteasome non-ATPase regulatory subunit 11	Psmd11
16.4504	17.1535	16.9339	17.0658	16.3902	16.1832		9.1932	17.6359	0	0.53026	-0.515306	Q8BGB5	Q8BGB5	LIM domain-containing protein 2	Limd2
18.1596	16.9406	22.2305	21.9687	21.8061	21.5811	+	7.4626	23.4658	0	1.66453	4.14354	Q8BGD9;B2RWE8	Q8BGD9;B2RWE8	Eukaryotic translation initiation factor 4B	Eif4b
24.0523	23.5121	22.5087	22.6864	23.1937	22.9721		197.12	24.7268	0	0.857334	-0.699341	Q8BGJ5;Q922I7;Q8CB58;P17225;E9QMW9;E9Q0W3;F7DCW4;F7AXP1;E9Q279	Q8BGJ5;Q922I7;Q8CB58;P17225;E9QMW9	Polypyrimidine tract-binding protein 1	Ptbp1
19.7483	17.7397	21.9824	22.0208	21.9365	22.0962	+	84.462	23.5966	0	1.08022	3.27238	Q8BGQ7	Q8BGQ7	Alanine--tRNA ligase, cytoplasmic	Aars
17.0604	17.5169	16.3686	17.8382	17.5065	15.1646		1.5905	18.5398	0.0032206	0.294024	-0.953094	Q8BH24	Q8BH24	Transmembrane 9 superfamily member 4	Tm9sf4
17.487	15.9621	20.1125	19.988	19.898	20.1322	+	8.6791	21.9707	0	1.29408	3.29051	Q8BH80;Q9QY76	Q8BH80;Q9QY76	Vesicle-associated membrane protein-associated protein B	Vapb
17.3873	16.8063	16.141	17.7717	17.5942	17.4842		3.6627	18.3418	0	0.563445	0.44239	Q8BHD0	Q8BHD0	Ras-related protein Rab-39A	Rab39a
18.3555	16.9021	21.5742	21.6862	21.5102	21.9876	+	136.97	23.3247	0	1.48435	4.12007	Q8BHN3	Q8BHN3	Neutral alpha-glucosidase AB	Ganab
25.6797	25.6259	17.0962	15.8517	21.9417	22.1392	+	145.56	24.1928	0	3.09587	-3.6123	Q8BHX3;E9Q2C7	Q8BHX3	Borealin	Cdca8
18.53	17.4583	17.9514	18.0604	15.7434	16.2786	+	1.2693	18.2677	0.0067214	1.09491	-1.98316	Q8BHY2	Q8BHY2	Nucleolar complex protein 4 homolog	Noc4l
18.333	16.5626	16.7265	16.0813	17.3435	19.2502		1.5445	20.6081	0.0031797	0.235849	0.849062	Q8BJ71	Q8BJ71	Nuclear pore complex protein Nup93	Nup93
17.7024	17.7077	17.8678	16.8081	17.4632	19.7074		2.2992	21.3438	0	0.28826	0.880275	Q8BJS4	Q8BJS4	SUN domain-containing protein 2	Sun2
18.8229	17.4857	21.3105	21.4118	21.2402	21.1647	+	6.2323	22.8268	0	1.34647	3.04809	Q8BJW6;D3YZZ6	Q8BJW6	Eukaryotic translation initiation factor 2A;Eukaryotic translation initiation factor 2A, N-terminally processed	Eif2a
18.1932	18.319	19.2344	18.9845	17.5717	16.6153		31.826	20.2154	0	0.861701	-1.16257	Q8BJY1	Q8BJY1	26S proteasome non-ATPase regulatory subunit 5	Psmd5
24.0069	24.4841	23.3928	23.6391	23.9975	23.8974		49.334	25.4979	0	0.460936	-0.298064	Q8BK67;A2AWQ2	Q8BK67	Protein RCC2	Rcc2
17.7211	18.2843	20.6585	20.5877	20.9305	20.8998	+	62.396	22.2996	0	2.03393	2.91242	Q8BKC5	Q8BKC5	Importin-5	Ipo5
20.0651	19.3393	18.9081	18.3289	19.1061	19.4081		4.5927	20.9746	0	0.426047	-0.445134	Q8BL97	Q8BL97	Serine/arginine-rich splicing factor 7	Srsf7
18.3206	17.6893	21.105	21.0865	21.072	21.3176	+	28.597	22.7389	0	1.95519	3.18991	Q8BMJ2	Q8BMJ2	Leucine--tRNA ligase, cytoplasmic	Lars
21.5816	22.9002	27.0739	27.0406	26.6768	26.7427	+	323.31	28.5072	0	1.67507	4.46882	Q8BMK4	Q8BMK4	Cytoskeleton-associated protein 4	Ckap4
20.6095	20.3896	20.0532	19.8347	19.9947	20.0017		35.844	21.8487	0	1.34757	-0.501423	Q8BMS1	Q8BMS1	Trifunctional enzyme subunit alpha, mitochondrial;Long-chain enoyl-CoA hydratase;Long chain 3-hydroxyacyl-CoA dehydrogenase	Hadha
19.8343	17.8585	16.3401	15.6343	16.6751	15.8526		2.8609	18.5368	0	0.862582	-2.58248	Q8BP27	Q8BP27	Swi5-dependent recombination DNA repair protein 1 homolog	Sfr1
18.2941	16.9789	21.5538	21.5259	21.3886	21.1592	+	17.806	23.0558	0	1.49391	3.6374	Q8BP47	Q8BP47	Asparagine--tRNA ligase, cytoplasmic	Nars
18.7093	18.9894	23.7311	23.8771	23.5404	23.8419	+	29.298	26.0179	0	2.74444	4.84178	Q8BP67;F6RSK3	Q8BP67	60S ribosomal protein L24	Rpl24
18.1514	17.1971	16.4254	18.8756	17.6651	16.2718		100.79	18.5343	0	0.308788	-0.70586	Q8BP92	Q8BP92	Reticulocalbin-2	Rcn2
21.5649	21.435	17.1784	15.7057	16.9201	17.0395	+	62.671	20.7938	0	3.41931	-4.52014	Q8BPZ8	Q8BPZ8	BRCA1-A complex subunit Abraxas	Fam175a
17.449	17.5866	16.4059	16.4445	17.119	18.5314		1.5195	18.1439	0.0031746	0.150548	0.307441	Q8BQ38	Q8BQ38		Prkg1
17.3343	17.771	19.9173	20.1292	19.8579	19.9019	+	15.951	21.5792	0	2.05667	2.32722	Q8BU14	Q8BU14	Translocation protein SEC62	Sec62
19.4043	16.779	22.3495	22.2789	22.0895	21.6923	+	42.317	23.8024	0	0.98507	3.79924	Q8BU30;E9Q866	Q8BU30	Isoleucine--tRNA ligase, cytoplasmic	Iars
21.5401	21.642	17.5025	17.1571	20.2228	20.3928	+	55.339	21.4828	0	2.22857	-1.28327	Q8BUI3;H9KV12	Q8BUI3;H9KV12	Leucine-rich repeat and WD repeat-containing protein 1	LRWD1;Lrwd1
17.0427	20.1675	22.3775	22.8631	21.8653	22.6299		323.31	24.2954	0	0.81868	3.64244	Q8BVY0;A0A2R8VHW2	Q8BVY0	Ribosomal L1 domain-containing protein 1	Rsl1d1
17.1616	19.0105	17.5887	17.6567	20.4752	17.2148		2.4223	21.9803	0	0.139831	0.758912	Q8BWS5	Q8BWS5	G protein-regulated inducer of neurite outgrowth 3	Gprin3
17.9847	16.0814	15.7705	19.4751	16.767	16.7092		1.7762	20.0422	0.00083195	0.104584	-0.294995	Q8BWT1	Q8BWT1	3-ketoacyl-CoA thiolase, mitochondrial	Acaa2
18.2147	17.9839	21.4149	15.3018	21.4308	21.4919	+	17.008	22.854	0	2.90001	3.36205	Q8BWY3	Q8BWY3	Eukaryotic peptide chain release factor subunit 1	Etf1
18.57	18.3387	17.3424	17.0659	20.1908	16.6527		55.343	20.696	0	0.00568672	-0.0326176	Q8BYK6	Q8BYK6	YTH domain-containing family protein 3	Ythdf3
18.3421	16.9926	17.46	15.5736	16.935	19.4033		40.443	21.2603	0	0.121827	0.501822	Q8C2Q8;Q91VR2;A2AKV0;A2AKV1;A2AKV2;A2AKV3;A2AKU9	Q8C2Q8;Q91VR2;A2AKV0;A2AKV1;A2AKV2;A2AKV3;A2AKU9	ATP synthase subunit gamma;ATP synthase subunit gamma, mitochondrial	Atp5c1
18.8639	17.8741	17.5666	17.4861	16.9767	18.9042		1.4311	20.5306	0.0030984	0.136301	-0.428544	Q8C3X8	Q8C3X8	Lipase maturation factor 2	Lmf2
18.6602	16.4406	16.6318	16.8776	16.7336	16.4323		10.31	18.6505	0	0.319917	-0.967471	Q8C5R8;G3UXL2;Q9D7G0	Q8C5R8;G3UXL2;Q9D7G0	Ribose-phosphate pyrophosphokinase 1	Prps1l1;Prps1l3;Prps1
18.4498	18.0296	16.6858	16.6643	16.9942	15.8474		11.114	17.123	0	1.01476	-1.81887	Q8C6B9	Q8C6B9	Active regulator of SIRT1	Rps19bp1
18.1211	17.1468	20.6387	20.7793	20.794	21.2026	+	69.611	22.4689	0	1.62381	3.36437	Z4YJW0;Q8C7X2;A0A1Y7VP81	Z4YJW0;Q8C7X2;A0A1Y7VP81	ER membrane protein complex subunit 1	Emc1
22.3985	22.9599	21.2872	21.2267	21.7856	22.3588		26.682	23.2895	0	0.569574	-0.607018	Q8CCK0	Q8CCK0	Core histone macro-H2A.2	H2afy2
22.0445	22.0526	20.2714	20.6014	20.0467	20.1388	+	51.026	22.5053	0	3.25316	-1.95579	Q8CDN6	Q8CDN6	Thioredoxin-like protein 1	Txnl1
21.3458	21.4773	20.1211	15.8267	20.5859	20.8487		13.451	21.7285	0	1.37703	-0.694266	Q8CG48;B1AWH6	Q8CG48	Structural maintenance of chromosomes protein 2	Smc2
18.646	17.0685	23.9884	24.079	23.9901	23.9665	+	323.31	25.6147	0	1.79034	6.12105	Q8CGC7;A0A0A6YWH3;A0A0A6YWA4	Q8CGC7	Bifunctional glutamate/proline--tRNA ligase;Glutamate--tRNA ligase;Proline--tRNA ligase	Eprs
16.863	15.8718	18.1872	15.5798	16.4439	16.0486		2.8014	19.4615	0	0.0749034	-0.121065	Q8CGK3	Q8CGK3	Lon protease homolog, mitochondrial	Lonp1
17.9535	17.6869	21.2157	21.4801	21.0678	20.7239	+	7.6528	22.6575	0	2.30407	3.07567	Q8CI51;A0A0G2JEJ0;D9J2Z9;D9J300;D9J301;D9J302;A0A0G2JGZ5;Q9CRA2;D9J303;F8WJI6;E9Q8P5	Q8CI51;A0A0G2JEJ0;D9J2Z9;D9J300;D9J301;D9J302;A0A0G2JGZ5	PDZ and LIM domain protein 5	Pdlim5
17.3906	19.374	19.4605	19.332	16.6898	19.514		7.9993	20.8438	0	0.0526444	-0.280416	Q8CIN4;A0A0U1RQ87;A3KGC3;S4R2K7;A3KGC4;A3KGC5;G5E884;O88643;Q61036	Q8CIN4	Serine/threonine-protein kinase PAK 2;PAK-2p27;PAK-2p34	Pak2
18.4544	19.827	17.6583	17.1693	16.4698	16.8581	+	4.0769	20.0474	0	1.13159	-2.47676	Q8JZK9;P54869	Q8JZK9;P54869	Hydroxymethylglutaryl-CoA synthase, cytoplasmic;Hydroxymethylglutaryl-CoA synthase, mitochondrial	Hmgcs1;Hmgcs2
18.7069	16.5196	21.6399	21.4025	20.831	21.1197	+	89.116	22.802	0	1.03199	3.36209	Q8JZQ9	Q8JZQ9	Eukaryotic translation initiation factor 3 subunit B	Eif3b
17.5478	16.9727	16.9265	17.4074	17.0137	15.6516		1.232	18.2544	0.0088757	0.47326	-0.927605	Q8K003	Q8K003	Translation machinery-associated protein 7	Tma7
19.9851	19.5712	17.1219	16.7253	17.2753	17.0956	+	22.5	18.417	0	2.12578	-2.5927	Q8K1K4	Q8K1K4	Centromere protein I	Cenpi
17.3446	16.8667	22.8595	22.818	22.5794	22.6361	+	92.684	24.3872	0	2.71963	5.50205	Q8K1N4;A0A2R8W6M8;A0A2R8W6T4;A0A2R8VJN7;A0A2R8VJY7	Q8K1N4;A0A2R8W6M8	Spermatogenesis-associated serine-rich protein 2	Spats2
18.1352	17.895	18.9476	18.6973	17.7691	17.4633		7.1727	19.8502	0	0.752849	-0.398876	Q8K224;A2BH46	Q8K224	N-acetyltransferase 10	Nat10
18.8951	18.0802	16.776	15.4039	17.1369	18.5045		33.293	21.5014	0	0.309582	-0.666952	Q8K273	Q8K273	Membrane magnesium transporter 1	Mmgt1
20.8848	21.2937	16.9411	15.1865	16.7808	16.3125	+	16.827	19.5922	0	2.33264	-4.54258	Q8K298;A0A1L1SS34	Q8K298	Actin-binding protein anillin	Anln
20.2201	20.2905	20.2838	20.3833	20.4962	20.1043		6.2041	22.0802	0	0.074489	0.0449362	Q8K2B3;A0A1Y7VJ55	Q8K2B3	Succinate dehydrogenase [ubiquinone] flavoprotein subunit, mitochondrial	Sdha
17.6785	17.4371	16.9821	16.1999	17.9626	16.4367		1.3935	15.0219	0.0038462	0.162137	-0.358172	Q8K2T8	Q8K2T8	RNA polymerase II-associated factor 1 homolog	Paf1
17.4926	17.871	18.4204	16.5184	16.9542	15.9457		14.664	19.3261	0	0.825426	-1.23183	Q8K310;A0A087WSU2;A0A087WQD6;A0A087WQP4;A0A087WNP3;A0A087WPU5;A0A087WPQ5;A0A087WSP7;A0A087WQZ1	Q8K310;A0A087WSU2;A0A087WQD6	Matrin-3	Matr3
17.812	17.2013	19.2465	15.9739	16.105	16.1639	+	1.5012	20.7063	0.0031496	1.33245	-1.37216	Q8K363	Q8K363	ATP-dependent RNA helicase DDX18	Ddx18
18.345	18.3914	16.4587	16.6953	16.7131	16.5051	+	2.3636	19.0661	0	2.43746	-1.75908	Q8K411	Q8K411	Presequence protease, mitochondrial	Pitrm1
18.0831	17.7226	16.7002	17.7648	16.8802	15.9859		2.766	16.3983	0	1.03224	-1.46982	Q8K4Z5	Q8K4Z5	Splicing factor 3A subunit 1	Sf3a1
17.6351	17.2212	20.874	20.8488	20.5097	20.5934	+	124.24	22.2706	0	2.34301	3.12337	Q8QZY1	Q8QZY1	Eukaryotic translation initiation factor 3 subunit L	Eif3l
18.4159	17.8578	20.0059	20.1751	19.8356	19.7111	+	49.949	21.9204	0	1.53478	1.63646	Q8R010;Q8R3V2	Q8R010;Q8R3V2	Aminoacyl tRNA synthase complex-interacting multifunctional protein 2	Aimp2
19.2193	17.8298	20.0239	20.4812	19.6062	19.8514		4.5261	21.6605	0	0.638376	1.2043	Q8R050;Q149F3;F7CE88	Q8R050;Q149F3	Eukaryotic peptide chain release factor GTP-binding subunit ERF3A;Eukaryotic peptide chain release factor GTP-binding subunit ERF3B	Gspt1;Gspt2
21.6316	20.5793	18.8651	19.0217	20.0481	19.6758		3.0026	21.324	0	0.807695	-1.24348	Q8R0A0	Q8R0A0	General transcription factor IIF subunit 2	Gtf2f2
17.4267	20.4093	22.1129	22.6905	22.5902	22.1703		8.8194	24.0283	0	0.828973	3.46223	Q8R0X7;D6REF7;D3YZT4	Q8R0X7;D6REF7	Sphingosine-1-phosphate lyase 1	Sgpl1
18.9466	18.2707	18.958	15.8661	18.3131	15.5965		101.09	20.2991	0	0.445088	-1.65384	Q8R180	Q8R180	ERO1-like protein alpha	Ero1l
18.9039	17.6782	19.3975	20.9115	21.1673	21.2334	+	130.24	22.3085	0	1.37952	2.9093	Q8R1B4;M0QWV3	Q8R1B4	Eukaryotic translation initiation factor 3 subunit C	Eif3c
17.9197	16.9322	16.484	16.0596	17.4254	17.5504		13.758	20.4027	0	0.0398248	0.061904	Q8R1I1	Q8R1I1	Cytochrome b-c1 complex subunit 9	Uqcr10
18.3645	16.8105	17.0184	17.5852	17.1578	17.2701		34.824	18.6066	0	0.168191	-0.373542	Q8R2G6	Q8R2G6	Coiled-coil domain-containing protein 80	Ccdc80
18.9613	16.5008	21.4198	21.428	19.7974	20.0246		273.68	23.324	0	0.658157	2.17992	Q8R2K3;Q9CYR0;D3Z3Y3	Q8R2K3;Q9CYR0	Single-stranded DNA-binding protein;Single-stranded DNA-binding protein, mitochondrial	Ssbp1
17.6196	16.6271	17.2754	16.6832	16.5954	15.2849		1.206	17.9235	0.0095238	0.542596	-1.18319	Q8R2Y8	Q8R2Y8	Peptidyl-tRNA hydrolase 2, mitochondrial	Ptrh2
19.8151	19.9131	17.7605	16.809	17.6149	17.6488	+	9.8542	19.336	0	3.26784	-2.23225	Q8R323	Q8R323	Replication factor C subunit 3	Rfc3
18.041	17.5012	17.1395	17.2677	16.1853	18.4357		30.117	20.6001	0	0.137252	-0.460646	Q8R5L1	Q8R5L1		C1qbp
19.3689	17.7455	16.7896	15.1095	17.1719	17.112		1.7096	18.7259	0.00082508	0.650574	-1.41523	Q9CWY6;Q8VC52	Q9CWY6;Q8VC52	RNA-binding protein with multiple splicing 2	Rbpms2
17.8347	18.1227	17.9505	16.6456	16.9887	17.7579		4.8469	19.7853	0	0.555444	-0.605427	Q9CQ43;Q8VCG1	Q9CQ43;Q8VCG1		Dut
26.169	26.1	26.6932	26.6718	26.5999	26.6648		323.31	28.4111	0	2.04926	0.497871	Q8VDD5;A0A2R8VKI5;A0A2R8W6V7;F2Z494;Q8BXF2	Q8VDD5	Myosin-9	Myh9
20.8666	21.1007	19.3897	16.6279	19.8003	20.024	+	10.069	21.0826	0	1.65615	-1.07148	Q8VDF2;E9Q5Y5;Q7TMI3	Q8VDF2	E3 ubiquitin-protein ligase UHRF1	Uhrf1
25.3022	25.241	28.454	28.3471	28.448	28.4246	+	323.31	30.021	0	3.97022	3.16473	Q8VDJ3;A0A087WP83;A0A087WS92;A0A087WPC5;A0A087WQY9;A0A087WPH2	Q8VDJ3;A0A087WP83	Vigilin	Hdlbp
17.7183	22.1129	21.5949	21.6657	21.5523	21.8071		17.634	23.3498	0	0.295057	1.76413	Q8VDW0;Q9Z1N5;G3UXI6;D6RHT5	Q8VDW0;Q9Z1N5	ATP-dependent RNA helicase DDX39A;Spliceosome RNA helicase Ddx39b	Ddx39a;Ddx39b
23.2094	23.1931	22.7115	23.3395	23.3797	23.2322		200.58	24.9084	0	0.53235	0.104711	Q8VEK3	Q8VEK3	Heterogeneous nuclear ribonucleoprotein U	Hnrnpu
18.1667	17.8807	22.278	22.2254	22.3466	22.5063	+	79.204	23.8962	0	2.85977	4.40273	Q8VHE0	Q8VHE0	Translocation protein SEC63 homolog	Sec63
20.8707	20.629	21.3083	21.2212	21.5496	21.3668		217.14	23.1322	0	1.36813	0.708368	Q8VHX6	Q8VHX6	Filamin-C	Flnc
21.439	20.7946	20.8503	20.426	21.2271	21.5743		16.477	22.689	0	0.284679	0.28383	Q8VIJ6	Q8VIJ6	Splicing factor, proline- and glutamine-rich	Sfpq
19.9498	19.9676	22.5637	22.6106	21.2659	21.915	+	100.23	24.7163	0	1.42737	1.63174	Q91V55;D3YYM6;D3Z1S8;P97461	Q91V55;D3YYM6;D3Z1S8;P97461	40S ribosomal protein S5;40S ribosomal protein S5, N-terminally processed	Rps5
22.9794	22.5165	21.6317	21.2571	21.7354	21.9028		27.629	23.5717	0	1.19673	-0.928867	Q91VC3;A0A0N4SVP8;A2AFK7;E9PV04;A0A0N4SVM5	Q91VC3;A0A0N4SVP8;A2AFK7;E9PV04	Eukaryotic initiation factor 4A-III;Eukaryotic initiation factor 4A-III, N-terminally processed	Eif4a3;Gm8994
18.008	18.4348	18.6713	17.1662	15.738	15.1572	+	5.0966	18.8861	0	1.78346	-2.77382	Q91VE6;E0CXU3	Q91VE6;E0CXU3	MKI67 FHA domain-interacting nucleolar phosphoprotein	Nifk
22.283	22.4438	22.061	21.9821	22.2161	22.3999		151.1	23.853	0	0.158319	-0.055397	Q91VI7;A0A1B0GSG5;A0A1B0GRG4;A0A1B0GRY7	Q91VI7;A0A1B0GSG5;A0A1B0GRG4	Ribonuclease inhibitor	Rnh1
28.1367	28.2436	16.96	19.3554	26.9117	27.1014	+	323.31	28.0461	0	2.07817	-1.18361	Q91VL8	Q91VL8	Telomeric repeat-binding factor 2-interacting protein 1	Terf2ip
21.678	21.9643	21.1257	20.9632	21.6148	21.6126		41.67	23.4127	0	0.546124	-0.207426	Q91VR5;A0A1Y7VM48	Q91VR5	ATP-dependent RNA helicase DDX1	Ddx1
24.1693	24.3546	16.1258	16.1736	25.6901	25.7794	+	323.31	26.2132	0	2.31507	1.47282	Q91WC1;Q3UXR7	Q91WC1;Q3UXR7	Protection of telomeres protein 1	Pot1;Pot1a
17.7496	18.2185	16.7231	16.3252	17.7259	17.4741		3.8916	18.6613	0	0.543881	-0.384021	Q91WK2	Q91WK2	Eukaryotic translation initiation factor 3 subunit H	Eif3h
18.4206	17.9951	19.9196	20.034	19.728	19.8301	+	3.3357	21.4377	0	1.72476	1.57122	Q91WM3	Q91WM3	U3 small nucleolar RNA-interacting protein 2	Rrp9
21.8597	22.033	16.8872	16.1176	17.8429	19.6832	+	37.012	20.6278	0	1.12527	-3.18329	Q91WN1	Q91WN1	DnaJ homolog subfamily C member 9	Dnajc9
18.5348	17.646	19.3441	19.1768	19.5222	20.0238	+	10.79	21.0456	0	1.09176	1.68259	Q91XV3	Q91XV3	Brain acid soluble protein 1	Basp1
20.6439	21.3124	26.367	26.3301	25.7144	25.8331	+	205.52	27.6771	0	2.30325	4.7956	Q91YQ5;A0A0N4SUJ8	Q91YQ5	Dolichyl-diphosphooligosaccharide--protein glycosyltransferase subunit 1	Rpn1
17.5348	16.3099	18.2949	15.2187	17.187	18.535		1.834	18.2605	0.00084246	0.386137	0.938642	Q91YR1	Q91YR1	Twinfilin-1	Twf1
19.2573	17.468	17.4228	16.7665	16.0773	16.9042		9.1959	18.4668	0	0.703513	-1.8719	Q91YR7	Q91YR7	Pre-mRNA-processing factor 6	Prpf6
17.5208	16.8702	17.16	18.1065	18.4051	17.8712		1.4182	18.9235	0.0030912	0.811271	0.94262	Q91YT7;E9PW90	Q91YT7;E9PW90	YTH domain-containing family protein 2	Ythdf2
20.8576	18	20.8606	20.7918	20.2061	21.0448		6.8791	22.873	0	0.295903	1.19669	Q91Z25;Q9WV32;F6THG2;F6VVE6	Q91Z25;Q9WV32;F6THG2	Actin-related protein 2/3 complex subunit 1B	Arpc1b
22.7113	18.2681	16.6075	19.8685	18.1538	15.0099		7.4055	21.9641	0	0.541314	-3.90784	Q91Z50;P39749	Q91Z50;P39749	Flap endonuclease 1	Fen1
26.6722	26.8085	25.4353	25.3806	25.4043	25.4559	+	323.31	27.2609	0	2.51196	-1.31027	Q91ZA3;H3BL62;D3YWM4;H3BK61;D3YZC0;H3BKW6;H3BJR0	Q91ZA3	Propionyl-CoA carboxylase alpha chain, mitochondrial	Pcca
24.9251	24.887	21.8426	21.8325	22.9569	22.8677	+	131.93	24.5495	0	3.22825	-1.99378	Q91ZW3;Q6PGB8;F6Z6F4	Q91ZW3	SWI/SNF-related matrix-associated actin-dependent regulator of chromatin subfamily A member 5	Smarca5
22.2903	22.3725	22.0832	22.0169	22.3205	22.3541		50.73	24.1994	0	0.0425819	0.00588799	Q920E5;A0A0G2JEA5;A0A0G2JDJ5;A0A0G2JEB3;A0A0G2JE82	Q920E5;A0A0G2JEA5;A0A0G2JDJ5;A0A0G2JEB3	Farnesyl pyrophosphate synthase	Fdps
22.6868	20.7874	16.2046	18.8559	19.3633	20.1639		107.19	21.6601	0	0.708653	-1.97354	Q921K2;P11103	Q921K2;P11103	Poly [ADP-ribose] polymerase 1	Parp1
18.312	17.0372	17.1739	17.6629	16.9318	16.2402		2.8031	17.5818	0	0.565242	-1.08863	Q921M3	Q921M3	Splicing factor 3B subunit 3	Sf3b3
16.9714	16.8214	16.9939	16.3301	16.9127	16.3061		4.1666	16.249	0	0.341696	-0.286981	Q921N6	Q921N6	Probable ATP-dependent RNA helicase DDX27	Ddx27
20.1877	17.661	15.7652	17.9923	16.2609	18.2445		3.2569	20.6173	0	0.390131	-1.67169	Q921T2;E9PWW2;D3YXF8;D3YZP0;D3YZJ9;J3QQ40;Q3UE61	Q921T2;E9PWW2	Torsin-1A-interacting protein 1	Tor1aip1
17.1755	18.4679	17.833	18.0203	17.8692	15.7221		2.658	19.4878	0	0.301962	-1.02606	Q921Y2	Q921Y2	U3 small nucleolar ribonucleoprotein protein IMP3	Imp3
19.8969	20.2222	23.1355	22.1684	22.4282	21.5401	+	207.51	24.1223	0	1.25636	1.92457	Q922B2;Q8BJY7	Q922B2	Aspartate--tRNA ligase, cytoplasmic	Dars
18.2311	20.3555	22.0085	22.0731	21.7059	21.7424		53.902	23.5254	0	0.825754	2.43085	Q922F4	Q922F4	Tubulin beta-6 chain	Tubb6
17.3684	17.176	20.0117	20.0869	16.1497	15.9573	+	30.466	21.1626	0	1.9122	-1.21869	Q922J9;D3Z5W6;D3Z4N9	Q922J9;D3Z5W6;D3Z4N9	Fatty acyl-CoA reductase 1	Far1
24.9745	25.0551	26.555	26.3453	26.2173	26.3496	+	170.92	28.364	0	2.43126	1.26865	Q922Q8	Q922Q8	Leucine-rich repeat-containing protein 59	Lrrc59
17.9299	16.9785	23.3605	23.2966	22.5949	22.8726	+	290.8	24.6562	0	2.06068	5.27952	Q922R8;Q3TML0	Q922R8;Q3TML0	Protein disulfide-isomerase A6	Pdia6
20.3224	20.206	17.1886	16.4633	17.0958	16.7018	+	1.5584	19.0919	0.0031949	2.43126	-3.36537	Q924C1	Q924C1	Exportin-5	Xpo5
22.2438	22.0649	16.0985	16.4718	17.0961	15.4992	+	35.2	20.7048	0	1.73744	-5.85664	Q924W5;A0A1W2P6V7;A0A1W2P6F2;A0A1W2P6W0	Q924W5	Structural maintenance of chromosomes protein 6	Smc6
17.7422	17.3177	18.3853	16.6896	15.7944	15.5724	+	3.8483	18.1842	0	1.7848	-1.84656	Q99J36	Q99J36	THUMP domain-containing protein 1	Thumpd1
21.2014	20.8965	22.9443	22.0614	23.1371	21.2685		3.2641	24.2536	0	0.459507	1.15385	Q99JF8;F6RB63;A2BI12	Q99JF8;F6RB63;A2BI12	PC4 and SFRS1-interacting protein	Psip1
18.2883	17.8838	19.9232	20.0931	16.672	16.3293	+	12.22	20.9595	0	1.57131	-1.58538	Q99JY9;A0A087WRA1;A0A087WQ14;A0A087WPR6;A0A087WP86	Q99JY9;A0A087WRA1	Actin-related protein 3	Actr3
17.9901	17.6057	18.1384	20.4119	20.0787	17.0594		2.9587	22.5724	0	0.178681	0.771138	Q99JZ4;A0A1W2P720;A0A1W2P869;A0A1W2P6N3;Q9CQC9;P36536	Q99JZ4;A0A1W2P720;A0A1W2P869;A0A1W2P6N3;Q9CQC9;P36536	GTP-binding protein SAR1b;GTP-binding protein SAR1a	Sar1a;Sar1b
20.8936	20.7537	20.7312	20.3473	20.862	20.3478		6.8347	22.4102	0	0.302842	-0.218762	Q99K48	Q99K48	Non-POU domain-containing octamer-binding protein	Nono
20.5779	17.1299	20.9902	20.785	20.9941	21.0717		94.554	22.9941	0	0.476619	2.17897	Q99K85;Q3U6K9;E9Q6P1	Q99K85;Q3U6K9	Phosphoserine aminotransferase	Psat1
17.7315	17.9591	18.8144	15.947	16.0391	17.5713		1.5098	18.5858	0.0031596	0.506671	-1.04008	Q99KE1	Q99KE1	NAD-dependent malic enzyme, mitochondrial	Me2
21.7982	22.0605	21.4823	21.5886	21.5413	21.3049		28.589	23.4896	0	0.986587	-0.506261	Q99KI0;A0A2R8VJW0	Q99KI0	Aconitate hydratase, mitochondrial	Aco2
18.2242	18.8123	19.5287	17.0449	18.3936	19.7658		90.707	21.3881	0	0.275349	0.561406	Q99KI3	Q99KI3	ER membrane protein complex subunit 3	Emc3
17.2998	16.9086	16.938	18.0237	16.8771	15.1587		1.4809	17.6825	0.0031201	0.464793	-1.08627	Q99KQ4	Q99KQ4	Nicotinamide phosphoribosyltransferase	Nampt
17.5064	18.5227	18.544	18.1328	18.578	16.966		6.4853	20.028	0	0.0846982	-0.242585	Q99L04	Q99L04	Dehydrogenase/reductase SDR family member 1	Dhrs1
17.5533	19.6572	20.4161	20.2037	20.1322	20.3479		14.821	21.951	0	0.581447	1.63477	Q99L45;E0CXJ3	Q99L45	Eukaryotic translation initiation factor 2 subunit 2	Eif2s2
20.4713	20.8164	20.0834	20.2439	19.8604	20.2135		108.28	21.8943	0	0.875572	-0.606906	Q99LB4;P24452;D3YTL5	Q99LB4;P24452	Macrophage-capping protein	Capg
19.705	20.0526	19.3915	16.9838	17.3776	15.4371	+	22.39	19.5086	0	1.14254	-3.47146	Q99LC5	Q99LC5	Electron transfer flavoprotein subunit alpha, mitochondrial	Etfa
18.5251	19.4557	16.9192	16.9914	17.6431	18.5961		1.6198	20.0261	0.0024331	0.493287	-0.870785	Q99LF4	Q99LF4	tRNA-splicing ligase RtcB homolog	Rtcb
19.0928	18.4773	16.2789	16.1173	16.3579	17.3965	+	1.3038	18.5198	0.0052751	1.05945	-1.90781	Q99LP6	Q99LP6	GrpE protein homolog 1, mitochondrial	Grpel1
18.4692	17.4321	17.8589	15.4839	16.0857	16.5545		5.3422	18.0546	0	0.985973	-1.63054	Q99M08	Q99M08	Uncharacterized protein C4orf3 homolog
20.8135	20.7146	23.0756	23.1138	22.4407	22.7301	+	154.94	24.4896	0	2.15643	1.82139	Q99MN1;Q8R2P8	Q99MN1;Q8R2P8	Lysine--tRNA ligase	Kars
24.5054	24.7185	22.5974	22.456	22.383	22.4936	+	292.57	24.5246	0	2.51755	-2.17367	Q99MN9;E9Q1J7;D3YZC1;A0A087WQV1	Q99MN9;E9Q1J7;D3YZC1	Propionyl-CoA carboxylase beta chain, mitochondrial	Pccb
20.7201	20.539	19.2403	16.4995	19.5283	19.3277	+	23.75	20.8259	0	1.90619	-1.20158	Q99MR6;A0A0G2JG65;A0A0G2JDF8;A0A0G2JDF1;A0A0G2JDN3	Q99MR6;A0A0G2JG65;A0A0G2JDF8	Serrate RNA effector molecule homolog	Srrt
23.7351	23.4944	23.2909	22.8656	22.9523	22.861		110.36	25.3111	0	1.50162	-0.708082	Q99PT1	Q99PT1	Rho GDP-dissociation inhibitor 1	Arhgdia
18.4573	17.9045	19.8985	20.2104	19.6398	19.8743	+	23.947	21.4601	0	1.4631	1.57615	Q9CPN8	Q9CPN8	Insulin-like growth factor 2 mRNA-binding protein 3	Igf2bp3
18.0247	18.5383	16.1697	19.4278	18.9482	19.1031		212.17	21.8868	0	0.962254	0.744178	Q9CPP0	Q9CPP0	Nucleoplasmin-3	Npm3
18.5964	17.1135	17.099	16.2566	16.6462	17.7631		1.6823	20.2107	0.00082034	0.25485	-0.650309	Q9CPQ8	Q9CPQ8	ATP synthase subunit g, mitochondrial	Atp5l
19.7548	17.561	17.0994	18.3582	16.9307	17.2707		7.1526	19.468	0	0.529092	-1.55722	Q9CPS7	Q9CPS7	RNA-binding protein PNO1	Pno1
16.7614	18.9712	15.8206	16.9733	17.1179	15.6964		1.3686	19.1346	0.0038256	0.417557	-1.45916	Q9CPT4	Q9CPT4	Myeloid-derived growth factor	Mydgf
18.2858	17.3419	16.6827	17.3571	17.5585	15.4435		1.3293	19.7862	0.0053111	0.426504	-1.31286	Q9CPU0	Q9CPU0	Lactoylglutathione lyase	Glo1
17.6122	18.2578	16.061	14.1903	17.8057	17.0719		2.8844	17.6458	0	0.380135	-0.496212	Q9CPV5	Q9CPV5	Polyamine-modulated factor 1	Pmf1
17.9357	17.2182	19.5878	19.7421	18.9571	17.3159		7.3883	20.9464	0	0.224826	0.559546	Q9CPY7;A0A0G2JEM7	Q9CPY7;A0A0G2JEM7	Cytosol aminopeptidase	Lap3
21.0109	20.3087	20.2051	20.3307	20.5419	19.6453		45.215	22.3159	0	0.371819	-0.566261	Q9CQ65	Q9CQ65	S-methyl-5-thioadenosine phosphorylase	Mtap
17.5886	17.6944	18.3739	16.3241	15.4858	16.617		1.832	16.8942	0.00084175	0.968808	-1.59008	Q9CQ75	Q9CQ75	NADH dehydrogenase [ubiquinone] 1 alpha subcomplex subunit 2	Ndufa2
17.5238	17.5259	16.8843	17.3719	19.0947	15.2632		3.3931	19.5246	0	0.0588117	-0.345914	Q9CQ82	Q9CQ82	Centromere protein R	Itgb3bp
18.1131	17.2514	17.1433	17.2313	17.1945	17.1151		30.225	19.613	0	0.459596	-0.527442	Q9CQ92;G3X9U9;D3YZ32	Q9CQ92;G3X9U9	Mitochondrial fission 1 protein	Fis1
19.7572	17.9641	17.3759	16.3148	15.8973	17.0959		2.6105	18.9677	0	0.796728	-2.36409	Q9CQB4;Q9D855	Q9CQB4;Q9D855	Cytochrome b-c1 complex subunit 7	Uqcrb
18.3172	18.0853	16.3742	15.7162	16.7948	17.5176		9.7889	19.7471	0	0.956773	-1.04507	Q9CQD1	Q9CQD1	Ras-related protein Rab-5A	Rab5a
17.0267	13.3967	16.6574	15.4752	16.014	15.0405		1.2311	13.3334	0.0088626	0.0544916	0.315565	Q9CQE5	Q9CQE5	Regulator of G-protein signaling 10	Rgs10
17.5197	17.0234	16.9369	16.4867	18.1145	16.0788		62.921	19.1238	0	0.0541532	-0.174904	Q9CQE8	Q9CQE8	UPF0568 protein C14orf166 homolog
19.2632	20.5563	17.1207	17.3923	15.5278	16.4051	+	17.811	20.5839	0	1.4308	-3.94332	Q9CQF3;A0A1D5RLS2;A0A1D5RM23	Q9CQF3;A0A1D5RLS2;A0A1D5RM23	Cleavage and polyadenylation specificity factor subunit 5	Nudt21
17.8342	17.0085	17.7964	16.7756	15.668	15.8472	+	34.429	17.3456	0	1.23036	-1.66374	Q9CQF7;Q9CWM4	Q9CQF7;Q9CWM4	Prefoldin subunit 1	Pfdn1
17.5892	17.8488	18.9276	20.2512	20.1047	16.5863		1.6086	21.675	0.0032389	0.121229	0.626482	Q9CQF9;A0A0N4SWD3;F7CIP8;D3Z275	Q9CQF9;A0A0N4SWD3;F7CIP8;D3Z275	Prenylcysteine oxidase	Pcyox1
20.8361	21.4724	23.1432	23.817	23.3615	23.373	+	54.263	25.8181	0	1.69768	2.213	Q9CQM8;O09167	Q9CQM8;O09167	60S ribosomal protein L21	Rpl21
18.4569	16.4251	19.6265	19.1555	17.1563	17.682		24.331	20.2308	0	0.00643377	-0.0218248	Q9CQN1	Q9CQN1	Heat shock protein 75 kDa, mitochondrial	Trap1
17.2121	16.6418	19.1083	19.0312	19.2232	18.8552	+	6.1014	21.346	0	1.60458	2.11224	Q9CQQ7;A0A0G2JGX3	Q9CQQ7;A0A0G2JGX3	ATP synthase F(0) complex subunit B1, mitochondrial	Atp5f1
21.3906	21.6001	21.1581	21.7786	21.8707	21.8321		20.404	24.1558	0	1.10237	0.356045	Q9CQR2	Q9CQR2	40S ribosomal protein S21	Rps21
17.5251	17.7628	15.5175	16.0952	17.7187	18.5365		1.813	20.4993	0.00083963	0.427323	0.483662	Q9CQS2	Q9CQS2	H/ACA ribonucleoprotein complex subunit 3	Nop10
20.8154	21.3409	22.5408	22.8325	22.4534	22.5126	+	5.0318	24.9692	0	1.47311	1.40484	Q9CQS8;E9PW43	Q9CQS8;E9PW43	Protein transport protein Sec61 subunit beta	Sec61b;Gm10320
21.9545	21.4652	20.7646	20.8765	20.5858	20.8438		126.57	23.0483	0	1.15921	-0.995096	Q9CQV8;A2A5N1	Q9CQV8;A2A5N1	14-3-3 protein beta/alpha;14-3-3 protein beta/alpha, N-terminally processed	Ywhab
18.0969	16.8467	15.9217	16.6239	18.3241	15.7368		1.4848	18.2299	0.0031299	0.10362	-0.441351	Q9CQW0	Q9CQW0	ER membrane protein complex subunit 6	Emc6
17.5857	17.443	16.8034	17.0742	16.5267	15.9351	+	4.0903	19.2843	0	1.28507	-1.28348	Q9CQW9	Q9CQW9	Interferon-induced transmembrane protein 3	Ifitm3
17.6191	17.8236	19.4946	17.3037	16.2853	16.5739	+	6.123	20.3873	0	1.73921	-1.29172	Q9CR16	Q9CR16	Peptidyl-prolyl cis-trans isomerase D	Ppid
21.1613	21.113	24.9444	24.7564	24.5786	24.5778	+	43.369	26.8322	0	4.30652	3.44106	Q9CR57;A0A1L1SUF6	Q9CR57	60S ribosomal protein L14	Rpl14
18.0481	17.5069	18.8131	18.7592	18.7762	18.2126		52.835	21.0739	0	0.682083	0.71687	Q9CRB2	Q9CRB2	H/ACA ribonucleoprotein complex subunit 2	Nhp2
21.8673	17.2322	21.8029	21.93	16.33	16.7028		59.018	23.1746	0	0.492232	-3.03335	Q9CRD2	Q9CRD2	ER membrane protein complex subunit 2	Emc2
19.2343	17.7555	16.8081	15.686	17.6357	17.1727		1.5797	17.023	0.0032077	0.530888	-1.09072	Q9CRY7	Q9CRY7	Glycerophosphodiester phosphodiesterase domain-containing protein 1	Gdpd1
22.9983	22.0009	19.735	19.7453	21.0324	20.3498		37.836	22.3275	0	1.01829	-1.80847	Q9CSH3;A0A2I3BR78	Q9CSH3	Exosome complex exonuclease RRP44	Dis3
24.7291	24.7961	18.9523	19.178	21.4052	21.7149	+	169.66	23.8358	0	2.61276	-3.20248	Q9CU62	Q9CU62	Structural maintenance of chromosomes protein 1A	Smc1a
19.8697	16.7738	19.7842	15.7764	19.7888	19.6991		2.5762	21.5344	0	0.341654	1.42224	Q9CVB6;D3YXG6	Q9CVB6;D3YXG6	Actin-related protein 2/3 complex subunit 2	Arpc2
24.9848	24.9972	19.0163	19.7529	21.7255	21.7971	+	229.41	24.0389	0	3.8985	-3.22968	Q9CW03	Q9CW03	Structural maintenance of chromosomes protein 3	Smc3
18.4173	16.9933	20.0621	16.5737	15.5197	20.065		2.6557	21.1557	0	0.0113724	0.0870795	Q9CWF2;Q7TMM9	Q9CWF2;Q7TMM9	Tubulin beta-2B chain;Tubulin beta-2A chain	Tubb2b;Tubb2a
21.4403	17.0431	21.7117	21.8286	21.5531	21.6709		148.44	23.3553	0	0.404642	2.37036	Q9CWJ9	Q9CWJ9	Bifunctional purine biosynthesis protein PURH;Phosphoribosylaminoimidazolecarboxamide formyltransferase;IMP cyclohydrolase	Atic
19.6892	19.4365	19.1218	18.9232	19.061	14.9616		3.1092	20.9474	0	0.468547	-2.55154	Q9CWS0;D3YU15	Q9CWS0	N(G),N(G)-dimethylarginine dimethylaminohydrolase 1	Ddah1
19.1889	18.0157	16.0364	15.7557	18.8806	18.3635		3.1159	20.6559	0	0.00956515	0.0197535	Q9CWW6	Q9CWW6	Peptidyl-prolyl cis-trans isomerase NIMA-interacting 4	Pin4
19.0845	18.0031	15.5587	16.9169	18.9118	16.5354		37.678	19.8349	0	0.226216	-0.820206	Q9CWZ3;A0A0G2JEA9;A0A0G2JFX7;A0A0N4SUH6	Q9CWZ3;A0A0G2JEA9;A0A0G2JFX7;A0A0N4SUH6	RNA-binding protein 8A	Rbm8a
17.6946	17.5436	15.6965	17.0082	18.2524	16.5172		4.229	19.5474	0	0.0898484	-0.234296	Q9CX30	Q9CX30	Protein YIF1B	Yif1b
18.1787	18.1508	17.1585	15.0828	14.9194	18.6605		1.7837	19.7637	0.00083403	0.268522	-1.37482	Q9CX34	Q9CX34	Suppressor of G2 allele of SKP1 homolog	Sugt1
20.7398	20.3957	18.643	18.9616	19.2075	18.6161	+	3.1825	21.081	0	1.39648	-1.65594	Q9CX86	Q9CX86	Heterogeneous nuclear ribonucleoprotein A0	Hnrnpa0
18.0871	19.381	17.7109	19.1547	17.3771	17.0688		2.5312	19.7958	0	0.820932	-1.51109	Q9CXF4	Q9CXF4	TBC1 domain family member 15	Tbc1d15
17.6987	19.3607	18.3056	16.7474	16.093	16.0518	+	3.5154	20.0756	0	1.00916	-2.45731	Q9CXW3;A0A0A6YY29	Q9CXW3;A0A0A6YY29	Calcyclin-binding protein	Cacybp
16.8181	16.2021	19.8293	20.2407	20.0438	16.2071		19.348	21.3676	0	0.306972	1.61534	Q9CXY6	Q9CXY6	Interleukin enhancer-binding factor 2	Ilf2
19.2226	17.8209	16.54	17.7092	18.1903	17.8862		6.7367	20.125	0	0.244384	-0.4835	Q9CY64;A2ASB8;A2ASB7;A2ASB1	Q9CY64	Biliverdin reductase A	Blvra
19.0317	17.1056	16.3029	16.8719	17.268	17.8646		6.7165	19.1567	0	0.175433	-0.502365	Q9CYG7	Q9CYG7	Mitochondrial import receptor subunit TOM34	Tomm34
19.2156	17.4491	16.3468	16.9848	18.0097	19.3904		2.7196	21.0788	0	0.111206	0.367656	Q9CZ13;A0A0A6YWX6	Q9CZ13;A0A0A6YWX6	Cytochrome b-c1 complex subunit 1, mitochondrial	Uqcrc1
18.5512	17.0805	17.6295	16.0521	18.6328	16.3708		5.5298	18.6345	0	0.0769739	-0.314037	Q9CZ15	Q9CZ15	DNA replication complex GINS protein PSF1	Gins1
17.5445	17.0117	21.6923	21.6062	21.3353	21.3163	+	41.085	23.0602	0	2.36563	4.04769	Q9CZ30;B1AYJ9	Q9CZ30	Obg-like ATPase 1	Ola1
19.1586	17.6375	15.5508	17.0819	16.502	18.8262		9.6419	19.5649	0	0.187117	-0.733984	Q9CZ44	Q9CZ44	NSFL1 cofactor p47	Nsfl1c
21.9592	21.6936	14.961	16.307	16.6697	15.9944	+	4.8475	19.8744	0	2.3632	-5.49431	Q9CZ92	Q9CZ92	Centromere protein P	Cenpp
17.8034	19.3836	19.4736	19.5344	19.6915	19.4733		74.336	21.0795	0	0.467538	0.988888	Q9CZD3	Q9CZD3	Glycine--tRNA ligase	Gars
20.7684	21.0094	23.6041	23.649	24.0466	24.0809	+	58.262	26.0159	0	2.8338	3.17489	Q9CZM2;B8JKK2	Q9CZM2	60S ribosomal protein L15	Rpl15
22.8464	23.0627	23.5322	23.4793	23.0008	22.934		281.22	25.0861	0	0.0362387	0.0128536	Q9CZN7	Q9CZN7	Serine hydroxymethyltransferase	Shmt2
18.3155	17.8543	17.3754	16.5139	17.0573	17.6234		1.4999	18.9424	0.0031471	0.748915	-0.744526	Q9CZU3	Q9CZU3	Superkiller viralicidic activity 2-like 2	Skiv2l2
23.1439	22.6203	23.2113	23.3287	22.7502	22.6453		29.233	24.765	0	0.250854	-0.184359	Q9CZU6;Q80X68	Q9CZU6;Q80X68	Citrate synthase, mitochondrial;Citrate synthase	Cs;Csl
20.0514	20.0364	22.2737	22.2819	21.9883	22.3497	+	17.601	24.6631	0	2.14478	2.12511	Q9CZX8;D3YUT3;D3Z722;D3YUG3;D3Z5R8;S4R223	Q9CZX8;D3YUT3;D3Z722;D3YUG3;D3Z5R8	40S ribosomal protein S19	Rps19
17.386	16.4837	16.1139	19.7648	16.8004	15.0734		4.8698	21.7365	0	0.383646	-0.997952	Q9CZX9	Q9CZX9	ER membrane protein complex subunit 4	Emc4
20.305	20.3728	18.4511	18.4448	18.5762	19.0003	+	5.9295	21.5016	0	1.72946	-1.55067	Q9CZY3;B7ZBY7;E9PY39;B7ZBY6;Q9D2M8	Q9CZY3;B7ZBY7;E9PY39	Ubiquitin-conjugating enzyme E2 variant 1	Ube2v1;Gm20431
16.4921	17.0073	22.3472	22.4236	21.9941	21.9498	+	12.422	23.7655	0	2.61211	5.22222	Q9D024;B1AR93;F7C265	Q9D024	Coiled-coil domain-containing protein 47	Ccdc47
18.2929	18.8589	17.2682	16.1476	19.0137	16.6593		4.0809	20.3323	0	0.219291	-0.739427	Q9D051	Q9D051	Pyruvate dehydrogenase E1 component subunit beta, mitochondrial	Pdhb
18.1321	19.4746	17.9968	16.3224	16.0484	16.3486	+	16.715	20.1554	0	1.19935	-2.60483	Q9D084;A6PWQ1;A0A140T8U2;H3BKU9;A6PWQ2	Q9D084;A6PWQ1;A0A140T8U2	Centromere protein S	Apitd1
18.114	17.3413	18.609	15.2136	18.3796	16.3574		1.4227	17.2536	0.003096	0.112623	-0.359161	Q9D0B6	Q9D0B6	Protein PBDC1	Pbdc1
18.2514	17.0812	21.6343	21.5935	20.5387	20.9915	+	5.1524	22.8467	0	1.41307	3.09879	Q9D0F3	Q9D0F3	Protein ERGIC-53	Lman1
21.9196	20.5	16.5157	16.3658	15.663	19.3786		4.7371	20.3607	0	0.688744	-3.68903	Q9D0F6;D3Z1Y6	Q9D0F6	Replication factor C subunit 5	Rfc5
19.6306	20.3828	23.1199	22.9588	22.0829	22.2954	+	225.3	24.4412	0	1.51425	2.18244	Q9D0I9	Q9D0I9	Arginine--tRNA ligase, cytoplasmic	Rars
22.4616	22.5406	16.6805	15.8116	17.7287	16.5805	+	6.1936	22.3279	0	1.94359	-5.34653	Q9D0N7;D3YTP6;D3Z616	Q9D0N7	Chromatin assembly factor 1 subunit B	Chaf1b
19.1298	18.0026	20.4244	20.4745	20.6176	20.62	+	52.089	22.0512	0	1.16866	2.05256	Q9D0R2	Q9D0R2	Threonine--tRNA ligase, cytoplasmic	Tars
17.961	16.6807	19.8485	19.9582	19.7283	19.5873	+	13.248	22.1235	0	1.16579	2.33698	Q9D0R8;A0A0A0MQC9	Q9D0R8;A0A0A0MQC9	Protein LSM12 homolog	Lsm12
17.6551	17.013	21.9495	21.8215	21.7328	21.7938	+	57.253	24.1596	0	2.27915	4.42926	Q9D0T1	Q9D0T1	NHP2-like protein 1;NHP2-like protein 1, N-terminally processed	Nhp2l1
18.0828	17.6203	17.0612	18.3694	16.306	15.8197	+	1.593	18.0282	0.0032258	1.47574	-1.78868	Q9D1A2	Q9D1A2	Cytosolic non-specific dipeptidase	Cndp2
16.5002	17.0774	19.7837	19.6544	19.3581	19.0738	+	3.6203	21.8447	0	1.76658	2.42716	Q9D1D4;A0A1Y7VM54	Q9D1D4;A0A1Y7VM54	Transmembrane emp24 domain-containing protein 10	Tmed10
17.2659	17.1129	16.8088	16.0674	17.926	18.4277		1.5061	20.3413	0.0031571	1.19479	0.987455	Q9D1G1	Q9D1G1	Ras-related protein Rab-1B	Rab1b
22.8029	22.0211	21.0827	20.6724	21.274	21.535		104.75	23.2623	0	0.871576	-1.00751	Q9D1J3;A0A1W2P7G2;A0A1W2P6N2	Q9D1J3;A0A1W2P7G2;A0A1W2P6N2	SAP domain-containing ribonucleoprotein	Sarnp
16.9867	17.5685	16.0702	15.8384	16.5599	16.9444		40.417	18.9294	0	0.567262	-0.52541	Q9D1M0	Q9D1M0	Protein SEC13 homolog	Sec13
18.5201	18.8283	18.3602	16.4043	16.3044	14.7573	+	1.5539	16.5783	0.0031847	1.23973	-3.14332	Q9D1M4	Q9D1M4	Eukaryotic translation elongation factor 1 epsilon-1	Eef1e1
18.069	17.9606	15.6915	16.6764	17.2394	17.1576	+	15.7	19.2339	0	2.16428	-0.816323	Q9D1M7	Q9D1M7	Peptidyl-prolyl cis-trans isomerase FKBP11	Fkbp11
18.594	18.6692	17.7208	17.1901	16.8544	16.9213	+	1.2888	18.1147	0.0060105	3.08042	-1.74372	Q9D1N9	Q9D1N9	39S ribosomal protein L21, mitochondrial	Mrpl21
16.8502	17.1931	16.3232	16.5325	16.7783	17.9388		8.1616	20.0463	0	0.198175	0.33692	Q9D1Q4	Q9D1Q4	Dolichol-phosphate mannosyltransferase subunit 3	Dpm3
21.2192	20.0077	22.4548	22.6227	22.4452	22.7536	+	8.9084	24.9511	0	1.06346	1.98599	Q9D1R9;A0A0G2JGY8;A0A0G2JEY6	Q9D1R9	60S ribosomal protein L34	Rpl34
17.1447	17.7072	19.1555	19.0878	17.5206	16.8819		1.7804	19.8395	0.00083264	0.186948	-0.224708	Q9D2R0	Q9D2R0	Acetoacetyl-CoA synthetase	Aacs
15.7527	17.6099	17.9146	20.0511	17.0351	16.8897		12.957	21.4552	0	0.101671	0.281128	Q9D358;A0A1W2P7X3;Q561M1	Q9D358;A0A1W2P7X3;Q561M1	Low molecular weight phosphotyrosine protein phosphatase	Acp1
18.1517	17.1974	16.3216	15.6017	15.2601	15.9941	+	1.2345	16.1718	0.0088823	1.1156	-2.04749	Q9D3D9	Q9D3D9	ATP synthase subunit delta, mitochondrial	Atp5d
18.803	18.5129	17.2401	16.162	17.7096	15.3452		11.155	17.2552	0	0.666471	-2.13052	Q9D4G9	Q9D4G9	RecQ-mediated genome instability protein 1	Rmi1
20.2949	20.024	16.8619	17.3913	17.566	16.3857	+	2.9966	18.1302	0	1.46446	-3.18364	Q9D6T0;A0A1B0GT07;A0A1B0GS52;A0A1B0GS48;A0A1B0GSR8	Q9D6T0;A0A1B0GT07	Nitric oxide synthase-interacting protein	Nosip
18.9288	20.2765	25.2188	25.3519	24.8387	24.7767	+	323.31	26.6384	0	1.78558	5.20499	Q9D6Z1;A2APD7;F7CHQ7;E0CXZ0;F6U250;F6V095;F6USW7;F7CHP9	Q9D6Z1	Nucleolar protein 56	Nop56
17.7763	16.2623	16.7872	16.3424	18.1039	17.2956		1.4364	18.9783	0.0031032	0.291669	0.680516	Q9D7B7	Q9D7B7	Probable glutathione peroxidase 8	Gpx8
18.7302	18.613	17.5163	15.4591	19.1018	16.1369		24.568	20.0346	0	0.258299	-1.05229	Q9D7K2	Q9D7K2	CST complex subunit TEN1	Ten1
18.6342	18.4653	20.5296	19.7606	19.6305	19.7227	+	2.5311	22.4597	0	2.14185	1.1269	Q9D7S7	Q9D7S7	60S ribosomal protein L22-like 1	Rpl22l1
18.8222	18.8084	17.0395	16.7658	16.5482	18.2899		3.2201	18.7391	0	0.601942	-1.39624	Q9D809	Q9D809		2200002D01Rik
20.0085	18.1028	19.2233	19.2035	16.7022	18.9494		1.8561	20.8325	0.00084459	0.308326	-1.22983	Q9D819	Q9D819	Inorganic pyrophosphatase	Ppa1
18.3477	18.3305	15.2957	16.0916	17.9994	17.2643		2.3031	17.8628	0	0.711453	-0.707225	Q9D883	Q9D883	Splicing factor U2AF 35 kDa subunit	U2af1
21.5839	21.338	20.0625	19.9281	20.1646	20.2493	+	21.193	22.0679	0	1.97533	-1.25398	Q9D8B3	Q9D8B3	Charged multivesicular body protein 4b	Chmp4b
17.4753	17.0337	26.3778	26.3493	25.8833	25.9561	+	184.05	27.7341	0	3.17619	8.66517	Q9D8E6	Q9D8E6	60S ribosomal protein L4	Rpl4
25.2595	24.8997	28.165	28.1163	27.7556	27.7551	+	154.3	29.6241	0	2.34764	2.67573	Q9D8N0	Q9D8N0	Elongation factor 1-gamma	Eef1g
18.7838	18.7479	17.702	16.2654	17.1235	14.0199		1.2137	18.2035	0.0095518	0.75495	-3.1941	Q9D8X2	Q9D8X2	Coiled-coil domain-containing protein 124	Ccdc124
18.7398	17.3086	17.5609	17.756	16.4171	22.1632		1.2258	24.4697	0.0088561	0.148367	1.2659	Q9D952	Q9D952	Envoplakin	Evpl
18.5325	17.8525	18.0894	19.3603	17.7958	17.2795		50.513	20.5928	0	0.577107	-0.654852	Q9DAU1	Q9DAU1	Protein canopy homolog 3	Cnpy3
18.9883	16.8654	16.5611	18.8395	19.3173	19.1586		8.886	20.729	0	0.464447	1.31114	Q9DB05	Q9DB05	Alpha-soluble NSF attachment protein	Napa
17.9301	15.916	19.5837	20.0896	19.3929	19.8739		28.473	22.1387	0	0.920157	2.7103	Q9DB20;A0A338P7G3;A0A338P776;F6XVM5;F7D3P8	Q9DB20;A0A338P7G3;A0A338P776	ATP synthase subunit O, mitochondrial	Atp5o
17.7587	17.8285	16.7124	16.8325	17.45	13.7097		1.4312	15.5191	0.0031008	0.44586	-2.21372	Q9DB42	Q9DB42	Zinc finger protein 593	Znf593
18.0258	17.6577	20.8009	20.7009	20.6049	20.8579	+	96.507	22.2944	0	2.22767	2.88966	Q9DB77;A0A140LI98	Q9DB77	Cytochrome b-c1 complex subunit 2, mitochondrial	Uqcrc2
17.611	17.6384	17.9868	19.2485	17.2614	16.1965		21.842	20.9991	0	0.629614	-0.895767	Q9DB96	Q9DB96	Neuroguidin	Ngdn
17.8179	17.7844	20.4964	20.1825	20.255	20.4186	+	7.1037	22.0039	0	2.96528	2.53568	Q9DBG7;F6VF36	Q9DBG7;F6VF36	Signal recognition particle receptor subunit alpha	Srpr
18.1526	19.2491	20.0916	19.9396	15.59	15.5831	+	38.732	21.4763	0	1.52839	-3.11426	Q9DBH5	Q9DBH5	Vesicular integral-membrane protein VIP36	Lman2
17.7612	18.7172	16.4323	19.4425	17.4511	15.3363		2.0563	20.3335	0	0.597345	-1.8455	Q9DBJ1;O70250	Q9DBJ1;O70250	Phosphoglycerate mutase 1;Phosphoglycerate mutase 2	Pgam1;Pgam2
19.9772	17.476	17.7867	16.5542	17.5719	16.3725		5.1883	17.4253	0	0.477149	-1.7544	Q9DBY8	Q9DBY8	Nuclear valosin-containing protein-like	Nvl
17.7632	17.1511	17.447	16.2245	17.6043	16.5764		2.5783	18.2096	0	0.220264	-0.366787	Q9DC70	Q9DC70	NADH dehydrogenase [ubiquinone] iron-sulfur protein 7, mitochondrial	Ndufs7
17.5346	17.6053	17.254	15.9692	17.0323	17.3004		11.108	17.6293	0	0.997831	-0.403609	Q9DCC4	Q9DCC4	Pyrroline-5-carboxylate reductase 3	Pycrl
22.3828	21.9342	22.4542	22.5616	22.4822	22.5908		165.62	24.2935	0	0.614304	0.378033	Q9DCD0	Q9DCD0	6-phosphogluconate dehydrogenase, decarboxylating	Pgd
18.155	15.9247	21.3967	21.8617	21.3998	21.7747	+	115.15	23.7971	0	1.24693	4.54742	Q9DCF9	Q9DCF9	Translocon-associated protein subunit gamma	Ssr3
18.1152	16.7378	21.3536	21.1662	21.1307	21.1891	+	66.083	22.7905	0	1.48893	3.73339	Q9DCH4	Q9DCH4	Eukaryotic translation initiation factor 3 subunit F	Eif3f
18.7379	16.4413	22.4272	22.2657	21.9312	22.0112	+	67.074	23.792	0	1.20481	4.38161	Q9DCL9;D3Z6P1;D6RCU8	Q9DCL9	Multifunctional protein ADE2;Phosphoribosylaminoimidazole-succinocarboxamide synthase;Phosphoribosylaminoimidazole carboxylase	Paics
16.6785	18.0697	17.2617	15.5425	17.5295	15.9715		1.9626	18.9633	0	0.213936	-0.623607	Q9DCW4;A0A0U1RNR3;A0A0U1RNK9;A0A0U1RNP5;A0A0N4SVE0;A0A0U1RQB4;A0A0N4SWE9	Q9DCW4;A0A0U1RNR3;A0A0U1RNK9;A0A0U1RNP5;A0A0N4SVE0	Electron transfer flavoprotein subunit beta	Etfb
17.8303	17.5907	15.6198	16.5689	17.6384	17.7891		4.1865	19.1109	0	0.00714651	0.00326729	Q9EP72	Q9EP72	ER membrane protein complex subunit 7	Emc7
17.5099	18.1482	20.7425	20.7536	20.9206	17.2096		45.182	22.3969	0	0.237375	1.23606	Q9EPE9	Q9EPE9	Manganese-transporting ATPase 13A1	Atp13a1
17.2767	16.2963	17.5774	16.3783	17.2429	15.5523		1.7894	17.5774	0.00083472	0.137237	-0.388963	Q9EPL8;A0A140LHD0	Q9EPL8;A0A140LHD0	Importin-7	Ipo7
24.4917	16.6091	17.4481	15.0772	16.6917	15.6449		1.3124	23.8601	0.005287	0.414214	-4.38213	Q9EPN1	Q9EPN1	Neurobeachin	Nbea
18.5733	15.1308	21.2468	21.3604	20.8952	21.077		18.374	22.7841	0	0.858254	4.13403	Q9EPU0	Q9EPU0	Regulator of nonsense transcripts 1	Upf1
18.6454	17.6785	21.5494	21.2978	21.1578	21.3493	+	145.81	22.896	0	1.61116	3.09155	Q9EQH3	Q9EQH3	Vacuolar protein sorting-associated protein 35	Vps35
18.9893	18.3701	22.1372	22.2544	22.5278	22.6584	+	58.028	23.9562	0	2.18885	3.91334	Q9ER72	Q9ER72	Cysteine--tRNA ligase, cytoplasmic	Cars
25.7422	25.516	23.8752	23.6219	24.5054	24.5832	+	244.5	25.8064	0	1.92279	-1.08475	Q9ERK4;E9Q1T9;F6ZEW4;E9QAX7;F7D1H9	Q9ERK4;E9Q1T9;F6ZEW4	Exportin-2	Cse1l
17.6655	21.1274	17.5667	17.2668	16.4728	16.4617		83.649	19.1749	0	0.63325	-2.92916	Q9EST5	Q9EST5	Acidic leucine-rich nuclear phosphoprotein 32 family member B	Anp32b
18.3591	17.2798	23.0846	23.2072	23.2197	22.8015	+	321.06	24.6858	0	1.91356	5.19113	Q9ESX5;B7ZCL7;F6YUI5;A2AN81;F6S1S5	Q9ESX5;B7ZCL7	H/ACA ribonucleoprotein complex subunit 4	Dkc1
18.1455	18.2929	17.5986	18.0943	17.294	15.6236		1.1344	19.2759	0.0094271	0.768043	-1.76042	Q9ET30	Q9ET30	Transmembrane 9 superfamily member 3	Tm9sf3
18.877	18.3905	20.8266	20.5377	20.5651	21.0028	+	235.07	22.4082	0	1.65013	2.15023	Q9JHU4;F6ZX84	Q9JHU4	Cytoplasmic dynein 1 heavy chain 1	Dync1h1
18.1894	17.8867	17.0367	18.1978	17.0651	16.8133	+	23.927	17.8566	0	1.51385	-1.09881	Q9JI13	Q9JI13	Something about silencing protein 10	Utp3
18.2766	16.9602	20.0696	19.9343	15.4674	16.9068		3.9513	21.6191	0	0.552949	-1.43127	Q9JIF7	Q9JIF7	Coatomer subunit beta	Copb1
19.2515	18.3498	17.6321	16.5846	16.3349	14.9343	+	1.2077	17.6554	0.0095378	1.20232	-3.16606	Q9JIH2	Q9JIH2	Nuclear pore complex protein Nup50	Nup50
20.4132	20.0885	19.6173	19.4589	19.4555	19.5175		4.9736	21.6016	0	1.35939	-0.764338	Q9JII6;B1AXW3	Q9JII6;B1AXW3	Alcohol dehydrogenase [NADP(+)]	Akr1a1
23.3914	23.3817	26.1311	26.0549	25.991	26.0031	+	323.31	27.6706	0	5.05009	2.61051	Q9JIK5	Q9JIK5	Nucleolar RNA helicase 2	Ddx21
17.0814	18.3031	17.2435	17.8426	16.4333	16.6397		1.5661	18.9249	0.0032	0.692297	-1.15576	Q9JJE7	Q9JJE7	Fatty acid desaturase 3	Fads3
17.3128	18.0829	21.7406	22.0483	21.7661	22.167	+	84.196	24.3662	0	1.99202	4.26874	Q9JJI8	Q9JJI8	60S ribosomal protein L38	Rpl38
16.7994	18.567	16.7021	15.4302	17.0049	16.5243		6.0726	19.099	0	0.375195	-0.91858	Q9JJU8	Q9JJU8	SH3 domain-binding glutamic acid-rich-like protein	Sh3bgrl
18.2285	17.4432	21.5173	21.6951	21.5174	21.4933	+	83.33	23.1261	0	1.94819	3.66949	Q9JKB3	Q9JKB3	Y-box-binding protein 3	Ybx3
17.2973	21.1958	21.3975	21.2525	21.6166	21.8499		118.78	23.3192	0	0.480375	2.48671	Q9JKF1;Q3UQP1;F8VQ29;Q3UQ44	Q9JKF1	Ras GTPase-activating-like protein IQGAP1	Iqgap1
17.8297	17.2611	16.4871	17.8517	16.0845	16.6537		3.4623	18.2189	0	1.0011	-1.17631	Q9JKX4	Q9JKX4	Protein AATF	Aatf
20.0411	20.2749	19.6982	19.5521	17.2611	19.3495		1.5147	21.9447	0.0031671	0.657765	-1.8527	Q9JMG1	Q9JMG1	Endothelial differentiation-related factor 1	Edf1
18.242	17.5448	19.9346	17.5903	17.033	16.7672		49.135	20.0261	0	0.932356	-0.993299	Q9JMH6	Q9JMH6	Thioredoxin reductase 1, cytoplasmic	Txnrd1
17.3961	17.1043	17.2937	16.3191	17.8893	22.1709		1.3774	25.8798	0.0038344	0.488772	2.77989	Q9R0T7;Q9QUK9	Q9R0T7;Q9QUK9		Try4;Try5
18.2024	17.324	21.2063	21.0917	20.7539	21.0745	+	28.268	22.6265	0	1.67133	3.15099	Q9QUR6	Q9QUR6	Prolyl endopeptidase	Prep
21.2459	17.6795	17.0689	16.2993	17.8537	16.8829		2.1223	20.4508	0	0.426361	-2.0944	Q9QUR7	Q9QUR7	Peptidyl-prolyl cis-trans isomerase NIMA-interacting 1	Pin1
19.8853	17.2638	15.4994	15.6212	17.2422	15.9273		3.3526	20.0381	0	0.511943	-1.98983	Q9QWF0	Q9QWF0	Chromatin assembly factor 1 subunit A	Chaf1a
17.8635	17.2659	16.8984	17.2943	17.4161	16.9823		3.8044	16.6698	0	0.370082	-0.365532	Q9QXB9	Q9QXB9	Developmentally-regulated GTP-binding protein 2	Drg2
21.858	21.7583	16.3516	15.5055	16.5122	16.1884	+	5.7115	20.4725	0	3.01696	-5.45784	Q9QXK2;E9Q392;D3Z734;D3Z733;F6ZKR0;W4VSP9	Q9QXK2;E9Q392;D3Z734;D3Z733	E3 ubiquitin-protein ligase RAD18	Rad18
22.1413	22.7342	24.0149	24.0194	24.078	24.1567	+	323.31	25.7556	0	1.5189	1.67958	Q9QXS1;E9Q3W4;A0A3B2W7J8;A0A0R4J223;E9Q9J6;A0A0R4J221;A0A0R4J218;E9PW24	Q9QXS1;E9Q3W4	Plectin	Plec
19.8663	19.9432	20.5684	20.36	20.6496	20.3631		18.953	22.5377	0	1.25394	0.60159	Q9QYB1	Q9QYB1	Chloride intracellular channel protein 4	Clic4
18.3747	17.0231	20.0759	19.9611	19.8952	19.6275	+	52.383	21.8693	0	1.01857	2.06241	Q9R1R8;Q9QYF1	Q9R1R8;Q9QYF1	Retinol dehydrogenase 11	Rdh11
17.1688	18.6383	16.4482	16.4897	18.5782	16.4004		1.4615	18.9008	0.0031153	0.106595	-0.414257	Q9QYJ0	Q9QYJ0	DnaJ homolog subfamily A member 2	Dnaja2
18.526	17.682	20.5733	20.1996	16.7365	20.2209		98.159	21.8058	0	0.068648	0.374682	Q9QZE5;Q9QXK3	Q9QZE5	Coatomer subunit gamma-1	Copg1
25.1395	25.5406	22.7241	22.6077	23.0614	23.1045	+	154.29	25.2071	0	2.10288	-2.25712	Q9QZQ8	Q9QZQ8	Core histone macro-H2A.1	H2afy
17.6589	17.6397	19.4541	19.5065	17.1367	16.0252		129.75	20.1952	0	0.71102	-1.06835	Q9R045	Q9R045	Angiopoietin-related protein 2	Angptl2
17.7031	18.3011	17.0098	16.49	18.7348	16.2042		21.304	19.9529	0	0.141592	-0.532563	Q9R099;F8WI46;D3YZH8	Q9R099	Transducin beta-like protein 2	Tbl2
19.3013	16.114	19.4396	15.1359	17.3262	16.2487		2.2387	20.3021	0	0.194315	-0.920153	Q9R0E2;F6WNR1	Q9R0E2;F6WNR1	Procollagen-lysine,2-oxoglutarate 5-dioxygenase 1	Plod1
22.5616	22.7419	21.5407	21.378	21.0942	21.5877	+	23.442	24.1221	0	1.42135	-1.31083	Q9R0P5	Q9R0P5	Destrin	Dstn
18.9717	17.3372	16.1056	19.1625	16.3068	15.6809		3.4211	19.9454	0	0.878535	-2.16061	Q9R0Y5;Z4YN97;A0A0A6YXW8	Q9R0Y5;Z4YN97	Adenylate kinase isoenzyme 1	Ak1
18.0994	16.9969	20.8057	21.0328	18.5999	15.9429		22.315	21.6481	0	0.0628828	-0.276715	Q9R118	Q9R118	Serine protease HTRA1	Htra1
22.2961	22.2952	17.2615	18.9987	20.4279	20.1538	+	38.774	21.8608	0	2.33335	-2.00482	Q9R190;H3BLE1	Q9R190	Metastasis-associated protein MTA2	Mta2
23.082	16.7493	22.3555	22.0344	21.4997	21.5146		3.5161	23.4193	0	0.177106	1.59149	Q9R1J0	Q9R1J0	Sterol-4-alpha-carboxylate 3-dehydrogenase, decarboxylating	Nsdhl
18.5454	18.1262	19	19.5233	19.0763	19.1585		83.797	21.6334	0	1.17239	0.781569	Q9R1P1;D3YUM8	Q9R1P1	Proteasome subunit beta type-3	Psmb3
20.2222	19.9019	17.0374	16.0488	15.59	15.7084	+	2.712	19.054	0	2.82568	-4.41287	Q9R1T2	Q9R1T2	SUMO-activating enzyme subunit 1;SUMO-activating enzyme subunit 1, N-terminally processed	Sae1
21.1269	21.1103	17.8786	15.3905	17.5449	16.2881	+	7.3714	19.6299	0	1.66464	-4.20209	Q9R207;A2AMG5	Q9R207;A2AMG5	Nibrin	Nbn
17.8399	18.2028	17.8436	17.8397	17.9095	17.014		7.7293	17.8003	0	0.436091	-0.559613	Q9WTP6	Q9WTP6	Adenylate kinase 2, mitochondrial;Adenylate kinase 2, mitochondrial, N-terminally processed	Ak2
17.3369	18.568	17.2429	18.1605	17.9719	16.5669		67.053	20.2142	0	0.267076	-0.683068	Q9WTX5;E9Q3Q7;E9PUV4	Q9WTX5;E9Q3Q7;E9PUV4	S-phase kinase-associated protein 1	Skp1;Skp1a
25.9304	27.412	17.4137	19.3964	22.4581	22.5108	+	198.17	25.5851	0	1.52367	-4.18679	Q9WU62	Q9WU62	Inner centromere protein	Incenp
20.5761	17.1622	20.3882	20.2703	20.8632	20.6048		118.19	22.2457	0	0.409224	1.86489	Q9WU78	Q9WU78	Programmed cell death 6-interacting protein	Pdcd6ip
18.4767	17.8988	19.8797	20.1179	19.6452	19.4237	+	3.6981	21.4319	0	1.31027	1.34673	Q9WUA2;A0A087WS80	Q9WUA2	Phenylalanine--tRNA ligase beta subunit	Farsb
18.6858	21.3678	20.6821	20.8716	20.8751	20.9201		8.4322	23.1827	0	0.2345	0.870797	Q9WUK2	Q9WUK2	Eukaryotic translation initiation factor 4H	Eif4h
21.0628	20.683	16.5257	16.2622	16.5263	17.0932	+	2.8766	19.3791	0	2.1563	-4.0631	Q9WUK4	Q9WUK4	Replication factor C subunit 2	Rfc2
17.5616	17.672	17.2963	17.459	17.4613	17.527		25.39	18.9449	0	0.7067	-0.122613	Q9WUM4	Q9WUM4	Coronin-1C	Coro1c
15.9263	18.4488	15.7858	16.7828	17.4321	16.4195		1.6089	17.3111	0.0032415	0.0629525	-0.261745	Q9WUM5	Q9WUM5	Succinyl-CoA ligase [ADP/GDP-forming] subunit alpha, mitochondrial	Suclg1
18.2113	17.7185	18.5553	15.7221	15.9591	17.7337		5.4401	19.1873	0	0.457849	-1.1185	Q9WUV0;D3Z0X3	Q9WUV0;D3Z0X3	Origin recognition complex subunit 5	Orc5
20.8043	20.7142	16.7461	18.1037	18.8529	16.0399		11.249	20.6333	0	0.845325	-3.31285	Q9WV03;Q9WTJ8	Q9WV03;Q9WTJ8	Protein FAM50A;Protein FAM50B	Fam50a;Fam50b
19.0566	18.8558	19.6649	19.8216	19.7784	19.6326		69.467	21.9274	0	1.57933	0.749269	Q9WV55;A0A3B2W837	Q9WV55;A0A3B2W837	Vesicle-associated membrane protein-associated protein A	Vapa
22.3616	22.4642	21.7945	22.2407	22.3005	22.2027		169.51	24.7867	0	0.822127	-0.16131	Q9WVA4;A0A0A6YXG6;Q9R1Q8	Q9WVA4	Transgelin-2	Tagln2
18.2009	17.8111	17.1392	16.022	17.592	18.708		25.073	18.3484	0	0.0807997	0.144002	Q9Z0H1	Q9Z0H1	WD repeat-containing protein 46	Wdr46
22.671	22.9188	23.0827	23.1256	22.9491	22.9882		127.87	24.8234	0	0.522668	0.173767	Q9Z0N1;A2AAW9	Q9Z0N1;A2AAW9	Eukaryotic translation initiation factor 2 subunit 3, X-linked	Eif2s3x
17.7095	16.5418	17.3254	18.6532	16.6848	17.2994		9.3521	19.2101	0	0.0663713	-0.133579	Q9Z0N2	Q9Z0N2	Eukaryotic translation initiation factor 2 subunit 3, Y-linked	Eif2s3y
24.4411	24.3927	16.324	16.318	21.4728	21.7987	+	72.975	23.5813	0	2.45707	-2.78117	Q9Z103	Q9Z103	Activity-dependent neuroprotector homeobox protein	Adnp
21.2522	20.9628	21.034	20.9127	20.6244	20.626		52.19	22.7693	0	1.10004	-0.482251	Q9Z110;D3Z0B4	Q9Z110	Delta-1-pyrroline-5-carboxylate synthase;Glutamate 5-kinase;Gamma-glutamyl phosphate reductase	Aldh18a1
17.824	16.7876	17.3705	16.5127	16.6043	16.2248		1.2798	18.6369	0.005997	0.606132	-0.891258	Q9Z1D1	Q9Z1D1	Eukaryotic translation initiation factor 3 subunit G	Eif3g
17.6461	19.3492	18.5766	17.2281	15.3746	15.3198	+	1.466	19.4562	0.0031177	1.18063	-3.15049	Q9Z1F9	Q9Z1F9	SUMO-activating enzyme subunit 2	Uba2
22.974	22.7742	15.6198	18.426	21.7097	21.8833	+	47.119	22.5514	0	1.83111	-1.0776	Q9Z1N2	Q9Z1N2	Origin recognition complex subunit 1	Orc1
23.5451	22.2001	22.2059	22.3415	22.2832	22.2363		101.78	24.3876	0	0.338599	-0.612856	Q9Z1Q5	Q9Z1Q5	Chloride intracellular channel protein 1	Clic1
23.5226	23.5676	26.9588	26.8525	27.0776	27.0166	+	323.31	28.5858	0	3.93147	3.50202	Q9Z1Q9;G3UY93;G3UZ22;G3UYW2;G3UZX1	Q9Z1Q9;G3UY93	Valine--tRNA ligase	Vars
18.0991	16.2424	19.0995	18.9329	17.2398	15.9678		3.0589	20.3606	0	0.177581	-0.566987	Q9Z1Z2	Q9Z1Z2	Serine-threonine kinase receptor-associated protein	Strap
19.9902	19.9692	20.1094	19.8087	19.6941	20.1699		57.9	22.0573	0	0.0656389	-0.0477066	Q9Z204;A0A2I3BRM6;A0A2I3BQH3	Q9Z204;A0A2I3BRM6	Heterogeneous nuclear ribonucleoproteins C1/C2	Hnrnpc
24.2386	23.0188	18.4729	17.9777	18.1614	19.5977	+	40.521	22.6696	0	1.42972	-4.7491	Q9Z277	Q9Z277	Tyrosine-protein kinase BAZ1B	Baz1b
16.806	17.7601	17.5403	14.8149	16.4398	16.1458		1.5914	17.6621	0.0032232	0.731081	-0.99021	Q9Z2I9	Q9Z2I9	Succinyl-CoA ligase [ADP-forming] subunit beta, mitochondrial	Sucla2
17.1659	16.7712	17.8984	16.8133	18.9734	17.673		9.7964	19.0715	0	0.734325	1.35471	Q9Z2U1	Q9Z2U1	Proteasome subunit alpha type-5	Psma5
22.1259	22.4416	21.5849	21.7607	21.8447	21.7693		173.56	23.7377	0	1.00463	-0.47676	Q9Z2X1;J3QMT0;J3QM80;J3QP45;J3QNH2;J3QMV8	Q9Z2X1;J3QMT0;J3QM80	Heterogeneous nuclear ribonucleoprotein F;Heterogeneous nuclear ribonucleoprotein F, N-terminally processed	Hnrnpf
17.1829	17.0745	18.269	18.3108	18.1333	18.3566	+	39.974	20.6258	0	1.91598	1.11621	Q9Z315	Q9Z315	U4/U6.U5 tri-snRNP-associated protein 1	Sart1
17.0912	17.3365	16.5396	15.2429	16.0402	21.816		1.3493	24.0652	0.0045802	0.212346	1.71423	S4R1W1;V9GX06;A0A0R4J0X7;S4R2G5;Q64467;S4R1W8;S4R1N5;V9GXK0	S4R1W1	Glyceraldehyde-3-phosphate dehydrogenase	Gm3839
