# Supplementary material for: TRF1 averts chromatin remodelling, recombination and replication dependent-break induced replication at mouse telomeres
Source: eLife. 2020 Jan 14;9:e49817. doi: 10.7554/eLife.49817 (PMC6986873; doi:10.7554/eLife.49817)
Supplement: Figure 1—source data 3. — Related to Figure 1F. [file elife-49817-fig1-data3.xlsx]

## Sheet: Scbl vs Telo_TRF1 mutant
Protein IDs	Majority protein IDs	Peptide counts (all)	Peptide counts (razor+unique)	Peptide counts (unique)	Fasta headers	Number of proteins	Peptides	Razor + unique peptides	Unique peptides	Peptides G1Lane4	Peptides G2Lane3	Razor + unique peptides G1Lane4	Razor + unique peptides G2Lane3	Unique peptides G1Lane4	Unique peptides G2Lane3	Sequence coverage [%]	Unique + razor sequence coverage [%]	Unique sequence coverage [%]	Mol. weight [kDa]	Sequence length	Sequence lengths	Q-value	Score	Identification type G1Lane4	Identification type G2Lane3	Sequence coverage G1Lane4 [%]	Sequence coverage G2Lane3 [%]	Intensity	Intensity G1Lane4	Intensity G2Lane3	LFQ intensity G1Lane4	LFQ intensity G2Lane3	MS/MS Count G1Lane4	MS/MS Count G2Lane3	MS/MS Count	id	Peptide IDs	Peptide is razor	Mod. peptide IDs	Evidence IDs	MS/MS IDs	Best MS/MS	Oxidation (M) site IDs	Oxidation (M) site positions	LFQ intensity TRF1 deleted cells (telo)	LFQ intensity Scramble probe in TRF1 deleted cells
sp|P07091|S10A4_MOUSE	sp|P07091|S10A4_MOUSE	2	2	2	>sp|P62821|RAB1A_MOUSE Ras-related protein Rab-1A OS=Mus musculus GN=Rab1A PE=1 SV=3	1	1	1	1	1	1	1	1	1	1	8.3	8.3	8.3	22.677	205	205	0	6.7582	By MS/MS	By MS/MS	8.3	8.3	19809	19809	0	8957.1	0	2	1	3	244	1347	TRUE	1361	10666;10667	6059;6060;6061	6060	170;171	166;168	1	0		Normalised LFQ MS intensities (fold over max)
sp|P07356|ANXA2_MOUSE	sp|P07356|ANXA2_MOUSE	6	6	6	>sp|Q62093|SRSF2_MOUSE Serine/arginine-rich splicing factor 2 OS=Mus musculus GN=Srsf2 PE=1 SV=4	1	1	1	1	1	0	1	0	1	0	7.2	7.2	7.2	25.476	221	221	0.0095057	6.1682	By MS/MS	By matching	7.2	0	39362	39362	0	9618.1	0	1	0	1	364	1702	TRUE	1731	13998	8122	8122	237	13	1	0		0	0.1
sp|P07901|HS90A_MOUSE	sp|P07901|HS90A_MOUSE	8	5	5	>sp|P97823|LYPA1_MOUSE Acyl-protein thioesterase 1 OS=Mus musculus GN=Lypla1 PE=1 SV=1	1	2	2	2	2	0	2	0	2	0	9.1	9.1	9.1	24.687	230	230	0	11.719	By MS/MS	By matching	9.1	0	28282	28282	0	12121	0	2	0	2	293	182;246	True;True	183;247	1399;1824;1825	922;1206	922;1206			1	0
sp|P08113|ENPL_MOUSE	sp|P08113|ENPL_MOUSE	5	3	3	>sp|Q9CQE8|CN166_MOUSE UPF0568 protein C14orf166 homolog OS=Mus musculus PE=2 SV=1	1	1	1	1	1	0	1	0	1	0	6.6	6.6	6.6	28.152	244	244	0	24.721	By MS/MS	By matching	6.6	0	31963	31963	0	14453	0	3	0	3	511	1340	TRUE	1354	10622;10623	6031;6032;6033	6031			1	0
sp|P08122|CO4A2_MOUSE	sp|P08122|CO4A2_MOUSE	1	1	1	>sp|P58771|TPM1_MOUSE Tropomyosin alpha-1 chain OS=Mus musculus GN=Tpm1 PE=1 SV=1	1	1	1	1	1	0	1	0	1	0	3.9	3.9	3.9	32.68	284	284	0.0078895	6.2726	By MS/MS	By matching	3.9	0	48249	48249	0	14876	0	1	0	1	208	1441	TRUE	1456	11353;11354	6412	6412			1	0
sp|P08249|MDHM_MOUSE	sp|P08249|MDHM_MOUSE	8	8	8	>sp|Q9D1G1|RAB1B_MOUSE Ras-related protein Rab-1B OS=Mus musculus GN=Rab1b PE=1 SV=1	1	2	2	2	2	1	2	1	2	1	13.4	13.4	13.4	22.187	201	201	0	11.905	By MS/MS	By MS/MS	13.4	5	53590	37898	15692	16314	0	2	1	3	538	1312;1346	True;True	1325;1360	10476;10477;10478;10665	5936;5937;6058	5937;6058	344;345;346	1;163;165	1	0
sp|P09055|ITB1_MOUSE	sp|P09055|ITB1_MOUSE	2	2	2	>sp|Q8BGD9|IF4B_MOUSE Eukaryotic translation initiation factor 4B OS=Mus musculus GN=Eif4b PE=1 SV=1	1	1	1	1	1	0	1	0	1	0	2.8	2.8	2.8	68.839	611	611	0.0041068	6.4198	By MS/MS	By matching	2.8	0	15761	15761	0	18653	0	1	0	1	415	1643	TRUE	1671	13491	7817	7817			1	0
sp|P09103|PDIA1_MOUSE	sp|P09103|PDIA1_MOUSE	4	4	4	>sp|Q9DBZ1|IKIP_MOUSE Inhibitor of nuclear factor kappa-B kinase-interacting protein OS=Mus musculus GN=Ikbip PE=2 SV=2	1	1	1	1	1	0	1	0	1	0	4	4	4	42.532	373	373	0.0041929	6.4459	By MS/MS	By matching	4	0	18989	18989	0	18761	0	2	0	2	551	1157	TRUE	1166	9464;9465	5486;5487	5486			1	0
sp|P09405|NUCL_MOUSE	sp|P09405|NUCL_MOUSE	14	14	14	>sp|Q61166|MARE1_MOUSE Microtubule-associated protein RP/EB family member 1 OS=Mus musculus GN=Mapre1 PE=1 SV=3	1	1	1	1	1	1	1	1	1	1	6	6	6	30.016	268	268	0	7.1692	By MS/MS	By matching	6	6	102090	63973	38113	18849	0	1	0	1	346	316	TRUE	318	2398;2399;2400	1584	1584			1	0
sp|P09411|PGK1_MOUSE;sp|P09041|PGK2_MOUSE	sp|P09411|PGK1_MOUSE	4;1	4;1	4;1	>sp|Q9DBP5|KCY_MOUSE UMP-CMP kinase OS=Mus musculus GN=Cmpk1 PE=1 SV=1	1	1	1	1	1	0	1	0	1	0	5.6	5.6	5.6	22.165	196	196	0.0077973	6.2486	By MS/MS	By matching	5.6	0	47983	47983	0	19732	0	1	0	1	550	1688	TRUE	1717	13906	8048	8048			1	0
sp|P09602|HMGN2_MOUSE	sp|P09602|HMGN2_MOUSE	3	3	3	>sp|Q60930|VDAC2_MOUSE Voltage-dependent anion-selective channel protein 2 OS=Mus musculus GN=Vdac2 PE=1 SV=2	1	1	1	1	1	0	1	0	1	0	6.4	6.4	6.4	31.732	295	295	0	21.907	By MS/MS	By matching	6.4	0	64485	64485	0	19791	0	3	0	3	341	1492	TRUE	1507	11802;11803	6613;6614;6615	6613			1	0
sp|Q3THW5|H2AV_MOUSE;sp|P0C0S6|H2AZ_MOUSE	sp|Q3THW5|H2AV_MOUSE;sp|P0C0S6|H2AZ_MOUSE	3;3	2;2	2;2	>sp|Q5F2E7|NUFP2_MOUSE Nuclear fragile X mental retardation-interacting protein 2 OS=Mus musculus GN=Nufip2 PE=1 SV=1	1	1	1	1	1	0	1	0	1	0	1.9	1.9	1.9	75.656	692	692	0.0077071	6.2107	By MS/MS	By matching	1.9	0	17150	17150	0	20136	0	1	0	1	330	1600	TRUE	1628	13217	7684	7684			1	0
sp|P62984|RL40_MOUSE;sp|P62983|RS27A_MOUSE;sp|P0CG49|UBB_MOUSE;sp|P0CG50|UBC_MOUSE	sp|P62984|RL40_MOUSE;sp|P62983|RS27A_MOUSE;sp|P0CG49|UBB_MOUSE;sp|P0CG50|UBC_MOUSE	5;5;5;5	5;5;5;5	5;5;5;5	>sp|Q9R0Q7|TEBP_MOUSE Prostaglandin E synthase 3 OS=Mus musculus GN=Ptges3 PE=1 SV=1	1	1	1	1	1	0	1	0	1	0	8.1	8.1	8.1	18.721	160	160	0.0078278	6.2524	By MS/MS	By matching	8.1	0	49277	49277	0	21365	0	1	0	1	585	1234	TRUE	1244	9987;9988	5717	5717			1	0
sp|P10107|ANXA1_MOUSE	sp|P10107|ANXA1_MOUSE	8	8	8	>sp|Q9JMH6|TRXR1_MOUSE Thioredoxin reductase 1, cytoplasmic OS=Mus musculus GN=Txnrd1 PE=1 SV=3	1	1	1	1	1	0	1	0	1	0	1.8	1.8	1.8	67.083	613	613	0	7.2357	By MS/MS	By matching	1.8	0	22457	22457	0	26577	0	3	0	3	575	822	TRUE	829	6050;6051;6052	3561;3562;3563	3562			1	0
sp|P10126|EF1A1_MOUSE;sp|P62631|EF1A2_MOUSE	sp|P10126|EF1A1_MOUSE;sp|P62631|EF1A2_MOUSE	9;6	9;6	9;6	>sp|O55234|PSB5_MOUSE Proteasome subunit beta type-5 OS=Mus musculus GN=Psmb5 PE=1 SV=3	1	1	1	1	1	0	1	0	1	0	4.9	4.9	4.9	28.532	264	264	0	9.5032	By MS/MS	By matching	4.9	0	62914	62914	0	26997	0	2	0	2	57	274	TRUE	276	2068;2069	1371;1372	1372			1	0
sp|P10639|THIO_MOUSE	sp|P10639|THIO_MOUSE	2	2	2	>sp|Q61655|DD19A_MOUSE ATP-dependent RNA helicase DDX19A OS=Mus musculus GN=Ddx19a PE=2 SV=2	1	1	1	1	1	0	1	0	1	0	3.1	3.1	3.1	53.932	478	478	0.0060729	6.3608	By MS/MS	By matching	3.1	0	26413	26413	0	28858	0	2	0	2	353	1617	TRUE	1645	13344;13345	7732;7733	7732			1	0
sp|Q8CGP2|H2B1P_MOUSE;sp|Q6ZWY9|H2B1C_MOUSE;sp|Q64525|H2B2B_MOUSE;sp|Q64478|H2B1H_MOUSE;sp|Q64475|H2B1B_MOUSE;sp|P10854|H2B1M_MOUSE;sp|P10853|H2B1F_MOUSE;sp|Q8CGP1|H2B1K_MOUSE;sp|Q9D2U9|H2B3A_MOUSE;sp|Q8CGP0|H2B3B_MOUSE;sp|P70696|H2B1A_MOUSE;sp|Q64524|H2B2E_MOUSE	sp|Q8CGP2|H2B1P_MOUSE;sp|Q6ZWY9|H2B1C_MOUSE;sp|Q64525|H2B2B_MOUSE;sp|Q64478|H2B1H_MOUSE;sp|Q64475|H2B1B_MOUSE;sp|P10854|H2B1M_MOUSE;sp|P10853|H2B1F_MOUSE;sp|Q8CGP1|H2B1K_MOUSE;sp|Q9D2U9|H2B3A_MOUSE;sp|Q8CGP0|H2B3B_MOUSE;sp|P70696|H2B1A_MOUSE;sp|Q64524|H2B2E_MOUSE	9;9;9;9;9;9;9;8;6;6;6;5	9;9;9;9;9;9;9;8;6;6;6;5	9;9;9;9;9;9;9;8;6;6;6;5	>sp|Q9ER72|SYCC_MOUSE Cysteine--tRNA ligase, cytoplasmic OS=Mus musculus GN=Cars PE=2 SV=2	1	1	1	1	1	0	1	0	1	0	1.8	1.8	1.8	94.859	831	831	0	44.961	By MS/MS	By matching	1.8	0	29197	29197	0	29197	0	2	0	2	561	191	TRUE	192	1446;1447	958;959	959			1	0
sp|P10922|H10_MOUSE	sp|P10922|H10_MOUSE	20	20	20	>sp|P47758|SRPRB_MOUSE Signal recognition particle receptor subunit beta OS=Mus musculus GN=Srprb PE=1 SV=1	1	3	3	3	3	1	3	1	3	1	16.7	16.7	16.7	29.579	269	269	0	18.894	By MS/MS	By MS/MS	16.7	4.8	85401	70265	15136	29700	0	3	1	4	177	325;643;1474	True;True;True	327;650;1489	2457;2458;2459;4681;11691	1613;1614;2822;6550	1614;2822;6550			1	0
sp|P11087|CO1A1_MOUSE	sp|P11087|CO1A1_MOUSE	5	5	5	>sp|P09055|ITB1_MOUSE Integrin beta-1 OS=Mus musculus GN=Itgb1 PE=1 SV=1	1	2	2	2	2	1	2	1	2	1	3.4	3.4	3.4	88.231	798	798	0	11.338	By MS/MS	By matching	3.4	1.3	87470	69327	18143	29990	0	1	0	1	85	1201;1487	True;True	1211;1502	9740;11763;11764;11765	5608;6599	5608;6599			1	0
sp|P11276|FINC_MOUSE	sp|P11276|FINC_MOUSE	15	15	15	>sp|P28658|ATX10_MOUSE Ataxin-10 OS=Mus musculus GN=Atxn10 PE=1 SV=2	1	1	1	1	1	0	1	0	1	0	3.2	3.2	3.2	53.706	475	475	0	6.9772	By MS/MS	By matching	3.2	0	26148	26148	0	30945	0	2	0	2	145	1389	TRUE	1403	11014;11015	6220;6221	6221			1	0
sp|P11440|CDK1_MOUSE	sp|P11440|CDK1_MOUSE	2	2	2	>sp|P35293|RAB18_MOUSE Ras-related protein Rab-18 OS=Mus musculus GN=Rab18 PE=2 SV=2	1	2	2	2	2	1	2	1	2	1	12.6	12.6	12.6	23.035	206	206	0	11.866	By MS/MS	By matching	12.6	5.3	117270	72119	45155	31028	0	2	0	2	152	854;866	True;True	861;873	6284;6426;6427;6428	3699;3770	3699;3770			1	0
sp|P11499|HS90B_MOUSE	sp|P11499|HS90B_MOUSE	13	13	8	>sp|Q8BJA3|HMBX1_MOUSE Homeobox-containing protein 1 OS=Mus musculus GN=Hmbox1 PE=2 SV=1	1	1	1	1	1	0	1	0	1	0	3.8	3.8	3.8	47.115	419	419	0.0043011	6.5628	By MS/MS	By matching	3.8	0	26465	26465	0	31321	0	1	0	1	418	902	TRUE	910	6670	3902	3902			1	0
sp|P11983|TCPA_MOUSE	sp|P11983|TCPA_MOUSE	5	5	5	>sp|O35134|RPA1_MOUSE DNA-directed RNA polymerase I subunit RPA1 OS=Mus musculus GN=Polr1a PE=1 SV=2	1	1	1	1	1	1	1	1	1	1	0.8	0.8	0.8	194.11	1717	1717	0.0021786	6.5892	By MS/MS	By MS/MS	0.8	0.8	47943	28586	19357	31586	0	2	1	3	46	845	TRUE	852	6238;6239;6240	3667;3668;3669	3669			1	0
sp|P12970|RL7A_MOUSE	sp|P12970|RL7A_MOUSE	4	4	4	>sp|Q9CYI4|LUC7L_MOUSE Putative RNA-binding protein Luc7-like 1 OS=Mus musculus GN=Luc7l PE=2 SV=2	1	1	1	1	1	0	1	0	1	0	4	4	4	43.934	371	371	0	8.1102	By MS/MS	By matching	4	0	30514	30514	0	33658	0	2	0	2	528	80	TRUE	81	521;522	321;322	321			1	0
sp|P13020|GELS_MOUSE	sp|P13020|GELS_MOUSE	1	1	1	>sp|Q3UPL0|SC31A_MOUSE Protein transport protein Sec31A OS=Mus musculus GN=Sec31a PE=1 SV=2	1	1	1	1	1	0	1	0	1	0	1.3	1.3	1.3	133.57	1230	1230	0.0043197	6.5742	By MS/MS	By matching	1.3	0	29611	29611	0	34767	0	2	0	2	323	225	TRUE	226	1680	1113;1114	1114			1	0
sp|P14115|RL27A_MOUSE	sp|P14115|RL27A_MOUSE	2	2	2	>sp|P97855|G3BP1_MOUSE Ras GTPase-activating protein-binding protein 1 OS=Mus musculus GN=G3bp1 PE=1 SV=1	1	1	1	1	1	0	1	0	1	0	3.4	3.4	3.4	51.828	465	465	0.0041152	6.4216	By MS/MS	By matching	3.4	0	29732	29732	0	35186	0	2	0	2	294	583	TRUE	590	4308;4309	2603;2604	2603	203	109	1	0
sp|P14131|RS16_MOUSE	sp|P14131|RS16_MOUSE	3	3	3	>sp|P35979|RL12_MOUSE 60S ribosomal protein L12 OS=Mus musculus GN=Rpl12 PE=1 SV=2	1	2	2	2	2	0	2	0	2	0	19.4	19.4	19.4	17.804	165	165	0	13.842	By MS/MS	By matching	19.4	0	81410	81410	0	35445	0	3	0	3	157	462;1431	True;True	466;1446	3403;3404;11284	2139;2140;6382	2139;6382			1	0
sp|P14148|RL7_MOUSE	sp|P14148|RL7_MOUSE	2	2	2	>sp|O08547|SC22B_MOUSE Vesicle-trafficking protein SEC22b OS=Mus musculus GN=Sec22b PE=1 SV=3	1	1	1	1	1	0	1	0	1	0	6.5	6.5	6.5	24.74	215	215	0	7.5287	By MS/MS	By matching	6.5	0	82549	82549	0	35745	0	2	0	2	39	1384	TRUE	1398	10997;10998	6209;6210	6209			1	0
sp|P14206|RSSA_MOUSE	sp|P14206|RSSA_MOUSE	6	6	6	>sp|P62317|SMD2_MOUSE Small nuclear ribonucleoprotein Sm D2 OS=Mus musculus GN=Snrpd2 PE=3 SV=1	1	1	1	1	1	1	1	1	1	1	8.5	8.5	8.5	13.527	118	118	0.0042283	6.4685	By MS/MS	By matching	8.5	8.5	118510	82476	36033	35761	0	2	0	2	235	1394	TRUE	1408	11033;11034;11035	6233;6234	6233			1	0
sp|P14733|LMNB1_MOUSE	sp|P14733|LMNB1_MOUSE	4	4	4	>sp|Q3TIV5|ZC3HF_MOUSE Zinc finger CCCH domain-containing protein 15 OS=Mus musculus GN=Zc3h15 PE=1 SV=2	1	1	1	1	1	0	1	0	1	0	3.3	3.3	3.3	48.327	426	426	0	6.6824	By MS/MS	By matching	3.3	0	33347	33347	0	35775	0	1	0	1	316	413	TRUE	416	3016;3017	1942	1942			1	0
sp|P14824|ANXA6_MOUSE	sp|P14824|ANXA6_MOUSE	1	1	1	>sp|Q5EE38|ACD_MOUSE Adrenocortical dysplasia protein OS=Mus musculus GN=Acd PE=1 SV=1	1	1	1	1	1	0	1	0	1	0	3.1	3.1	3.1	44.713	416	416	0.0042553	6.4955	By MS/MS	By matching	3.1	0	31103	31103	0	36809	0	2	0	2	329	488	TRUE	493	3558;3559	2222;2223	2223			1	0
sp|P15864|H12_MOUSE;sp|Q07133|H1T_MOUSE	sp|P15864|H12_MOUSE	28;5	13;0	13;0	>sp|Q6PDQ2|CHD4_MOUSE Chromodomain-helicase-DNA-binding protein 4 OS=Mus musculus GN=Chd4 PE=1 SV=1	2	3	3	3	3	0	3	0	3	0	1.9	1.9	1.9	217.75	1915	1915;1946	0	17.951	By MS/MS	By matching	1.9	0	33760	33760	0	36836	0	3	0	3	386	210;509;763	True;True;True	211;514;770	1569;3667;5582;5583	1053;2273;3308	1053;2273;3308			1	0
sp|P16045|LEG1_MOUSE	sp|P16045|LEG1_MOUSE	3	3	3	>sp|Q9DCT2|NDUS3_MOUSE NADH dehydrogenase [ubiquinone] iron-sulfur protein 3, mitochondrial OS=Mus musculus GN=Ndufs3 PE=1 SV=2	1	1	1	1	1	1	1	1	1	1	4.9	4.9	4.9	30.149	263	263	0	19.9	By MS/MS	By MS/MS	4.9	4.9	86292	86292	0	37276	0	0	1	1	556	1577	TRUE	1605	13041;13042;13043	7553;7554	7554			1	0
sp|Q62095|DDX3Y_MOUSE;sp|P16381|DDX3L_MOUSE;sp|Q62167|DDX3X_MOUSE	sp|Q62095|DDX3Y_MOUSE;sp|P16381|DDX3L_MOUSE;sp|Q62167|DDX3X_MOUSE	3;3;3	3;3;3	3;3;3	>sp|O35737|HNRH1_MOUSE Heterogeneous nuclear ribonucleoprotein H OS=Mus musculus GN=Hnrnph1 PE=1 SV=3;>sp|P70333|HNRH2_MOUSE Heterogeneous nuclear ribonucleoprotein H2 OS=Mus musculus GN=Hnrnph2 PE=2 SV=1	2	2	2	2	2	0	2	0	2	0	6.9	6.9	6.9	49.199	449	449;449	0	16.331	By MS/MS	By matching	6.9	0	32352	32352	0	38287	0	3	0	3	53	1309;1672	True;True	1322;1700	10467;10468;13723	5930;5931;7941	5931;7941	49;50	1;2	1	0
sp|P16460|ASSY_MOUSE	sp|P16460|ASSY_MOUSE	1	1	1	>sp|Q9Z0X1|AIFM1_MOUSE Apoptosis-inducing factor 1, mitochondrial OS=Mus musculus GN=Aifm1 PE=1 SV=1	1	2	2	2	2	1	2	1	2	1	4.2	4.2	4.2	66.765	612	612	0	15.568	By MS/MS	By matching	4.2	1.8	53210	34433	18777	40643	0	3	0	3	593	124;1485	True;True	125;1500	798;11757;11758;11759;11760	522;6595;6596	522;6595			1	0
sp|P16858|G3P_MOUSE	sp|P16858|G3P_MOUSE	5	5	4	>sp|Q9WUA2|SYFB_MOUSE Phenylalanine--tRNA ligase beta subunit OS=Mus musculus GN=Farsb PE=2 SV=2	1	2	2	2	2	1	2	1	2	1	3.6	3.6	3.6	65.696	589	589	0	11.466	By MS/MS	By MS/MS	3.6	1.5	70372	38664	31708	41104	0	1	1	2	589	385;1855	True;True	388;1889	2840;2841;2842;15256	1854;8825	1854;8825			1	0
sp|P17095|HMGA1_MOUSE	sp|P17095|HMGA1_MOUSE	1	1	1	>sp|P62814|VATB2_MOUSE V-type proton ATPase subunit B, brain isoform OS=Mus musculus GN=Atp6v1b2 PE=1 SV=1	1	1	1	1	1	0	1	0	1	0	2.9	2.9	2.9	56.55	511	511	0.0060976	6.387	By MS/MS	By matching	2.9	0	39575	39575	0	43039	0	1	0	1	243	327	TRUE	329	2473;2474	1629	1629			1	0
sp|P17182|ENOA_MOUSE;sp|P17183|ENOG_MOUSE;sp|P21550|ENOB_MOUSE	sp|P17182|ENOA_MOUSE	11;2;1	11;2;1	11;2;1	>sp|Q99KE1|MAOM_MOUSE NAD-dependent malic enzyme, mitochondrial OS=Mus musculus GN=Me2 PE=2 SV=1	1	1	1	1	1	1	1	1	1	1	2.5	2.5	2.5	65.798	589	589	0	7.0046	By MS/MS	By MS/MS	2.5	2.5	54728	36841	17887	43429	0	2	3	5	498	196	TRUE	197	1463;1464;1465;1466;1467	971;972;973;974;975	973			1	0
sp|P17225|PTBP1_MOUSE;sp|Q8BHD7|PTBP3_MOUSE	sp|P17225|PTBP1_MOUSE;sp|Q8BHD7|PTBP3_MOUSE	2;1	2;1	2;1	>sp|Q9JMA1|UBP14_MOUSE Ubiquitin carboxyl-terminal hydrolase 14 OS=Mus musculus GN=Usp14 PE=1 SV=3	1	1	1	1	1	1	1	1	1	1	2.6	2.6	2.6	56.001	493	493	0	7.5896	By MS/MS	By MS/MS	2.6	2.6	44720	44720	0	44345	0	1	2	3	574	228	TRUE	229	1700;1701;1702;1703	1124;1125;1126	1125			1	0
sp|P17742|PPIA_MOUSE	sp|P17742|PPIA_MOUSE	3	3	3	>sp|Q01768|NDKB_MOUSE Nucleoside diphosphate kinase B OS=Mus musculus GN=Nme2 PE=1 SV=1;>sp|P15532|NDKA_MOUSE Nucleoside diphosphate kinase A OS=Mus musculus GN=Nme1 PE=1 SV=1	2	2	2	2	2	0	2	0	2	0	17.1	17.1	17.1	17.363	152	152;152	0	12.493	By MS/MS	By matching	17.1	0	105870	105870	0	45523	0	3	0	3	299	1368;1752	True;True	1382;1783	10832;10833;14369;14370	6144;8336;8337	6144;8337			1	0
sp|P17751|TPIS_MOUSE	sp|P17751|TPIS_MOUSE	3	3	3	>sp|Q8BYK6|YTHD3_MOUSE YTH domain-containing family protein 3 OS=Mus musculus GN=Ythdf3 PE=1 SV=2	1	2	2	2	2	0	2	0	2	0	4.4	4.4	4.4	63.961	585	585	0	12.549	By MS/MS	By matching	4.4	0	42646	42646	0	46428	0	4	0	4	437	139;1486	True;True	140;1501	880;881;11761;11762	563;564;6597;6598	563;6598			1	0
sp|Q61696|HS71A_MOUSE;sp|P17879|HS71B_MOUSE	sp|Q61696|HS71A_MOUSE;sp|P17879|HS71B_MOUSE	5;5	2;2	1;1	>sp|P35282|RAB21_MOUSE Ras-related protein Rab-21 OS=Mus musculus GN=Rab21 PE=1 SV=4	1	1	1	1	1	1	1	1	1	1	5.9	5.9	5.9	24.106	222	222	0	13.885	By MS/MS	By MS/MS	5.9	5.9	177600	101070	76528	48448	0	3	2	5	151	7	TRUE	7	35;36;37;38;39	28;29;30;31;32	29			1	0
sp|P18608|HMGN1_MOUSE	sp|P18608|HMGN1_MOUSE	2	2	2	>sp|P70399|TP53B_MOUSE Tumor suppressor p53-binding protein 1 OS=Mus musculus GN=Tp53bp1 PE=1 SV=2	1	1	1	1	1	0	1	0	1	0	0.8	0.8	0.8	211.34	1957	1957	0.0042194	6.4661	By MS/MS	By matching	0.8	0	42188	42188	0	49534	0	1	0	1	276	249	TRUE	250	1863	1260	1260			1	0
sp|P18760|COF1_MOUSE;sp|P45591|COF2_MOUSE	sp|P18760|COF1_MOUSE	5;1	5;1	5;1	>sp|P11440|CDK1_MOUSE Cyclin-dependent kinase 1 OS=Mus musculus GN=Cdk1 PE=1 SV=3	1	2	2	2	2	1	2	1	2	1	9.4	9.4	9.4	34.106	297	297	0	14.904	By MS/MS	By matching	9.4	4	195410	167820	27595	52011	0	4	0	4	99	384;1380	True;True	387;1394	2838;2839;10970;10971;10972	1852;1853;6189;6190	1853;6190			1	0
sp|P19096|FAS_MOUSE	sp|P19096|FAS_MOUSE	8	8	8	>sp|Q8CG47|SMC4_MOUSE Structural maintenance of chromosomes protein 4 OS=Mus musculus GN=Smc4 PE=1 SV=1	1	1	1	1	1	0	1	0	1	0	1	1	1	146.89	1286	1286	0.0041754	6.4394	By MS/MS	By matching	1	0	49053	49053	0	52350	0	1	0	1	446	406	TRUE	409	2969;2970	1915	1915			1	0
sp|P19253|RL13A_MOUSE	sp|P19253|RL13A_MOUSE	2	2	2	>sp|P14824|ANXA6_MOUSE Annexin A6 OS=Mus musculus GN=Anxa6 PE=1 SV=3	1	1	1	1	1	0	1	0	1	0	1.6	1.6	1.6	75.884	673	673	0	6.9002	By MS/MS	By matching	1.6	0	64973	64973	0	53451	0	1	0	1	110	343	TRUE	345	2563;2564;2565	1688	1688			1	0
sp|P19324|SERPH_MOUSE	sp|P19324|SERPH_MOUSE	3	3	3	>sp|Q9WU78|PDC6I_MOUSE Programmed cell death 6-interacting protein OS=Mus musculus GN=Pdcd6ip PE=1 SV=3	1	1	1	1	1	0	1	0	1	0	1.5	1.5	1.5	96.023	869	869	0.00611	6.3964	By MS/MS	By matching	1.5	0	49609	49609	0	53886	0	3	0	3	588	1129	TRUE	1138	9288;9289	5406;5407;5408	5407			1	0
sp|P20029|GRP78_MOUSE	sp|P20029|GRP78_MOUSE	10	8	8	>sp|P16460|ASSY_MOUSE Argininosuccinate synthase OS=Mus musculus GN=Ass1 PE=1 SV=1	1	1	1	1	1	0	1	0	1	0	3.2	3.2	3.2	46.584	412	412	0.0060852	6.3796	By MS/MS	By matching	3.2	0	46043	46043	0	54358	0	2	0	2	114	563	TRUE	570	4140;4141	2505;2506	2506			1	0
sp|P20152|VIME_MOUSE;sp|P31001|DESM_MOUSE;sp|P15331|PERI_MOUSE	sp|P20152|VIME_MOUSE	20;3;3	19;3;3	17;1;2	>sp|Q3THK3|T2FA_MOUSE General transcription factor IIF subunit 1 OS=Mus musculus GN=Gtf2f1 PE=1 SV=2	1	1	1	1	1	1	1	1	1	1	3.1	3.1	3.1	57.241	508	508	0.002193	6.6223	By MS/MS	By MS/MS	3.1	3.1	71811	54075	17736	59162	0	1	1	2	314	28	TRUE	28	155;156;157;158	98;99	99			1	0
sp|Q8CGP6|H2A1H_MOUSE;sp|Q8R1M2|H2AJ_MOUSE;sp|Q8CGP7|H2A1K_MOUSE;sp|Q8CGP5|H2A1F_MOUSE;sp|Q8BFU2|H2A3_MOUSE;sp|P22752|H2A1_MOUSE;sp|P27661|H2AX_MOUSE;sp|Q64522|H2A2B_MOUSE	sp|Q8CGP6|H2A1H_MOUSE;sp|Q8R1M2|H2AJ_MOUSE;sp|Q8CGP7|H2A1K_MOUSE;sp|Q8CGP5|H2A1F_MOUSE;sp|Q8BFU2|H2A3_MOUSE;sp|P22752|H2A1_MOUSE	5;5;5;5;5;5;2;1	5;5;5;5;5;5;2;1	1;1;1;1;1;1;0;0	>sp|P70372|ELAV1_MOUSE ELAV-like protein 1 OS=Mus musculus GN=Elavl1 PE=1 SV=2	1	1	1	1	1	0	1	0	1	0	4	4	4	36.169	326	326	0	7.1562	By MS/MS	By matching	4	0	128490	128490	0	59568	0	2	0	2	275	1589	TRUE	1617	13152;13153;13154;13155	7632;7633	7633			1	0
sp|P23116|EIF3A_MOUSE	sp|P23116|EIF3A_MOUSE	3	3	3	>sp|P35922|FMR1_MOUSE Fragile X mental retardation protein 1 homolog OS=Mus musculus GN=Fmr1 PE=1 SV=1	1	1	1	1	1	1	1	1	1	1	2.4	2.4	2.4	68.988	614	614	0	7.1482	By MS/MS	By matching	2.4	2.4	79284	54909	24375	61427	0	4	0	4	156	1710	TRUE	1739	14075;14076;14077;14078;14079;14080	8157;8158;8159;8160	8158			1	0
sp|P23198|CBX3_MOUSE;sp|P83917|CBX1_MOUSE	sp|P23198|CBX3_MOUSE	5;1	5;1	5;1	>sp|Q8BJW6|EIF2A_MOUSE Eukaryotic translation initiation factor 2A OS=Mus musculus GN=Eif2a PE=2 SV=2	1	1	1	1	1	1	1	1	1	1	2.4	2.4	2.4	64.403	581	581	0.0078125	6.2503	By MS/MS	By matching	2.4	2.4	77993	63131	14862	62781	0	1	0	1	419	1493	TRUE	1508	11804;11805;11806	6616	6616			1	0
sp|P24369|PPIB_MOUSE	sp|P24369|PPIB_MOUSE	1	1	1	>sp|O70503|DHB12_MOUSE Very-long-chain 3-oxoacyl-CoA reductase OS=Mus musculus GN=Hsd17b12 PE=2 SV=1	1	1	1	1	1	1	1	1	1	1	5.1	5.1	5.1	34.741	312	312	0.0042827	6.5401	By matching	By MS/MS	5.1	5.1	178260	83211	95051	63223	0	0	1	1	65	1095	TRUE	1104	9046;9047;9048;9049;9050;9051;9052	5300	5300			1	0
sp|P24452|CAPG_MOUSE	sp|P24452|CAPG_MOUSE	1	1	1	>sp|P63001|RAC1_MOUSE Ras-related C3 botulinum toxin substrate 1 OS=Mus musculus GN=Rac1 PE=1 SV=1;>sp|Q05144|RAC2_MOUSE Ras-related C3 botulinum toxin substrate 2 OS=Mus musculus GN=Rac2 PE=2 SV=1;>sp|P60764|RAC3_MOUSE Ras-related C3 botulinum toxin subst	3	2	2	2	2	0	2	0	2	0	13	13	13	21.45	192	192;192;192	0	12.556	By MS/MS	By matching	13	0	147990	147990	0	63986	0	3	0	3	256	995;2079	True;True	1003;2115	7529;16958;16959	4409;9823;9824	4409;9823	180	145	1	0
sp|P25206|MCM3_MOUSE	sp|P25206|MCM3_MOUSE	4	4	4	>sp|P24369|PPIB_MOUSE Peptidyl-prolyl cis-trans isomerase B OS=Mus musculus GN=Ppib PE=1 SV=2	1	1	1	1	1	1	1	1	1	1	6	6	6	23.713	216	216	0	7.5075	By MS/MS	By matching	6	6	252160	147940	104220	71542	0	2	0	2	132	1837	TRUE	1870	15092;15093;15094;15095;15096	8737;8738	8737			1	0
sp|P25444|RS2_MOUSE	sp|P25444|RS2_MOUSE	4	4	4	>sp|Q8VE37|RCC1_MOUSE Regulator of chromosome condensation OS=Mus musculus GN=Rcc1 PE=1 SV=1	1	1	1	1	1	0	1	0	1	0	3.6	3.6	3.6	44.93	421	421	0	6.7127	By MS/MS	By matching	3.6	0	67853	67853	0	72291	0	2	0	2	466	1614	TRUE	1642	13330;13331	7727;7728	7727	312	163	1	0
sp|P25976|UBF1_MOUSE	sp|P25976|UBF1_MOUSE	1	1	1	>sp|Q62188|DPYL3_MOUSE Dihydropyrimidinase-related protein 3 OS=Mus musculus GN=Dpysl3 PE=1 SV=1	2	3	3	2	3	1	3	1	2	1	7.9	7.9	5.1	61.936	570	570;572	0	19.818	By MS/MS	By MS/MS	7.9	2.8	67373	67373	0	72906	0	4	1	5	366	142;703;1278	True;True;True	143;710;1289	900;901;902;5059;5060;10281	573;574;575;3039;5835	575;3039;5835	39;239	83;375	1	0
sp|P26039|TLN1_MOUSE;sp|Q71LX4|TLN2_MOUSE	sp|P26039|TLN1_MOUSE	12;2	12;2	12;2	>sp|Q60692|PSB6_MOUSE Proteasome subunit beta type-6 OS=Mus musculus GN=Psmb6 PE=1 SV=3	1	2	2	2	2	1	2	1	2	1	8.4	8.4	8.4	25.378	238	238	0	12.227	By MS/MS	By MS/MS	8.4	4.6	315930	168920	147000	72995	0	1	1	2	336	601;1034	True;True	608;1042	4412;7925;7926;7927;7928	2668;4587;4588;4589	2668;4587			1	0
sp|P26040|EZRI_MOUSE	sp|P26040|EZRI_MOUSE	3	2	2	>sp|Q8K1N4|SPAS2_MOUSE Spermatogenesis-associated serine-rich protein 2 OS=Mus musculus GN=Spats2 PE=1 SV=1	1	1	1	1	1	0	1	0	1	0	2.6	2.6	2.6	58.955	545	545	0	6.727	By MS/MS	By matching	2.6	0	68326	68326	0	76191	0	2	0	2	455	1481	TRUE	1496	11738;11739;11740	6583;6584	6584			1	0
sp|P26041|MOES_MOUSE;sp|P26043|RADI_MOUSE	sp|P26041|MOES_MOUSE	11;2	11;2	10;1	>sp|Q6NZJ6|IF4G1_MOUSE Eukaryotic translation initiation factor 4 gamma 1 OS=Mus musculus GN=Eif4g1 PE=1 SV=1	1	2	2	2	1	2	1	2	1	2	2	2	2	176.07	1600	1600	0	12.834	By MS/MS	By MS/MS	1	2	96221	72952	23270	78797	0	2	3	5	384	446;1026	True;True	450;1034	3253;3254;3255;7845	2058;2059;2060;2061;4570	2059;4570			1	0
sp|P26443|DHE3_MOUSE	sp|P26443|DHE3_MOUSE	1	1	1	>sp|F6ZDS4|TPR_MOUSE Nucleoprotein TPR OS=Mus musculus GN=Tpr PE=1 SV=1	1	2	2	2	2	1	2	1	2	1	0.9	0.9	0.9	273.99	2431	2431	0	12.11	By MS/MS	By matching	0.9	0.5	88480	73352	15129	80471	0	2	0	2	38	271;1366	True;True	273;1380	2047;2048;2049;10829;10830	1365;6142	1365;6142			1	0
sp|P26883|FKB1A_MOUSE	sp|P26883|FKB1A_MOUSE	1	1	1	>sp|Q6ZQ88|KDM1A_MOUSE Lysine-specific histone demethylase 1A OS=Mus musculus GN=Kdm1a PE=1 SV=2	1	1	1	1	1	0	1	0	1	0	1.8	1.8	1.8	92.849	853	853	0	12.087	By MS/MS	By matching	1.8	0	79233	79233	0	84351	0	2	0	2	391	1934	TRUE	1968	15928;15929	9234;9235	9235			1	0
sp|P27046|MA2A1_MOUSE	sp|P27046|MA2A1_MOUSE	2	2	2	>sp|Q9CW03|SMC3_MOUSE Structural maintenance of chromosomes protein 3 OS=Mus musculus GN=Smc3 PE=1 SV=2	1	2	2	2	2	1	2	1	2	1	1.6	1.6	1.6	141.55	1217	1217	0	11.719	By MS/MS	By matching	1.6	0.7	125050	81354	43693	88726	0	2	0	2	519	443;1052	True;True	447;1060	3232;3233;8059;8060;8061;8062	2055;4669	2055;4669			1	0
sp|P27659|RL3_MOUSE	sp|P27659|RL3_MOUSE	2	2	2	>sp|Q8BFY9|TNPO1_MOUSE Transportin-1 OS=Mus musculus GN=Tnpo1 PE=1 SV=2	2	3	3	3	2	2	2	2	2	2	4.5	4.5	4.5	102.36	898	898;887	0	21.674	By MS/MS	By MS/MS	2.8	3	155890	85419	70466	93354	0	3	3	6	412	298;1507;1788	True;True;True	300;1525;1820	2242;11995;14646;14647;14648;14649;14650	1490;6778;8487;8488;8489;8490	1490;6778;8487			1	0
sp|P27773|PDIA3_MOUSE	sp|P27773|PDIA3_MOUSE	4	4	4	>sp|O70126|AURKB_MOUSE Aurora kinase B OS=Mus musculus GN=Aurkb PE=1 SV=2	1	1	1	1	1	0	1	0	1	0	3.5	3.5	3.5	39.384	345	345	0	6.8555	By MS/MS	By matching	3.5	0	89154	89154	0	95597	0	1	0	1	58	1823	TRUE	1856	14997;14998	8704	8704			1	0
sp|P28658|ATX10_MOUSE	sp|P28658|ATX10_MOUSE	1	1	1	>sp|Q60953|PML_MOUSE Protein PML OS=Mus musculus GN=Pml PE=1 SV=3	1	2	2	2	2	0	2	0	2	0	2.7	2.7	2.7	98.241	885	885	0	13.41	By MS/MS	By matching	2.7	0	88031	88031	0	97753	0	3	0	3	343	541;1292	True;True	548;1304	3993;3994;10363	2422;2423;5879	2422;5879	233	1	1	0
sp|P29341|PABP1_MOUSE	sp|P29341|PABP1_MOUSE	6	6	6	>sp|Q7TNC4|LC7L2_MOUSE Putative RNA-binding protein Luc7-like 2 OS=Mus musculus GN=Luc7l2 PE=1 SV=1	1	2	2	2	2	1	2	1	2	1	7.7	7.7	7.7	46.582	392	392	0	12.964	By MS/MS	By MS/MS	7.7	3.8	164260	89029	75232	97916	0	4	1	5	401	1042;1901	True;True	1050;1935	7974;7975;7976;7977;15674;15675	4626;4627;4628;9109;9110	4627;9109			1	0
sp|P30681|HMGB2_MOUSE	sp|P30681|HMGB2_MOUSE	2	2	2	>sp|P97447|FHL1_MOUSE Four and a half LIM domains protein 1 OS=Mus musculus GN=Fhl1 PE=1 SV=3	1	1	1	1	1	0	1	0	1	0	4.3	4.3	4.3	31.888	280	280	0	7.2336	By MS/MS	By matching	4.3	0	155580	155580	0	98219	0	3	0	3	292	143	TRUE	144	903;904;905	576;577;578	577			1	0
sp|P31230|AIMP1_MOUSE	sp|P31230|AIMP1_MOUSE	2	2	2	>sp|Q06185|ATP5I_MOUSE ATP synthase subunit e, mitochondrial OS=Mus musculus GN=Atp5i PE=1 SV=2	1	2	2	2	2	0	2	0	2	0	35.2	35.2	35.2	8.2355	71	71	0	11.899	By MS/MS	By matching	35.2	0	234360	234360	0	100500	0	2	0	2	310	472;2091	True;True	477;2127	3478;3479;17019	2166;9848	2166;9848	218	23	1	0
sp|P31266|SUH_MOUSE	sp|P31266|SUH_MOUSE	1	1	1	>sp|Q61792|LASP1_MOUSE LIM and SH3 domain protein 1 OS=Mus musculus GN=Lasp1 PE=1 SV=1	1	1	1	1	1	1	1	1	1	1	4.9	4.9	4.9	29.994	263	263	0	13.422	By MS/MS	By matching	4.9	4.9	200330	158740	41586	102300	0	2	0	2	359	662	TRUE	669	4784;4785;4786;4787;4788;4789;4790	2880;2881	2881			1	0
sp|P34022|RANG_MOUSE	sp|P34022|RANG_MOUSE	1	1	1	>sp|Q8VEM8|MPCP_MOUSE Phosphate carrier protein, mitochondrial OS=Mus musculus GN=Slc25a3 PE=1 SV=1	1	1	1	1	1	0	1	0	1	0	3.4	3.4	3.4	39.632	357	357	0	7.246	By MS/MS	By matching	3.4	0	103650	103650	0	103650	0	3	0	3	469	893	TRUE	901	6596;6597;6598	3858;3859;3860	3860			1	0
sp|P35282|RAB21_MOUSE	sp|P35282|RAB21_MOUSE	1	1	1	>sp|Q9QUM9|PSA6_MOUSE Proteasome subunit alpha type-6 OS=Mus musculus GN=Psma6 PE=1 SV=1	1	1	1	1	1	1	1	1	1	1	5.3	5.3	5.3	27.372	246	246	0	7.1811	By MS/MS	By MS/MS	5.3	5.3	341650	187700	153950	105950	0	2	1	3	576	135	TRUE	136	867;868;869;870;871;872	554;555;556	556			1	0
sp|P35293|RAB18_MOUSE	sp|P35293|RAB18_MOUSE	2	2	2	>sp|Q99JF8|PSIP1_MOUSE PC4 and SFRS1-interacting protein OS=Mus musculus GN=Psip1 PE=1 SV=1	1	2	2	2	2	0	2	0	2	0	3.2	3.2	3.2	59.696	528	528	0	11.341	By MS/MS	By matching	3.2	0	103760	103760	0	106630	0	3	0	3	497	598;815	True;True	605;822	4385;4386;4387;5992	2652;2653;3525	2652;3525			1	0
sp|P35441|TSP1_MOUSE;CON__Q28194	sp|P35441|TSP1_MOUSE	5;2	5;2	5;2	>sp|Q99MN9|PCCB_MOUSE Propionyl-CoA carboxylase beta chain, mitochondrial OS=Mus musculus GN=Pccb PE=1 SV=2	1	1	1	1	1	1	1	1	1	1	3	3	3	58.408	541	541	0	24.877	By MS/MS	By MS/MS	3	3	97510	97510	0	106780	0	6	1	7	503	1697	TRUE	1726	13958;13959;13960;13961;13962	8086;8087;8088;8089;8090;8091;8092	8092			1	0
sp|P35486|ODPA_MOUSE	sp|P35486|ODPA_MOUSE	2	2	2	>sp|E9Q557|DESP_MOUSE Desmoplakin OS=Mus musculus GN=Dsp PE=1 SV=1	1	2	2	2	1	2	1	2	1	2	1	1	1	332.91	2883	2883	0	12.225	By MS/MS	By MS/MS	0.5	1	216050	135310	80743	106990	0	1	2	3	37	912;1133	True;True	920;1142	6740;9306;9307;9308;9309;9310	3945;5421;5422	3945;5421			1	0
sp|P35700|PRDX1_MOUSE	sp|P35700|PRDX1_MOUSE	4	4	4	>sp|Q9QY76|VAPB_MOUSE Vesicle-associated membrane protein-associated protein B OS=Mus musculus GN=Vapb PE=2 SV=3;>sp|Q9WV55|VAPA_MOUSE Vesicle-associated membrane protein-associated protein A OS=Mus musculus GN=Vapa PE=1 SV=2	2	2	2	2	2	1	2	1	2	1	10.7	10.7	10.7	26.946	243	243;249	0	11.792	By MS/MS	By matching	10.7	4.9	243570	231530	12038	111790	0	2	0	2	581	711;1902	True;True	718;1936	5113;5114;5115;5116;15676;15677	3059;9111;9112	3059;9111			1	0
sp|P35922|FMR1_MOUSE	sp|P35922|FMR1_MOUSE	1	1	1	>sp|O70400|PDLI1_MOUSE PDZ and LIM domain protein 1 OS=Mus musculus GN=Pdlim1 PE=2 SV=4	1	2	2	2	2	1	2	1	2	1	7.6	7.6	7.6	35.774	327	327	0	11.797	By MS/MS	By MS/MS	7.6	4.6	269770	168660	101110	118070	0	1	0	1	64	1245;1858	True;True	1256;1892	10055;10056;10057;10058;10059;15272;15273;15274;15275;15276	5752;8831	5752;8831			1	0
sp|P35979|RL12_MOUSE	sp|P35979|RL12_MOUSE	2	2	2	>sp|P26883|FKB1A_MOUSE Peptidyl-prolyl cis-trans isomerase FKBP1A OS=Mus musculus GN=Fkbp1a PE=1 SV=2	1	1	1	1	1	1	1	1	1	1	12	12	12	11.922	108	108	0	33.996	By MS/MS	By MS/MS	12	12	275670	275670	0	118080	0	3	2	5	141	776	TRUE	783	5661;5662;5663;5664	3363;3364;3365;3366;3367	3366			1	0
sp|P35980|RL18_MOUSE	sp|P35980|RL18_MOUSE	3	3	3	>sp|Q8BG32|PSD11_MOUSE 26S proteasome non-ATPase regulatory subunit 11 OS=Mus musculus GN=Psmd11 PE=1 SV=3	1	2	2	2	2	1	2	1	2	1	5.2	5.2	5.2	47.436	422	422	0	12.234	By MS/MS	By MS/MS	5.2	2.4	190730	118610	72117	125000	0	4	2	6	414	4;1760	True;True	4;1791	23;24;25;26;27;14417	18;19;20;21;22;8360	21;8360			1	0
sp|P37804|TAGL_MOUSE	sp|P37804|TAGL_MOUSE	3	3	3	>sp|Q6ZWV3|RL10_MOUSE 60S ribosomal protein L10 OS=Mus musculus GN=Rpl10 PE=1 SV=3	1	2	2	2	2	1	2	1	2	1	6.5	6.5	6.5	24.604	214	214	0	11.515	By MS/MS	By MS/MS	6.5	6.5	464060	297900	166160	128840	0	1	1	2	394	584;585	True;True	591;592	4310;4311;4312;4313;4314	2605;2606;2607	2605;2607	258	184	1	0
sp|P38647|GRP75_MOUSE	sp|P38647|GRP75_MOUSE	8	8	8	>sp|Q9CZX8|RS19_MOUSE 40S ribosomal protein S19 OS=Mus musculus GN=Rps19 PE=1 SV=3	1	2	2	2	2	2	2	2	2	2	13.1	13.1	13.1	16.085	145	145	0	123.06	By MS/MS	By MS/MS	13.1	13.1	298430	275180	23246	136430	0	4	1	5	531	418;805	True;True	421;812	3061;3062;3063;5900;5901;5902;5903;5904;5905	1972;1973;1974;3477;3478	1972;3478			1	0
sp|P40124|CAP1_MOUSE	sp|P40124|CAP1_MOUSE	3	3	3	>sp|Q9D0R2|SYTC_MOUSE Threonine--tRNA ligase, cytoplasmic OS=Mus musculus GN=Tars PE=1 SV=2	1	2	2	2	2	1	2	1	2	1	3.6	3.6	3.6	83.355	722	722	0	12.351	By MS/MS	By matching	3.6	1.7	155610	123680	31925	137740	0	3	0	3	535	656;1357	True;True	663;1371	4757;10752;10753;10754;10755	2859;6097;6098	2859;6097			1	0
sp|P40142|TKT_MOUSE	sp|P40142|TKT_MOUSE	4	4	4	>sp|O35682|MYADM_MOUSE Myeloid-associated differentiation marker OS=Mus musculus GN=Myadm PE=2 SV=2	1	1	1	1	1	1	1	1	1	1	5.3	5.3	5.3	35.284	320	320	0.0041322	6.4273	By MS/MS	By MS/MS	5.3	5.3	291480	139000	152480	139390	0	2	2	4	52	1831	TRUE	1864	15040;15041;15042;15043;15044	8715;8716;8717;8718	8718			1	0
sp|P41105|RL28_MOUSE	sp|P41105|RL28_MOUSE	1	1	1	>sp|O70194|EIF3D_MOUSE Eukaryotic translation initiation factor 3 subunit D OS=Mus musculus GN=Eif3d PE=1 SV=2	1	2	2	2	2	1	2	1	2	1	4	4	4	63.988	548	548	0	11.946	By MS/MS	By matching	4	2.2	153970	134720	19253	148580	0	2	0	2	60	1090;1392	True;True	1099;1406	8329;8330;8331;11022;11023;11024	4785;6227	4785;6227	53	114	1	0
sp|P42208|SEPT2_MOUSE	sp|P42208|SEPT2_MOUSE	3	3	3	>sp|Q8CI51|PDLI5_MOUSE PDZ and LIM domain protein 5 OS=Mus musculus GN=Pdlim5 PE=1 SV=4	1	1	1	1	1	1	1	1	1	1	1.5	1.5	1.5	63.299	591	591	0	6.8587	By MS/MS	By MS/MS	1.5	1.5	286720	152640	134090	149290	0	2	1	3	450	710	TRUE	717	5103;5104;5105;5106;5107;5108;5109;5110;5111;5112	3056;3057;3058	3056			1	0
sp|P42932|TCPQ_MOUSE	sp|P42932|TCPQ_MOUSE	5	5	5	>sp|Q60865|CAPR1_MOUSE Caprin-1 OS=Mus musculus GN=Caprin1 PE=1 SV=2	1	2	2	2	2	1	2	1	2	1	3.3	3.3	3.3	78.168	707	707	0	15.276	By MS/MS	By matching	3.3	1.7	178510	142850	35655	149350	0	5	0	5	340	1172;2090	True;True	1182;2126	9556;9557;17014;17015;17016;17017;17018	5522;5523;9845;9846;9847	5523;9845			1	0
sp|P43274|H14_MOUSE	sp|P43274|H14_MOUSE	30	9	9	>sp|Q9CX34|SGT1_MOUSE Protein SGT1 homolog OS=Mus musculus GN=Sugt1 PE=2 SV=3	1	2	2	2	2	1	2	1	2	1	7.7	7.7	7.7	38.158	336	336	0	11.9	By MS/MS	By MS/MS	7.7	3.6	228430	138260	90165	149890	0	2	1	3	521	2;1585	True;True	2;1613	12;13;14;15;16;17;13131	14;15;7621	15;7621			1	0
sp|P43275|H11_MOUSE	sp|P43275|H11_MOUSE	16	11	11	>sp|Q8BKC5|IPO5_MOUSE Importin-5 OS=Mus musculus GN=Ipo5 PE=1 SV=3	1	1	1	1	1	1	1	1	1	1	1	1	1	123.59	1097	1097	0.0095602	6.1895	By MS/MS	By MS/MS	1	1	206460	141460	65001	150560	0	2	2	4	420	1604	TRUE	1632	13231;13232;13233;13234;13235	7690;7691;7692;7693	7691			1	0
sp|P43276|H15_MOUSE	sp|P43276|H15_MOUSE	31	21	21	>sp|Q61696|HS71A_MOUSE Heat shock 70 kDa protein 1A OS=Mus musculus GN=Hspa1a PE=1 SV=2;>sp|P17879|HS71B_MOUSE Heat shock 70 kDa protein 1B OS=Mus musculus GN=Hspa1b PE=1 SV=3	2	5	2	1	5	4	2	1	1	0	9.4	4.2	2.3	70.078	641	641;642	0.006135	6.4005	By MS/MS	By MS/MS	9.4	7	204430	138490	65940	151570	0	2	2	4	121	350;910;1398;1834;1900	True;False;True;False;False	352;918;1412;1867;1934	2607;2608;2609;2610;2611;6723;6724;6725;6726;6727;6728;6729;6730;11058;15060;15061;15062;15063;15064;15065;15066;15067;15068;15069;15070;15071;15072;15073;15663;15664;15665;15666;15667;15668;15669;15670;15671;15672;15673	1713;1714;1715;3940;3941;3942;3943;6244;8730;9099;9100;9101;9102;9103;9104;9105;9106;9107;9108	1715;3943;6244;8730;9108			1	0
sp|P43277|H13_MOUSE	sp|P43277|H13_MOUSE	31	31	6	>sp|Q60932|VDAC1_MOUSE Voltage-dependent anion-selective channel protein 1 OS=Mus musculus GN=Vdac1 PE=1 SV=3	1	2	2	2	2	1	2	1	2	1	7.1	7.1	7.1	32.351	296	296	0	14.75	By MS/MS	By matching	7.1	3.4	400530	357700	42832	153050	0	4	0	4	342	1235;2032	True;True	1245;2067	9989;9990;9991;9992;9993;9994;9995;9996;16604;16605;16606;16607	5718;5719;9615;9616	5719;9616			1	0
sp|P47738|ALDH2_MOUSE	sp|P47738|ALDH2_MOUSE	3	3	3	>sp|Q9Z2U0|PSA7_MOUSE Proteasome subunit alpha type-7 OS=Mus musculus GN=Psma7 PE=1 SV=1;>sp|Q9CWH6|PSA7L_MOUSE Proteasome subunit alpha type-7-like OS=Mus musculus GN=Psma8 PE=2 SV=1	2	3	3	3	3	1	3	1	3	1	16.1	16.1	16.1	27.855	248	248;250	0	19.163	By MS/MS	By matching	16.1	5.6	369590	353250	16339	153580	0	3	0	3	600	188;1240;1426	True;True;True	189;1251;1441	1428;1429;10029;10030;10031;11267	947;5730;6377	947;5730;6377			1	0
sp|P47754|CAZA2_MOUSE;sp|P47753|CAZA1_MOUSE	sp|P47754|CAZA2_MOUSE;sp|P47753|CAZA1_MOUSE	2;1	2;1	2;1	>sp|P68254|1433T_MOUSE 14-3-3 protein theta OS=Mus musculus GN=Ywhaq PE=1 SV=1	1	1	1	1	1	1	1	1	1	1	5.7	5.7	5.7	27.778	245	245	0	7.5604	By MS/MS	By MS/MS	5.7	5.7	289090	253080	36013	155760	0	4	2	6	268	320	TRUE	322	2415;2416;2417;2418;2419;2420;2421;2422	1589;1590;1591;1592;1593;1594	1591			1	0
sp|P47758|SRPRB_MOUSE	sp|P47758|SRPRB_MOUSE	3	3	3	>sp|Q9Z2X1|HNRPF_MOUSE Heterogeneous nuclear ribonucleoprotein F OS=Mus musculus GN=Hnrnpf PE=1 SV=3	1	1	1	1	1	1	1	1	1	1	3.1	3.1	3.1	45.729	415	415	0	7.6913	By MS/MS	By MS/MS	3.1	3.1	282090	163620	118470	165500	0	5	4	9	601	1305	TRUE	1318	10447;10448;10449;10450;10451;10452;10453;10454;10455;10456;10457	5914;5915;5916;5917;5918;5919;5920;5921;5922	5916	376	2	1	0
sp|P47911|RL6_MOUSE	sp|P47911|RL6_MOUSE	3	3	3	>sp|Q60972|RBBP4_MOUSE Histone-binding protein RBBP4 OS=Mus musculus GN=Rbbp4 PE=1 SV=5	1	1	1	1	1	0	1	0	1	0	3.3	3.3	3.3	47.655	425	425	0	8.7241	By MS/MS	By matching	3.3	0	155790	155790	0	168870	0	2	0	2	344	56	TRUE	56	324;325	202;203	202			1	0
sp|P47915|RL29_MOUSE	sp|P47915|RL29_MOUSE	1	1	1	>sp|P49718|MCM5_MOUSE DNA replication licensing factor MCM5 OS=Mus musculus GN=Mcm5 PE=2 SV=1	1	1	1	1	1	1	1	1	1	1	1.8	1.8	1.8	82.342	733	733	0.0077369	6.2303	By MS/MS	By matching	1.8	1.8	174770	156870	17901	169730	0	2	0	2	185	1961	TRUE	1995	16085;16086;16087	9320;9321	9320			1	0
sp|P47963|RL13_MOUSE	sp|P47963|RL13_MOUSE	10	10	10	>sp|Q7TMK9|HNRPQ_MOUSE Heterogeneous nuclear ribonucleoprotein Q OS=Mus musculus GN=Syncrip PE=1 SV=2	1	1	1	1	1	1	1	1	1	1	1.9	1.9	1.9	69.632	623	623	0	7.0463	By MS/MS	By MS/MS	1.9	1.9	231360	161930	69435	175610	0	4	4	8	400	1768	TRUE	1800	14454;14455;14456;14457;14458;14459;14460;14461;14462	8385;8386;8387;8388;8389;8390;8391;8392	8390			1	0
sp|P48036|ANXA5_MOUSE	sp|P48036|ANXA5_MOUSE	2	2	2	>sp|Q91VM5|RMXL1_MOUSE RNA binding motif protein, X-linked-like-1 OS=Mus musculus GN=Rbmxl1 PE=2 SV=1;>sp|Q9WV02|RBMX_MOUSE RNA-binding motif protein, X chromosome OS=Mus musculus GN=Rbmx PE=1 SV=1	2	1	1	1	1	1	1	1	1	1	3.4	3.4	3.4	42.161	388	388;391	0.007767	6.2356	By MS/MS	By MS/MS	3.4	3.4	275430	174500	100930	176580	0	2	2	4	479	1082	TRUE	1091	8300;8301;8302;8303;8304;8305;8306;8307;8308	4769;4770;4771;4772	4770			1	0
sp|P48678|LMNA_MOUSE	sp|P48678|LMNA_MOUSE	23	23	23	>sp|Q9CWJ9|PUR9_MOUSE Bifunctional purine biosynthesis protein PURH OS=Mus musculus GN=Atic PE=1 SV=2	1	2	2	2	2	2	2	2	2	2	5.4	5.4	5.4	64.217	592	592	0	11.109	By MS/MS	By matching	5.4	5.4	268730	160380	108350	177100	0	1	0	1	520	419;542	True;True	422;549	3064;3065;3066;3067;3995;3996;3997;3998;3999;4000;4001	1975;2424	1975;2424	338	60	1	0
sp|P49312|ROA1_MOUSE	sp|P49312|ROA1_MOUSE	2	2	2	>sp|Q08943|SSRP1_MOUSE FACT complex subunit SSRP1 OS=Mus musculus GN=Ssrp1 PE=1 SV=2	1	3	3	3	2	3	2	3	2	3	4.9	4.9	4.9	80.859	708	708	0	31.758	By MS/MS	By MS/MS	3.4	4.9	188890	166600	22282	184060	0	5	2	7	311	65;269;1530	True;True;True	65;271;1557	380;381;382;2036;12572;12573;12574;12575;12576	241;242;243;244;1358;7290;7291	241;1358;7291			1	0
sp|P49717|MCM4_MOUSE	sp|P49717|MCM4_MOUSE	1	1	1	>sp|Q9D3R6|KATL2_MOUSE Katanin p60 ATPase-containing subunit A-like 2 OS=Mus musculus GN=Katnal2 PE=2 SV=2;>sp|Q3UMC0|SPAT5_MOUSE Spermatogenesis-associated protein 5 OS=Mus musculus GN=Spata5 PE=1 SV=2	2	1	1	1	1	1	1	1	1	1	2.2	2.2	2.2	61.152	539	539;893	0	8.0623	By matching	By MS/MS	2.2	2.2	273510	174030	99480	192390	0	0	0	0	322	697	TRUE	704	5029;5030;5031;5032;5033	3021	3021			1	0
sp|P49718|MCM5_MOUSE	sp|P49718|MCM5_MOUSE	1	1	1	>sp|P52293|IMA1_MOUSE Importin subunit alpha-1 OS=Mus musculus GN=Kpna2 PE=1 SV=2	1	3	3	3	3	3	3	3	3	3	7.9	7.9	7.9	57.927	529	529	0	24.242	By MS/MS	By MS/MS	7.9	7.9	445200	172370	272830	193460	0	3	4	7	192	131;1144;1678	True;True;True	132;1153;1707	840;841;842;843;844;9387;9388;13810;13811;13812	541;542;543;544;545;5461;7993;7994	545;5461;7993			1	0
sp|P50247|SAHH_MOUSE	sp|P50247|SAHH_MOUSE	3	3	3	>sp|P61255|RL26_MOUSE 60S ribosomal protein L26 OS=Mus musculus GN=Rpl26 PE=1 SV=1	1	2	2	2	2	2	2	2	2	2	11.7	11.7	11.7	17.258	145	145	0	12.21	By MS/MS	By MS/MS	11.7	11.7	438110	409230	28881	195370	0	2	1	3	218	361;588	True;True	364;595	2709;2710;2711;4324;4325;4326	1797;1798;2611	1798;2611			1	0
sp|P50405|PSPB_MOUSE	sp|P50405|PSPB_MOUSE	1	1	1	>sp|P63085|MK01_MOUSE Mitogen-activated protein kinase 1 OS=Mus musculus GN=Mapk1 PE=1 SV=3	1	1	1	1	1	1	1	1	1	1	3.4	3.4	3.4	41.275	358	358	0	6.8997	By MS/MS	By MS/MS	3.4	3.4	276130	189920	86213	201040	0	4	3	7	259	1	TRUE	1	6;7;8;9;10;11	7;8;9;10;11;12;13	7	185	11	1	0
sp|P50580|PA2G4_MOUSE	sp|P50580|PA2G4_MOUSE	3	3	3	>sp|P10639|THIO_MOUSE Thioredoxin OS=Mus musculus GN=Txn PE=1 SV=3	1	2	2	2	2	1	2	1	2	1	21	21	21	11.675	105	105	0	11.965	By MS/MS	By matching	21	8.6	524390	433680	90712	211330	0	3	0	3	94	430;1918	True;True	434;1952	3162;3163;3164;3165;15801;15802;15803;15804	2015;2016;9171	2015;9171			1	0
sp|P51150|RAB7A_MOUSE	sp|P51150|RAB7A_MOUSE	1	1	1	>sp|Q9WU62|INCE_MOUSE Inner centromere protein OS=Mus musculus GN=Incenp PE=1 SV=2	1	2	2	2	2	0	2	0	2	0	3	3	3	101.21	880	880	0	26.675	By MS/MS	By matching	3	0	200870	200870	0	212760	0	3	0	3	587	1041;1592	True;True	1049;1620	7972;7973;13165;13166;13167	4624;4625;7642;7643	4625;7642			1	0
sp|P51410|RL9_MOUSE	sp|P51410|RL9_MOUSE	1	1	1	>sp|Q61656|DDX5_MOUSE Probable ATP-dependent RNA helicase DDX5 OS=Mus musculus GN=Ddx5 PE=1 SV=2	1	6	3	3	5	4	3	1	3	1	10.7	5	5	69.289	614	614	0	18.134	By MS/MS	By MS/MS	9.1	7.2	276470	205890	70573	222890	0	4	1	5	354	212;436;637;1155;1666;1763	False;True;False;True;False;True	213;440;644;1164;1694;1795	1573;1574;1575;1576;1577;1578;1579;1580;3185;3186;3187;3188;3189;3190;4645;4646;4647;4648;4649;4650;4651;4652;9461;13676;14429;14430	1055;1056;1057;1058;1059;1060;2033;2034;2035;2805;2806;2807;2808;2809;2810;5483;7923;8370	1057;2033;2807;5483;7923;8370			1	0
sp|P51881|ADT2_MOUSE	sp|P51881|ADT2_MOUSE	2	2	2	>sp|Q61687|ATRX_MOUSE Transcriptional regulator ATRX OS=Mus musculus GN=Atrx PE=1 SV=3	1	3	3	3	3	0	3	0	3	0	1.8	1.8	1.8	278.58	2476	2476	0	18.224	By MS/MS	By matching	1.8	0	205080	205080	0	223380	0	5	0	5	355	37;114;1109	True;True;True	37;115;1118	216;217;741;742;9137;9138	141;142;480;5334;5335	141;480;5335	235;236	117;367	1	0
sp|P52293|IMA1_MOUSE	sp|P52293|IMA1_MOUSE	3	3	3	>sp|Q9JIF0|ANM1_MOUSE Protein arginine N-methyltransferase 1 OS=Mus musculus GN=Prmt1 PE=1 SV=1	1	1	1	1	1	1	1	1	1	1	3	3	3	42.435	371	371	0	6.7087	By MS/MS	By MS/MS	3	3	334510	231130	103390	245700	0	1	1	2	565	287	TRUE	289	2165;2166;2167;2168;2169;2170;2171;2172	1447;1448	1448			1	0
sp|P52480|KPYM_MOUSE;sp|P53657|KPYR_MOUSE	sp|P52480|KPYM_MOUSE	13;1	13;1	13;1	>sp|Q3THK7|GUAA_MOUSE GMP synthase [glutamine-hydrolyzing] OS=Mus musculus GN=Gmps PE=1 SV=2	1	2	2	2	2	2	2	2	2	2	3.2	3.2	3.2	76.723	693	693	0	11.974	By MS/MS	By matching	3.2	3.2	358070	218760	139310	251250	0	2	0	2	315	482;1791	True;True	487;1823	3537;3538;3539;3540;14671;14672;14673;14674;14675	2208;2209;8499	2209;8499			1	0
sp|P52927|HMGA2_MOUSE	sp|P52927|HMGA2_MOUSE	3	3	3	>sp|Q6ZWV7|RL35_MOUSE 60S ribosomal protein L35 OS=Mus musculus GN=Rpl35 PE=2 SV=1	1	1	1	1	1	1	1	1	1	1	8.1	8.1	8.1	14.552	123	123	0	6.6663	By MS/MS	By MS/MS	8.1	8.1	443740	303230	140510	258340	0	4	1	5	395	1979	TRUE	2013	16224;16225;16226;16227;16228;16229	9375;9376;9377;9378;9379	9379			1	0
sp|P54822|PUR8_MOUSE	sp|P54822|PUR8_MOUSE	2	2	2	>sp|Q9EQU5|SET_MOUSE Protein SET OS=Mus musculus GN=Set PE=1 SV=1	1	1	1	1	1	1	1	1	1	1	3.5	3.5	3.5	33.377	289	289	0.0021739	6.5849	By MS/MS	By matching	3.5	3.5	425460	331280	94178	268680	0	3	0	3	560	1906	TRUE	1940	15706;15707;15708;15709;15710;15711;15712;15713;15714;15715;15716;15717;15718	9126;9127;9128	9128			1	0
sp|P55264|ADK_MOUSE	sp|P55264|ADK_MOUSE	1	1	1	>sp|P70296|PEBP1_MOUSE Phosphatidylethanolamine-binding protein 1 OS=Mus musculus GN=Pebp1 PE=1 SV=3	1	2	2	2	2	1	2	1	2	1	20.9	20.9	20.9	20.83	187	187	0	12.923	By MS/MS	By matching	20.9	7	466520	447460	19057	273390	0	3	0	3	272	705;1896	True;True	712;1930	5073;15652;15653;15654;15655;15656;15657	3041;9094;9095	3041;9094			1	0
sp|P56135|ATPK_MOUSE	sp|P56135|ATPK_MOUSE	1	1	1	>sp|Q9D1R9|RL34_MOUSE 60S ribosomal protein L34 OS=Mus musculus GN=Rpl34 PE=1 SV=2	1	1	1	1	1	1	1	1	1	1	7.7	7.7	7.7	13.293	117	117	0	7.0712	By MS/MS	By MS/MS	7.7	7.7	555860	284710	271150	274110	0	1	1	2	539	1226	TRUE	1236	9954;9955;9956;9957;9958;9959;9960	5704;5705	5705			1	0
sp|P56399|UBP5_MOUSE	sp|P56399|UBP5_MOUSE	2	2	2	>sp|P51410|RL9_MOUSE 60S ribosomal protein L9 OS=Mus musculus GN=Rpl9 PE=1 SV=2	1	1	1	1	1	1	1	1	1	1	5.2	5.2	5.2	21.881	192	192	0	18.913	By MS/MS	By MS/MS	5.2	5.2	605870	565310	40558	274480	0	3	2	5	190	572	TRUE	579	4186;4187;4188;4189;4190;4191;4192;4193;4194;4195;4196	2526;2527;2528;2529;2530	2529			1	0
sp|P56480|ATPB_MOUSE	sp|P56480|ATPB_MOUSE	9	9	9	>sp|Q60605|MYL6_MOUSE Myosin light polypeptide 6 OS=Mus musculus GN=Myl6 PE=1 SV=3;>sp|Q8CI43|MYL6B_MOUSE Myosin light chain 6B OS=Mus musculus GN=Myl6b PE=2 SV=1	2	1	1	1	1	1	1	1	1	1	8.6	8.6	8.6	16.93	151	151;207	0.0080483	6.346	By MS/MS	By MS/MS	8.6	8.6	314230	253420	60815	276630	0	1	1	2	333	179	TRUE	180	1372;1373;1374;1375	900;901	900			1	0
sp|P57776|EF1D_MOUSE	sp|P57776|EF1D_MOUSE	8	8	8	>sp|Q99MN1|SYK_MOUSE Lysine--tRNA ligase OS=Mus musculus GN=Kars PE=1 SV=1	1	2	2	2	2	1	2	1	2	1	4.9	4.9	4.9	67.839	595	595	0	31.179	By MS/MS	By MS/MS	4.9	2.5	449680	267890	181790	291160	0	5	4	9	502	286;457	True;True	288;461	2158;2159;2160;2161;2162;2163;2164;3361	1439;1440;1441;1442;1443;1444;1445;1446;2107	1446;2107			1	0
sp|P57780|ACTN4_MOUSE	sp|P57780|ACTN4_MOUSE	6	6	3	>sp|Q3UZ39|LRRF1_MOUSE Leucine-rich repeat flightless-interacting protein 1 OS=Mus musculus GN=Lrrfip1 PE=1 SV=2	1	1	1	1	1	0	1	0	1	0	4.3	4.3	4.3	79.248	729	729	0	9.9127	By MS/MS	By matching	4.3	0	276950	276950	0	304040	0	6	0	6	325	752	TRUE	759	5495;5496;5497	3251;3252;3253;3254;3255;3256	3255			1	0
sp|P58252|EF2_MOUSE;sp|O08810|U5S1_MOUSE	sp|P58252|EF2_MOUSE	12;1	12;1	12;1	>sp|P70349|HINT1_MOUSE Histidine triad nucleotide-binding protein 1 OS=Mus musculus GN=Hint1 PE=1 SV=3	1	1	1	1	1	1	1	1	1	1	11.1	11.1	11.1	13.777	126	126	0	6.8779	By MS/MS	By MS/MS	11.1	11.1	1019600	561050	458510	306100	0	4	1	5	274	235	TRUE	236	1730;1731;1732;1733;1734;1735;1736;1737;1738	1145;1146;1147;1148;1149;1150	1147			1	0
sp|P58771|TPM1_MOUSE	sp|P58771|TPM1_MOUSE	1	1	1	>sp|O09167|RL21_MOUSE 60S ribosomal protein L21 OS=Mus musculus GN=Rpl21 PE=2 SV=3	1	1	1	1	1	1	1	1	1	1	9.4	9.4	9.4	18.562	160	160	0	7.0135	By MS/MS	By MS/MS	9.4	9.4	794660	493590	301070	309230	0	4	3	7	44	2048	TRUE	2084	16695;16696;16697;16698;16699;16700;16701;16702;16703;16704;16705	9680;9681;9682;9683;9684;9685;9686	9686			1	0
sp|P59999|ARPC4_MOUSE	sp|P59999|ARPC4_MOUSE	3	3	3	>sp|P41105|RL28_MOUSE 60S ribosomal protein L28 OS=Mus musculus GN=Rpl28 PE=1 SV=2	1	1	1	1	1	1	1	1	1	1	8	8	8	15.733	137	137	0.0060606	6.3554	By matching	By MS/MS	8	8	450860	284310	166550	311180	0	0	1	1	165	1839	TRUE	1872	15099;15100;15101;15102;15103;15104	8741	8741			1	0
sp|P60335|PCBP1_MOUSE;sp|P57722|PCBP3_MOUSE	sp|P60335|PCBP1_MOUSE;sp|P57722|PCBP3_MOUSE	4;2	4;2	2;0	>sp|P62849|RS24_MOUSE 40S ribosomal protein S24 OS=Mus musculus GN=Rps24 PE=2 SV=1	1	2	2	2	1	2	1	2	1	2	17.3	17.3	17.3	15.423	133	133	0	12.375	By MS/MS	By MS/MS	6	17.3	1560800	641910	918860	319890	0	1	3	4	247	1310;1829	True;True	1323;1862	10469;10470;10471;10472;10473;10474;15033	5932;5933;5934;8712	5934;8712	174;175	1;74	1	0
sp|P60710|ACTB_MOUSE	sp|P60710|ACTB_MOUSE	15	15	1	>sp|P80316|TCPE_MOUSE T-complex protein 1 subunit epsilon OS=Mus musculus GN=Cct5 PE=1 SV=1	1	2	2	2	2	1	2	1	2	1	4.8	4.8	4.8	59.623	541	541	0	12.671	By MS/MS	By MS/MS	4.8	1.8	601110	323400	277710	358280	0	3	1	4	281	802;1980	True;True	809;2014	5873;5874;5875;5876;5877;5878;5879;5880;5881;5882;16230;16231;16232	3471;3472;3473;9380	3472;9380			1	0
sp|P60766|CDC42_MOUSE	sp|P60766|CDC42_MOUSE	1	1	1	>sp|P97311|MCM6_MOUSE DNA replication licensing factor MCM6 OS=Mus musculus GN=Mcm6 PE=1 SV=1	1	3	3	3	3	2	3	2	3	2	6.1	6.1	6.1	92.866	821	821	0	28.532	By MS/MS	By MS/MS	6.1	4.3	409910	341270	68640	361680	0	4	2	6	289	639;889;1281	True;True;True	646;897;1292	4657;4658;6580;6581;6582;10306;10307;10308	2812;2813;3850;5852;5853;5854;5855	2813;3850;5854	200	1	1	0
sp|P60843|IF4A1_MOUSE;sp|P10630|IF4A2_MOUSE	sp|P60843|IF4A1_MOUSE;sp|P10630|IF4A2_MOUSE	6;4	6;4	6;4	>sp|P63325|RS10_MOUSE 40S ribosomal protein S10 OS=Mus musculus GN=Rps10 PE=1 SV=1	1	2	2	2	2	1	2	1	2	1	9.1	9.1	9.1	18.916	165	165	0	27.461	By MS/MS	By matching	9.1	8.5	1058900	938010	120870	412990	0	5	0	5	264	70;939	True;True	70;947	430;431;432;433;434;6955;6956	280;281;282;4059;4060	280;4059			1	0
sp|P60867|RS20_MOUSE	sp|P60867|RS20_MOUSE	4	4	4	>sp|P48036|ANXA5_MOUSE Annexin A5 OS=Mus musculus GN=Anxa5 PE=1 SV=1	1	2	2	2	2	1	2	1	2	1	6.6	6.6	6.6	35.752	319	319	0	12.572	By MS/MS	By matching	6.6	2.8	1202100	1014300	187830	429860	0	3	0	3	181	765;1976	True;True	772;2010	5592;5593;5594;5595;16188;16189;16190;16191;16192;16193;16194;16195;16196;16197;16198;16199;16200;16201	3315;9359;9360	3315;9360			1	0
sp|P61082|UBC12_MOUSE	sp|P61082|UBC12_MOUSE	1	1	1	>sp|P97310|MCM2_MOUSE DNA replication licensing factor MCM2 OS=Mus musculus GN=Mcm2 PE=1 SV=3	1	5	5	5	5	1	5	1	5	1	7	7	7	102.08	904	904	0	31.339	By MS/MS	By MS/MS	7	1.3	486110	412430	73686	441020	0	6	0	6	288	81;103;640;692;1875	True;True;True;True;True	82;104;647;699;1909	523;660;661;4659;4660;4994;4995;4996;4997;4998;15516;15517;15518	323;431;2814;2995;2996;2997;9018;9019	323;431;2814;2997;9019			1	0
sp|P61255|RL26_MOUSE	sp|P61255|RL26_MOUSE	2	2	2	>sp|Q8C1B7|SEP11_MOUSE Septin-11 OS=Mus musculus GN=Sept11 PE=1 SV=4	1	2	2	2	2	1	2	1	2	1	5.6	5.6	5.6	49.694	431	431	0	12.391	By MS/MS	By MS/MS	5.6	3	665490	434540	230950	463140	0	5	1	6	440	305;484	True;True	307;489	2290;2291;2292;2293;2294;2295;2296;2297;3549;3550;3551	1522;1523;1524;1525;2215;2216	1522;2216			1	0
sp|P61620|S61A1_MOUSE;sp|Q9JLR1|S61A2_MOUSE	sp|P61620|S61A1_MOUSE;sp|Q9JLR1|S61A2_MOUSE	2;1	2;1	2;1	>sp|Q3THW5|H2AV_MOUSE Histone H2A.V OS=Mus musculus GN=H2afv PE=1 SV=3;>sp|P0C0S6|H2AZ_MOUSE Histone H2A.Z OS=Mus musculus GN=H2afz PE=1 SV=2	2	3	2	2	3	2	2	1	2	1	25.8	18.8	18.8	13.509	128	128;128	0	11.38	By MS/MS	By MS/MS	25.8	18	1610700	1301300	309360	559110	0	2	1	3	90	109;283;636	False;True;True	110;285;643	694;695;696;697;698;699;700;701;702;703;704;705;706;707;708;709;710;711;712;713;2145;2146;2147;4643;4644	450;451;452;453;454;455;456;457;458;459;460;461;462;463;464;465;466;467;1433;1434;2804	464;1434;2804			1	0
sp|P61804|DAD1_MOUSE	sp|P61804|DAD1_MOUSE	2	2	2	>sp|Q505G8|ZN827_MOUSE Zinc finger protein 827 OS=Mus musculus GN=Znf827 PE=2 SV=2	1	3	3	3	3	2	3	2	3	2	3.9	3.9	3.9	118.53	1078	1078	0	17.235	By MS/MS	By matching	3.9	3	1829200	924160	905080	575120	0	2	0	2	328	8;1255;1315	True;True;True	8;1266;1328	40;41;10138;10139;10140;10141;10142;10143;10144;10481;10482;10483;10484;10485;10486	33;5791;5940	33;5791;5940	225	1	1	0
sp|P61957|SUMO2_MOUSE;sp|Q9Z172|SUMO3_MOUSE	sp|P61957|SUMO2_MOUSE;sp|Q9Z172|SUMO3_MOUSE	2;1	2;1	2;1	>sp|P47915|RL29_MOUSE 60S ribosomal protein L29 OS=Mus musculus GN=Rpl29 PE=2 SV=2	1	1	1	1	1	1	1	1	1	1	6.9	6.9	6.9	17.587	160	160	0	6.7101	By MS/MS	By matching	6.9	6.9	1232700	859170	373560	590730	0	1	0	1	179	223	TRUE	224	1663;1664;1665;1666;1667;1668;1669;1670;1671	1109	1109			1	0
sp|P61979|HNRPK_MOUSE	sp|P61979|HNRPK_MOUSE	3	3	3	>sp|Q91VL8|TE2IP_MOUSE Telomeric repeat-binding factor 2-interacting protein 1 OS=Mus musculus GN=Terf2ip PE=1 SV=1	1	3	3	3	3	0	3	0	3	0	15.3	15.3	15.3	43.353	393	393	0	25.201	By MS/MS	By matching	15.3	0	656820	656820	0	687480	0	13	0	13	478	1099;1402;2080	True;True;True	1108;1416;2116	9080;9081;9082;9083;11084;11085;11086;11087;11088;11089;16960;16961	5310;5311;5312;5313;5314;5315;6264;6265;6266;6267;6268;9825;9826	5312;6267;9825			1	0
sp|P61982|1433G_MOUSE	sp|P61982|1433G_MOUSE	2	2	2	>sp|P01868|IGHG1_MOUSE Ig gamma-1 chain C region secreted form OS=Mus musculus GN=Ighg1 PE=1 SV=1;>sp|P01869|IGH1M_MOUSE Ig gamma-1 chain C region, membrane-bound form OS=Mus musculus GN=Ighg1 PE=1 SV=2	2	1	1	1	1	1	1	1	1	1	3.1	3.1	3.1	35.704	324	324;393	0	7.1843	By MS/MS	By MS/MS	3.1	3.1	1487100	1201000	286030	888490	0	8	2	10	72	416	TRUE	419	3039;3040;3041;3042;3043;3044;3045;3046;3047;3048	1955;1956;1957;1958;1959;1960;1961;1962;1963;1964	1962			1	0
sp|P62082|RS7_MOUSE	sp|P62082|RS7_MOUSE	2	2	2	>sp|P14115|RL27A_MOUSE 60S ribosomal protein L27a OS=Mus musculus GN=Rpl27a PE=2 SV=5	1	2	2	2	2	1	2	1	2	1	15.5	15.5	15.5	16.605	148	148	0	13.067	By MS/MS	By MS/MS	15.5	7.4	2627900	1754000	873900	1047900	0	5	4	9	105	1397;1765	True;True	1411;1797	11056;11057;14435;14436;14437;14438;14439;14440;14441;14442;14443;14444;14445;14446;14447	6243;8372;8373;8374;8375;8376;8377;8378;8379;8380;8381	6243;8374			1	0
sp|P62141|PP1B_MOUSE	sp|P62141|PP1B_MOUSE	1	1	1	>sp|P35486|ODPA_MOUSE Pyruvate dehydrogenase E1 component subunit alpha, somatic form, mitochondrial OS=Mus musculus GN=Pdha1 PE=1 SV=1	1	2	2	2	2	1	2	1	2	1	5.6	5.6	5.6	43.231	390	390	0	11.586	By MS/MS	By MS/MS	5.6	2.3	3340900	3315100	25828	1049600	0	2	1	3	154	133;1074	True;True	134;1083	851;852;8228;8229;8230	547;4727;4728	547;4727			1	0
sp|P62242|RS8_MOUSE	sp|P62242|RS8_MOUSE	6	6	6	>sp|Q64523|H2A2C_MOUSE Histone H2A type 2-C OS=Mus musculus GN=Hist2h2ac PE=1 SV=3;>sp|Q6GSS7|H2A2A_MOUSE Histone H2A type 2-A OS=Mus musculus GN=Hist2h2aa1 PE=1 SV=3	2	5	1	1	4	5	1	1	1	1	36.4	8.5	8.5	13.988	129	129;130	0	39.982	By MS/MS	By matching	35.7	36.4	2626000	2428500	197460	1112200	0	3	0	3	375	109;796;1352;2027;2028	False;False;True;False;False	110;803;1366;2062;2063	694;695;696;697;698;699;700;701;702;703;704;705;706;707;708;709;710;711;712;713;5832;5833;5834;5835;5836;5837;5838;5839;5840;5841;5842;10699;10700;10701;10702;10703;10704;10705;10706;10707;16533;16534;16535;16536;16537;16538;16539;16540;16541;16542;16543;16544;16545;16546;16547;16548;16549;16550;16551;16552;16553;16554;16555;16556;16557;16558;16559;16560;16561;16562;16563;16564;16565;16566;16567	450;451;452;453;454;455;456;457;458;459;460;461;462;463;464;465;466;467;3452;3453;3454;3455;3456;3457;3458;3459;3460;3461;6074;6075;6076;9569;9570;9571;9572;9573;9574;9575;9576;9577;9578;9579;9580;9581;9582;9583;9584;9585;9586;9587;9588;9589	464;3457;6075;9586;9589			1	0
sp|P62259|1433E_MOUSE	sp|P62259|1433E_MOUSE	3	3	3	>sp|O35144|TERF2_MOUSE Telomeric repeat-binding factor 2 OS=Mus musculus GN=Terf2 PE=1 SV=3	1	3	3	3	3	0	3	0	3	0	6.7	6.7	6.7	60.263	541	541	0	24.908	By MS/MS	By matching	6.7	0	1071400	1071400	0	1176700	0	7	0	7	47	192;1725;1739	True;True;True	193;1755;1769	1448;1449;1450;1451;14170;14171;14172;14173;14260	960;961;962;963;8209;8260;8261	963;8209;8261	46	194	1	0
sp|P62264|RS14_MOUSE	sp|P62264|RS14_MOUSE	2	2	2	>sp|Q6URW6|MYH14_MOUSE Myosin-14 OS=Mus musculus GN=Myh14 PE=1 SV=1	1	3	1	1	3	3	1	1	1	1	1.1	0.6	0.6	228.58	2000	2000	0	7.3684	By matching	By MS/MS	1.1	1.1	2062900	1135000	927930	1177800	0	0	2	2	387	511;561;967	True;False;False	516;568;975	3674;3675;3676;3677;3678;3679;3680;3681;3682;3683;3684;3685;3686;3687;3688;4129;4130;4131;4132;4133;7316;7317;7318;7319;7320;7321;7322;7323	2275;2276;2499;2500;2501;2502;4306;4307	2275;2499;4306			1	0
sp|P62267|RS23_MOUSE	sp|P62267|RS23_MOUSE	2	2	2	>sp|P61957|SUMO2_MOUSE Small ubiquitin-related modifier 2 OS=Mus musculus GN=Sumo2 PE=1 SV=1;>sp|Q9Z172|SUMO3_MOUSE Small ubiquitin-related modifier 3 OS=Mus musculus GN=Sumo3 PE=1 SV=1	2	2	2	2	2	1	2	1	2	1	23.2	23.2	23.2	10.871	95	95;110	0	23.296	By MS/MS	By MS/MS	23.2	12.6	3394900	2836900	558050	2839200	0	9	5	14	223	49;1862	True;True	49;1896	288;15290;15291;15292;15293;15294;15295;15296;15297;15298;15299;15300;15301;15302;15303;15304	188;8839;8840;8841;8842;8843;8844;8845;8846;8847;8848;8849;8850;8851;8852	188;8845			1	0
sp|P62270|RS18_MOUSE	sp|P62270|RS18_MOUSE	7	7	7	>sp|P30681|HMGB2_MOUSE High mobility group protein B2 OS=Mus musculus GN=Hmgb2 PE=1 SV=3	1	2	2	2	2	1	2	1	2	1	11	11	11	24.162	210	210	0	11.357	By MS/MS	By MS/MS	11	3.8	15494000	6975800	8518000	6882300	0	3	1	4	147	861;1297	True;True	868;1309	6375;6376;6377;6378;10387;10388;10389;10390;10391;10392;10393;10394;10395;10396;10397;10398;10399;10400;10401	3742;5894;5895;5896	3742;5896			1	0
sp|P62281|RS11_MOUSE	sp|P62281|RS11_MOUSE	4	4	4	>sp|Q8BWS5|GRIN3_MOUSE G protein-regulated inducer of neurite outgrowth 3 OS=Mus musculus GN=Gprin3 PE=1 SV=1	1	1	1	1	1	1	1	1	1	1	1.2	1.2	1.2	80.484	763	763	0.0042017	6.4587	By MS/MS	By MS/MS	1.2	1.2	66673000	32088000	34585000	11050000	0	4	1	5	435	255	TRUE	256	1912;1913;1914;1915;1916;1917;1918;1919;1920;1921;1922;1923;1924;1925;1926	1294;1295;1296;1297;1298	1298			1	0
sp|P62301|RS13_MOUSE	sp|P62301|RS13_MOUSE	4	4	4	>sp|Q6YND2|ZN653_MOUSE Zinc finger protein 653 OS=Mus musculus GN=Znf653 PE=2 SV=2	1	1	1	1	1	1	1	1	1	1	2	2	2	67.516	615	615	0.0043103	6.5712	By matching	By MS/MS	2	2	63612000	39342000	24270000	15347000	0	0	0	0	388	468	TRUE	473	3452;3453;3454;3455;3456;3457;3458;3459;3460;3461;3462;3463;3464;3465;3466	2157	2157	256	395	1	0
sp|P62317|SMD2_MOUSE	sp|P62317|SMD2_MOUSE	1	1	1	>sp|P49312|ROA1_MOUSE Heterogeneous nuclear ribonucleoprotein A1 OS=Mus musculus GN=Hnrnpa1 PE=1 SV=2	1	2	2	2	2	2	2	2	2	2	8.8	8.8	8.8	34.196	320	320	0	12.874	By MS/MS	By MS/MS	8.8	8.8	500280	412450	87827	203900	64290	5	1	6	183	826;1395	True;True	833;1409	6066;6067;6068;6069;6070;11036;11037;11038;11039;11040;11041;11042;11043;11044;11045;11046;11047	3576;6235;6236;6237;6238;6239	3576;6239	126	137	1	0.315302
sp|P62702|RS4X_MOUSE	sp|P62702|RS4X_MOUSE	4	4	4	>sp|Q920B9|SP16H_MOUSE FACT complex subunit SPT16 OS=Mus musculus GN=Supt16h PE=1 SV=2	1	5	5	5	5	4	5	4	5	4	5.4	5.4	5.4	119.82	1047	1047	0	31.994	By MS/MS	By MS/MS	5.4	4.4	998240	814700	183540	836700	264440	6	2	8	486	36;322;471;1233;1984	True;True;True;True;True	36;324;476;1243;2018	214;215;2424;2425;2426;3473;3474;3475;3476;3477;9983;9984;9985;9986;16248;16249;16250;16251	140;1596;1597;2162;2163;2164;2165;5716;9392	140;1597;2163;5716;9392	319	203	1	0.316051
sp|P62717|RL18A_MOUSE	sp|P62717|RL18A_MOUSE	3	3	3	>sp|P09602|HMGN2_MOUSE Non-histone chromosomal protein HMG-17 OS=Mus musculus GN=Hmgn2 PE=1 SV=2	1	3	3	3	3	1	3	1	3	1	32.2	32.2	32.2	9.4226	90	90	0	37.201	By MS/MS	By MS/MS	32.2	16.7	3163000	2585900	577110	1157100	410030	8	2	10	89	1205;1206;1727	True;True;True	1215;1216;1757	9761;9762;9763;9764;9765;9766;9767;9768;9769;9770;9771;9772;9773;9774;9775;9776;9777;9778;9779;14176;14177	5620;5621;5622;5623;5624;5625;5626;5627;8212;8213	5620;5622;8213			1	0.35436
sp|P63268|ACTH_MOUSE;sp|P68134|ACTS_MOUSE;sp|P68033|ACTC_MOUSE;sp|P62737|ACTA_MOUSE	sp|P63268|ACTH_MOUSE;sp|P68134|ACTS_MOUSE;sp|P68033|ACTC_MOUSE;sp|P62737|ACTA_MOUSE	12;12;12;12	2;2;2;2	2;2;2;2	>sp|Q8BMJ2|SYLC_MOUSE Leucine--tRNA ligase, cytoplasmic OS=Mus musculus GN=Lars PE=1 SV=2	1	2	2	2	2	2	2	2	2	2	1.9	1.9	1.9	134.19	1178	1178	0	12.048	By MS/MS	By matching	1.9	1.9	137040	106220	30822	115110	42871	4	0	4	421	560;1930	True;True	567;1964	4126;4127;4128;15902;15903;15904	2497;2498;9219;9220	2498;9220			1	0.372435
sp|P62751|RL23A_MOUSE	sp|P62751|RL23A_MOUSE	3	3	3	>sp|Q62318|TIF1B_MOUSE Transcription intermediary factor 1-beta OS=Mus musculus GN=Trim28 PE=1 SV=3	1	3	3	3	3	3	3	3	3	3	5	5	5	88.846	834	834	0	21.176	By MS/MS	By MS/MS	5	5	1047500	816050	231450	824650	337350	6	4	10	368	1065;1230;1538	True;True;True	1074;1240;1565	8174;8175;8176;8177;8178;9976;9977;9978;12630;12631;12632;12633;12634;12635	4704;4705;4706;4707;4708;5710;5711;7314;7315;7316	4706;5710;7314			1	0.409083
sp|P62754|RS6_MOUSE	sp|P62754|RS6_MOUSE	5	5	5	>sp|P62827|RAN_MOUSE GTP-binding nuclear protein Ran OS=Mus musculus GN=Ran PE=1 SV=3;>sp|Q61820|RANT_MOUSE GTP-binding nuclear protein Ran, testis-specific isoform OS=Mus musculus GN=Rasl2-9 PE=2 SV=1	2	4	4	4	4	4	4	4	4	4	20.8	20.8	20.8	24.423	216	216;216	0	31.555	By MS/MS	By MS/MS	20.8	20.8	3295400	2032000	1263400	1436300	590730	12	10	22	245	30;590;1387;1882	True;True;True;True	30;597;1401;1916	167;168;169;170;171;172;173;174;175;176;177;178;179;180;4331;4332;4333;4334;11006;11007;11008;11009;11010;11011;11012;15559;15560;15561;15562;15563;15564;15565;15566;15567	106;107;108;109;110;111;112;113;114;115;116;117;118;119;120;2617;2618;6216;6217;6218;9038;9039;9040;9041	112;2618;6217;9039			1	0.411286
sp|P62774|MTPN_MOUSE	sp|P62774|MTPN_MOUSE	1	1	1	>sp|Q9JJ28|FLII_MOUSE Protein flightless-1 homolog OS=Mus musculus GN=Flii PE=1 SV=1	1	3	3	3	3	2	3	2	3	2	2.4	2.4	2.4	144.8	1271	1271	0	17.502	By MS/MS	By matching	2.4	1.7	156730	135360	21366	121260	50044	4	0	4	568	61;1156;1285	True;True;True	61;1165;1297	349;350;351;9462;9463;10328;10329;10330	219;5484;5485;5862	219;5484;5862	361	1	1	0.4127
sp|P62806|H4_MOUSE	sp|P62806|H4_MOUSE	11	11	11	>sp|Q61881|MCM7_MOUSE DNA replication licensing factor MCM7 OS=Mus musculus GN=Mcm7 PE=1 SV=1	1	4	4	4	4	2	4	2	4	2	7.2	7.2	7.2	81.21	719	719	0	51.248	By MS/MS	By matching	7.2	3.9	557680	454400	103280	443240	185750	6	0	6	361	183;740;888;1586	True;True;True;True	184;747;896;1614	1400;5323;5324;5325;5326;5327;5328;5329;5330;6578;6579;13132;13133	923;3163;3164;3849;7622;7623	923;3163;3849;7623			1	0.419073
sp|P62814|VATB2_MOUSE	sp|P62814|VATB2_MOUSE	1	1	1	>sp|O88569|ROA2_MOUSE Heterogeneous nuclear ribonucleoproteins A2/B1 OS=Mus musculus GN=Hnrnpa2b1 PE=1 SV=2	1	2	2	2	2	2	2	2	2	2	6.5	6.5	6.5	37.402	353	353	0	11.823	By MS/MS	By MS/MS	6.5	6.5	909030	717610	191420	338200	153220	4	2	6	70	445;671	True;True	449;678	3241;3242;3243;3244;3245;3246;3247;3248;3249;3250;3251;3252;4837;4838;4839;4840;4841;4842;4843;4844;4845	2057;2900;2901;2902;2903;2904	2057;2902			1	0.453046
sp|P62821|RAB1A_MOUSE	sp|P62821|RAB1A_MOUSE	1	1	1	>sp|Q9EPL8|IPO7_MOUSE Importin-7 OS=Mus musculus GN=Ipo7 PE=1 SV=2	1	2	2	2	2	2	2	2	2	2	2	2	2	119.49	1038	1038	0	15.641	By MS/MS	By MS/MS	2	2	481390	401140	80243	214030	99196	3	2	5	558	84;129	True;True	85;130	555;556;557;558;820;821;822;823;824	361;362;363;364;530	361;530			1	0.463468
sp|P62827|RAN_MOUSE;sp|Q61820|RANT_MOUSE	sp|P62827|RAN_MOUSE;sp|Q61820|RANT_MOUSE	4;3	4;3	4;3	>sp|P63276|RS17_MOUSE 40S ribosomal protein S17 OS=Mus musculus GN=Rps17 PE=1 SV=2	1	2	2	2	2	2	2	2	2	2	15.6	15.6	15.6	15.524	135	135	0	25.33	By MS/MS	By matching	15.6	15.6	571930	381770	190150	210270	98501	4	0	4	263	1100;1881	True;True	1109;1915	9084;9085;9086;9087;15554;15555;15556;15557;15558	5316;5317;9036;9037	5317;9037			1	0.46845
sp|P62830|RL23_MOUSE	sp|P62830|RL23_MOUSE	3	3	3	>sp|Q3TEA8|HP1B3_MOUSE Heterochromatin protein 1-binding protein 3 OS=Mus musculus GN=Hp1bp3 PE=1 SV=1	1	3	3	3	3	2	3	2	3	2	5.4	5.4	5.4	60.866	554	554	0	27.304	By MS/MS	By MS/MS	5.4	3.6	589040	485390	103650	442800	208140	6	1	7	313	628;629;1275	True;True;True	635;636;1286	4586;4587;4588;4589;4590;4591;4592;4593;4594;4595;4596;4597;10276	2778;2779;2780;2781;2782;2783;5831	2782;2783;5831	220	163	1	0.470054
sp|P62849|RS24_MOUSE	sp|P62849|RS24_MOUSE	2	2	2	>sp|Q9CY50|SSRA_MOUSE Translocon-associated protein subunit alpha OS=Mus musculus GN=Ssr1 PE=1 SV=1	1	2	2	2	2	2	2	2	2	2	6.6	6.6	6.6	32.065	286	286	0	12.422	By MS/MS	By MS/MS	6.6	6.6	1276800	865980	410780	369910	174170	4	1	5	525	582;646	True;True	589;653	4294;4295;4296;4297;4298;4299;4300;4301;4302;4303;4304;4305;4306;4307;4687;4688;4689;4690;4691;4692	2601;2602;2826;2827;2828	2602;2826			1	0.470844
sp|P62855|RS26_MOUSE	sp|P62855|RS26_MOUSE	2	2	2	>sp|P62702|RS4X_MOUSE 40S ribosomal protein S4, X isoform OS=Mus musculus GN=Rps4x PE=2 SV=2	1	4	4	4	4	2	4	2	4	2	16.7	16.7	16.7	29.597	263	263	0	32.424	By MS/MS	By MS/MS	16.7	8.4	4743700	2946500	1797200	1700800	853630	13	2	15	236	685;797;1216;1987	True;True;True;True	692;804;1226;2022	4968;4969;5843;5844;5845;5846;5847;9835;9836;9837;9838;9839;9840;9841;9842;9843;9844;9845;9846;9847;9848;9849;9850;16263;16264;16265;16266;16267;16268;16269;16270;16271;16272	2980;2981;3462;3463;5657;5658;5659;5660;5661;9402;9403;9404;9405;9406;9407	2981;3463;5659;9405			1	0.501899
sp|P62862|RS30_MOUSE	sp|P62862|RS30_MOUSE	4	4	4	>sp|P37804|TAGL_MOUSE Transgelin OS=Mus musculus GN=Tagln PE=1 SV=3	1	3	3	3	3	3	3	3	3	3	15.9	15.9	15.9	22.576	201	201	0	18.282	By MS/MS	By MS/MS	15.9	15.9	1199500	864800	334680	478710	240890	4	3	7	159	15;364;1789	True;True;True	15;367;1821	66;67;68;69;70;71;72;73;74;2741;2742;2743;2744;2745;2746;2747;14651;14652;14653;14654;14655	60;1806;1807;1808;1809;1810;8491	60;1807;8491	110	131	1	0.503207
sp|P62889|RL30_MOUSE	sp|P62889|RL30_MOUSE	3	3	3	>sp|P25206|MCM3_MOUSE DNA replication licensing factor MCM3 OS=Mus musculus GN=Mcm3 PE=1 SV=2	1	4	4	4	4	4	4	4	4	4	6.8	6.8	6.8	91.545	812	812	0	30.516	By MS/MS	By MS/MS	6.8	6.8	1013300	745250	268040	761050	383330	7	5	12	134	117;638;741;2101	True;True;True;True	118;645;748;2139	755;756;757;758;759;760;761;4653;4654;4655;4656;5331;5332;5333;17187;17188;17189;17190	490;491;492;493;494;495;496;2811;3165;3166;9973;9974	493;2811;3166;9974			1	0.503686
sp|P62908|RS3_MOUSE	sp|P62908|RS3_MOUSE	8	8	8	>sp|O35639|ANXA3_MOUSE Annexin A3 OS=Mus musculus GN=Anxa3 PE=1 SV=4	1	3	3	3	2	3	2	3	2	3	11.1	11.1	11.1	36.384	323	323	0	18.273	By MS/MS	By MS/MS	6.2	11.1	711630	433430	278200	185160	94558	4	3	7	51	622;754;1785	True;True;True	629;761;1817	4559;4560;4561;4562;4563;4564;5503;14610;14611;14612;14613	2759;2760;2761;2762;2763;3263;8462	2760;3263;8462			1	0.510683
sp|P62918|RL8_MOUSE	sp|P62918|RL8_MOUSE	1	1	1	>sp|Q02053|UBA1_MOUSE Ubiquitin-like modifier-activating enzyme 1 OS=Mus musculus GN=Uba1 PE=1 SV=1	1	5	5	5	5	3	5	3	5	3	6.6	6.6	6.6	117.81	1058	1058	0	42.873	By MS/MS	By MS/MS	6.6	4.3	1103000	712360	390660	834540	441350	10	7	17	301	390;1043;1068;1307;1356	True;True;True;True;True	393;1051;1077;1320;1370	2862;2863;2864;2865;7978;7979;7980;7981;7982;7983;7984;7985;7986;7987;8187;8188;10462;10745;10746;10747;10748;10749;10750;10751	1867;1868;1869;1870;4629;4630;4631;4632;4633;4712;5927;6090;6091;6092;6093;6094;6095;6096	1867;4633;4712;5927;6094	205;206	69;1015	1	0.528854
sp|P62960|YBOX1_MOUSE	sp|P62960|YBOX1_MOUSE	1	1	1	>sp|P61982|1433G_MOUSE 14-3-3 protein gamma OS=Mus musculus GN=Ywhag PE=1 SV=2	1	2	2	2	2	2	2	2	2	2	9.3	9.3	9.3	28.302	247	247	0	14.344	By MS/MS	By MS/MS	9.3	9.3	1356800	908400	448440	529380	280960	6	1	7	225	1424;1893	True;True	1439;1927	11253;11254;11255;11256;11257;11258;11259;15632;15633;15634;15635;15636;15637;15638;15639;15640;15641;15642;15643;15644	6368;6369;9087;9088;9089;9090;9091	6368;9088			1	0.530734
sp|P63001|RAC1_MOUSE;sp|Q05144|RAC2_MOUSE;sp|P60764|RAC3_MOUSE	sp|P63001|RAC1_MOUSE;sp|Q05144|RAC2_MOUSE;sp|P60764|RAC3_MOUSE	2;1;1	2;1;1	2;1;1	>sp|P54822|PUR8_MOUSE Adenylosuccinate lyase OS=Mus musculus GN=Adsl PE=2 SV=2	1	2	2	2	2	2	2	2	2	2	4.5	4.5	4.5	54.866	484	484	0	11.627	By MS/MS	By matching	4.5	4.5	166640	130990	35656	123090	65662	2	0	2	197	89;1975	True;True	90;2009	574;575;576;16185;16186;16187	379;9358	379;9358			1	0.533447
sp|P63017|HSP7C_MOUSE;sp|P17156|HSP72_MOUSE	sp|P63017|HSP7C_MOUSE	20;8	20;8	16;4	>sp|P14131|RS16_MOUSE 40S ribosomal protein S16 OS=Mus musculus GN=Rps16 PE=2 SV=4	1	3	3	3	3	3	3	3	3	3	21.9	21.9	21.9	16.445	146	146	0	18.956	By MS/MS	By MS/MS	21.9	21.9	2486400	1823000	663420	964620	515890	2	5	7	106	461;715;1139	True;True;True	465;722;1148	3395;3396;3397;3398;3399;3400;3401;3402;5135;5136;5137;5138;5139;5140;5141;9362;9363;9364;9365;9366;9367;9368;9369;9370;9371;9372;9373;9374;9375	2138;3068;3069;3070;5453;5454;5455	2138;3068;5455			1	0.534812
sp|P63038|CH60_MOUSE	sp|P63038|CH60_MOUSE	8	8	8	>sp|Q9EQH3|VPS35_MOUSE Vacuolar protein sorting-associated protein 35 OS=Mus musculus GN=Vps35 PE=1 SV=1	1	2	2	2	2	2	2	2	2	2	3.3	3.3	3.3	91.712	796	796	0	12.53	By MS/MS	By MS/MS	3.3	3.3	440280	281130	159150	322320	175970	4	1	5	559	1218;1494	True;True	1228;1509	9852;9853;9854;9855;9856;9857;9858;11807;11808;11809;11810;11811	5663;6617;6618;6619;6620	5663;6618			1	0.545948
sp|P63085|MK01_MOUSE	sp|P63085|MK01_MOUSE	1	1	1	>sp|P50247|SAHH_MOUSE Adenosylhomocysteinase OS=Mus musculus GN=Ahcy PE=1 SV=3	1	3	3	3	3	3	3	3	3	3	8.8	8.8	8.8	47.688	432	432	0	19.728	By MS/MS	By MS/MS	8.8	8.8	1087700	740340	347340	799980	437310	7	4	11	186	166;1880;1994	True;True;True	167;1914;2029	1267;1268;1269;15546;15547;15548;15549;15550;15551;15552;15553;16322;16323;16324;16325;16326;16327;16328;16329;16330	829;830;831;832;9033;9034;9035;9436;9437;9438;9439	831;9034;9436	127;128	29;33	1	0.546651
sp|P63101|1433Z_MOUSE	sp|P63101|1433Z_MOUSE	3	3	3	>sp|P47738|ALDH2_MOUSE Aldehyde dehydrogenase, mitochondrial OS=Mus musculus GN=Aldh2 PE=1 SV=1	1	3	3	3	3	2	3	2	3	2	6.4	6.4	6.4	56.537	519	519	0	18.266	By MS/MS	By matching	6.4	3.9	373140	280690	92452	274800	151330	5	0	5	175	1126;1750;2039	True;True;True	1135;1781;2075	9268;9269;9270;9271;9272;14357;16658;16659;16660;16661;16662;16663;16664	5389;5390;5391;8331;9660	5391;8331;9660			1	0.550691
sp|P63158|HMGB1_MOUSE	sp|P63158|HMGB1_MOUSE	1	1	1	>sp|Q9JKF1|IQGA1_MOUSE Ras GTPase-activating-like protein IQGAP1 OS=Mus musculus GN=Iqgap1 PE=1 SV=2	1	4	4	4	3	3	3	3	3	3	2.5	2.5	2.5	188.74	1657	1657	0	24.926	By MS/MS	By MS/MS	1.8	2	164220	118310	45917	117780	65378	4	1	5	573	371;1085;1188;1792	True;True;True;True	374;1094;1198;1824	2782;8314;8315;8316;8317;9655;14676;14677;14678	1826;4776;4777;5571;8500	1826;4777;5571;8500			1	0.555086
sp|P63260|ACTG_MOUSE	sp|P63260|ACTG_MOUSE	15	1	1	>sp|P43276|H15_MOUSE Histone H1.5 OS=Mus musculus GN=Hist1h1b PE=1 SV=2	1	31	21	21	28	31	20	21	20	21	53.8	38.6	38.6	22.576	223	223	0	323.31	By MS/MS	By MS/MS	53.4	53.8	4377300000	3271600000	1105700000	1074100000	602010000	226	154	380	172	34;150;151;152;158;159;281;515;516;677;678;749;750;751;757;758;759;760;937;948;951;952;957;1001;1325;1460;1523;1524;1525;1526;1609	False;True;True;True;True;True;True;True;True;True;True;False;False;False;False;False;False;False;False;True;True;True;True;True;True;True;True;True;True;True;False	34;151;152;153;159;160;283;520;521;684;685;756;757;758;764;765;766;767;945;956;959;960;965;1009;1338;1475;1547;1548;1549;1550;1551;1552;1637	192;193;194;195;196;197;198;199;200;201;202;203;204;1021;1022;1023;1024;1025;1026;1027;1028;1029;1030;1031;1032;1033;1034;1035;1036;1037;1038;1039;1040;1041;1042;1043;1044;1045;1046;1047;1048;1049;1050;1051;1185;1186;1187;1188;1189;1190;1191;1192;1193;1194;1195;1196;1197;1198;1199;1200;1201;1202;1203;1204;1205;1206;1207;1208;1209;1210;1211;1212;1213;1214;1215;1216;1217;1218;1219;1220;1221;1222;12…	133;134;135;643;644;645;646;647;648;649;650;764;765;766;767;768;769;770;771;772;773;774;775;776;777;778;779;780;781;782;783;784;785;786;787;788;789;790;791;792;793;794;795;796;797;798;799;800;801;802;803;804;805;806;807;1388;1389;1390;1391;1392;1393;1394;1395;1396;1397;1398;1399;1400;1401;1402;1403;1404;1405;1406;1407;1408;1409;1410;1411;1412;1413;1414;1415;1416;1417;1418;1419;1420;1421;1422;1423…	134;645;647;648;783;802;1414;2295;2302;2925;2940;3219;3243;3249;3292;3296;3298;3299;4056;4072;4118;4147;4283;4441;5957;6497;7111;7225;7234;7236;7710	121	1	1	0.560479
sp|P63276|RS17_MOUSE	sp|P63276|RS17_MOUSE	2	2	2	>sp|P63101|1433Z_MOUSE 14-3-3 protein zeta/delta OS=Mus musculus GN=Ywhaz PE=1 SV=1	1	3	3	3	3	2	3	2	3	2	14.3	14.3	14.3	27.771	245	245	0	178.77	By MS/MS	By MS/MS	14.3	9.4	2027900	1415100	612870	791280	451470	13	10	23	260	581;1280;1696	True;True;True	588;1291;1725	4290;4291;4292;4293;10290;10291;10292;10293;10294;10295;10296;10297;10298;10299;10300;10301;10302;10303;10304;10305;13945;13946;13947;13948;13949;13950;13951;13952;13953;13954;13955;13956;13957	2599;2600;5844;5845;5846;5847;5848;5849;5850;5851;8073;8074;8075;8076;8077;8078;8079;8080;8081;8082;8083;8084;8085	2600;5848;8078	186	1	1	0.570557
sp|P63325|RS10_MOUSE	sp|P63325|RS10_MOUSE	2	2	2	>sp|P62267|RS23_MOUSE 40S ribosomal protein S23 OS=Mus musculus GN=Rps23 PE=1 SV=3	1	2	2	2	2	2	2	2	2	2	14	14	14	15.807	143	143	0	12.72	By MS/MS	By MS/MS	14	14	1359600	944570	415030	518280	300360	5	4	9	231	945;1864	True;True	953;1898	6982;6983;6984;6985;6986;15308;15309;15310;15311;15312;15313;15314;15315;15316;15317;15318;15319	4068;8854;8855;8856;8857;8858;8859;8860;8861	4068;8856			1	0.579532
sp|P67778|PHB_MOUSE	sp|P67778|PHB_MOUSE	2	2	2	>sp|Q8BMS1|ECHA_MOUSE Trifunctional enzyme subunit alpha, mitochondrial OS=Mus musculus GN=Hadha PE=1 SV=1	1	2	2	2	2	2	2	2	2	2	3.8	3.8	3.8	82.669	763	763	0	14.351	By MS/MS	By MS/MS	3.8	3.8	244630	173070	71562	171860	100300	6	1	7	423	107;407	True;True	108;410	675;676;677;678;679;2971;2972;2973	438;439;440;441;442;1916;1917	440;1917			1	0.583615
sp|P67984|RL22_MOUSE	sp|P67984|RL22_MOUSE	2	2	2	>sp|Q922D8|C1TC_MOUSE C-1-tetrahydrofolate synthase, cytoplasmic OS=Mus musculus GN=Mthfd1 PE=1 SV=4	1	4	4	4	4	4	4	4	4	4	5.7	5.7	5.7	101.2	935	935	0	29.965	By MS/MS	By MS/MS	5.7	5.7	446960	291010	155950	318470	185870	6	6	12	490	333;1726;1729;2103	True;True;True;True	335;1756;1759;2141	2490;2491;2492;2493;14174;14175;14180;14181;14182;14183;17206;17207;17208;17209	1641;1642;1643;8210;8211;8215;8216;8217;9976;9977;9978;9979	1642;8211;8215;9976			1	0.583634
sp|P68040|GBLP_MOUSE	sp|P68040|GBLP_MOUSE	5	5	5	>sp|Q9Z204|HNRPC_MOUSE Heterogeneous nuclear ribonucleoproteins C1/C2 OS=Mus musculus GN=Hnrnpc PE=1 SV=1	1	2	2	2	2	2	2	2	2	2	8.9	8.9	8.9	34.384	313	313	0	13.541	By MS/MS	By MS/MS	8.9	8.9	313360	188440	124920	225860	132150	5	2	7	599	1301;1909	True;True	1313;1943	10425;10426;10427;15734;15735;15736;15737;15738;15739;15740	5905;5906;5907;5908;9135;9136;9137	5907;9135	375	74	1	0.585097
sp|P68254|1433T_MOUSE	sp|P68254|1433T_MOUSE	1	1	1	>sp|P67778|PHB_MOUSE Prohibitin OS=Mus musculus GN=Phb PE=1 SV=1	1	2	2	2	2	2	2	2	2	2	7.7	7.7	7.7	29.82	272	272	0	12.409	By MS/MS	By matching	7.7	7.7	737030	565130	171900	200600	117830	5	0	5	265	24;559	True;True	24;566	132;133;134;135;4117;4118;4119;4120;4121;4122;4123;4124;4125	90;2493;2494;2495;2496	90;2494			1	0.587388
sp|P68372|TBB4B_MOUSE;sp|Q9D6F9|TBB4A_MOUSE;sp|Q922F4|TBB6_MOUSE	sp|P68372|TBB4B_MOUSE;sp|Q9D6F9|TBB4A_MOUSE	8;6;2	3;3;1	2;2;0	>sp|Q68FD5|CLH1_MOUSE Clathrin heavy chain 1 OS=Mus musculus GN=Cltc PE=1 SV=3	1	4	4	4	4	3	4	3	4	3	3.3	3.3	3.3	191.55	1675	1675	0	24.555	By MS/MS	By MS/MS	3.3	2.4	897600	462620	434980	647210	380710	2	3	5	377	726;931;1054;1160	True;True;True;True	733;939;1062;1170	5207;6900;6901;6902;6903;8064;8065;8066;9489;9490;9491;9492;9493	3094;4033;4671;4672;5493;5494	3094;4033;4671;5494			1	0.588233
sp|P68510|1433F_MOUSE	sp|P68510|1433F_MOUSE	2	2	2	>sp|Q01320|TOP2A_MOUSE DNA topoisomerase 2-alpha OS=Mus musculus GN=Top2a PE=1 SV=2	1	5	5	3	5	3	5	3	3	1	4.7	4.7	3.1	172.79	1528	1528	0	30.9	By MS/MS	By MS/MS	4.7	2.7	426170	309530	116640	298880	175820	11	1	12	298	487;657;828;1412;2096	True;True;True;True;True	492;664;835;1426;2134	3555;3556;3557;4758;6074;6075;6076;6077;11172;11173;11174;11175;17161;17162	2220;2221;2860;3580;3581;6314;6315;6316;6317;9960;9961;9962	2221;2860;3580;6316;9962			1	0.588263
sp|P70168|IMB1_MOUSE	sp|P70168|IMB1_MOUSE	4	4	4	>sp|Q99020|ROAA_MOUSE Heterogeneous nuclear ribonucleoprotein A/B OS=Mus musculus GN=Hnrnpab PE=1 SV=1	1	2	2	2	2	2	2	2	2	2	9.5	9.5	9.5	30.831	285	285	0	20.637	By MS/MS	By MS/MS	9.5	9.5	1020700	793350	227300	543500	320480	11	6	17	496	544;830	True;True	551;837	4004;4005;4006;4007;4008;4009;4010;4011;4012;4013;4014;4015;4016;4017;6084;6085;6086;6087;6088;6089;6090;6091;6092;6093;6094;6095	2427;2428;2429;2430;2431;2432;2433;2434;2435;2436;2437;2438;2439;3583;3584;3585;3586	2429;3585			1	0.58966
sp|P70296|PEBP1_MOUSE	sp|P70296|PEBP1_MOUSE	2	2	2	>sp|Q8BMK4|CKAP4_MOUSE Cytoskeleton-associated protein 4 OS=Mus musculus GN=Ckap4 PE=1 SV=2	1	12	12	12	11	8	11	8	11	8	23.7	23.7	23.7	63.691	575	575	0	83.655	By MS/MS	By MS/MS	22.4	17.2	2095700	1426600	669090	1495600	883710	22	9	31	422	173;366;514;825;1073;1195;1558;1591;1655;1664;1717;1869	True;True;True;True;True;True;True;True;True;True;True;True	174;369;519;832;1082;1205;1585;1619;1683;1692;1747;1903	1321;2752;3713;3714;3715;3716;6058;6059;6060;6061;6062;6063;6064;6065;8225;8226;8227;9688;9689;12828;13162;13163;13164;13597;13598;13599;13600;13601;13602;13603;13658;13659;13660;13661;13662;13663;13664;14123;14124;14125;14126;14127;14128;14129;14130;14131;14132;15365;15366;15367;15368	873;1816;2288;2289;3569;3570;3571;3572;3573;3574;3575;4726;5590;5591;7433;7638;7639;7640;7641;7873;7874;7875;7876;7877;7917;7918;8185;8186;8187;8188;8891	873;1816;2289;3574;4726;5590;7433;7641;7876;7918;8187;8891	274;275	297;403	1	0.590873
sp|P70302|STIM1_MOUSE	sp|P70302|STIM1_MOUSE	1	1	1	>sp|P67984|RL22_MOUSE 60S ribosomal protein L22 OS=Mus musculus GN=Rpl22 PE=1 SV=2	1	2	2	2	2	2	2	2	2	2	18.8	18.8	18.8	14.759	128	128	0	12.545	By MS/MS	By MS/MS	18.8	18.8	1850600	1119900	730730	699340	413700	2	3	5	266	111;918	True;True	112;926	718;719;720;721;722;723;724;725;726;727;728;6778;6779;6780;6781	471;472;473;3970;3971	473;3970			1	0.591558
sp|P70349|HINT1_MOUSE	sp|P70349|HINT1_MOUSE	1	1	1	>sp|Q921M3|SF3B3_MOUSE Splicing factor 3B subunit 3 OS=Mus musculus GN=Sf3b3 PE=2 SV=1	1	3	3	3	2	3	2	3	2	3	3.5	3.5	3.5	135.55	1217	1217	0	18.686	By MS/MS	By MS/MS	2.1	3.5	178650	121580	57079	122980	73272	3	2	5	487	571;1812;1842	True;True;True	578;1844;1875	4183;4184;4185;14919;15121;15122;15123	2523;2524;2525;8642;8748	2525;8642;8748			1	0.595804
sp|P70372|ELAV1_MOUSE	sp|P70372|ELAV1_MOUSE	1	1	1	>sp|Q8BU30|SYIC_MOUSE Isoleucine--tRNA ligase, cytoplasmic OS=Mus musculus GN=Iars PE=2 SV=2	1	5	5	5	5	4	5	4	5	4	4.6	4.6	4.6	144.27	1262	1262	0	32.233	By MS/MS	By MS/MS	4.6	3.3	457720	290430	167290	324140	194990	7	2	9	430	467;1084;1261;1420;2072	True;True;True;True;True	472;1093;1272;1435;2108	3451;8311;8312;8313;10196;10197;10198;10199;11230;11231;11232;16905;16906;16907;16908	2156;4775;5810;5811;5812;5813;6354;6355;9807	2156;4775;5811;6355;9807			1	0.601561
sp|P70399|TP53B_MOUSE	sp|P70399|TP53B_MOUSE	1	1	1	>sp|Q99L47|F10A1_MOUSE Hsc70-interacting protein OS=Mus musculus GN=St13 PE=1 SV=1	1	2	2	2	2	2	2	2	2	2	7.3	7.3	7.3	41.655	371	371	0	12.999	By MS/MS	By MS/MS	7.3	7.3	294600	205950	88651	209410	127980	5	1	6	501	126;612	True;True	127;619	800;801;802;803;4511;4512;4513;4514;4515;4516	524;2727;2728;2729;2730;2731	524;2729			1	0.611146
sp|Q60817|NACA_MOUSE;sp|P70670|NACAM_MOUSE	sp|Q60817|NACA_MOUSE;sp|P70670|NACAM_MOUSE	2;2	2;2	2;2	>sp|Q61768|KINH_MOUSE Kinesin-1 heavy chain OS=Mus musculus GN=Kif5b PE=1 SV=3	3	6	6	6	5	4	5	4	5	4	8.2	8.2	8.2	109.55	963	963;956;1027	0	84.012	By MS/MS	By MS/MS	6.9	5.3	532180	318820	213360	384290	235080	7	4	11	358	667;897;1111;1478;1601;1755	True;True;True;True;True;True	674;905;1120;1493;1629;1786	4813;4814;4815;4816;6621;9151;9152;9153;11715;11716;13218;13219;14383;14384;14385;14386	2888;2889;3872;5337;5338;5339;6570;6571;7685;7686;8343	2889;3872;5337;6571;7686;8343			1	0.611726
sp|P80313|TCPH_MOUSE	sp|P80313|TCPH_MOUSE	3	3	3	>sp|O35129|PHB2_MOUSE Prohibitin-2 OS=Mus musculus GN=Phb2 PE=1 SV=1	1	3	3	3	3	2	3	2	3	2	11.7	11.7	11.7	33.296	299	299	0	24.379	By MS/MS	By MS/MS	11.7	8.4	1684300	1171900	512400	474730	294680	6	4	10	45	587;928;1149	True;True;True	594;936;1158	4319;4320;4321;4322;4323;6846;6847;6848;6849;6850;6851;6852;6853;6854;6855;6856;6857;6858;9414;9415;9416;9417;9418;9419;9420	2609;2610;4000;4001;4002;4003;5471;5472;5473;5474	2610;4001;5473			1	0.620732
sp|P80314|TCPB_MOUSE	sp|P80314|TCPB_MOUSE	3	3	3	>sp|P60843|IF4A1_MOUSE Eukaryotic initiation factor 4A-I OS=Mus musculus GN=Eif4a1 PE=1 SV=1;>sp|P10630|IF4A2_MOUSE Eukaryotic initiation factor 4A-II OS=Mus musculus GN=Eif4a2 PE=2 SV=2	2	6	6	6	5	6	5	6	5	6	17.2	17.2	17.2	46.153	406	406;407	0	63.282	By MS/MS	By MS/MS	14.8	17.2	6201000	3628500	2572500	4080700	2541500	20	17	37	215	477;785;963;1182;1294;1962	True;True;True;True;True;True	482;792;971;1192;1306;1996	3509;3510;3511;3512;3513;3514;3515;3516;5738;5739;5740;5741;5742;5743;5744;5745;7301;9616;9617;9618;9619;9620;9621;9622;9623;10373;10374;10375;10376;10377;10378;10379;10380;10381;10382;16088;16089;16090;16091;16092;16093;16094;16095;16096;16097;16098;16099;16100;16101;16102	2188;2189;2190;3407;3408;3409;3410;3411;3412;3413;3414;4298;5545;5546;5547;5548;5549;5881;5882;5883;5884;5885;5886;5887;5888;5889;5890;9322;9323;9324;9325;9326;9327;9328;9329;9330;9331;9332	2188;3410;4298;5548;5889;9325	160;161;162	149;178;187	1	0.62281
sp|P80315|TCPD_MOUSE	sp|P80315|TCPD_MOUSE	5	5	5	>sp|O35286|DHX15_MOUSE Pre-mRNA-splicing factor ATP-dependent RNA helicase DHX15 OS=Mus musculus GN=Dhx15 PE=1 SV=2	1	3	3	3	3	2	3	2	3	2	4.7	4.7	4.7	91.006	795	795	0	19.794	By MS/MS	By MS/MS	4.7	3	427730	295560	132170	297880	187890	3	2	5	49	535;1616;1746	True;True;True	540;1644;1776	3940;3941;3942;3943;3944;13338;13339;13340;13341;13342;13343;14292	2402;2403;7730;7731;8280	2402;7730;8280	48	494	1	0.630757
sp|P80316|TCPE_MOUSE	sp|P80316|TCPE_MOUSE	2	2	2	>sp|Q9ERK4|XPO2_MOUSE Exportin-2 OS=Mus musculus GN=Cse1l PE=2 SV=1	1	4	4	4	3	3	3	3	3	3	5.8	5.8	5.8	110.45	971	971	0	22.981	By MS/MS	By MS/MS	4.2	4.2	169860	137440	32421	116270	73578	2	2	4	562	195;1159;1383;1618	True;True;True;True	196;1169;1397;1646	1460;1461;1462;9488;10996;13346;13347;13348;13349	969;970;5492;6208;7734	970;5492;6208;7734	354;355;356	573;856;857	1	0.63282
sp|P80317|TCPZ_MOUSE	sp|P80317|TCPZ_MOUSE	2	2	2	>sp|P57776|EF1D_MOUSE Elongation factor 1-delta OS=Mus musculus GN=Eef1d PE=1 SV=3	1	8	8	8	8	7	8	7	8	7	37	37	37	31.293	281	281	0	323.31	By MS/MS	By MS/MS	37	34.5	30361000	16900000	13461000	10326000	6572000	40	33	73	205	275;289;611;784;917;1004;1560;1578	True;True;True;True;True;True;True;True	277;291;618;791;925;1012;1587;1606	2070;2071;2072;2073;2074;2075;2076;2077;2078;2079;2080;2180;2181;2182;2183;2184;2185;2186;2187;2188;2189;2190;2191;2192;2193;2194;2195;4504;4505;4506;4507;4508;4509;4510;5723;5724;5725;5726;5727;5728;5729;5730;5731;5732;5733;5734;5735;5736;5737;6762;6763;6764;6765;6766;6767;6768;6769;6770;6771;6772;6773;6774;6775;6776;6777;7606;12839;12840;12841;12842;12843;12844;12845;12846;12847;12848;12849;128…	1373;1451;1452;1453;1454;1455;1456;1457;1458;1459;1460;1461;1462;1463;1464;1465;2722;2723;2724;2725;2726;3396;3397;3398;3399;3400;3401;3402;3403;3404;3405;3406;3954;3955;3956;3957;3958;3959;3960;3961;3962;3963;3964;3965;3966;3967;3968;3969;4446;7439;7440;7441;7442;7443;7444;7445;7446;7555;7556;7557;7558;7559;7560;7561;7562;7563;7564;7565;7566;7567;7568;7569;7570	1373;1460;2726;3406;3959;4446;7446;7560	144;145	29;135	1	0.636452
sp|P80318|TCPG_MOUSE	sp|P80318|TCPG_MOUSE	2	2	2	>sp|P60867|RS20_MOUSE 40S ribosomal protein S20 OS=Mus musculus GN=Rps20 PE=1 SV=1	1	4	4	4	4	3	4	3	4	3	25.2	25.2	25.2	13.373	119	119	0	24.763	By MS/MS	By MS/MS	25.2	15.1	2017500	1294600	722930	686180	439890	8	1	9	216	91;404;1107;1813	True;True;True;True	92;407;1116;1845	587;588;589;590;2961;2962;2963;9123;9124;14920;14921;14922;14923;14924;14925;14926;14927;14928;14929;14930;14931	381;382;383;1912;5329;5330;8643;8644;8645;8646	382;1912;5330;8646			1	0.641071
sp|P83882|RL36A_MOUSE	sp|P83882|RL36A_MOUSE	4	4	4	>sp|Q8VHX6|FLNC_MOUSE Filamin-C OS=Mus musculus GN=Flnc PE=1 SV=3	1	15	11	11	15	11	11	8	11	8	7.5	5.6	5.6	291.12	2726	2726	0	113.06	By MS/MS	By MS/MS	7.5	5.8	1625800	1242900	382920	840270	538720	20	13	33	472	87;329;345;432;620;624;892;1106;1260;1625;1629;1732;1810;1821;1876	True;True;True;False;True;False;False;False;True;True;True;True;True;True;True	88;331;347;436;627;631;900;1115;1271;1653;1657;1762;1842;1854;1910	566;567;568;569;2481;2482;2570;2571;2572;3172;3173;3174;3175;4551;4552;4553;4573;4574;4575;6586;6587;6588;6589;6590;6591;6592;6593;6594;6595;9120;9121;9122;10192;10193;10194;10195;13376;13377;13378;13379;13380;13394;13395;13396;14209;14210;14211;14212;14908;14909;14985;14986;14987;15519;15520;15521;15522	371;372;1635;1691;1692;2024;2025;2026;2027;2755;2756;2757;2771;2772;2773;3854;3855;3856;3857;5328;5806;5807;5808;5809;7753;7754;7755;7756;7757;7758;7770;8231;8232;8233;8234;8235;8236;8639;8702;9020;9021;9022;9023;9024;9025	371;1635;1691;2024;2757;2772;3854;5328;5807;7756;7770;8235;8639;8702;9023			1	0.641127
sp|P84089|ERH_MOUSE	sp|P84089|ERH_MOUSE	1	1	1	>sp|Q8BP67|RL24_MOUSE 60S ribosomal protein L24 OS=Mus musculus GN=Rpl24 PE=1 SV=2	1	2	2	2	2	2	2	2	2	2	13.4	13.4	13.4	17.779	157	157	0	13.303	By MS/MS	By MS/MS	13.4	13.4	2764900	1595600	1169300	1045900	674020	5	4	9	426	140;1912	True;True	141;1946	882;883;884;885;886;887;888;889;890;891;892;15760;15761;15762;15763;15764;15765;15766;15767;15768	565;566;567;568;569;570;9147;9148;9149	566;9147	277	91	1	0.64444
sp|P84099|RL19_MOUSE	sp|P84099|RL19_MOUSE	3	3	3	>sp|P35700|PRDX1_MOUSE Peroxiredoxin-1 OS=Mus musculus GN=Prdx1 PE=1 SV=1	1	4	4	4	3	4	3	4	3	4	19.6	19.6	19.6	22.176	199	199	0	25.081	By MS/MS	By MS/MS	14.1	19.6	3106200	2176000	930230	1095700	710470	4	4	8	155	48;277;1249;1770	True;True;True;True	48;279;1260;1802	284;285;286;287;2094;10096;10097;10098;10099;14473;14474;14475;14476;14477;14478;14479;14480;14481;14482;14483	185;186;187;1380;5768;5769;5770;8399	185;1380;5768;8399	109	21	1	0.648417
sp|P97310|MCM2_MOUSE	sp|P97310|MCM2_MOUSE	5	5	5	>sp|P62984|RL40_MOUSE Ubiquitin-60S ribosomal protein L40 OS=Mus musculus GN=Uba52 PE=1 SV=2;>sp|P62983|RS27A_MOUSE Ubiquitin-40S ribosomal protein S27a OS=Mus musculus GN=Rps27a PE=1 SV=2;>sp|P0CG49|UBB_MOUSE Polyubiquitin-B OS=Mus musculus GN=Ubb PE=2 SV	4	5	5	5	5	5	5	5	5	5	38.3	38.3	38.3	14.728	128	128;156;305;734	0	87.435	By MS/MS	By MS/MS	38.3	38.3	38403000	21904000	16499000	16790000	11150000	26	17	43	91	146;522;885;1780;1794	True;True;True;True;True	147;527;893;1812;1826	942;943;944;945;3845;3846;3847;3848;3849;3850;3851;3852;3853;3854;3855;3856;3857;3858;3859;3860;6537;6538;6539;6540;6541;6542;6543;6544;6545;6546;6547;6548;6549;6550;6551;6552;6553;6554;6555;6556;6557;6558;6559;14548;14549;14550;14551;14552;14553;14554;14555;14556;14557;14558;14559;14560;14561;14562;14563;14564;14565;14566;14567;14568;14569;14570;14571;14572;14573;14574;14575;14576;14577;14578;14…	603;2345;2346;2347;2348;3844;3845;3846;8423;8424;8425;8426;8427;8428;8429;8430;8431;8432;8433;8434;8435;8436;8437;8438;8439;8440;8441;8442;8443;8444;8445;8446;8447;8448;8449;8450;8533;8534;8535;8536;8537;8538;8539;8540;8541	603;2348;3846;8446;8536			1	0.664086
sp|P97311|MCM6_MOUSE	sp|P97311|MCM6_MOUSE	3	3	3	>sp|P17225|PTBP1_MOUSE Polypyrimidine tract-binding protein 1 OS=Mus musculus GN=Ptbp1 PE=1 SV=2;>sp|Q8BHD7|PTBP3_MOUSE Polypyrimidine tract-binding protein 3 OS=Mus musculus GN=Ptbp3 PE=2 SV=1	2	2	2	2	2	2	2	2	2	2	4.6	4.6	4.6	56.477	527	527;523	0	12.565	By MS/MS	By MS/MS	4.6	4.6	754260	516180	238080	510970	348430	6	4	10	118	453;1279	True;True	457;1290	3298;3299;3300;3301;3302;3303;10282;10283;10284;10285;10286;10287;10288;10289	2083;2084;5836;5837;5838;5839;5840;5841;5842;5843	2083;5841	88	1	1	0.681899
sp|P97315|CSRP1_MOUSE	sp|P97315|CSRP1_MOUSE	1	1	1	>sp|P43277|H13_MOUSE Histone H1.3 OS=Mus musculus GN=Hist1h1d PE=1 SV=2	1	31	31	6	27	30	27	30	5	5	57	57	14	22.099	221	221	0	323.31	By MS/MS	By MS/MS	56.1	56.6	17027000000	12320000000	4706900000	3487100000	2392100000	324	257	581	173	34;147;156;157;248;518;519;749;750;751;757;758;759;760;937;946;949;950;955;956;998;1016;1459;1519;1520;1521;1522;1548;1549;1609;1754	True;True;True;True;True;True;True;True;True;True;True;True;True;True;True;True;True;True;True;True;True;True;True;True;True;True;True;True;True;True;True	34;148;157;158;249;523;524;756;757;758;764;765;766;767;945;954;957;958;963;964;1006;1024;1474;1540;1541;1542;1543;1544;1545;1546;1575;1576;1637;1785	192;193;194;195;196;197;198;199;200;201;202;203;204;946;947;948;949;950;951;952;953;954;955;956;957;958;959;1058;1059;1060;1061;1062;1063;1064;1065;1066;1067;1068;1069;1070;1071;1072;1073;1074;1075;1076;1077;1078;1079;1080;1081;1082;1083;1084;1085;1086;1087;1088;1089;1090;1091;1092;1093;1094;1095;1096;1097;1098;1099;1100;1101;1102;1103;1104;1105;1106;1107;1108;1109;1110;1111;1112;1113;1114;1115;1…	133;134;135;604;605;606;655;656;657;658;659;660;661;662;663;664;665;666;667;668;669;670;671;672;673;674;675;676;677;678;679;680;681;682;683;684;685;686;687;688;689;690;691;692;693;694;695;696;697;698;699;700;701;702;703;704;705;706;707;708;709;710;711;712;713;714;715;716;717;718;719;720;721;722;723;724;725;726;727;728;729;730;731;732;733;734;735;736;737;738;739;740;741;742;743;744;745;746;747;748…	134;604;690;747;1220;2314;2325;3219;3243;3249;3292;3296;3298;3299;4056;4069;4077;4104;4229;4243;4419;4491;6472;6974;7081;7106;7109;7353;7401;7710;8341			1	0.685985
sp|P97351|RS3A_MOUSE	sp|P97351|RS3A_MOUSE	6	6	6	>sp|Q61879|MYH10_MOUSE Myosin-10 OS=Mus musculus GN=Myh10 PE=1 SV=2	1	7	4	3	7	7	4	4	3	3	3.7	2.7	2.2	228.99	1976	1976	0	34.555	By MS/MS	By MS/MS	3.7	3.7	731790	477890	253910	496460	341290	8	8	16	360	175;481;561;839;967;1066;1832	True;True;False;True;False;False;True	176;486;568;846;975;1075;1865	1338;1339;1340;1341;3532;3533;3534;3535;3536;4129;4130;4131;4132;4133;6159;6160;6161;6162;6163;6164;7316;7317;7318;7319;7320;7321;7322;7323;8179;8180;8181;8182;15045;15046;15047;15048;15049;15050;15051	893;2205;2206;2207;2499;2500;2501;2502;3626;3627;3628;4306;4307;4709;8719;8720;8721;8722;8723;8724;8725;8726;8727	893;2207;2499;3626;4306;4709;8725			1	0.687447
sp|P97447|FHL1_MOUSE	sp|P97447|FHL1_MOUSE	1	1	1	>sp|Q9CPY7|AMPL_MOUSE Cytosol aminopeptidase OS=Mus musculus GN=Lap3 PE=1 SV=3	1	3	3	3	3	3	3	3	3	3	6.9	6.9	6.9	56.141	519	519	0	19.901	By MS/MS	By MS/MS	6.9	6.9	417390	278040	139350	281520	195900	7	3	10	509	686;772;1778	True;True;True	693;779;1810	4970;4971;4972;5640;5641;5642;5643;5644;14536;14537;14538;14539;14540;14541;14542	2982;3352;3353;3354;3355;8417;8418;8419;8420;8421	2982;3354;8419			1	0.695865
sp|P97823|LYPA1_MOUSE	sp|P97823|LYPA1_MOUSE	2	2	2	>sp|P11499|HS90B_MOUSE Heat shock protein HSP 90-beta OS=Mus musculus GN=Hsp90ab1 PE=1 SV=3	1	13	13	8	13	13	13	13	8	8	20.6	20.6	13.8	83.28	724	724	0	231.26	By MS/MS	By MS/MS	20.6	20.6	16728000	10030000	6698100	10633000	7465500	24	28	52	100	54;60;489;490;494;513;782;794;1098;1564;1797;2068;2071	True;True;True;True;True;True;True;True;True;True;True;True;True	54;60;494;495;499;518;789;801;1107;1591;1829;2104;2107	311;312;313;314;315;316;317;318;335;336;337;338;339;340;341;342;343;344;345;346;347;348;3560;3561;3562;3563;3564;3565;3566;3567;3568;3569;3570;3580;3581;3582;3583;3584;3585;3586;3587;3588;3705;3706;3707;3708;3709;3710;3711;3712;5711;5712;5713;5714;5825;5826;5827;9072;9073;9074;9075;9076;9077;9078;9079;12870;12871;12872;12873;12874;14725;14726;14727;14728;14729;14730;14731;14732;14733;14734;14735;…	199;211;212;213;214;215;216;217;218;2224;2225;2226;2237;2282;2283;2284;2285;2286;2287;3385;3386;3387;3388;3449;5308;5309;7457;7458;7459;7460;7461;8544;8545;8546;8547;8548;8549;8550;8551;8552;8553;8554;9789;9790;9799;9800;9801;9802;9803;9804;9805;9806	199;215;2224;2225;2237;2282;3385;3449;5309;7457;8545;9790;9801	76;77	93;466	1	0.702107
sp|P97855|G3BP1_MOUSE	sp|P97855|G3BP1_MOUSE	1	1	1	>sp|P23198|CBX3_MOUSE Chromobox protein homolog 3 OS=Mus musculus GN=Cbx3 PE=1 SV=2	2	5	5	5	4	3	4	3	4	3	27.9	27.9	27.9	20.855	183	183;185	0	59.683	By MS/MS	By MS/MS	23	21.3	345210	268960	76252	109450	77217	9	5	14	131	265;847;1023;1242;1898	True;True;True;True;True	267;854;1031;1253;1932	2017;6247;6248;6249;6250;6251;6252;7815;7816;7817;7818;10034;15661	1352;3671;3672;3673;3674;3675;3676;3677;4560;4561;4562;4563;5733;9097	1352;3675;4561;5733;9097	97;98	137;140	1	0.7055
sp|P99024|TBB5_MOUSE;sp|Q9CWF2|TBB2B_MOUSE;sp|Q7TMM9|TBB2A_MOUSE;sp|A2AQ07|TBB1_MOUSE;CON__ENSEMBL:ENSBTAP00000025008	sp|P99024|TBB5_MOUSE;sp|Q9CWF2|TBB2B_MOUSE;sp|Q7TMM9|TBB2A_MOUSE	8;4;4;1;1	8;4;4;1;1	2;0;0;0;0	>sp|P62830|RL23_MOUSE 60S ribosomal protein L23 OS=Mus musculus GN=Rpl23 PE=1 SV=1	1	3	3	3	3	3	3	3	3	3	20	20	20	14.865	140	140	0	21.246	By MS/MS	By MS/MS	20	20	1475900	917170	558740	499290	353850	7	4	11	246	732;1173;1174	True;True;True	739;1183;1184	5247;5248;5249;5250;5251;5252;5253;5254;5255;5256;9558;9559;9560;9561;9562;9563;9564;9565	3120;3121;5524;5525;5526;5527;5528;5529;5530;5531;5532	3121;5526;5530	172;173	60;62	1	0.708706
sp|Q01149|CO1A2_MOUSE	sp|Q01149|CO1A2_MOUSE	3	3	3	>sp|P27773|PDIA3_MOUSE Protein disulfide-isomerase A3 OS=Mus musculus GN=Pdia3 PE=1 SV=2	1	4	4	4	4	3	4	3	4	3	10.1	10.1	10.1	56.678	505	505	0	23.051	By MS/MS	By MS/MS	10.1	7.7	1935000	1104600	830440	1294900	919030	6	3	9	144	382;1050;1276;1514	True;True;True;True	385;1058;1287;1532	2830;8045;8046;8047;8048;8049;8050;8051;8052;8053;8054;10277;10278;10279;12036;12037;12038;12039;12040;12041;12042;12043	1846;4660;4661;4662;4663;4664;5832;5833;6800	1846;4664;5832;6800	106	434	1	0.70973
sp|Q01231|CXA5_MOUSE	sp|Q01231|CXA5_MOUSE	1	1	1	>sp|P16858|G3P_MOUSE Glyceraldehyde-3-phosphate dehydrogenase OS=Mus musculus GN=Gapdh PE=1 SV=2	1	5	5	4	5	5	5	5	4	4	19.8	19.8	15.6	35.81	333	333	0	65.435	By MS/MS	By MS/MS	19.8	19.8	31535000	19012000	12523000	11420000	8109100	30	24	54	115	613;929;1929;1999;2037	True;True;True;True;True	620;937;1963;2034;2072;2073	4517;4518;4519;4520;4521;4522;4523;4524;4525;4526;4527;4528;4529;4530;4531;4532;6859;6860;6861;6862;6863;6864;6865;6866;6867;6868;6869;6870;6871;6872;6873;6874;6875;6876;6877;6878;6879;6880;6881;6882;6883;6884;6885;15889;15890;15891;15892;15893;15894;15895;15896;15897;15898;15899;15900;15901;16351;16352;16353;16354;16355;16356;16357;16358;16359;16360;16361;16362;16363;16364;16632;16633;16634;1663…	2732;2733;2734;2735;2736;2737;2738;4004;4005;4006;4007;4008;4009;4010;4011;4012;4013;4014;4015;4016;4017;4018;4019;4020;4021;4022;4023;4024;4025;9218;9454;9455;9456;9457;9458;9459;9460;9636;9637;9638;9639;9640;9641;9642;9643;9644;9645;9646;9647;9648;9649;9650;9651;9652;9653	2733;4005;9218;9460;9649	84;85	326;329	1	0.710079
sp|Q01320|TOP2A_MOUSE	sp|Q01320|TOP2A_MOUSE	5	5	3	>sp|P59999|ARPC4_MOUSE Actin-related protein 2/3 complex subunit 4 OS=Mus musculus GN=Arpc4 PE=1 SV=3	1	3	3	3	3	3	3	3	3	3	18.5	18.5	18.5	19.667	168	168	0	18.5	By MS/MS	By MS/MS	18.5	18.5	712330	430000	282330	215810	153920	3	2	5	210	78;498;1714	True;True;True	79;503;1744	504;505;506;507;3628;3629;3630;3631;14109;14110;14111;14112	308;309;2250;8180;8181	308;2250;8181			1	0.71322
sp|Q01768|NDKB_MOUSE;sp|P15532|NDKA_MOUSE	sp|Q01768|NDKB_MOUSE;sp|P15532|NDKA_MOUSE	2;1	2;1	2;1	>sp|Q8BGQ7|SYAC_MOUSE Alanine--tRNA ligase, cytoplasmic OS=Mus musculus GN=Aars PE=1 SV=1	1	3	3	3	3	2	3	2	3	2	3.6	3.6	3.6	106.91	968	968	0	18.225	By MS/MS	By MS/MS	3.6	2.2	561740	375030	186710	366890	264220	3	1	4	416	695;908;921	True;True;True	702;916;929	5016;5017;5018;5019;5020;6719;6720;6794;6795;6796;6797	3013;3937;3938;3981	3013;3938;3981			1	0.720161
sp|Q01853|TERA_MOUSE	sp|Q01853|TERA_MOUSE	6	6	6	>sp|P80318|TCPG_MOUSE T-complex protein 1 subunit gamma OS=Mus musculus GN=Cct3 PE=1 SV=1	1	2	2	2	2	2	2	2	2	2	4	4	4	60.629	545	545	0	13.161	By MS/MS	By MS/MS	4	4	872700	552170	320540	570780	415290	5	3	8	283	302;923	True;True	304;931	2267;2268;2269;2270;2271;2272;2273;2274;2275;2276;2277;6805;6806;6807;6808;6809;6810	1507;1508;1509;1510;1511;1512;1513;3984	1507;3984			1	0.727583
sp|Q02053|UBA1_MOUSE	sp|Q02053|UBA1_MOUSE	5	5	5	>sp|P68040|GBLP_MOUSE Guanine nucleotide-binding protein subunit beta-2-like 1 OS=Mus musculus GN=Gnb2l1 PE=1 SV=3	1	5	5	5	5	4	5	4	5	4	17	17	17	35.076	317	317	0	82.686	By MS/MS	By MS/MS	17	14.2	7729500	5208700	2520800	3043100	2233200	21	13	34	267	362;415;858;1259;1751	True;True;True;True;True	365;418;865;1270;1782	2712;2713;2714;2715;2716;2717;2718;2719;2720;2721;2722;2723;2724;2725;3023;3024;3025;3026;3027;3028;3029;3030;3031;3032;3033;3034;3035;3036;3037;3038;6317;6318;6319;6320;6321;6322;6323;6324;6325;6326;6327;6328;6329;6330;6331;6332;6333;6334;6335;6336;6337;6338;6339;6340;6341;6342;6343;10190;10191;14358;14359;14360;14361;14362;14363;14364;14365;14366;14367;14368	1799;1800;1801;1802;1803;1804;1944;1945;1946;1947;1948;1949;1950;1951;1952;1953;1954;3725;3726;3727;3728;3729;3730;3731;3732;3733;3734;3735;5804;5805;8332;8333;8334;8335	1801;1945;3729;5804;8332	188	5	1	0.733857
sp|Q02257|PLAK_MOUSE	sp|Q02257|PLAK_MOUSE	6	6	6	>sp|P62862|RS30_MOUSE 40S ribosomal protein S30 OS=Mus musculus GN=Fau PE=1 SV=1	1	4	4	4	4	4	4	4	4	4	33.9	33.9	33.9	6.6478	59	59	0	26.401	By MS/MS	By MS/MS	33.9	33.9	552290000	360120000	192170000	164370000	120820000	24	14	38	249	606;607;1027;1457	True;True;True;True	613;614;1035;1472	4445;4446;4447;4448;4449;4450;4451;4452;4453;4454;4455;4456;4457;4458;4459;4460;4461;4462;4463;4464;4465;4466;4467;4468;4469;4470;4471;4472;4473;4474;4475;4476;4477;4478;4479;4480;4481;4482;4483;4484;4485;4486;4487;7846;7847;7848;7849;7850;7851;7852;7853;7854;7855;7856;11492;11493;11494;11495;11496;11497;11498;11499;11500;11501;11502;11503;11504;11505	2682;2683;2684;2685;2686;2687;2688;2689;2690;2691;2692;2693;2694;2695;2696;2697;2698;2699;2700;2701;2702;2703;2704;2705;2706;2707;2708;2709;2710;2711;2712;2713;4571;4572;4573;4574;6464;6465;6466;6467;6468	2682;2707;4574;6468			1	0.735049
sp|Q03265|ATPA_MOUSE	sp|Q03265|ATPA_MOUSE	7	7	7	>sp|P19096|FAS_MOUSE Fatty acid synthase OS=Mus musculus GN=Fasn PE=1 SV=2	1	8	8	8	8	6	8	6	8	6	3.6	3.6	3.6	272.43	2504	2504	0	88.589	By MS/MS	By MS/MS	3.6	2.7	935400	634420	300980	604890	446710	10	5	15	124	46;591;769;1728;1764;1954;2002;2016	True;True;True;True;True;True;True;True	46;598;776;1758;1796;1988;2037;2051	275;276;277;278;4335;4336;4337;5618;5619;14178;14179;14431;14432;14433;14434;16038;16039;16040;16041;16382;16383;16384;16385;16386;16387;16448;16449;16450;16451	176;177;178;179;2619;2620;2621;3328;3329;8214;8371;9287;9475;9476;9518;9519	178;2620;3328;8214;8371;9287;9475;9518			1	0.738498
sp|Q04750|TOP1_MOUSE	sp|Q04750|TOP1_MOUSE	6	6	6	>sp|P52480|KPYM_MOUSE Pyruvate kinase PKM OS=Mus musculus GN=Pkm PE=1 SV=4	2	13	13	13	11	12	11	12	11	12	28.4	28.4	28.4	57.844	531	531;574	0	105.76	By MS/MS	By MS/MS	24.1	25.2	12211000	7295300	4916000	7901000	5845700	32	22	54	193	104;614;641;645;736;737;774;821;933;1063;1319;1415;1456	True;True;True;True;True;True;True;True;True;True;True;True;True	105;621;648;652;743;744;781;828;941;1072;1332;1430;1471	662;663;664;665;666;667;668;669;670;4533;4534;4535;4536;4537;4538;4661;4662;4663;4664;4665;4666;4667;4668;4669;4670;4671;4672;4673;4674;4683;4684;4685;4686;5288;5289;5290;5291;5292;5293;5294;5295;5296;5297;5298;5299;5300;5301;5302;5303;5656;5657;5658;5659;6042;6043;6044;6045;6046;6047;6048;6049;6908;6909;6910;6911;6912;6913;8152;8153;8154;8155;8156;8157;8158;8159;8160;10496;11185;11186;11187;1118…	432;433;2739;2740;2741;2742;2743;2744;2745;2815;2816;2817;2818;2824;2825;3145;3146;3147;3148;3149;3150;3151;3360;3361;3560;4036;4037;4038;4039;4692;4693;4694;4695;4696;4697;4698;4699;4700;5944;6322;6323;6324;6325;6326;6327;6328;6329;6330;6331;6332;6333;6334;6335;6463	432;2745;2817;2825;3145;3146;3360;3560;4039;4697;5944;6332;6463	129;130;131;132	291;330;334;377	1	0.739868
sp|Q05920|PYC_MOUSE	sp|Q05920|PYC_MOUSE	9	9	9	>sp|Q8CGP6|H2A1H_MOUSE Histone H2A type 1-H OS=Mus musculus GN=Hist1h2ah PE=1 SV=3;>sp|Q8R1M2|H2AJ_MOUSE Histone H2A.J OS=Mus musculus GN=H2afj PE=1 SV=1;>sp|Q8CGP7|H2A1K_MOUSE Histone H2A type 1-K OS=Mus musculus GN=Hist1h2ak PE=1 SV=3;>sp|Q8CGP5|H2A1F_MO	8	5	5	1	4	5	4	5	1	1	36.7	36.7	8.6	13.95	128	128;129;130;130;130;130;143;130	0	231.74	By MS/MS	By MS/MS	35.9	36.7	172410000	93104000	79307000	56073000	42212000	33	24	57	129	109;796;1353;2027;2028	True;True;True;True;True	110;803;1367;2062;2063	694;695;696;697;698;699;700;701;702;703;704;705;706;707;708;709;710;711;712;713;5832;5833;5834;5835;5836;5837;5838;5839;5840;5841;5842;10708;10709;10710;10711;10712;10713;10714;10715;10716;10717;10718;10719;10720;10721;10722;10723;10724;10725;10726;10727;10728;10729;10730;10731;10732;10733;10734;10735;16533;16534;16535;16536;16537;16538;16539;16540;16541;16542;16543;16544;16545;16546;16547;16548;…	450;451;452;453;454;455;456;457;458;459;460;461;462;463;464;465;466;467;3452;3453;3454;3455;3456;3457;3458;3459;3460;3461;6077;6078;6079;6080;6081;6082;6083;6084;9569;9570;9571;9572;9573;9574;9575;9576;9577;9578;9579;9580;9581;9582;9583;9584;9585;9586;9587;9588;9589	464;3457;6083;9586;9589			1	0.752804
sp|Q05CL8|LARP7_MOUSE	sp|Q05CL8|LARP7_MOUSE	1	1	1	>sp|P62259|1433E_MOUSE 14-3-3 protein epsilon OS=Mus musculus GN=Ywhae PE=1 SV=1	1	3	3	3	3	2	3	2	3	2	14.1	14.1	14.1	29.174	255	255	0	22.654	By MS/MS	By matching	14.1	9.4	1257300	941560	315730	271920	204910	4	0	4	229	425;1277;1861	True;True;True	429;1288;1895	3122;3123;3124;3125;3126;3127;3128;3129;10280;15284;15285;15286;15287;15288;15289	2001;2002;5834;8837;8838	2002;5834;8838	165;166	1;33	1	0.753567
sp|Q06185|ATP5I_MOUSE	sp|Q06185|ATP5I_MOUSE	2	2	2	>sp|Q9WVA4|TAGL2_MOUSE Transgelin-2 OS=Mus musculus GN=Tagln2 PE=1 SV=4;>sp|Q9R1Q8|TAGL3_MOUSE Transgelin-3 OS=Mus musculus GN=Tagln3 PE=1 SV=1	2	4	4	4	4	4	4	4	4	4	18.1	18.1	18.1	22.395	199	199;199	0	25.513	By MS/MS	By MS/MS	18.1	18.1	1014600	604750	409840	320100	242190	5	3	8	591	207;630;722;1360	True;True;True;True	208;637;729;1374	1553;1554;1555;1556;4598;4599;4600;4601;5178;5179;5180;5181;10782;10783;10784;10785;10786;10787	1048;2784;2785;2786;2787;3086;6121;6122	1048;2786;3086;6121	371;372	189;194	1	0.756607
sp|Q08943|SSRP1_MOUSE	sp|Q08943|SSRP1_MOUSE	3	3	3	>sp|Q64511|TOP2B_MOUSE DNA topoisomerase 2-beta OS=Mus musculus GN=Top2b PE=1 SV=2	1	4	2	2	4	4	2	2	2	2	3	1.5	1.5	181.91	1612	1612	0	24.599	By MS/MS	By MS/MS	3	3	227320	126680	100640	146830	111230	4	1	5	374	487;828;1143;1579	False;False;True;True	492;835;1152;1607	3555;3556;3557;6074;6075;6076;6077;9383;9384;9385;9386;13064;13065;13066;13067;13068	2220;2221;3580;3581;5460;7571;7572;7573;7574	2221;3580;5460;7573			1	0.757543
sp|Q3TEA8|HP1B3_MOUSE	sp|Q3TEA8|HP1B3_MOUSE	3	3	3	>sp|Q80WJ7|LYRIC_MOUSE Protein LYRIC OS=Mus musculus GN=Mtdh PE=1 SV=1	1	4	4	4	4	2	4	2	4	2	9	9	9	63.845	579	579	0	34.078	By MS/MS	By matching	9	4.3	665910	445980	219940	405920	309070	7	0	7	409	1700;1744;1802;1838	True;True;True;True	1729;1774;1834;1871	13976;14283;14284;14285;14286;14287;14809;14810;14811;14812;14813;14814;14815;14816;15097;15098	8104;8274;8275;8276;8591;8739;8740	8104;8274;8591;8740	270	490	1	0.761406
sp|Q3THK3|T2FA_MOUSE	sp|Q3THK3|T2FA_MOUSE	1	1	1	>sp|Q68FL6|SYMC_MOUSE Methionine--tRNA ligase, cytoplasmic OS=Mus musculus GN=Mars PE=2 SV=1	1	2	2	2	2	2	2	2	2	2	2	2	2	101.43	902	902	0	18.649	By MS/MS	By MS/MS	2	2	269100	139880	129230	176620	136680	4	3	7	378	915;1077	True;True	923;1086	6753;6754;6755;6756;8257;8258;8259;8260	3949;3950;4744;4745;4746;4747;4748	3949;4744			1	0.773865
sp|Q3THK7|GUAA_MOUSE	sp|Q3THK7|GUAA_MOUSE	2	2	2	>sp|P27046|MA2A1_MOUSE Alpha-mannosidase 2 OS=Mus musculus GN=Man2a1 PE=1 SV=2	1	2	2	2	2	2	2	2	2	2	1.9	1.9	1.9	131.63	1150	1150	0	11.979	By MS/MS	By matching	1.9	1.9	100650	62589	38062	64668	50399	4	0	4	142	16;849	True;True	16;856	75;76;77;6255;6256;6257;6258	61;3679;3680;3681	61;3680			1	0.77935
sp|Q3TIV5|ZC3HF_MOUSE	sp|Q3TIV5|ZC3HF_MOUSE	1	1	1	>sp|P62908|RS3_MOUSE 40S ribosomal protein S3 OS=Mus musculus GN=Rps3 PE=1 SV=1	1	8	8	8	8	8	8	8	8	8	36.6	36.6	36.6	26.674	243	243	0	73.842	By MS/MS	By MS/MS	36.6	36.6	9676200	5959600	3716600	2732100	2132400	23	19	42	251	76;318;473;566;634;670;693;1742	True;True;True;True;True;True;True;True	77;320;478;573;641;677;700;1772	484;485;486;487;488;489;490;491;492;493;494;495;496;2403;2404;2405;2406;2407;2408;2409;3480;3481;3482;3483;3484;3485;3486;3487;3488;3489;3490;3491;3492;3493;3494;4166;4167;4168;4169;4170;4622;4623;4624;4625;4626;4627;4628;4629;4630;4631;4632;4633;4634;4635;4827;4828;4829;4830;4831;4832;4833;4834;4835;4836;4999;5000;5001;5002;5003;5004;5005;5006;5007;5008;5009;5010;5011;14265;14266;14267;14268;142…	300;301;302;303;304;1586;2167;2168;2169;2170;2171;2172;2173;2174;2175;2176;2177;2178;2179;2180;2181;2510;2511;2512;2795;2796;2898;2899;2998;2999;3000;3001;3002;3003;3004;3005;3006;3007;3008;3009;3010;8266;8267;8268	304;1586;2172;2512;2796;2899;3002;8267	176	236	1	0.780499
sp|Q3TW96|UAP1L_MOUSE;sp|Q91YN5|UAP1_MOUSE	sp|Q3TW96|UAP1L_MOUSE;sp|Q91YN5|UAP1_MOUSE	2;1	2;1	2;1	>sp|P10126|EF1A1_MOUSE Elongation factor 1-alpha 1 OS=Mus musculus GN=Eef1a1 PE=1 SV=3;>sp|P62631|EF1A2_MOUSE Elongation factor 1-alpha 2 OS=Mus musculus GN=Eef1a2 PE=1 SV=1	2	9	9	9	9	9	9	9	9	9	24	24	24	50.113	462	462;463	0	58.946	By MS/MS	By MS/MS	24	24	56873000	31004000	25868000	33789000	26624000	30	22	52	93	454;834;1283;1450;1682;1769;1771;1903;2105	True;True;True;True;True;True;True;True;True	458;841;1294;1295;1465;1711;1801;1803;1937;2143	3304;3305;3306;3307;3308;3309;3310;3311;3312;3313;3314;3315;3316;3317;3318;3319;3320;3321;3322;3323;3324;3325;3326;6116;6117;6118;6119;6120;6121;6122;6123;6124;6125;6126;6127;6128;6129;6130;6131;10310;10311;10312;10313;10314;10315;10316;10317;10318;10319;10320;10321;10322;10323;10324;10325;10326;11432;11433;11434;11435;11436;11437;11438;11439;11440;11441;11442;11443;13855;13856;13857;13858;13859;…	2085;2086;2087;2088;2089;2090;2091;2092;2093;2094;2095;2096;2097;2098;2099;3607;3608;3609;3610;3611;3612;3613;3614;3615;3616;3617;5857;5858;5859;5860;6439;6440;6441;8022;8023;8393;8394;8395;8396;8397;8398;8400;9113;9114;9115;9116;9981;9982;9983;9984;9985;9986;9987	2098;3617;5858;6441;8022;8397;8400;9113;9982	69;70	155;276	1	0.787949
sp|Q3U0V1|FUBP2_MOUSE	sp|Q3U0V1|FUBP2_MOUSE	3	3	3	>sp|P62264|RS14_MOUSE 40S ribosomal protein S14 OS=Mus musculus GN=Rps14 PE=2 SV=3	1	2	2	2	2	2	2	2	2	2	15.9	15.9	15.9	16.273	151	151	0	12.474	By MS/MS	By MS/MS	15.9	15.9	2003400	1189400	814020	661610	524370	2	3	5	230	818;1811	True;True	825;1843	6012;6013;6014;6015;6016;6017;6018;6019;14910;14911;14912;14913;14914;14915;14916;14917;14918	3544;3545;3546;8640;8641	3546;8641			1	0.792567
sp|Q3U3V8|XRRA1_MOUSE	sp|Q3U3V8|XRRA1_MOUSE	1	1	1	>sp|Q01853|TERA_MOUSE Transitional endoplasmic reticulum ATPase OS=Mus musculus GN=Vcp PE=1 SV=4	1	6	6	6	6	4	6	4	6	4	10.5	10.5	10.5	89.321	806	806	0	36.724	By MS/MS	By MS/MS	10.5	7.1	1107000	679780	427260	682600	543530	14	6	20	300	247;672;1067;1091;1114;1693	True;True;True;True;True;True	248;679;1076;1100;1123;1722	1826;1827;1828;1829;1830;1831;1832;1833;1834;1835;1836;4846;4847;8183;8184;8185;8186;8332;8333;8334;8335;8336;8337;8338;8339;9171;13934	1207;1208;1209;1210;1211;1212;1213;1214;1215;2905;2906;4710;4711;4786;4787;4788;4789;4790;5342;8065	1213;2906;4710;4790;5342;8065			1	0.796264
sp|Q3UBX0|TM109_MOUSE	sp|Q3UBX0|TM109_MOUSE	1	1	1	>sp|Q9Z1Q9|SYVC_MOUSE Valine--tRNA ligase OS=Mus musculus GN=Vars PE=2 SV=1	1	14	14	14	14	14	14	14	14	14	13.9	13.9	13.9	140.21	1263	1263	0	108.9	By MS/MS	By MS/MS	13.9	13.9	10553000	6149600	4402900	6690300	5329000	31	23	54	597	51;313;567;713;824;913;1021;1187;1207;1557;1698;1996;1997;2003	True;True;True;True;True;True;True;True;True;True;True;True;True;True	51;315;574;720;831;921;1029;1197;1217;1584;1727;2031;2032;2038	294;295;296;297;2372;2373;2374;2375;2376;2377;2378;2379;2380;4171;4172;4173;4174;5120;5121;5122;5123;5124;5125;5126;5127;6054;6055;6056;6057;6741;6742;6743;6744;6745;6746;7807;7808;7809;7810;9651;9652;9653;9654;9780;9781;9782;9783;9784;9785;12826;12827;13963;13964;13965;13966;13967;13968;13969;13970;16337;16338;16339;16340;16341;16342;16343;16344;16345;16346;16347;16388;16389;16390;16391;16392;16…	194;1570;1571;1572;1573;1574;1575;2513;2514;2515;3061;3062;3063;3064;3565;3566;3567;3568;3946;4556;4557;5569;5570;5628;5629;5630;7431;7432;8093;8094;8095;8096;8097;8098;8099;8100;8101;8102;9444;9445;9446;9447;9448;9449;9450;9451;9477;9478;9479;9480;9481;9482;9483;9484;9485	194;1571;2515;3063;3568;3946;4557;5569;5630;7431;8100;9450;9451;9485	373	540	1	0.796526
sp|Q9D3R6|KATL2_MOUSE;sp|Q3UMC0|SPAT5_MOUSE	sp|Q9D3R6|KATL2_MOUSE;sp|Q3UMC0|SPAT5_MOUSE	1;1	1;1	1;1	>sp|Q80X90|FLNB_MOUSE Filamin-B OS=Mus musculus GN=Flnb PE=1 SV=3	1	20	18	16	19	17	17	16	15	14	10.8	10.1	8.8	277.82	2602	2602	0	134.68	By MS/MS	By MS/MS	10.2	9.3	3202000	1983400	1218500	1996800	1596600	25	16	41	410	351;432;551;621;624;838;862;892;1106;1254;1413;1536;1624;1626;1628;1661;1759;1879;1959;2046	True;True;True;True;True;True;True;False;False;True;True;True;True;True;True;True;True;True;True;True	353;436;558;628;631;845;869;900;1115;1265;1427;1563;1652;1654;1656;1689;1790;1913;1993;2082	2612;2613;3172;3173;3174;3175;4059;4060;4061;4062;4063;4554;4555;4556;4557;4558;4573;4574;4575;6154;6155;6156;6157;6158;6379;6586;6587;6588;6589;6590;6591;6592;6593;6594;6595;9120;9121;9122;10129;10130;10131;10132;10133;10134;10135;10136;10137;11176;11177;11178;11179;11180;12620;12621;12622;13372;13373;13374;13375;13381;13382;13391;13392;13393;13642;14409;14410;14411;14412;14413;14414;14415;14416…	1716;2024;2025;2026;2027;2462;2463;2758;2771;2772;2773;3623;3624;3625;3743;3854;3855;3856;3857;5328;5785;5786;5787;5788;5789;5790;6318;7308;7752;7759;7760;7768;7769;7901;8355;8356;8357;8358;8359;9030;9031;9032;9316;9317;9318;9678	1716;2024;2463;2758;2772;3624;3743;3854;5328;5789;6318;7308;7752;7759;7769;7901;8359;9031;9318;9678	271;272	549;696	1	0.799579
sp|Q3UPL0|SC31A_MOUSE	sp|Q3UPL0|SC31A_MOUSE	1	1	1	>sp|Q7TPR4|ACTN1_MOUSE Alpha-actinin-1 OS=Mus musculus GN=Actn1 PE=1 SV=1	3	6	3	3	6	5	3	3	3	3	9.5	5.2	5.2	103.07	892	892;894;900	0	18.931	By MS/MS	By MS/MS	9.5	8.1	689080	420980	268100	442520	353930	3	3	6	402	523;556;811;1217;1303;1777	True;False;True;False;True;False	528;563;818;1227;1316;1809	3861;3862;3863;3864;4099;4100;4101;4102;4103;4104;4105;4106;5968;5969;5970;9851;10438;10439;10440;10441;10442;10443;10444;10445;14529;14530;14531;14532;14533;14534;14535	2349;2350;2351;2484;2485;2486;2487;2488;3509;3510;5662;5912;8412;8413;8414;8415;8416	2349;2486;3509;5662;5912;8412	146;263;264	221;354;830	1	0.799806
sp|Q3UV17|K22O_MOUSE;CON__Q8N1N4-2;CON__Q7RTT2	sp|Q3UV17|K22O_MOUSE	11;4;4	1;0;0	1;0;0	>sp|P63017|HSP7C_MOUSE Heat shock cognate 71 kDa protein OS=Mus musculus GN=Hspa8 PE=1 SV=1	2	20	20	16	20	19	20	19	16	15	33.4	33.4	28.3	70.87	646	646;633	0	203.04	By MS/MS	By MS/MS	33.4	32	23046000	13927000	9119000	14448000	11576000	50	35	85	257	348;562;756;851;852;910;1154;1302;1399;1400;1406;1532;1639;1665;1834;1848;1883;1900;2009;2075	True;True;True;True;True;True;True;True;True;True;True;True;True;True;True;True;True;True;True;True	350;569;763;858;859;918;1163;1314;1315;1413;1414;1420;1559;1667;1693;1867;1882;1917;1934;2044;2111	2586;2587;2588;2589;2590;2591;2592;2593;2594;2595;2596;2597;2598;2599;2600;2601;4134;4135;4136;4137;4138;4139;5512;5513;5514;5515;5516;5517;5518;5519;6266;6267;6268;6269;6270;6271;6272;6273;6274;6275;6276;6277;6278;6279;6280;6281;6282;6723;6724;6725;6726;6727;6728;6729;6730;9453;9454;9455;9456;9457;9458;9459;9460;10428;10429;10430;10431;10432;10433;10434;10435;10436;10437;11059;11060;11061;11062;…	1699;1700;1701;1702;1703;1704;1705;1706;1707;1708;1709;1710;1711;2503;2504;3270;3271;3272;3687;3688;3689;3690;3691;3692;3693;3694;3695;3696;3697;3940;3941;3942;3943;5482;5909;5910;5911;6245;6246;6247;6248;6249;6250;6251;6252;6253;6254;6255;6256;6257;6258;6288;6289;6290;6291;6292;6293;7295;7805;7806;7807;7808;7809;7919;7920;7921;7922;8730;8799;8800;8801;9042;9043;9044;9099;9100;9101;9102;9103;9104…	1702;2503;3270;3691;3696;3943;5482;5909;6256;6258;6289;7295;7807;7921;8730;8800;9042;9108;9498;9814	181;182;183;184	61;122;127;549	1	0.801218
sp|Q3UZ39|LRRF1_MOUSE	sp|Q3UZ39|LRRF1_MOUSE	1	1	1	>sp|P08249|MDHM_MOUSE Malate dehydrogenase, mitochondrial OS=Mus musculus GN=Mdh2 PE=1 SV=3	1	8	8	8	8	6	8	6	8	6	28.1	28.1	28.1	35.611	338	338	0	50.57	By MS/MS	By MS/MS	28.1	20.7	3241200	1851500	1389700	1044500	839730	13	1	14	84	208;525;633;787;829;886;1300;1889	True;True;True;True;True;True;True;True	209;530;640;794;836;894;1312;1923	1557;1558;1559;1560;1561;1562;1563;1564;1565;1566;1567;3872;4614;4615;4616;4617;4618;4619;4620;4621;5761;5762;5763;6078;6079;6080;6081;6082;6083;6560;6561;6562;6563;6564;6565;6566;6567;6568;6569;6570;6571;6572;6573;6574;6575;10423;10424;15601;15602;15603;15604;15605	1049;1050;1051;2358;2792;2793;2794;3416;3582;3847;5903;5904;9063;9064	1049;2358;2793;3416;3582;3847;5903;9064	65	315	1	0.803954
sp|Q3V3R1|C1TM_MOUSE	sp|Q3V3R1|C1TM_MOUSE	2	2	2	>sp|P26039|TLN1_MOUSE Talin-1 OS=Mus musculus GN=Tln1 PE=1 SV=2	2	12	12	12	12	11	12	11	12	11	6.4	6.4	6.4	269.82	2541	2541;2375	0	163.57	By MS/MS	By MS/MS	6.4	5.5	1565400	927910	637480	991660	799440	16	11	27	137	6;193;304;532;690;1051;1087;1145;1385;1552;1960;1982	True;True;True;True;True;True;True;True;True;True;True;True	6;194;306;537;697;1059;1096;1154;1399;1579;1994;2016	32;33;34;1452;1453;1454;2286;2287;2288;2289;3912;3913;3914;3915;4987;4988;4989;4990;8055;8056;8057;8058;8325;8326;9389;9390;9391;9392;10999;11000;11001;12797;12798;12799;12800;16081;16082;16083;16084;16234;16235;16236;16237;16238;16239	26;27;964;1519;1520;1521;2380;2381;2990;2991;4665;4666;4667;4668;4780;4781;4782;5462;5463;6211;6212;6213;7414;9319;9382;9383;9384	27;964;1520;2380;2991;4667;4782;5463;6211;7414;9319;9382	102	1407	1	0.806163
sp|Q501J6|DDX17_MOUSE	sp|Q501J6|DDX17_MOUSE	6	6	3	>sp|O54734|OST48_MOUSE Dolichyl-diphosphooligosaccharide--protein glycosyltransferase 48 kDa subunit OS=Mus musculus GN=Ddost PE=1 SV=2	1	2	2	2	2	2	2	2	2	2	5	5	5	49.027	441	441	0	13.213	By MS/MS	By MS/MS	5	5	604580	329170	275420	393460	319180	5	5	10	54	1418;1798	True;True	1433;1830	11214;11215;11216;11217;11218;11219;11220;11221;14747;14748;14749;14750;14751	6343;6344;6345;6346;6347;6348;6349;6350;6351;8555	6349;8555			1	0.811213
sp|Q505G8|ZN827_MOUSE	sp|Q505G8|ZN827_MOUSE	3	3	3	>sp|Q8VDD5|MYH9_MOUSE Myosin-9 OS=Mus musculus GN=Myh9 PE=1 SV=4	1	51	51	46	48	47	48	47	43	42	27.1	27.1	24.7	226.37	1960	1960	0	323.31	By MS/MS	By MS/MS	26.4	24.8	31031000	18472000	12559000	18664000	15154000	71	52	123	464	155;170;176;206;230;253;267;380;381;386;414;483;561;625;799;808;809;848;909;953;962;967;986;990;1022;1066;1080;1116;1121;1192;1193;1231;1342;1343;1350;1414;1442;1612;1613;1691;1724;1745;1784;1897;1899;1937;1938;2012;2019;2041;2061	True;True;True;True;True;True;True;True;True;True;True;True;True;True;True;True;True;True;True;True;True;True;True;True;True;True;True;True;True;True;True;True;True;True;True;True;True;True;True;True;True;True;True;True;True;True;True;True;True;True;True	156;171;177;207;231;254;269;383;384;389;417;488;568;632;806;815;816;855;917;961;970;975;994;998;1030;1075;1089;1125;1130;1202;1203;1241;1356;1357;1364;1428;1429;1457;1640;1641;1720;1754;1775;1816;1931;1933;1971;1972;2047;2054;2077;2097	1054;1055;1056;1057;1286;1287;1288;1289;1342;1343;1344;1345;1346;1347;1348;1349;1350;1351;1352;1353;1354;1538;1539;1540;1541;1542;1543;1544;1545;1546;1547;1548;1549;1550;1551;1552;1708;1709;1710;1897;1898;1899;1900;1901;1902;1903;1904;1905;1906;2021;2022;2023;2024;2025;2026;2027;2028;2029;2816;2817;2818;2819;2820;2821;2822;2823;2824;2825;2826;2827;2828;2829;2843;2844;2845;2846;2847;3018;3019;3020…	653;654;842;843;894;895;896;897;1036;1037;1038;1039;1040;1041;1042;1043;1044;1045;1046;1047;1128;1129;1130;1287;1288;1289;1290;1291;1354;1843;1844;1845;1855;1943;2210;2211;2212;2213;2214;2499;2500;2501;2502;2774;3467;3491;3492;3493;3494;3495;3496;3497;3498;3499;3500;3501;3502;3503;3504;3505;3506;3507;3678;3939;4162;4163;4164;4165;4295;4296;4297;4306;4307;4374;4375;4376;4377;4400;4401;4558;4559;47…	654;842;894;1041;1128;1290;1354;1843;1844;1855;1943;2212;2499;2774;3467;3491;3503;3678;3939;4163;4296;4306;4375;4401;4559;4709;4759;5344;5352;5583;5584;5714;6040;6042;6067;6319;6413;7723;7725;8060;8206;8278;8461;9096;9098;9242;9243;9507;9525;9665;9774	42;294;295;296;297;298;299;300;301;302;303;304;305;306;307;308;309	161;162;365;627;871;874;879;983;1101;1190;1489;1506;1510;1565;1678;1682;1910	1	0.811937
sp|Q5EE38|ACD_MOUSE	sp|Q5EE38|ACD_MOUSE	1	1	1	>sp|Q69ZN7|MYOF_MOUSE Myoferlin OS=Mus musculus GN=Myof PE=1 SV=2	1	3	3	3	3	3	3	3	3	3	1.7	1.7	1.7	233.32	2048	2048	0	18.43	By MS/MS	By MS/MS	1.7	1.7	316370	181960	134410	201350	163560	5	2	7	380	387;719;1943	True;True;True	390;726;1977	2848;2849;2850;2851;5155;5156;5157;15962;15963;15964;15965	1856;1857;1858;3080;9254;9255;9256;9257	1858;3080;9254			1	0.812317
sp|Q5F2E7|NUFP2_MOUSE	sp|Q5F2E7|NUFP2_MOUSE	1	1	1	>sp|Q8BTM8|FLNA_MOUSE Filamin-A OS=Mus musculus GN=Flna PE=1 SV=5	1	31	31	29	31	28	31	28	29	27	16	16	15.3	281.22	2647	2647	0	323.31	By MS/MS	By MS/MS	16	14.6	16040000	9299200	6740500	9928600	8134700	62	41	103	428	74;88;118;205;328;331;344;411;431;438;526;554;623;764;807;892;1106;1479;1615;1627;1633;1766;1868;1871;1992;1993;2000;2010;2025;2035;2063	True;True;True;True;True;True;True;True;True;True;True;True;True;True;True;True;True;True;True;True;True;True;True;True;True;True;True;True;True;True;True	74;89;119;206;330;333;346;414;435;442;531;561;630;771;814;900;1115;1494;1643;1655;1661;1798;1902;1905;2027;2028;2035;2045;2060;2070;2099	465;466;467;468;469;570;571;572;573;762;763;764;765;766;767;1531;1532;1533;1534;1535;1536;1537;2475;2476;2477;2478;2479;2480;2487;2488;2566;2567;2568;2569;3003;3004;3005;3006;3166;3167;3168;3169;3170;3171;3196;3197;3198;3199;3200;3201;3202;3203;3873;4087;4088;4089;4090;4091;4565;4566;4567;4568;4569;4570;4571;4572;5584;5585;5586;5587;5588;5589;5590;5591;5922;5923;5924;5925;5926;5927;5928;5929;5930…	291;373;374;375;376;377;378;497;498;1030;1031;1032;1033;1034;1035;1630;1631;1632;1633;1634;1639;1689;1690;1932;2017;2018;2019;2020;2021;2022;2023;2038;2359;2477;2764;2765;2766;2767;2768;2769;2770;3309;3310;3311;3312;3313;3314;3484;3485;3486;3487;3488;3489;3490;3854;3855;3856;3857;5328;6572;6573;6574;6575;6576;7729;7761;7762;7763;7764;7765;7766;7767;7778;7779;7780;7781;8382;8890;8898;8899;9433;943…	291;378;497;1031;1630;1639;1690;1932;2017;2038;2359;2477;2766;3313;3490;3854;5328;6576;7729;7764;7780;8382;8890;8899;9433;9434;9462;9502;9562;9633;9781	278	297	1	0.81932
sp|Q5NBX1|COBL_MOUSE	sp|Q5NBX1|COBL_MOUSE	1	1	1	>sp|P62717|RL18A_MOUSE 60S ribosomal protein L18a OS=Mus musculus GN=Rpl18a PE=1 SV=1	1	3	3	3	3	3	3	3	3	3	21	21	21	20.732	176	176	0	22.645	By MS/MS	By MS/MS	21	21	957810	613040	344770	342170	281340	10	8	18	237	388;827;1651	True;True;True	391;834;1679	2852;2853;2854;2855;2856;2857;2858;2859;6071;6072;6073;13554;13555;13556;13557;13558;13559;13560;13561	1859;1860;1861;1862;1863;1864;3577;3578;3579;7854;7855;7856;7857;7858;7859;7860;7861;7862	1861;3577;7861			1	0.822223
sp|Q60605|MYL6_MOUSE;sp|Q8CI43|MYL6B_MOUSE	sp|Q60605|MYL6_MOUSE;sp|Q8CI43|MYL6B_MOUSE	1;1	1;1	1;1	>sp|Q99PT1|GDIR1_MOUSE Rho GDP-dissociation inhibitor 1 OS=Mus musculus GN=Arhgdia PE=1 SV=3	1	2	2	2	2	2	2	2	2	2	15.2	15.2	15.2	23.407	204	204	0	12.52	By MS/MS	By matching	15.2	15.2	1082800	671890	410940	366910	302400	3	0	3	507	73;1878	True;True	73;1912	459;460;461;462;463;464;15529;15530;15531;15532;15533;15534;15535;15536;15537;15538;15539	290;9028;9029	290;9028	332	162	1	0.82418
sp|Q60668|HNRPD_MOUSE	sp|Q60668|HNRPD_MOUSE	2	2	2	>sp|P62751|RL23A_MOUSE 60S ribosomal protein L23a OS=Mus musculus GN=Rpl23a PE=1 SV=1	1	3	3	3	2	3	2	3	2	3	16	16	16	17.695	156	156	0	19.091	By MS/MS	By MS/MS	15.4	16	4326400	2827300	1499200	1249900	1038900	4	3	7	239	437;961;1049	True;True;True	441;969;1057	3191;3192;3193;3194;3195;7288;7289;8038;8039;8040;8041;8042;8043;8044	2036;2037;4293;4294;4657;4658;4659	2037;4294;4659			1	0.831186
sp|Q60692|PSB6_MOUSE	sp|Q60692|PSB6_MOUSE	2	2	2	>sp|P57780|ACTN4_MOUSE Alpha-actinin-4 OS=Mus musculus GN=Actn4 PE=1 SV=1	1	6	6	3	6	3	6	3	3	1	8.7	8.7	4.4	104.98	912	912	0	41.057	By MS/MS	By MS/MS	8.7	4.5	1390200	855420	534740	863170	718630	11	3	14	206	556;1215;1217;1253;1777;2007	True;True;True;True;True;True	563;1225;1227;1264;1809;2042	4099;4100;4101;4102;4103;4104;4105;4106;9833;9834;9851;10125;10126;10127;10128;14529;14530;14531;14532;14533;14534;14535;16400	2484;2485;2486;2487;2488;5656;5662;5783;5784;8412;8413;8414;8415;8416;9492	2486;5656;5662;5784;8412;9492	146	374	1	0.832547
sp|Q60847|COCA1_MOUSE	sp|Q60847|COCA1_MOUSE	5	5	5	>sp|Q9QXS1|PLEC_MOUSE Plectin OS=Mus musculus GN=Plec PE=1 SV=3	1	19	19	19	17	17	17	17	17	17	5.1	5.1	5.1	534.18	4691	4691	0	204.48	By MS/MS	By MS/MS	4.5	4.4	2728100	1688100	1039900	1654100	1381500	30	18	48	579	119;221;1033;1127;1128;1131;1142;1175;1183;1221;1225;1227;1390;1500;1508;1555;1576;1946;2094	True;True;True;True;True;True;True;True;True;True;True;True;True;True;True;True;True;True;True	120;222;1041;1136;1137;1140;1151;1185;1193;1231;1235;1237;1404;1515;1526;1582;1604;1980;2132	768;769;770;1653;1654;1655;1656;7921;7922;7923;7924;9273;9274;9275;9276;9277;9278;9279;9280;9281;9282;9283;9284;9285;9286;9287;9294;9295;9296;9297;9298;9378;9379;9380;9381;9382;9566;9567;9568;9569;9624;9927;9928;9929;9930;9931;9952;9953;9961;11016;11017;11018;11019;11020;11832;11833;11996;12816;12817;12818;12819;13035;13036;13037;13038;13039;13040;15974;15975;15976;15977;17157;17158	499;500;501;1104;1105;1106;1107;4585;4586;5392;5393;5394;5395;5396;5397;5398;5399;5400;5401;5402;5403;5404;5405;5413;5414;5415;5416;5417;5458;5459;5533;5534;5550;5695;5703;5706;6222;6223;6224;6225;6627;6628;6779;7425;7426;7552;9260;9958	501;1105;4585;5393;5401;5414;5459;5533;5550;5695;5703;5706;6224;6627;6779;7425;7552;9260;9958	367	2621	1	0.835197
sp|Q60848|HELLS_MOUSE	sp|Q60848|HELLS_MOUSE	1	1	1	>sp|P62301|RS13_MOUSE 40S ribosomal protein S13 OS=Mus musculus GN=Rps13 PE=1 SV=2	1	4	4	4	4	4	4	4	4	4	23.2	23.2	23.2	17.222	151	151	0	24.391	By MS/MS	By MS/MS	23.2	23.2	1932800	1226300	706490	666970	558850	7	3	10	234	698;699;976;1239	True;True;True;True	705;706;984;1250	5034;5035;5036;5037;5038;5039;5040;5041;5042;5043;5044;5045;5046;5047;5048;7365;7366;7367;7368;7369;7370;7371;7372;7373;10024;10025;10026;10027;10028	3022;3023;3024;3025;3026;4324;4325;5727;5728;5729	3022;3024;4325;5727			1	0.837894
sp|Q60864|STIP1_MOUSE	sp|Q60864|STIP1_MOUSE	4	4	4	>sp|Q05920|PYC_MOUSE Pyruvate carboxylase, mitochondrial OS=Mus musculus GN=Pc PE=1 SV=1	1	9	9	9	8	7	8	7	8	7	9.6	9.6	9.6	129.68	1178	1178	0	68.802	By MS/MS	By MS/MS	8.1	7.6	3308700	1547400	1761300	1965900	1650700	20	20	40	308	50;67;165;335;627;702;727;761;803	True;True;True;True;True;True;True;True;True	50;67;166;337;634;709;734;768;810	289;290;291;292;293;386;387;388;389;390;391;392;393;394;395;396;397;398;399;400;401;402;403;1264;1265;1266;2495;2496;2497;2498;2499;2500;2501;2502;2503;4585;5057;5058;5208;5570;5571;5572;5573;5574;5575;5576;5577;5883;5884;5885;5886;5887;5888;5889;5890;5891;5892;5893	189;190;191;192;193;246;247;248;249;250;251;252;253;254;255;256;257;258;259;827;828;1645;1646;1647;1648;1649;1650;1651;1652;2776;2777;3037;3038;3095;3300;3301;3302;3303;3474;3475	190;258;827;1649;2776;3037;3095;3301;3474	215;216;217	854;900;1116	1	0.839666
sp|Q60865|CAPR1_MOUSE	sp|Q60865|CAPR1_MOUSE	2	2	2	>sp|Q91V92|ACLY_MOUSE ATP-citrate synthase OS=Mus musculus GN=Acly PE=1 SV=1	1	2	2	2	2	2	2	2	2	2	2	2	2	119.73	1091	1091	0	12.228	By MS/MS	By MS/MS	2	2	216470	130960	85506	133560	112160	3	2	5	474	370;2070	True;True	373;2106	2778;2779;2780;2781;16892;16893;16894;16895	1825;9795;9796;9797;9798	1825;9796			1	0.839772
sp|Q60930|VDAC2_MOUSE	sp|Q60930|VDAC2_MOUSE	1	1	1	>sp|P62855|RS26_MOUSE 40S ribosomal protein S26 OS=Mus musculus GN=Rps26 PE=3 SV=3	1	2	2	2	2	2	2	2	2	2	20.9	20.9	20.9	13.015	115	115	0	13.641	By MS/MS	By MS/MS	20.9	20.9	2273600	1411900	861740	899970	761180	2	1	3	248	374;1369	True;True	377;1383	2796;2797;2798;10834;10835;10836;10837;10838;10839;10840;10841;10842;10843;10844;10845	1832;1833;6145	1833;6145			1	0.845784
sp|Q60932|VDAC1_MOUSE	sp|Q60932|VDAC1_MOUSE	2	2	2	>sp|P80313|TCPH_MOUSE T-complex protein 1 subunit eta OS=Mus musculus GN=Cct7 PE=1 SV=1	1	3	3	3	2	3	2	3	2	3	6.1	6.1	6.1	59.652	544	544	0	19.564	By MS/MS	By MS/MS	3.9	6.1	648950	370370	278580	407220	344980	3	2	5	278	285;663;1716	True;True;True	287;670;1746	2150;2151;2152;2153;2154;2155;2156;2157;4791;14115;14116;14117;14118;14119;14120;14121;14122	1437;1438;2882;8183;8184	1438;2882;8184	197	382	1	0.847159
sp|Q60953|PML_MOUSE	sp|Q60953|PML_MOUSE	2	2	2	>sp|Q922J9|FACR1_MOUSE Fatty acyl-CoA reductase 1 OS=Mus musculus GN=Far1 PE=1 SV=1	1	2	2	2	2	2	2	2	2	2	5.4	5.4	5.4	59.434	515	515	0	11.904	By MS/MS	By MS/MS	5.4	5.4	9122600	5390800	3731800	1921900	1629400	3	1	4	491	161;2102	True;True	162;2140	1242;1243;1244;1245;1246;17191;17192;17193;17194;17195;17196;17197;17198;17199;17200;17201;17202;17203;17204;17205	812;813;814;9975	813;9975	320	450	1	0.847807
sp|Q60972|RBBP4_MOUSE	sp|Q60972|RBBP4_MOUSE	1	1	1	>sp|Q9DCD0|6PGD_MOUSE 6-phosphogluconate dehydrogenase, decarboxylating OS=Mus musculus GN=Pgd PE=1 SV=3	1	3	3	3	3	3	3	3	3	3	7.7	7.7	7.7	53.247	483	483	0	84.027	By MS/MS	By MS/MS	7.7	7.7	1422900	879580	543340	873740	741170	8	8	16	552	113;128;683	True;True;True	114;129;690	731;732;733;734;735;736;737;738;739;740;812;813;814;815;816;817;818;819;4944;4945;4946;4947;4948;4949;4950;4951	476;477;478;479;527;528;529;2970;2971;2972;2973;2974;2975;2976;2977;2978	477;527;2978			1	0.848273
sp|Q61029|LAP2B_MOUSE;sp|Q61033|LAP2A_MOUSE	sp|Q61029|LAP2B_MOUSE;sp|Q61033|LAP2A_MOUSE	7;5	7;5	7;5	>sp|Q8CIE6|COPA_MOUSE Coatomer subunit alpha OS=Mus musculus GN=Copa PE=1 SV=2	1	2	2	2	2	2	2	2	2	2	2.1	2.1	2.1	138.43	1224	1224	0	11.206	By MS/MS	By MS/MS	2.1	2.1	193900	101410	92486	120850	102820	2	1	3	451	687;1783	True;True	694;1815	4973;4974;4975;4976;14597;14598;14599;14600	2983;2984;8460	2983;8460			1	0.850807
sp|Q61166|MARE1_MOUSE	sp|Q61166|MARE1_MOUSE	1	1	1	>sp|Q91ZA3|PCCA_MOUSE Propionyl-CoA carboxylase alpha chain, mitochondrial OS=Mus musculus GN=Pcca PE=1 SV=2	1	3	3	3	3	2	3	2	3	2	5.7	5.7	5.7	79.921	724	724	0	22.078	By MS/MS	By MS/MS	5.7	3.6	441940	264200	177750	279120	237810	5	4	9	485	1268;1286;2038	True;True;True	1279;1298;2074	10233;10331;10332;10333;10334;16651;16652;16653;16654;16655;16656;16657	5820;5863;5864;9654;9655;9656;9657;9658;9659	5820;5863;9656	317;318	101;462	1	0.851999
sp|Q61316|HSP74_MOUSE;sp|P48722|HS74L_MOUSE	sp|Q61316|HSP74_MOUSE	5;1	5;1	4;0	>sp|P60710|ACTB_MOUSE Actin, cytoplasmic 1 OS=Mus musculus GN=Actb PE=1 SV=1	1	15	15	1	13	15	13	15	1	1	47.2	47.2	4.5	41.736	375	375	0	323.31	By MS/MS	By MS/MS	38.7	47.2	141150000	86262000	54888000	77888000	66945000	61	59	120	213	99;310;336;360;402;403;464;466;788;798;843;1060;1064;1701;1867	True;True;True;True;True;True;True;True;True;True;True;True;True;True;True	100;312;338;362;363;405;406;468;469;471;795;805;850;1069;1073;1730;1901	624;625;626;627;628;629;630;631;632;633;634;635;636;637;638;639;640;641;642;643;2340;2341;2342;2343;2344;2345;2346;2347;2348;2349;2350;2351;2352;2353;2354;2355;2504;2505;2506;2507;2508;2509;2510;2511;2700;2701;2702;2703;2704;2705;2706;2707;2708;2920;2921;2922;2923;2924;2925;2926;2927;2928;2929;2930;2931;2932;2933;2934;2935;2936;2937;2938;2939;2940;2941;2942;2943;2944;2945;2946;2947;2948;2949;2950…	403;404;405;406;407;408;409;410;411;412;413;414;415;416;417;418;419;420;1545;1546;1547;1548;1653;1785;1786;1787;1788;1789;1790;1791;1792;1793;1794;1795;1796;1897;1898;1899;1900;1901;1902;1903;1904;1905;1906;1907;1908;1909;1910;1911;2147;2148;2149;2150;2151;2152;2153;2155;3417;3418;3419;3420;3421;3422;3423;3424;3425;3426;3427;3428;3429;3430;3431;3464;3465;3466;3644;4689;4701;4702;4703;8105;8106;81…	413;1547;1653;1787;1900;1903;2152;2155;3422;3465;3644;4689;4702;8108;8870	154;155;156;157;158;159	16;44;47;190;227;325	1	0.859503
sp|Q61335|BAP31_MOUSE	sp|Q61335|BAP31_MOUSE	1	1	1	>sp|P50580|PA2G4_MOUSE Proliferation-associated protein 2G4 OS=Mus musculus GN=Pa2g4 PE=1 SV=3	1	3	3	3	3	3	3	3	3	3	7.9	7.9	7.9	43.698	394	394	0	19.504	By MS/MS	By MS/MS	7.9	7.9	1153200	675680	477530	706060	609590	4	2	6	188	22;189;1774	True;True;True	22;190;1806	115;116;117;118;119;1430;1431;1432;1433;1434;1435;1436;1437;1438;1439;14515;14516;14517;14518;14519;14520;14521	79;948;949;950;951;8407	79;951;8407			1	0.863369
sp|Q61398|PCOC1_MOUSE	sp|Q61398|PCOC1_MOUSE	1	1	1	>sp|Q64727|VINC_MOUSE Vinculin OS=Mus musculus GN=Vcl PE=1 SV=4	1	12	12	12	12	11	12	11	12	11	12.9	12.9	12.9	116.72	1066	1066	0	80.79	By MS/MS	By MS/MS	12.9	12.1	4456500	2576600	1879900	2719600	2349300	20	16	36	376	33;98;164;232;301;506;771;1306;1333;1590;1684;1985	True;True;True;True;True;True;True;True;True;True;True;True	33;99;165;233;303;511;778;1319;1347;1618;1713;2019	190;191;620;621;622;623;1260;1261;1262;1263;1719;1720;1721;1722;1723;1724;2259;2260;2261;2262;2263;2264;2265;2266;3656;3657;3658;3659;3660;3661;3662;5636;5637;5638;5639;10458;10459;10460;10461;10588;10589;10590;10591;13156;13157;13158;13159;13160;13161;13867;13868;13869;13870;13871;13872;13873;16252;16253;16254;16255	132;400;401;402;823;824;825;826;1136;1137;1138;1139;1140;1500;1501;1502;1503;1504;1505;1506;2267;2268;3350;3351;5923;5924;5925;5926;6020;7634;7635;7636;7637;8025;8026;8027;8028;9393;9394;9395	132;401;823;1140;1504;2268;3350;5924;6020;7636;8025;9393	244;245;246;247;248;249;250;251	190;195;327;331;709;898;899;900	1	0.86384
sp|Q61553|FSCN1_MOUSE	sp|Q61553|FSCN1_MOUSE	3	3	3	>sp|Q61316|HSP74_MOUSE Heat shock 70 kDa protein 4 OS=Mus musculus GN=Hspa4 PE=1 SV=1	2	5	5	4	5	5	5	5	4	4	7.8	7.8	6.2	94.132	841	841;838	0	32.908	By MS/MS	By MS/MS	7.8	7.8	806950	489210	317740	481640	423070	7	5	12	347	93;101;504;632;1949	True;True;True;True;True	94;102;509;639;1983	592;593;594;651;652;653;654;655;3649;3650;3651;4610;4611;4612;4613;15990;15991;15992;15993;15994;15995	385;428;429;2260;2261;2262;2790;2791;9265;9266;9267;9268	385;428;2262;2790;9266			1	0.878395
sp|Q61595|KTN1_MOUSE	sp|Q61595|KTN1_MOUSE	9	9	9	>sp|Q99PL5|RRBP1_MOUSE Ribosome-binding protein 1 OS=Mus musculus GN=Rrbp1 PE=1 SV=2	1	69	69	69	66	63	66	63	66	63	58.6	58.6	58.6	172.88	1605	1605	0	323.31	By MS/MS	By MS/MS	58.2	55.5	313270000	175600000	137670000	182610000	160810000	190	153	343	505	79;200;233;234;262;263;264;294;295;354;372;429;469;501;512;530;539;540;651;887;895;941;942;969;970;971;972;974;978;980;983;993;994;1003;1014;1015;1020;1108;1117;1118;1124;1178;1184;1199;1200;1228;1317;1435;1436;1443;1444;1453;1463;1480;1513;1554;1568;1602;1603;1730;1734;1767;1775;1793;1800;1835;1915;1990;2014	True;True;True;True;True;True;True;True;True;True;True;True;True;True;True;True;True;True;True;True;True;True;True;True;True;True;True;True;True;True;True;True;True;True;True;True;True;True;True;True;True;True;True;True;True;True;True;True;True;True;True;True;True;True;True;True;True;True;True;True;True;True;True;True;True;True;True;True;True	80;201;234;235;263;264;265;266;296;297;356;375;433;474;506;517;535;545;546;547;658;895;903;949;950;977;978;979;980;982;986;988;991;1001;1002;1011;1022;1023;1028;1117;1126;1127;1133;1188;1194;1209;1210;1238;1330;1450;1451;1458;1459;1468;1478;1495;1531;1581;1595;1630;1631;1760;1764;1799;1807;1825;1832;1868;1949;2025;2049	508;509;510;511;512;513;514;515;516;517;518;519;520;1488;1489;1490;1491;1492;1493;1494;1725;1726;1727;1728;1729;1970;1971;1972;1973;1974;1975;1976;1977;1978;1979;1980;1981;1982;1983;1984;1985;1986;1987;1988;1989;1990;1991;1992;1993;1994;1995;1996;1997;1998;1999;2000;2001;2002;2003;2004;2005;2006;2007;2008;2009;2010;2011;2012;2013;2014;2015;2016;2217;2218;2219;2220;2221;2222;2223;2224;2225;2226;22…	310;311;312;313;314;315;316;317;318;319;320;985;986;987;988;989;990;1141;1142;1143;1144;1326;1327;1328;1329;1330;1331;1332;1333;1334;1335;1336;1337;1338;1339;1340;1341;1342;1343;1344;1345;1346;1347;1348;1349;1350;1351;1472;1473;1474;1475;1476;1477;1478;1479;1480;1481;1482;1720;1721;1722;1723;1724;1725;1726;1727;1728;1729;1827;1828;1829;1830;2008;2009;2010;2011;2012;2013;2014;2158;2159;2160;2254;2…	310;990;1141;1144;1327;1350;1351;1472;1480;1727;1829;2009;2159;2255;2279;2373;2418;2421;2839;3848;3866;4063;4064;4312;4317;4318;4319;4322;4336;4341;4355;4406;4407;4444;4476;4489;4554;5332;5347;5348;5387;5540;5556;5606;5607;5707;5942;6386;6387;6417;6421;6454;6530;6579;6798;7418;7492;7687;7688;8220;8241;8384;8408;8520;8566;8735;9157;9416;9511	322;323;324;325;326;327;328;329;330	127;179;815;863;933;965;1228;1307;1340	1	0.88062
sp|Q61598|GDIB_MOUSE	sp|Q61598|GDIB_MOUSE	3	3	3	>sp|P47911|RL6_MOUSE 60S ribosomal protein L6 OS=Mus musculus GN=Rpl6 PE=1 SV=3	1	3	3	3	3	2	3	2	3	2	10.1	10.1	10.1	33.509	296	296	0	19.918	By MS/MS	By MS/MS	10.1	6.1	4643300	2736000	1907300	2068600	1842800	9	4	13	178	307;944;2104	True;True;True	309;952;2142	2306;2307;2308;2309;2310;2311;2312;2313;2314;2315;2316;2317;2318;2319;2320;6978;6979;6980;6981;17210;17211;17212;17213;17214;17215;17216;17217;17218;17219;17220;17221	1528;1529;1530;1531;1532;1533;1534;1535;1536;1537;1538;4067;9980	1538;4067;9980			1	0.890844
sp|Q61655|DD19A_MOUSE	sp|Q61655|DD19A_MOUSE	1	1	1	>sp|Q61553|FSCN1_MOUSE Fascin OS=Mus musculus GN=Fscn1 PE=1 SV=4	1	3	3	3	3	3	3	3	3	3	6.9	6.9	6.9	54.507	493	493	0	18.053	By MS/MS	By MS/MS	6.9	6.9	1163600	621760	541820	695440	620100	3	1	4	350	1208;2077;2098	True;True;True	1218;2113;2136	9786;9787;9788;9789;9790;16936;16937;16938;16939;16940;16941;17165;17166;17167;17168;17169;17170;17171;17172	5631;5632;9816;9965	5631;9816;9965			1	0.891666
sp|Q61656|DDX5_MOUSE	sp|Q61656|DDX5_MOUSE	6	3	3	>sp|P97351|RS3A_MOUSE 40S ribosomal protein S3a OS=Mus musculus GN=Rps3a PE=1 SV=3	1	6	6	6	6	3	6	3	6	3	22.7	22.7	22.7	29.885	264	264	0	43.902	By MS/MS	By MS/MS	22.7	11.7	1556000	1056900	499110	506470	452010	5	2	7	291	19;209;1112;1162;1826;1828	True;True;True;True;True;True	19;210;1121;1172;1859;1861	100;101;102;103;1568;9154;9155;9156;9157;9158;9159;9160;9161;9162;9163;9500;15008;15009;15010;15011;15012;15013;15014;15015;15016;15017;15018;15019;15032	69;70;1052;5340;5496;8708;8711	69;1052;5340;5496;8708;8711	201;202	38;229	1	0.892471
sp|Q61687|ATRX_MOUSE	sp|Q61687|ATRX_MOUSE	3	3	3	>sp|P06151|LDHA_MOUSE L-lactate dehydrogenase A chain OS=Mus musculus GN=Ldha PE=1 SV=3	3	3	3	3	3	3	3	3	3	3	9.6	9.6	9.6	36.498	332	332;332;334	0	33.046	By MS/MS	By MS/MS	9.6	9.6	5868200	3191700	2676500	2114600	1904800	14	12	26	78	1476;1933;2030	True;True;True	1491;1967;2065	11703;11704;11705;11706;11707;11708;11709;11710;11711;11712;15913;15914;15915;15916;15917;15918;15919;15920;15921;15922;15923;15924;15925;15926;15927;16572;16573;16574;16575;16576;16577;16578;16579;16580;16581;16582;16583;16584;16585;16586;16587	6562;6563;6564;6565;6566;6567;9226;9227;9228;9229;9230;9231;9232;9233;9591;9592;9593;9594;9595;9596;9597;9598;9599;9600;9601;9602	6566;9232;9595			1	0.900785
sp|Q61699|HS105_MOUSE	sp|Q61699|HS105_MOUSE	2	1	1	>sp|Q78PY7|SND1_MOUSE Staphylococcal nuclease domain-containing protein 1 OS=Mus musculus GN=Snd1 PE=1 SV=1	1	10	10	10	10	9	10	9	10	9	14.8	14.8	14.8	102.09	910	910	0	323.31	By MS/MS	By MS/MS	14.8	13.1	5299500	3068100	2231400	3134800	2825100	22	12	34	397	11;524;537;1210;1354;1506;1654;1859;1940;1986	True;True;True;True;True;True;True;True;True;True	11;529;543;1220;1368;1524;1682;1893;1974;2020;2021	53;54;55;3865;3866;3867;3868;3869;3870;3871;3954;3955;3956;3957;9794;9795;9796;9797;10736;11991;11992;11993;11994;13586;13587;13588;13589;13590;13591;13592;13593;13594;13595;13596;15277;15278;15279;15280;15281;15282;15944;15945;15946;15947;15948;15949;15950;15951;16256;16257;16258;16259;16260;16261;16262	48;49;2352;2353;2354;2355;2356;2357;2413;2414;5634;5635;6085;6774;6775;6776;6777;7869;7870;7871;7872;8832;8833;8834;8835;9246;9247;9248;9396;9397;9398;9399;9400;9401	48;2356;2414;5634;6085;6774;7871;8834;9248;9396	260;261	348;601	1	0.901206
sp|Q61753|SERA_MOUSE	sp|Q61753|SERA_MOUSE	5	5	5	>sp|Q9JHU4|DYHC1_MOUSE Cytoplasmic dynein 1 heavy chain 1 OS=Mus musculus GN=Dync1h1 PE=1 SV=2	1	2	2	2	2	2	2	2	2	2	0.5	0.5	0.5	532.04	4644	4644	0	11.699	By MS/MS	By MS/MS	0.5	0.5	441600	204400	237200	210150	190200	2	1	3	564	1595;1966	True;True	1623;2000	13186;13187;13188;13189;13190;16126;16127;16128;16129	7661;9337;9338	7661;9338	357	4337	1	0.905068
sp|Q61768|KINH_MOUSE;sp|P28738|KIF5C_MOUSE;sp|P33175|KIF5A_MOUSE	sp|Q61768|KINH_MOUSE	6;2;2	6;2;2	6;2;2	>sp|P12970|RL7A_MOUSE 60S ribosomal protein L7a OS=Mus musculus GN=Rpl7a PE=1 SV=2	1	4	4	4	4	4	4	4	4	4	14.7	14.7	14.7	29.976	266	266	0	256.83	By MS/MS	By MS/MS	14.7	14.7	4273000	2327500	1945500	2403000	2176500	11	9	20	103	120;121;1358;1998	True;True;True;True	121;122;1372;2033	771;772;773;774;775;776;777;778;779;780;781;782;783;10756;10757;10758;10759;10760;10761;10762;10763;10764;10765;10766;10767;10768;16348;16349;16350	502;503;504;505;506;507;508;509;6099;6100;6101;6102;6103;6104;6105;6106;6107;6108;6109;9452;9453	506;509;6107;9452			1	0.905743
sp|Q61792|LASP1_MOUSE	sp|Q61792|LASP1_MOUSE	1	1	1	>sp|Q501J6|DDX17_MOUSE Probable ATP-dependent RNA helicase DDX17 OS=Mus musculus GN=Ddx17 PE=1 SV=1	1	6	6	3	5	5	5	5	3	2	11.7	11.7	6.3	72.399	650	650	0	105.25	By MS/MS	By MS/MS	10.2	9.8	2510900	1575700	935190	1511000	1368900	17	9	26	327	212;478;637;1657;1666;1955	True;True;True;True;True;True	213;483;644;1685;1694;1989	1573;1574;1575;1576;1577;1578;1579;1580;3517;3518;3519;3520;3521;3522;4645;4646;4647;4648;4649;4650;4651;4652;13610;13611;13612;13613;13614;13615;13676;16042;16043;16044	1055;1056;1057;1058;1059;1060;2191;2192;2193;2194;2195;2196;2805;2806;2807;2808;2809;2810;7883;7884;7885;7886;7887;7923;9288;9289	1057;2193;2807;7887;7923;9289			1	0.905956
sp|Q61879|MYH10_MOUSE	sp|Q61879|MYH10_MOUSE	7	4	3	>sp|P09411|PGK1_MOUSE Phosphoglycerate kinase 1 OS=Mus musculus GN=Pgk1 PE=1 SV=4	2	4	4	4	4	4	4	4	4	4	14.6	14.6	14.6	44.55	417	417;417	0	71.136	By MS/MS	By MS/MS	14.6	14.6	3256800	1813900	1443000	1938600	1764000	10	8	18	88	635;1092;1968;1970	True;True;True;True	642;1101;2002;2004	4636;4637;4638;4639;4640;4641;4642;8340;8341;8342;8343;8344;8345;8346;8347;16131;16132;16133;16134;16135;16136;16137;16138;16139;16141;16142;16143;16144;16145;16146;16147;16148;16149;16150;16151;16152;16153;16154	2797;2798;2799;2800;2801;2802;2803;4791;4792;9340;9341;9342;9343;9344;9345;9346;9347;9349	2802;4792;9344;9349	67	251	1	0.909935
sp|Q61881|MCM7_MOUSE	sp|Q61881|MCM7_MOUSE	4	4	4	>sp|Q60864|STIP1_MOUSE Stress-induced-phosphoprotein 1 OS=Mus musculus GN=Stip1 PE=1 SV=1	1	4	4	4	4	3	4	3	4	3	7.9	7.9	7.9	62.581	543	543	0	23.637	By MS/MS	By MS/MS	7.9	5.5	2126700	1321300	805350	1052800	960790	5	4	9	339	392;1059;1161;1291	True;True;True;True	395;1068;1171;1303	2875;2876;2877;2878;2879;2880;2881;2882;2883;2884;2885;2886;2887;2888;2889;8124;8125;8126;9494;9495;9496;9497;9498;9499;10351;10352;10353;10354;10355;10356;10357;10358;10359;10360;10361;10362	1879;4688;5495;5873;5874;5875;5876;5877;5878	1879;4688;5495;5878	231;232	1;535	1	0.912604
sp|Q61937|NPM_MOUSE	sp|Q61937|NPM_MOUSE	2	2	2	>sp|P68372|TBB4B_MOUSE Tubulin beta-4B chain OS=Mus musculus GN=Tubb4b PE=1 SV=1;>sp|Q9D6F9|TBB4A_MOUSE Tubulin beta-4A chain OS=Mus musculus GN=Tubb4a PE=1 SV=3	3	8	3	2	8	7	3	2	2	2	21.1	10.6	7.2	49.83	445	445;444;447	0	19.99	By MS/MS	By MS/MS	21.1	17.8	1235000	700350	534640	719650	657360	5	3	8	269	197;314;465;536;880;1057;1328;2082	True;True;True;False;False;False;False;False	198;316;470;541;542;887;888;1065;1066;1341;2118	1468;2381;2382;2383;2384;2385;2386;2387;2388;2389;2390;2391;2392;3445;3446;3447;3448;3945;3946;3947;3948;3949;3950;3951;3952;3953;6496;6497;6498;6499;6500;6501;6502;6503;6504;6505;6506;6507;6508;6509;8091;8092;8093;8094;8095;8096;8097;8098;8099;8100;8101;8102;8103;8104;8105;8106;8107;8108;8109;8110;8111;8112;8113;8114;8115;8116;10532;10533;10534;10535;10536;10537;10538;10539;16966;16967;16968;169…	976;1576;1577;1578;1579;1580;1581;2154;2404;2405;2406;2407;2408;2409;2410;2411;2412;3821;3822;3823;3824;3825;3826;4678;4679;4680;4681;4682;4683;4684;4685;4686;5967;5968;5969;5970;5971;5972;5973;5974;5975;5976;9828	976;1579;2154;2409;3826;4679;5969;9828	189;190;191;192;193;194;195	73;164;257;293;321;323;330	1	0.913444
sp|Q61990|PCBP2_MOUSE	sp|Q61990|PCBP2_MOUSE	3	1	1	>sp|P29341|PABP1_MOUSE Polyadenylate-binding protein 1 OS=Mus musculus GN=Pabpc1 PE=1 SV=2	1	6	6	6	6	6	6	6	6	6	12.1	12.1	12.1	70.67	636	636	0	43.94	By MS/MS	By MS/MS	12.1	12.1	3595900	2037600	1558300	2160800	1977500	14	8	22	146	169;447;654;920;1547;1573	True;True;True;True;True;True	170;451;661;928;1574;1601	1276;1277;1278;1279;1280;1281;1282;1283;1284;1285;3256;3257;3258;3259;3260;3261;3262;3263;4741;4742;4743;4744;4745;6786;6787;6788;6789;6790;6791;6792;6793;12708;12709;12710;12711;12712;12713;12714;12715;12716;12978;12979;12980;12981;12982;12983;12984;12985	837;838;839;840;841;2062;2063;2064;2847;2848;3975;3976;3977;3978;3979;3980;7350;7351;7352;7507;7508;7509	840;2062;2847;3979;7351;7507	107	72	1	0.91517
sp|Q62093|SRSF2_MOUSE	sp|Q62093|SRSF2_MOUSE	1	1	1	>sp|P62806|H4_MOUSE Histone H4 OS=Mus musculus GN=Hist1h4a PE=1 SV=2	1	11	11	11	11	11	11	11	11	11	60.2	60.2	60.2	11.367	103	103	0	260.61	By MS/MS	By MS/MS	60.2	60.2	190140000	117540000	72599000	67910000	62612000	65	48	113	242	358;359;389;898;899;1018;1019;1846;1847;1911;1973	True;True;True;True;True;True;True;True;True;True;True	360;361;392;906;907;1026;1027;1879;1880;1881;1945;2007	2660;2661;2662;2663;2664;2665;2666;2667;2668;2669;2670;2671;2672;2673;2674;2675;2676;2677;2678;2679;2680;2681;2682;2683;2684;2685;2686;2687;2688;2689;2690;2691;2692;2693;2694;2695;2696;2697;2698;2699;2860;2861;6622;6623;6624;6625;6626;6627;6628;6629;6630;6631;6632;6633;6634;6635;6636;6637;6638;6639;6640;7763;7764;7765;7766;7767;7768;7769;7770;7771;7772;7773;7774;7775;7776;7777;7778;7779;7780;7781…	1756;1757;1758;1759;1760;1761;1762;1763;1764;1765;1766;1767;1768;1769;1770;1771;1772;1773;1774;1775;1776;1777;1778;1779;1780;1781;1782;1783;1784;1865;1866;3873;3874;3875;3876;3877;3878;3879;3880;3881;3882;3883;3884;3885;3886;3887;4538;4539;4540;4541;4542;4543;4544;4545;4546;4547;4548;4549;4550;4551;4552;4553;8754;8755;8756;8757;8758;8759;8760;8761;8762;8763;8764;8765;8766;8767;8768;8769;8770;8771…	1757;1778;1865;3880;3885;4543;4552;8764;8788;9146;9356	169	85	1	0.921985
sp|Q62186|SSRD_MOUSE	sp|Q62186|SSRD_MOUSE	1	1	1	>sp|Q9DB20|ATPO_MOUSE ATP synthase subunit O, mitochondrial OS=Mus musculus GN=Atp5o PE=1 SV=1	1	2	2	2	2	2	2	2	2	2	10.3	10.3	10.3	23.363	213	213	0	12.736	By MS/MS	By MS/MS	10.3	10.3	598770	385570	213210	179380	166000	1	2	3	547	2021;2054	True;True	2056;2090	16498;16499;16500;16501;16746;16747;16748;16749;16750;16751	9540;9541;9707	9541;9707			1	0.92541
sp|Q62188|DPYL3_MOUSE;sp|P97427|DPYL1_MOUSE	sp|Q62188|DPYL3_MOUSE	3;1	3;1	2;0	>sp|P07901|HS90A_MOUSE Heat shock protein HSP 90-alpha OS=Mus musculus GN=Hsp90aa1 PE=1 SV=4	1	8	5	5	8	7	5	4	5	4	11.6	6.8	6.8	84.787	733	733	0	31.664	By MS/MS	By MS/MS	11.6	11.3	1236000	656160	579840	731960	679100	6	8	14	81	60;394;491;492;782;795;1097;2071	False;True;True;True;False;True;True;False	60;397;496;497;789;802;1106;2107	335;336;337;338;339;340;341;342;343;344;345;346;347;348;2893;2894;2895;2896;2897;2898;2899;3571;3572;3573;3574;3575;5711;5712;5713;5714;5828;5829;5830;5831;9065;9066;9067;9068;9069;9070;9071;16896;16897;16898;16899;16900;16901;16902;16903;16904	211;212;213;214;215;216;217;218;1882;1883;1884;1885;2227;2228;2229;2230;3385;3386;3387;3388;3450;3451;5304;5305;5306;5307;9799;9800;9801;9802;9803;9804;9805;9806	215;1883;2227;2230;3385;3451;5305;9801			1	0.927783
sp|Q62318|TIF1B_MOUSE	sp|Q62318|TIF1B_MOUSE	3	3	3	>sp|Q8VDJ3|VIGLN_MOUSE Vigilin OS=Mus musculus GN=Hdlbp PE=1 SV=1	1	20	20	20	20	19	20	19	20	19	18.8	18.8	18.8	141.74	1268	1268	0	270.89	By MS/MS	By MS/MS	18.8	17.4	13451000	7363500	6087500	7793500	7290200	37	27	64	465	13;239;378;455;496;502;650;707;814;1008;1101;1191;1224;1244;1546;1663;1743;1756;1870;1944	True;True;True;True;True;True;True;True;True;True;True;True;True;True;True;True;True;True;True;True	13;240;381;459;501;507;657;714;821;1016;1110;1201;1234;1255;1573;1691;1773;1787;1904;1978	61;62;63;64;1785;1786;1787;1788;2808;2809;2810;2811;3327;3328;3613;3614;3615;3616;3617;3618;3619;3620;3643;3644;3645;3646;3647;4726;4727;4728;4729;5087;5088;5089;5090;5091;5092;5990;5991;7631;7632;7633;7634;9088;9089;9090;9091;9092;9093;9094;9095;9664;9665;9666;9667;9668;9669;9943;9944;9945;9946;9947;9948;9949;9950;9951;10050;10051;10052;10053;10054;12704;12705;12706;12707;13647;13648;13649;13650…	55;56;57;58;1185;1839;1840;1841;2100;2247;2257;2258;2836;2837;2838;3047;3048;3049;3050;3051;3522;3523;3524;4454;5318;5319;5320;5321;5581;5582;5700;5701;5702;5748;5749;5750;5751;7347;7348;7349;7905;7906;7907;7908;7909;7910;7911;7912;7913;7914;7915;7916;8269;8270;8271;8272;8273;8344;8345;8892;8893;8894;8895;8896;8897;9258	55;1185;1841;2100;2247;2257;2837;3051;3524;4454;5319;5581;5700;5749;7348;7913;8270;8344;8893;9258	310;311	249;834	1	0.935421
sp|Q62523|ZYX_MOUSE	sp|Q62523|ZYX_MOUSE	2	2	2	>sp|Q8R1B4|EIF3C_MOUSE Eukaryotic translation initiation factor 3 subunit C OS=Mus musculus GN=Eif3c PE=1 SV=1	1	2	2	2	2	2	2	2	2	2	3.3	3.3	3.3	105.53	911	911	0	12.253	By MS/MS	By MS/MS	3.3	3.3	321720	157870	163850	188360	176550	3	4	7	461	352;1749	True;True	354;1780	2614;2615;2616;14353;14354;14355;14356	1717;1718;8326;8327;8328;8329;8330	1718;8327			1	0.937301
sp|Q64433|CH10_MOUSE	sp|Q64433|CH10_MOUSE	1	1	1	>sp|P38647|GRP75_MOUSE Stress-70 protein, mitochondrial OS=Mus musculus GN=Hspa9 PE=1 SV=3	1	8	8	8	7	7	7	7	7	7	14.7	14.7	14.7	73.46	679	679	0	137.36	By MS/MS	By MS/MS	13.4	12.4	5012400	2771500	2240900	2804500	2659300	15	11	26	160	203;347;1348;1498;1833;1936;1956;2008	True;True;True;True;True;True;True;True	204;349;1362;1513;1866;1970;1990;2043	1521;2577;2578;2579;2580;2581;2582;2583;2584;2585;10668;10669;10670;10671;10672;10673;11817;11818;11819;11820;11821;11822;11823;11824;11825;11826;11827;15052;15053;15054;15055;15056;15057;15058;15059;15932;15933;15934;15935;16045;16046;16047;16048;16049;16050;16051;16052;16053;16054;16055;16056;16057;16401;16402;16403;16404;16405;16406;16407;16408;16409;16410	1023;1695;1696;1697;1698;6062;6625;8728;8729;9238;9239;9240;9241;9290;9291;9292;9293;9294;9295;9296;9297;9493;9494;9495;9496;9497	1023;1695;6062;6625;8729;9238;9293;9494	111;112	370;389	1	0.948226
sp|Q64467|G3PT_MOUSE	sp|Q64467|G3PT_MOUSE	2	1	1	>sp|P61979|HNRPK_MOUSE Heterogeneous nuclear ribonucleoprotein K OS=Mus musculus GN=Hnrnpk PE=1 SV=1	1	3	3	3	3	3	3	3	3	3	10.4	10.4	10.4	50.976	463	463	0	18.334	By MS/MS	By MS/MS	10.4	10.4	912730	447700	465030	558990	531820	5	6	11	224	744;850;1731	True;True;True	751;857;1761	5350;5351;5352;5353;5354;6259;6260;6261;6262;6263;6264;6265;14201;14202;14203;14204;14205;14206;14207;14208	3174;3175;3682;3683;3684;3685;3686;8226;8227;8228;8229;8230	3175;3686;8227			1	0.951394
sp|Q64511|TOP2B_MOUSE	sp|Q64511|TOP2B_MOUSE	4	2	2	>sp|P62242|RS8_MOUSE 40S ribosomal protein S8 OS=Mus musculus GN=Rps8 PE=1 SV=2	1	6	6	6	6	6	6	6	6	6	29.8	29.8	29.8	24.205	208	208	0	89.365	By MS/MS	By MS/MS	29.8	29.8	11181000	6564200	4617200	3856400	3677900	29	19	48	228	53;844;904;1237;1238;1351	True;True;True;True;True;True	53;851;912;1248;1249;1365	303;304;305;306;307;308;309;310;6211;6212;6213;6214;6215;6216;6217;6218;6219;6220;6221;6222;6223;6224;6225;6226;6227;6228;6229;6230;6231;6232;6233;6234;6235;6236;6237;6675;6676;6677;6678;6679;6680;6681;6682;6683;6684;6685;6686;6687;6688;6689;6690;10001;10002;10003;10004;10005;10006;10007;10008;10009;10010;10011;10012;10013;10014;10015;10016;10017;10018;10019;10020;10021;10022;10023;10687;10688;10…	197;198;3645;3646;3647;3648;3649;3650;3651;3652;3653;3654;3655;3656;3657;3658;3659;3660;3661;3662;3663;3664;3665;3666;3904;3905;3906;3907;3908;3909;3910;3911;3912;3913;3914;3915;3916;3917;3918;5723;5724;5725;5726;6068;6069;6070;6071;6072;6073	198;3657;3917;5725;5726;6072			1	0.953713
sp|Q64523|H2A2C_MOUSE;sp|Q6GSS7|H2A2A_MOUSE	sp|Q64523|H2A2C_MOUSE;sp|Q6GSS7|H2A2A_MOUSE	5;5	1;1	1;1	>sp|P14206|RSSA_MOUSE 40S ribosomal protein SA OS=Mus musculus GN=Rpsa PE=1 SV=4	1	6	6	6	5	4	5	4	5	4	23.4	23.4	23.4	32.838	295	295	0	91.014	By MS/MS	By MS/MS	18	19.3	11168000	5564900	5603400	5271900	5035400	23	16	39	108	144;549;1011;1496;1533;2099	True;True;True;True;True;True	145;556;1019;1511;1560;2137	906;907;908;909;910;911;912;913;914;915;916;917;918;919;920;921;922;923;924;925;926;927;4044;4045;4046;4047;4048;4049;4050;4051;4052;4053;4054;4055;4056;4057;7643;11814;11815;12593;12594;12595;17173;17174;17175;17176;17177;17178;17179;17180;17181;17182	579;580;581;582;583;584;585;586;587;588;589;590;591;592;593;594;595;596;597;598;2449;2450;2451;2452;2453;2454;2455;2456;2457;2458;2459;2460;4461;6623;7296;7297;7298;9966;9967;9968;9969	594;2450;4461;6623;7298;9967	81	10	1	0.95514
sp|Q64727|VINC_MOUSE	sp|Q64727|VINC_MOUSE	12	12	12	>sp|P58252|EF2_MOUSE Elongation factor 2 OS=Mus musculus GN=Eef2 PE=1 SV=2	2	12	12	12	12	10	12	10	12	10	15.5	15.5	15.5	95.313	858	858;971	0	323.31	By MS/MS	By MS/MS	15.5	13.9	22331000	12852000	9478800	12757000	12189000	20	15	35	207	240;449;531;550;600;648;666;680;1675;1908;1914;1988	True;True;True;True;True;True;True;True;True;True;True;True	241;453;536;557;607;655;673;687;1703;1942;1948;2023	1789;1790;3272;3273;3274;3275;3276;3277;3904;3905;3906;3907;3908;3909;3910;3911;4058;4404;4405;4406;4407;4408;4409;4410;4411;4695;4696;4697;4698;4699;4700;4701;4702;4703;4704;4705;4706;4707;4708;4709;4801;4802;4803;4804;4805;4806;4807;4808;4809;4810;4811;4812;4925;4926;4927;4928;13737;15728;15729;15730;15731;15732;15733;15770;15771;15772;15773;15774;15775;15776;15777;15778;15779;16273;16274;16275…	1186;1187;2073;2074;2374;2375;2376;2377;2378;2379;2461;2665;2666;2667;2831;2832;2833;2886;2887;2960;2961;2962;7944;9134;9151;9152;9153;9154;9155;9408;9409;9410;9411;9412;9413	1186;2074;2374;2461;2665;2833;2886;2962;7944;9134;9151;9410	147;148;149	305;697;781	1	0.955475
sp|Q68FD5|CLH1_MOUSE	sp|Q68FD5|CLH1_MOUSE	4	4	4	>sp|P17182|ENOA_MOUSE Alpha-enolase OS=Mus musculus GN=Eno1 PE=1 SV=3	3	11	11	11	9	11	9	11	9	11	31.1	31.1	31.1	47.14	434	434;434;434	0	121.83	By MS/MS	By MS/MS	23	31.1	11820000	6563400	5256300	6703800	6424100	32	21	53	117	41;356;706;777;832;1028;1029;1048;1488;1991;2073	True;True;True;True;True;True;True;True;True;True;True	41;358;713;784;839;1036;1037;1056;1503;2026;2109	238;239;2646;2647;2648;2649;2650;2651;5074;5075;5076;5077;5078;5079;5080;5081;5082;5083;5084;5085;5086;5665;5666;5667;5668;5669;5670;5671;5672;5673;5674;5675;5676;5677;5678;5679;5680;5681;5682;5683;5684;5685;5686;5687;6107;6108;6109;6110;6111;6112;6113;6114;7857;7858;7859;7860;7861;7862;7863;7864;7865;7866;8037;11766;11767;16301;16302;16303;16304;16305;16306;16307;16308;16309;16310;16311;16312;16…	147;148;149;1738;1739;1740;1741;1742;1743;1744;3042;3043;3044;3045;3046;3368;3369;3370;3371;3372;3373;3599;3600;3601;3602;3603;3604;3605;4575;4576;4577;4655;4656;6600;6601;9417;9418;9419;9420;9421;9422;9423;9424;9425;9426;9427;9428;9429;9430;9431;9432;9808;9809	148;1742;3046;3372;3604;4575;4576;4655;6601;9417;9808	86;87	165;169	1	0.958277
sp|Q68FL6|SYMC_MOUSE	sp|Q68FL6|SYMC_MOUSE	2	2	2	>sp|Q61937|NPM_MOUSE Nucleophosmin OS=Mus musculus GN=Npm1 PE=1 SV=1	1	2	2	2	2	2	2	2	2	2	3.8	3.8	3.8	32.56	292	292	0	13.492	By MS/MS	By MS/MS	3.8	3.8	4693800	2237800	2456000	1050500	1010400	2	3	5	362	720;721	True;True	727;728	5158;5159;5160;5161;5162;5163;5164;5165;5166;5167;5168;5169;5170;5171;5172;5173;5174;5175;5176;5177	3081;3082;3083;3084;3085	3081;3085			1	0.961828
sp|Q69Z66|MYSM1_MOUSE	sp|Q69Z66|MYSM1_MOUSE	1	1	1	>sp|Q8VHE0|SEC63_MOUSE Translocation protein SEC63 homolog OS=Mus musculus GN=Sec63 PE=2 SV=4	1	3	3	3	3	2	3	2	3	2	4.7	4.7	4.7	87.869	760	760	0	18.297	By MS/MS	By MS/MS	4.7	3.2	328430	178330	150090	191890	184920	3	4	7	470	218;330;1219	True;True;True	219;332;1229	1634;2483;2484;2485;2486;9859;9860;9861;9862	1099;1636;1637;1638;5664;5665;5666	1099;1637;5664	314;315	367;372	1	0.963677
sp|Q69ZN7|MYOF_MOUSE	sp|Q69ZN7|MYOF_MOUSE	3	3	3	>sp|Q61029|LAP2B_MOUSE Lamina-associated polypeptide 2, isoforms beta/delta/epsilon/gamma OS=Mus musculus GN=Tmpo PE=1 SV=4;>sp|Q61033|LAP2A_MOUSE Lamina-associated polypeptide 2, isoforms alpha/zeta OS=Mus musculus GN=Tmpo PE=1 SV=4	2	7	7	7	7	6	7	6	7	6	24.3	24.3	24.3	50.372	452	452;693	0	45.426	By MS/MS	By MS/MS	24.3	20.8	3916800	2275100	1641600	2222300	2144400	15	16	31	345	270;717;813;1401;1512;1662;2066	True;True;True;True;True;True;True	272;724;820;1415;1530;1690;2102	2037;2038;2039;2040;2041;2042;2043;2044;2045;2046;5150;5151;5152;5153;5978;5979;5980;5981;5982;5983;5984;5985;5986;5987;5988;5989;11076;11077;11078;11079;11080;11081;11082;11083;12031;12032;12033;13643;13644;13645;13646;16869;16870;16871;16872;16873;16874;16875	1359;1360;1361;1362;1363;1364;3076;3077;3078;3512;3513;3514;3515;3516;3517;3518;3519;3520;3521;6259;6260;6261;6262;6263;6796;6797;7902;7903;7904;9784;9785;9786	1364;3078;3518;6259;6796;7903;9785			1	0.964946
sp|Q6DFW4|NOP58_MOUSE	sp|Q6DFW4|NOP58_MOUSE	6	6	6	>sp|P62270|RS18_MOUSE 40S ribosomal protein S18 OS=Mus musculus GN=Rps18 PE=1 SV=3	1	7	7	7	6	5	6	5	6	5	42.1	42.1	42.1	17.718	152	152	0	67.078	By MS/MS	By MS/MS	33.6	28.3	3308600	2117600	1190900	894690	864120	11	8	19	232	97;804;1455;1605;1941;1969;2097	True;True;True;True;True;True;True	98;811;1470;1633;1975;2003;2135	612;613;614;615;616;617;618;619;5894;5895;5896;5897;5898;5899;11482;11483;11484;11485;11486;11487;11488;11489;13236;13237;15952;15953;15954;15955;16140;17163;17164	397;398;399;3476;6456;6457;6458;6459;6460;6461;6462;7694;9249;9250;9251;9252;9348;9963;9964	398;3476;6459;7694;9250;9348;9963	167	71	1	0.965832
sp|Q6IRU2|TPM4_MOUSE	sp|Q6IRU2|TPM4_MOUSE	1	1	1	>sp|P25444|RS2_MOUSE 40S ribosomal protein S2 OS=Mus musculus GN=Rps2 PE=2 SV=3	1	4	4	4	4	2	4	2	4	2	16	16	16	31.231	293	293	0	29.187	By MS/MS	By MS/MS	16	7.8	2720800	1120900	1599900	1551000	1518300	6	4	10	135	279;753;992;1632	True;True;True;True	281;760;1000;1660	2103;5498;5499;5500;5501;5502;7513;13407;13408;13409;13410;13411;13412;13413;13414;13415;13416;13417;13418;13419;13420;13421	1385;3257;3258;3259;3260;3261;3262;4404;7776;7777	1385;3257;4404;7777	100;101	215;216	1	0.978917
sp|Q6NZJ6|IF4G1_MOUSE	sp|Q6NZJ6|IF4G1_MOUSE	2	2	2	>sp|P05202|AATM_MOUSE Aspartate aminotransferase, mitochondrial OS=Mus musculus GN=Got2 PE=1 SV=1	1	6	6	6	5	5	5	5	5	5	15.8	15.8	15.8	47.411	430	430	0	159.11	By MS/MS	By MS/MS	14	13	4149900	3488200	661690	1459800	1429900	12	12	24	76	241;346;610;800;940;1916	True;True;True;True;True;True	242;348;617;807;948;1950	1791;1792;1793;1794;1795;1796;1797;1798;1799;1800;1801;2573;2574;2575;2576;4493;4494;4495;4496;4497;4498;4499;4500;4501;4502;4503;5865;5866;6957;6958;6959;6960;6961;6962;15795	1188;1189;1190;1191;1192;1193;1194;1195;1196;1197;1198;1693;1694;2716;2717;2718;2719;2720;2721;3468;3469;4061;4062;9166	1193;1694;2720;3469;4061;9166	64	174	1	0.979518
sp|Q6PB66|LPPRC_MOUSE	sp|Q6PB66|LPPRC_MOUSE	3	3	3	>sp|P99024|TBB5_MOUSE Tubulin beta-5 chain OS=Mus musculus GN=Tubb5 PE=1 SV=1;>sp|Q9CWF2|TBB2B_MOUSE Tubulin beta-2B chain OS=Mus musculus GN=Tubb2b PE=1 SV=1;>sp|Q7TMM9|TBB2A_MOUSE Tubulin beta-2A chain OS=Mus musculus GN=Tubb2a PE=1 SV=1	5	8	8	2	8	8	8	8	2	2	20	20	6.1	49.67	444	444;445;445;451;536	0	100.52	By MS/MS	By MS/MS	20	20	10925000	5832400	5092400	5158600	5098300	25	25	50	295	134;198;536;880;907;1057;1328;2082	True;True;True;True;True;True;True;True	135;199;541;542;887;888;915;1065;1066;1341;2118	853;854;855;856;857;858;859;860;861;862;863;864;865;866;1469;1470;1471;1472;1473;1474;1475;1476;3945;3946;3947;3948;3949;3950;3951;3952;3953;6496;6497;6498;6499;6500;6501;6502;6503;6504;6505;6506;6507;6508;6509;6707;6708;6709;6710;6711;6712;6713;6714;6715;6716;6717;6718;8091;8092;8093;8094;8095;8096;8097;8098;8099;8100;8101;8102;8103;8104;8105;8106;8107;8108;8109;8110;8111;8112;8113;8114;8115;811…	548;549;550;551;552;553;977;978;979;980;981;982;2404;2405;2406;2407;2408;2409;2410;2411;2412;3821;3822;3823;3824;3825;3826;3932;3933;3934;3935;3936;4678;4679;4680;4681;4682;4683;4684;4685;4686;5967;5968;5969;5970;5971;5972;5973;5974;5975;5976;9828	551;981;2409;3826;3933;4679;5969;9828	191;192;193;194;195;204	73;164;257;321;323;330	1	0.988311
sp|Q6PDQ2|CHD4_MOUSE;sp|A2A8L1|CHD5_MOUSE	sp|Q6PDQ2|CHD4_MOUSE	3;1	3;1	3;1	>sp|P20152|VIME_MOUSE Vimentin OS=Mus musculus GN=Vim PE=1 SV=3	3	20	19	17	20	18	19	17	17	15	44.6	43.1	39.5	53.687	466	466;469;475	0	140.5	By MS/MS	By MS/MS	44.6	39.5	27925000	15362000	12564000	15275000	15166000	35	35	70	128	369;441;528;546;552;553;576;867;868;1025;1138;1176;1269;1270;1433;1454;1611;1705;1805;1904	True;True;True;True;True;True;False;True;True;True;True;True;True;True;True;True;True;True;True;True	372;445;533;553;559;560;583;874;875;1033;1147;1186;1280;1281;1448;1469;1639;1734;1837;1938	2773;2774;2775;2776;2777;3221;3222;3223;3884;3885;3886;3887;3888;3889;3890;3891;3892;4020;4021;4022;4023;4024;4025;4026;4027;4028;4029;4030;4031;4032;4064;4065;4066;4067;4068;4069;4070;4071;4072;4073;4074;4075;4076;4077;4078;4079;4080;4081;4082;4083;4084;4085;4086;4219;4220;4221;4222;4223;4224;4225;4226;4227;4228;4229;4230;6429;6430;6431;6432;6433;6434;6435;6436;6437;6438;6439;6440;6441;6442;6443…	1821;1822;1823;1824;2047;2364;2365;2366;2442;2443;2444;2445;2446;2464;2465;2466;2467;2468;2469;2470;2471;2472;2473;2474;2475;2476;2553;2554;2555;3771;3772;3773;3774;3775;3776;3777;3778;3779;3780;3781;3782;3783;4566;4567;4568;4569;5451;5452;5535;5821;5822;5823;5824;5825;6384;6455;7720;7721;8128;8607;8608;8609;8610;8611;8612;9117;9118;9119;9120;9121;9122;9123;9124	1822;2047;2364;2444;2466;2473;2553;3772;3779;4566;5451;5535;5824;5825;6384;6455;7721;8128;8610;9123	93;94;95;96	183;372;376;391	1	0.992864
sp|Q6URW6|MYH14_MOUSE	sp|Q6URW6|MYH14_MOUSE	3	1	1	>sp|P60335|PCBP1_MOUSE Poly(rC)-binding protein 1 OS=Mus musculus GN=Pcbp1 PE=1 SV=1;>sp|P57722|PCBP3_MOUSE Poly(rC)-binding protein 3 OS=Mus musculus GN=Pcbp3 PE=2 SV=3	2	4	4	2	4	4	4	4	2	2	16.9	16.9	8.1	37.497	356	356;371	0	48.378	By MS/MS	By MS/MS	16.9	16.9	2308600	1255000	1053600	1307200	1298100	13	13	26	212	141;521;857;883	True;True;True;True	142;526;864;891	893;894;895;896;897;898;899;3833;3834;3835;3836;3837;3838;3839;3840;3841;3842;3843;3844;6307;6308;6309;6310;6311;6312;6313;6314;6315;6316;6521;6522;6523;6524;6525;6526;6527;6528;6529;6530;6531;6532	571;572;2337;2338;2339;2340;2341;2342;2343;2344;3716;3717;3718;3719;3720;3721;3722;3723;3724;3834;3835;3836;3837;3838;3839;3840;3841	572;2340;3723;3841	153	137	1	0.993039
sp|Q6YND2|ZN653_MOUSE	sp|Q6YND2|ZN653_MOUSE	1	1	1	>sp|Q60668|HNRPD_MOUSE Heterogeneous nuclear ribonucleoprotein D0 OS=Mus musculus GN=Hnrnpd PE=1 SV=2	1	2	2	2	2	2	2	2	2	2	6.8	6.8	6.8	38.354	355	355	0	14.212	By MS/MS	By MS/MS	6.8	6.8	2255300	1193100	1062200	1039600	1034100	9	5	14	334	565;831	True;True	572;838	4150;4151;4152;4153;4154;4155;4156;4157;4158;4159;4160;4161;4162;4163;4164;4165;6096;6097;6098;6099;6100;6101;6102;6103;6104;6105;6106	2508;2509;3587;3588;3589;3590;3591;3592;3593;3594;3595;3596;3597;3598	2509;3590			1	0.99471
sp|Q6ZQ38|CAND1_MOUSE	sp|Q6ZQ38|CAND1_MOUSE	8	8	8	>sp|P51881|ADT2_MOUSE ADP/ATP translocase 2 OS=Mus musculus GN=Slc25a5 PE=1 SV=3	1	2	2	2	2	2	2	2	2	2	7.4	7.4	7.4	32.931	298	298	0	13.083	By MS/MS	By MS/MS	7.4	7.4	1445800	898790	547040	534540	533380	3	3	6	191	363;1720	True;True	366;1750	2726;2727;2728;2729;2730;2731;2732;2733;2734;2735;2736;2737;2738;2739;2740;14144;14145;14146;14147;14148;14149;14150;14151;14152;14153	1805;8197;8198;8199;8200;8201	1805;8197			1	0.99783
sp|Q6ZQ58|LARP1_MOUSE	sp|Q6ZQ58|LARP1_MOUSE	1	1	1	>sp|P84244|H33_MOUSE Histone H3.3 OS=Mus musculus GN=H3f3a PE=1 SV=2;>sp|P84228|H32_MOUSE Histone H3.2 OS=Mus musculus GN=Hist1h3b PE=1 SV=2;>sp|P68433|H31_MOUSE Histone H3.1 OS=Mus musculus GN=Hist1h3a PE=1 SV=2;>sp|P02301|H3C_MOUSE Histone H3.3C OS=Mus m	4	4	4	4	4	4	4	4	4	4	22.8	22.8	22.8	15.328	136	136;136;136;136	0	24.838	By MS/MS	By MS/MS	22.8	22.8	122410000	73342000	49069000	35920000	35847000	7	6	13	73	456;1668;1669;2029	True;True;True;True	460;1696;1697;2064	3329;3330;3331;3332;3333;3334;3335;3336;3337;3338;3339;3340;3341;3342;3343;3344;3345;3346;3347;3348;3349;3350;3351;3352;3353;3354;3355;3356;3357;3358;3359;3360;13679;13680;13681;13682;13683;13684;13685;13686;13687;13688;13689;13690;13691;13692;13693;13694;13695;13696;13697;13698;13699;13700;13701;13702;13703;13704;13705;13706;16568;16569;16570;16571	2101;2102;2103;2104;2105;2106;7925;7926;7927;7928;7929;7930;9590	2105;7925;7930;9590	62	121	1	0.997968
sp|Q6ZQ88|KDM1A_MOUSE	sp|Q6ZQ88|KDM1A_MOUSE	1	1	1	>sp|Q9Z1Q5|CLIC1_MOUSE Chloride intracellular channel protein 1 OS=Mus musculus GN=Clic1 PE=1 SV=3	1	3	3	3	3	3	3	3	3	3	17.4	17.4	17.4	27.013	241	241	0	27.409	By MS/MS	By MS/MS	17.4	17.4	1119100	615690	503410	298650	298140	9	7	16	596	71;1036;1408	True;True;True	71;1044;1422	435;436;437;438;439;440;441;442;443;444;445;446;447;448;449;450;7930;7931;7932;7933;7934;7935;7936;7937;7938;11149;11150;11151;11152;11153;11154;11155;11156;11157	283;284;285;286;287;288;4592;4593;4594;4595;4596;4597;4598;4599;6306;6307	287;4597;6307			1	0.998292
sp|Q6ZWN5|RS9_MOUSE	sp|Q6ZWN5|RS9_MOUSE	2	2	2	>sp|Q9QUR6|PPCE_MOUSE Prolyl endopeptidase OS=Mus musculus GN=Prep PE=2 SV=1	1	3	3	3	3	3	3	3	3	3	5.4	5.4	5.4	80.751	710	710	0	23.583	By MS/MS	By MS/MS	5.4	5.4	6134500	4928500	1206000	3274400	3280500	7	4	11	577	95;1910;1983	True;True;True	96;1944;2017	598;599;600;601;602;603;15741;15742;15743;16240;16241;16242;16243;16244;16245;16246;16247	387;9138;9139;9140;9385;9386;9387;9388;9389;9390;9391	387;9138;9389			0.998141	1
sp|Q6ZWY3|RS27L_MOUSE;sp|Q6ZWU9|RS27_MOUSE	sp|Q6ZWY3|RS27L_MOUSE;sp|Q6ZWU9|RS27_MOUSE	1;1	1;1	1;1	>sp|Q9D8N0|EF1G_MOUSE Elongation factor 1-gamma OS=Mus musculus GN=Eef1g PE=1 SV=3	1	7	7	7	7	7	7	7	7	7	17.8	17.8	17.8	50.06	437	437	0	90.259	By MS/MS	By MS/MS	17.8	17.8	22546000	12084000	10462000	12806000	12887000	33	31	64	543	9;180;865;935;966;988;1671	True;True;True;True;True;True;True	9;181;872;943;974;996;1699	42;43;44;45;46;47;48;49;50;51;1376;1377;1378;1379;1380;1381;1382;1383;1384;1385;1386;1387;1388;1389;1390;1391;1392;1393;6405;6406;6407;6408;6409;6410;6411;6412;6413;6414;6415;6416;6417;6418;6419;6420;6421;6422;6423;6424;6425;6920;6921;6922;6923;6924;6925;6926;7308;7309;7310;7311;7312;7313;7314;7315;7477;7478;7479;7480;7481;7482;7483;7484;7485;7486;7487;7488;7489;7490;7491;7492;7493;7494;7495;7496…	34;35;36;37;38;39;40;41;42;43;44;45;902;903;904;905;906;907;908;909;910;911;912;913;914;915;916;917;3764;3765;3766;3767;3768;3769;4042;4043;4044;4045;4046;4047;4048;4049;4305;4379;4380;4381;4382;4383;4384;4385;4386;4387;4388;4389;4390;4391;4392;4393;4394;4395;4396;4397;4398;7940	38;909;3764;4046;4305;4384;7940	349	263	0.993715	1
sp|Q6ZWV3|RL10_MOUSE	sp|Q6ZWV3|RL10_MOUSE	2	2	2	>sp|Q922Q8|LRC59_MOUSE Leucine-rich repeat-containing protein 59 OS=Mus musculus GN=Lrrc59 PE=1 SV=1	1	4	4	4	4	4	4	4	4	4	14.7	14.7	14.7	34.877	307	307	0	26.405	By MS/MS	By MS/MS	14.7	14.7	8847500	4691500	4156000	2739300	2762100	12	11	23	494	299;1185;1248;1256	True;True;True;True	301;1195;1259;1267	2243;2244;2245;2246;2247;2248;2249;2250;2251;2252;2253;2254;2255;2256;2257;9634;9635;9636;9637;9638;9639;9640;9641;9642;9643;9644;9645;9646;9647;9648;10080;10081;10082;10083;10084;10085;10086;10087;10088;10089;10090;10091;10092;10093;10094;10095;10145;10146;10147;10148;10149;10150;10151;10152;10153;10154;10155;10156;10157;10158;10159;10160	1491;1492;1493;1494;1495;1496;1497;1498;5560;5561;5562;5563;5564;5565;5763;5764;5765;5766;5767;5792;5793;5794;5795;5796	1492;5564;5763;5792			0.991745	1
sp|Q6ZWV7|RL35_MOUSE	sp|Q6ZWV7|RL35_MOUSE	1	1	1	>sp|P68373|TBA1C_MOUSE Tubulin alpha-1C chain OS=Mus musculus GN=Tuba1c PE=1 SV=1;>sp|P68369|TBA1A_MOUSE Tubulin alpha-1A chain OS=Mus musculus GN=Tuba1a PE=1 SV=1;>sp|P05213|TBA1B_MOUSE Tubulin alpha-1B chain OS=Mus musculus GN=Tuba1b PE=1 SV=2;>sp|P05214	6	7	7	7	7	7	7	7	7	7	21.6	21.6	21.6	49.909	449	449;451;451;450;448;449	0	62.957	By MS/MS	By MS/MS	21.6	21.6	12181000	6250600	5930500	6639800	6752600	22	20	42	77	311;417;440;460;841;1772;1922	True;True;True;True;True;True;True	313;420;444;464;848;1804;1956	2356;2357;2358;2359;2360;2361;2362;2363;2364;2365;2366;2367;2368;2369;3049;3050;3051;3052;3053;3054;3055;3056;3057;3058;3059;3060;3215;3216;3217;3218;3219;3220;3379;3380;3381;3382;3383;3384;3385;3386;3387;3388;3389;3390;3391;3392;3393;3394;6173;6174;6175;6176;6177;14499;14500;14501;14502;14503;14504;14505;14506;15846;15847;15848;15849;15850;15851;15852;15853;15854;15855;15856;15857;15858;15859;15…	1549;1550;1551;1552;1553;1554;1555;1556;1557;1558;1559;1560;1561;1562;1563;1564;1565;1566;1567;1568;1965;1966;1967;1968;1969;1970;1971;2045;2046;2134;2135;2136;2137;3630;8401;8402;8403;8404;9198;9199;9200;9201;9202;9203	1551;1968;2046;2135;3630;8402;9198			0.983295	1
sp|Q6ZWX6|IF2A_MOUSE	sp|Q6ZWX6|IF2A_MOUSE	2	2	2	>sp|P48678|LMNA_MOUSE Prelamin-A/C OS=Mus musculus GN=Lmna PE=1 SV=2	1	23	23	23	23	21	23	21	23	21	38.5	38.5	38.5	74.237	665	665	0	323.31	By MS/MS	By MS/MS	38.5	34.7	37647000	20464000	17184000	19875000	20269000	71	52	123	182	20;227;427;450;816;1039;1071;1072;1177;1181;1190;1198;1321;1407;1535;1588;1649;1689;1712;1713;1841;1873;1874	True;True;True;True;True;True;True;True;True;True;True;True;True;True;True;True;True;True;True;True;True;True;True	20;228;431;454;823;1047;1080;1081;1187;1191;1200;1208;1334;1421;1562;1616;1677;1718;1741;1742;1743;1874;1907;1908	104;105;106;107;108;1686;1687;1688;1689;1690;1691;1692;1693;1694;1695;1696;1697;1698;1699;3134;3135;3136;3137;3138;3139;3140;3278;3279;3280;3281;3282;3283;3284;3285;3286;3287;3288;5993;5994;5995;5996;5997;5998;5999;6000;6001;6002;6003;6004;7944;7945;7946;7947;7948;7949;7950;7951;7952;7953;7954;7955;7956;8206;8207;8208;8209;8210;8211;8212;8213;8214;8215;8216;8217;8218;8219;8220;8221;8222;8223;8224…	71;72;73;74;1116;1117;1118;1119;1120;1121;1122;1123;2005;2075;2076;2077;3526;3527;3528;3529;3530;3531;3532;3533;3534;3535;3536;4604;4605;4606;4607;4608;4609;4610;4611;4612;4613;4614;4615;4724;4725;5536;5537;5538;5539;5544;5577;5578;5579;5580;5601;5602;5603;5946;5947;5948;5949;5950;5951;6294;6295;6296;6297;6298;6299;6300;6301;6302;6303;6304;6305;7305;7306;7307;7626;7627;7628;7629;7630;7631;7851;80…	72;1118;2005;2077;3527;4609;4724;4725;5537;5544;5580;5601;5947;6298;7307;7628;7851;8054;8171;8179;8747;9003;9012	124;125	352;540	0.980561	1
sp|Q78PY7|SND1_MOUSE	sp|Q78PY7|SND1_MOUSE	10	10	10	>sp|O55143|AT2A2_MOUSE Sarcoplasmic/endoplasmic reticulum calcium ATPase 2 OS=Mus musculus GN=Atp2a2 PE=1 SV=2	3	5	5	5	5	5	5	5	5	5	7.1	7.1	7.1	114.86	1044	1044;994;1038	0	47.244	By MS/MS	By MS/MS	7.1	7.1	1506800	649040	857770	758750	774900	8	11	19	56	202;835;1510;1892;1917	True;True;True;True;True	203;842;1528;1926;1951	1517;1518;1519;1520;6132;6133;6134;6135;12012;12013;12014;12015;12016;15628;15629;15630;15631;15796;15797;15798;15799;15800	1021;1022;3618;3619;3620;6790;6791;6792;6793;6794;9082;9083;9084;9085;9086;9167;9168;9169;9170	1022;3618;6791;9082;9167	51;52	220;719	0.979159	1
sp|Q78XF5|OSTC_MOUSE	sp|Q78XF5|OSTC_MOUSE	1	1	1	>sp|Q8CGP2|H2B1P_MOUSE Histone H2B type 1-P OS=Mus musculus GN=Hist1h2bp PE=1 SV=3;>sp|Q6ZWY9|H2B1C_MOUSE Histone H2B type 1-C/E/G OS=Mus musculus GN=Hist1h2bc PE=1 SV=3;>sp|Q64525|H2B2B_MOUSE Histone H2B type 2-B OS=Mus musculus GN=Hist2h2bb PE=1 SV=3;>sp	12	9	9	9	7	9	7	9	7	9	57.9	57.9	57.9	13.992	126	126;126;126;126;126;126;126;126;126;126;127;126	0	165.56	By MS/MS	By MS/MS	49.2	57.9	226120000	123160000	102950000	67067000	68799000	28	29	57	95	201;321;463;965;1044;1151;1451;1646;1963	True;True;True;True;True;True;True;True;True	202;323;467;973;1052;1160;1466;1674;1997	1495;1496;1497;1498;1499;1500;1501;1502;1503;1504;1505;1506;1507;1508;1509;1510;1511;1512;1513;1514;1515;1516;2423;3405;3406;3407;3408;3409;3410;3411;3412;3413;3414;3415;3416;3417;3418;3419;3420;7303;7304;7305;7306;7307;7988;7989;7990;7991;7992;7993;7994;7995;7996;7997;7998;9433;9434;9435;9436;9437;9438;9439;9440;9441;9442;9443;9444;9445;9446;9447;9448;11444;11445;11446;11447;11448;11449;11450;11…	991;992;993;994;995;996;997;998;999;1000;1001;1002;1003;1004;1005;1006;1007;1008;1009;1010;1011;1012;1013;1014;1015;1016;1017;1018;1019;1020;1595;2141;2142;2143;2144;2145;2146;4300;4301;4302;4303;4304;4634;4635;5476;6442;6443;6444;6445;6446;6447;6448;6449;6450;6451;7839;7840;9333;9334	1019;1595;2141;4301;4635;5476;6444;7839;9333	71;72	60;63	0.974825	1
sp|Q7TMK9|HNRPQ_MOUSE	sp|Q7TMK9|HNRPQ_MOUSE	1	1	1	>sp|P80315|TCPD_MOUSE T-complex protein 1 subunit delta OS=Mus musculus GN=Cct4 PE=1 SV=3	1	5	5	5	5	5	5	5	5	5	11.9	11.9	11.9	58.066	539	539	0	32.921	By MS/MS	By MS/MS	11.9	11.9	836080	452640	383430	490050	505980	6	3	9	280	181;681;837;1758;1931	True;True;True;True;True	182;688;844;1789;1965	1394;1395;1396;1397;1398;4929;4930;4931;4932;4933;4934;6150;6151;6152;6153;14406;14407;14408;15905;15906;15907;15908	918;919;920;921;2963;3622;8353;8354;9221;9222	918;2963;3622;8353;9222			0.968517	1
sp|Q7TNC4|LC7L2_MOUSE	sp|Q7TNC4|LC7L2_MOUSE	2	2	2	>sp|Q8JZQ9|EIF3B_MOUSE Eukaryotic translation initiation factor 3 subunit B OS=Mus musculus GN=Eif3b PE=1 SV=1	1	4	4	4	4	3	4	3	4	3	8.8	8.8	8.8	91.369	803	803	0	30.032	By MS/MS	By MS/MS	8.8	5.6	232510	109280	123230	132120	136830	8	4	12	453	154;679;762;906	True;True;True;True	155;686;769;914	1053;4920;4921;4922;4923;4924;5578;5579;5580;5581;6704;6705;6706	652;2954;2955;2956;2957;2958;2959;3304;3305;3306;3307;3931	652;2955;3304;3931			0.965578	1
sp|Q7TPR4|ACTN1_MOUSE;sp|Q9JI91|ACTN2_MOUSE;sp|O88990|ACTN3_MOUSE	sp|Q7TPR4|ACTN1_MOUSE	6;1;1	3;0;0	3;0;0	>sp|Q9D0I9|SYRC_MOUSE Arginine--tRNA ligase, cytoplasmic OS=Mus musculus GN=Rars PE=2 SV=2	1	5	5	5	5	4	5	4	5	4	9.8	9.8	9.8	75.673	660	660	0	29.49	By MS/MS	By MS/MS	9.8	7.4	767110	423410	343700	436850	453930	5	3	8	533	31;922;1495;1674;1942	True;True;True;True;True	31;930;1510;1702;1976	181;182;183;6798;6799;6800;6801;6802;6803;6804;11812;11813;13732;13733;13734;13735;13736;15956;15957;15958;15959;15960;15961	121;122;3982;3983;6621;6622;7943;9253	121;3983;6621;7943;9253	343	221	0.962373	1
sp|Q7TPV4|MBB1A_MOUSE	sp|Q7TPV4|MBB1A_MOUSE	11	11	11	>sp|P40142|TKT_MOUSE Transketolase OS=Mus musculus GN=Tkt PE=1 SV=1	1	4	4	4	4	4	4	4	4	4	9.3	9.3	9.3	67.63	623	623	0	44.828	By MS/MS	By MS/MS	9.3	9.3	2497800	1426700	1071100	1364000	1428100	12	7	19	163	309;863;1058;1825	True;True;True;True	311;870;1067;1858	2331;2332;2333;2334;2335;2336;2337;2338;2339;6380;6381;6382;6383;6384;6385;6386;6387;6388;6389;6390;6391;6392;8117;8118;8119;8120;8121;8122;8123;15003;15004;15005;15006;15007	1541;1542;1543;1544;3744;3745;3746;3747;3748;3749;3750;3751;3752;3753;3754;3755;3756;4687;8707	1542;3747;4687;8707			0.955115	1
sp|Q7TQI3|OTUB1_MOUSE	sp|Q7TQI3|OTUB1_MOUSE	1	1	1	>sp|P08113|ENPL_MOUSE Endoplasmin OS=Mus musculus GN=Hsp90b1 PE=1 SV=2	1	5	3	3	5	5	3	3	3	3	6.2	4.5	4.5	92.475	802	802	0	24.255	By MS/MS	By MS/MS	6.2	6.2	1788000	1068600	719470	998810	1048600	4	3	7	82	375;489;490;781;1556	True;False;False;True;True	378;494;495;788;1583	2799;2800;2801;3560;3561;3562;3563;3564;3565;3566;3567;3568;3569;3570;5705;5706;5707;5708;5709;5710;12820;12821;12822;12823;12824;12825	1834;2224;2225;2226;3383;3384;7427;7428;7429;7430	1834;2224;2225;3383;7427			0.952518	1
sp|Q80TM6|R3HD2_MOUSE	sp|Q80TM6|R3HD2_MOUSE	1	1	1	>sp|P18760|COF1_MOUSE Cofilin-1 OS=Mus musculus GN=Cfl1 PE=1 SV=3	2	5	5	5	4	4	4	4	4	4	32.5	32.5	32.5	18.559	166	166;166	0	33.519	By MS/MS	By MS/MS	28.9	25.9	8289500	4268800	4020800	2631300	2788300	14	14	28	123	250;251;312;1096;2053	True;True;True;True;True	251;252;314;1105;2089	1864;1865;1866;1867;1868;1869;1870;1871;1872;1873;1874;1875;1876;1877;1878;1879;1880;1881;1882;1883;1884;2370;2371;9053;9054;9055;9056;9057;9058;9059;9060;9061;9062;9063;9064;16736;16737;16738;16739;16740;16741;16742;16743;16744;16745	1261;1262;1263;1264;1265;1266;1267;1268;1269;1270;1271;1272;1273;1274;1275;1276;1277;1278;1279;1569;5301;5302;5303;9701;9702;9703;9704;9705;9706	1271;1279;1569;5301;9704	91	18	0.943693	1
sp|Q80UE6|WNK4_MOUSE	sp|Q80UE6|WNK4_MOUSE	1	1	1	>sp|P27659|RL3_MOUSE 60S ribosomal protein L3 OS=Mus musculus GN=Rpl3 PE=1 SV=3	1	2	2	2	2	2	2	2	2	2	5.2	5.2	5.2	46.109	403	403	0	14.015	By MS/MS	By MS/MS	5.2	5.2	1270000	818160	451860	605020	642310	4	2	6	143	791;1393	True;True	798;1407	5795;5796;5797;5798;5799;5800;11025;11026;11027;11028;11029;11030;11031;11032	3438;6228;6229;6230;6231;6232	3438;6232			0.941944	1
sp|Q80WJ7|LYRIC_MOUSE	sp|Q80WJ7|LYRIC_MOUSE	4	4	4	>sp|P84099|RL19_MOUSE 60S ribosomal protein L19 OS=Mus musculus GN=Rpl19 PE=1 SV=1	1	3	3	3	3	3	3	3	3	3	18.4	18.4	18.4	23.466	196	196	0	58.425	By MS/MS	By MS/MS	18.4	18.4	2326400	1290000	1036400	1203100	1278300	6	4	10	286	1123;1796;2044	True;True;True	1132;1828;2080	9221;9222;9223;9224;9225;9226;9227;9228;9229;9230;9231;9232;9233;14721;14722;14723;14724;16679;16680;16681;16682	5360;5361;5362;5363;8543;9672;9673;9674;9675;9676	5362;8543;9672			0.941172	1
sp|Q80X90|FLNB_MOUSE	sp|Q80X90|FLNB_MOUSE	20	18	16	>sp|P20029|GRP78_MOUSE 78 kDa glucose-regulated protein OS=Mus musculus GN=Hspa5 PE=1 SV=3	1	10	8	8	10	8	8	6	8	6	20.2	16	16	72.421	655	655	0	71.054	By MS/MS	By MS/MS	20.2	16.2	1798800	989670	809160	951320	1019800	11	8	19	127	349;485;851;911;914;1396;1497;1638;1851;1900	True;True;False;True;True;True;True;True;True;False	351;490;858;919;922;1410;1512;1666;1885;1934	2602;2603;2604;2605;2606;3552;3553;6266;6267;6268;6269;6270;6271;6272;6273;6274;6275;6276;6277;6278;6279;6280;6731;6732;6733;6734;6735;6736;6737;6738;6739;6747;6748;6749;6750;6751;6752;11048;11049;11050;11051;11052;11053;11054;11055;11816;13455;13456;13457;13458;13459;13460;13461;13462;15237;15238;15239;15663;15664;15665;15666;15667;15668;15669;15670;15671;15672;15673	1712;2217;2218;3687;3688;3689;3690;3691;3692;3693;3694;3695;3944;3947;3948;6240;6241;6242;6624;7797;7798;7799;7800;7801;7802;7803;7804;8805;9099;9100;9101;9102;9103;9104;9105;9106;9107;9108	1712;2218;3691;3944;3947;6240;6624;7797;8805;9108	92	197	0.93285	1
sp|Q80Y44|DDX10_MOUSE	sp|Q80Y44|DDX10_MOUSE	1	1	1	>sp|Q6ZQ38|CAND1_MOUSE Cullin-associated NEDD8-dissociated protein 1 OS=Mus musculus GN=Cand1 PE=2 SV=2	1	8	8	8	8	6	8	6	8	6	8.6	8.6	8.6	136.33	1230	1230	0	100.23	By MS/MS	By MS/MS	8.6	6.5	1176700	695640	481080	646430	693380	13	5	18	389	194;243;300;452;602;916;1692;1853	True;True;True;True;True;True;True;True	195;244;302;456;609;924;1721;1887	1455;1456;1457;1458;1459;1811;2258;3294;3295;3296;3297;4413;4414;4415;4416;6757;6758;6759;6760;6761;13930;13931;13932;13933;15249;15250;15251	965;966;967;968;1203;1499;2081;2082;2669;3951;3952;3953;8061;8062;8063;8064;8818;8819;8820	966;1203;1499;2082;2669;3952;8064;8818			0.932288	1
sp|Q8BFY9|TNPO1_MOUSE;sp|Q99LG2|TNPO2_MOUSE	sp|Q8BFY9|TNPO1_MOUSE	3;1	3;1	3;1	>sp|P47963|RL13_MOUSE 60S ribosomal protein L13 OS=Mus musculus GN=Rpl13 PE=2 SV=3	1	10	10	10	9	9	9	9	9	9	39.8	39.8	39.8	24.305	211	211	0	70.846	By MS/MS	By MS/MS	38.9	39.8	6503100	3646500	2856700	3272000	3515000	18	12	30	180	145;426;660;968;1056;1376;1670;1773;1895;1939	True;True;True;True;True;True;True;True;True;True	146;430;667;976;1064;1390;1698;1805;1929;1973	928;929;930;931;932;933;934;935;936;937;938;939;940;941;3130;3131;3132;3133;4762;4763;4764;4765;4766;4767;4768;4769;7324;7325;7326;7327;7328;7329;8081;8082;8083;8084;8085;8086;8087;8088;8089;8090;10942;10943;10944;10945;13707;13708;13709;13710;13711;13712;13713;13714;13715;13716;13717;13718;14507;14508;14509;14510;14511;14512;14513;14514;15647;15648;15649;15650;15651;15939;15940;15941;15942;15943	599;600;601;602;2003;2004;2864;2865;2866;4308;4309;4674;4675;4676;4677;6184;7931;7932;7933;7934;7935;7936;7937;7938;7939;8405;8406;9093;9244;9245	601;2003;2864;4308;4676;6184;7936;8406;9093;9244	123	155	0.930868	1
sp|Q8BFZ3|ACTBL_MOUSE	sp|Q8BFZ3|ACTBL_MOUSE	6	1	1	>sp|Q9Z0N1|IF2G_MOUSE Eukaryotic translation initiation factor 2 subunit 3, X-linked OS=Mus musculus GN=Eif2s3x PE=1 SV=2	2	3	3	3	3	3	3	3	3	3	8.7	8.7	8.7	51.065	472	472;472	0	20.536	By MS/MS	By MS/MS	8.7	8.7	739390	379730	359660	420920	453210	7	7	14	592	100;780;926	True;True;True	101;787;934	644;645;646;647;648;649;650;5699;5700;5701;5702;5703;5704;6831;6832;6833;6834;6835;6836;6837	421;422;423;424;425;426;427;3381;3382;3993;3994;3995;3996;3997	422;3381;3997			0.928753	1
sp|Q8BG32|PSD11_MOUSE	sp|Q8BG32|PSD11_MOUSE	2	2	2	>sp|P05064|ALDOA_MOUSE Fructose-bisphosphate aldolase A OS=Mus musculus GN=Aldoa PE=1 SV=2	1	4	4	4	2	4	2	4	2	4	14.6	14.6	14.6	39.355	364	364	0	125.32	By MS/MS	By MS/MS	6.9	14.6	2138000	1282400	855610	1171300	1265700	7	8	15	75	163;503;682;833	True;True;True;True	164;508;689;840	1250;1251;1252;1253;1254;1255;1256;1257;1258;1259;3648;4935;4936;4937;4938;4939;4940;4941;4942;4943;6115	816;817;818;819;820;821;822;2259;2964;2965;2966;2967;2968;2969;3606	817;2259;2969;3606	63	165	0.925417	1
sp|Q8BGD9|IF4B_MOUSE	sp|Q8BGD9|IF4B_MOUSE	1	1	1	>sp|Q61753|SERA_MOUSE D-3-phosphoglycerate dehydrogenase OS=Mus musculus GN=Phgdh PE=1 SV=3	1	5	5	5	5	4	5	4	5	4	11.6	11.6	11.6	56.585	533	533	0	135.81	By MS/MS	By MS/MS	11.6	9.6	2773800	1792000	981730	1514900	1642100	17	14	31	357	115;668;755;870;2023	True;True;True;True;True	116;675;762;877;2058	743;744;745;746;747;748;749;750;751;4817;4818;4819;4820;4821;4822;4823;4824;4825;5504;5505;5506;5507;5508;5509;5510;5511;6451;6452;6453;6454;6455;6456;6457;6458;16508;16509;16510;16511	481;482;483;484;485;486;487;488;2890;2891;2892;2893;2894;2895;2896;3264;3265;3266;3267;3268;3269;3786;3787;3788;3789;3790;3791;3792;3793;9545;9546;9547	481;2891;3265;3790;9546			0.922538	1
sp|Q8BGQ7|SYAC_MOUSE	sp|Q8BGQ7|SYAC_MOUSE	3	3	3	>sp|Q9WUB3|PYGM_MOUSE Glycogen phosphorylase, muscle form OS=Mus musculus GN=Pygm PE=1 SV=3;>sp|Q8CI94|PYGB_MOUSE Glycogen phosphorylase, brain form OS=Mus musculus GN=Pygb PE=1 SV=3;>sp|Q9ET01|PYGL_MOUSE Glycogen phosphorylase, liver form OS=Mus musculus	3	2	2	2	2	2	2	2	2	2	2.3	2.3	2.3	97.285	842	842;843;850	0	12.026	By MS/MS	By MS/MS	2.3	2.3	1201600	624020	577620	654910	714870	1	2	3	590	1378;1856	True;True	1392;1890	10962;10963;10964;10965;15257;15258;15259;15260	6186;8826;8827	6186;8826			0.916125	1
sp|Q8BHN3|GANAB_MOUSE	sp|Q8BHN3|GANAB_MOUSE	2	2	2	>sp|P61804|DAD1_MOUSE Dolichyl-diphosphooligosaccharide--protein glycosyltransferase subunit DAD1 OS=Mus musculus GN=Dad1 PE=3 SV=3	1	2	2	2	2	2	2	2	2	2	19.5	19.5	19.5	12.497	113	113	0	12.014	By MS/MS	By MS/MS	19.5	19.5	386380	207070	179320	135290	148260	3	3	6	221	573;1484	True;True	580;1499	4197;4198;4199;4200;4201;4202;11749;11750;11751;11752;11753;11754;11755;11756	2531;6590;6591;6592;6593;6594	2531;6592			0.912519	1
sp|Q8BJA3|HMBX1_MOUSE	sp|Q8BJA3|HMBX1_MOUSE	1	1	1	>sp|P11276|FINC_MOUSE Fibronectin OS=Mus musculus GN=Fn1 PE=1 SV=4	1	15	15	15	13	14	13	14	13	14	8.7	8.7	8.7	272.53	2477	2477	0	107.68	By MS/MS	By MS/MS	7.6	8.1	7327600	3822200	3505500	4014400	4415000	18	21	39	98	213;282;545;689;896;919;1103;1386;1656;1704;1741;1844;1905;2074;2095	True;True;True;True;True;True;True;True;True;True;True;True;True;True;True	214;284;552;696;904;927;1112;1400;1684;1733;1771;1877;1939;2110;2133	1581;1582;1583;1584;1585;1586;1587;1588;2137;2138;2139;2140;2141;2142;2143;2144;4018;4019;4981;4982;4983;4984;4985;4986;6615;6616;6617;6618;6619;6620;6782;6783;6784;6785;9103;9104;9105;9106;9107;9108;9109;9110;11002;11003;11004;11005;13604;13605;13606;13607;13608;13609;14001;14002;14003;14004;14005;14006;14263;14264;15125;15700;15701;15702;15703;15704;15705;16924;16925;16926;16927;17159;17160	1061;1062;1063;1430;1431;1432;2440;2441;2986;2987;2988;2989;3868;3869;3870;3871;3972;3973;3974;5323;6214;6215;7878;7879;7880;7881;7882;8124;8125;8126;8127;8264;8265;8750;9125;9810;9811;9812;9813;9959	1061;1432;2440;2989;3869;3973;5323;6214;7878;8127;8265;8750;9125;9812;9959	75	1638	0.909264	1
sp|Q8BJW6|EIF2A_MOUSE	sp|Q8BJW6|EIF2A_MOUSE	1	1	1	>sp|P17751|TPIS_MOUSE Triosephosphate isomerase OS=Mus musculus GN=Tpi1 PE=1 SV=4	1	3	3	3	3	2	3	2	3	2	13.4	13.4	13.4	32.191	299	299	0	29.627	By MS/MS	By MS/MS	13.4	9	342860	220770	122090	92369	101910	4	3	7	120	1621;1715;2040	True;True;True	1649;1745;2076	13352;13353;13354;13355;13356;13357;14113;14114;16665;16666;16667	7737;7738;7739;8182;9661;9662;9663	7739;8182;9662			0.906378	1
sp|Q8BKC5|IPO5_MOUSE	sp|Q8BKC5|IPO5_MOUSE	1	1	1	>sp|Q9D0E1|HNRPM_MOUSE Heterogeneous nuclear ribonucleoprotein M OS=Mus musculus GN=Hnrnpm PE=1 SV=3	1	5	5	5	5	4	5	4	5	4	8.1	8.1	8.1	77.648	729	729	0	32.118	By MS/MS	By MS/MS	8.1	7.1	1239700	640300	599390	569990	631320	9	4	13	532	21;90;882;1298;1926	True;True;True;True;True	21;91;890;1310;1960	109;110;111;112;113;114;577;578;579;580;581;582;583;584;585;586;6514;6515;6516;6517;6518;6519;6520;10402;10403;10404;10405;10406;10407;15879	75;76;77;78;380;3831;3832;3833;5897;5898;5899;5900;9213	78;380;3831;5899;9213	341;342	591;595	0.902854	1
sp|Q8BMJ2|SYLC_MOUSE	sp|Q8BMJ2|SYLC_MOUSE	2	2	2	>sp|P19253|RL13A_MOUSE 60S ribosomal protein L13a OS=Mus musculus GN=Rpl13a PE=1 SV=4	1	2	2	2	2	2	2	2	2	2	10.8	10.8	10.8	23.464	203	203	0	13.147	By MS/MS	By MS/MS	10.8	10.8	1870900	938930	931930	898210	996320	7	3	10	125	75;2089	True;True	75;76;2125	470;471;472;473;474;475;476;477;478;479;480;481;482;483;17007;17008;17009;17010;17011;17012;17013	292;293;294;295;296;297;298;299;9843;9844	293;9843			0.901528	1
sp|Q8BMK4|CKAP4_MOUSE	sp|Q8BMK4|CKAP4_MOUSE	12	12	12	>sp|P09103|PDIA1_MOUSE Protein disulfide-isomerase OS=Mus musculus GN=P4hb PE=1 SV=2	1	4	4	4	4	3	4	3	4	3	10.6	10.6	10.6	57.058	509	509	0	43.462	By MS/MS	By MS/MS	10.6	7.5	920360	575210	345150	506720	563140	7	4	11	86	1113;1887;1981;2076	True;True;True;True	1122;1921;2015;2112	9164;9165;9166;9167;9168;9169;9170;15593;15594;15595;15596;15597;15598;15599;16233;16929;16930;16931;16932;16933;16934;16935	5341;9054;9055;9056;9057;9058;9059;9060;9061;9381;9815	5341;9061;9381;9815	66	326	0.899812	1
sp|Q8BMS1|ECHA_MOUSE	sp|Q8BMS1|ECHA_MOUSE	2	2	2	>sp|Q3TW96|UAP1L_MOUSE UDP-N-acetylhexosamine pyrophosphorylase-like protein 1 OS=Mus musculus GN=Uap1l1 PE=2 SV=1;>sp|Q91YN5|UAP1_MOUSE UDP-N-acetylhexosamine pyrophosphorylase OS=Mus musculus GN=Uap1 PE=1 SV=1	2	2	2	2	2	2	2	2	2	2	6.1	6.1	6.1	56.613	507	507;522	0	11.693	By MS/MS	By MS/MS	6.1	6.1	284740	154400	130340	158930	176900	2	2	4	317	3;1877	True;True	3;1911	18;19;20;21;22;15523;15524;15525;15526;15527;15528	16;17;9026;9027	17;9026			0.898417	1
sp|Q8BP22|F92A1_MOUSE	sp|Q8BP22|F92A1_MOUSE	1	1	1	>sp|P80314|TCPB_MOUSE T-complex protein 1 subunit beta OS=Mus musculus GN=Cct2 PE=1 SV=4	1	3	3	3	3	3	3	3	3	3	7.3	7.3	7.3	57.477	535	535	0	69.35	By MS/MS	By MS/MS	7.3	7.3	994950	459140	535810	556770	620450	6	9	15	279	260;339;631	True;True;True	261;341;638	1957;1958;1959;1960;1961;1962;1963;1964;2525;2526;2527;2528;2529;2530;2531;4602;4603;4604;4605;4606;4607;4608;4609	1319;1320;1321;1660;1661;1662;1663;1664;1665;1666;1667;1668;1669;2788;2789	1321;1669;2789	198	62	0.897365	1
sp|Q8BP47|SYNC_MOUSE	sp|Q8BP47|SYNC_MOUSE	1	1	1	>sp|O08784|TCOF_MOUSE Treacle protein OS=Mus musculus GN=Tcof1 PE=1 SV=1	1	24	24	24	20	23	20	23	20	23	22	22	22	135	1320	1320	0	251.9	By MS/MS	By MS/MS	17	22	23121000	13532000	9589400	10694000	12047000	49	41	90	43	10;27;96;244;290;291;292;293;396;470;714;1079;1140;1213;1410;1411;1570;1571;1637;1658;1680;1977;1978;2011	True;True;True;True;True;True;True;True;True;True;True;True;True;True;True;True;True;True;True;True;True;True;True;True	10;27;97;245;292;293;294;295;399;475;721;1088;1149;1223;1424;1425;1597;1598;1665;1686;1709;2011;2012;2046	52;139;140;141;142;143;144;145;146;147;148;149;150;151;152;153;154;604;605;606;607;608;609;610;611;1812;1813;1814;1815;1816;1817;1818;1819;1820;1821;1822;2196;2197;2198;2199;2200;2201;2202;2203;2204;2205;2206;2207;2208;2209;2210;2211;2212;2213;2214;2215;2216;2904;2905;2906;2907;3471;3472;5128;5129;5130;5131;5132;5133;5134;8274;8275;8276;8277;8278;8279;8280;9376;9820;9821;9822;9823;9824;9825;9826;…	46;47;94;95;96;97;388;389;390;391;392;393;394;395;396;1204;1466;1467;1468;1469;1470;1471;1889;1890;2161;3065;3066;3067;4757;4758;5456;5652;5653;5654;6311;6312;6313;7499;7500;7787;7788;7789;7790;7791;7792;7793;7794;7795;7796;7888;7889;7890;7891;7892;7893;7894;7999;8000;8001;8002;8003;8004;8005;8006;8007;8008;8009;8010;8011;8012;8013;8014;8015;8016;8017;8018;9361;9362;9363;9364;9365;9366;9367;9368;…	46;97;394;1204;1467;1468;1470;1471;1889;2161;3067;4758;5456;5652;6312;6313;7499;7500;7789;7892;8009;9371;9374;9505	43;44;45	952;953;1222	0.88769	1
sp|Q8BP67|RL24_MOUSE	sp|Q8BP67|RL24_MOUSE	2	2	2	>sp|P07356|ANXA2_MOUSE Annexin A2 OS=Mus musculus GN=Anxa2 PE=1 SV=2	1	6	6	6	6	6	6	6	6	6	20.9	20.9	20.9	38.676	339	339	0	323.31	By MS/MS	By MS/MS	20.9	20.9	6490600	3564100	2926500	2140900	2413100	23	19	42	80	353;767;1685;1723;1806;1809	True;True;True;True;True;True	355;774;1714;1753;1838;1841	2617;2618;2619;2620;2621;2622;2623;5602;5603;5604;5605;5606;5607;5608;5609;5610;5611;5612;5613;5614;5615;13874;13875;13876;13877;13878;13879;13880;13881;13882;13883;13884;13885;13886;13887;13888;13889;14161;14162;14163;14870;14871;14872;14873;14874;14875;14876;14877;14878;14879;14880;14881;14882;14896;14897;14898;14899;14900;14901;14902;14903;14904;14905;14906;14907	1719;3319;3320;3321;3322;3323;3324;3325;3326;8029;8030;8031;8032;8033;8034;8035;8036;8037;8038;8039;8040;8041;8042;8043;8044;8204;8205;8613;8614;8615;8616;8617;8618;8619;8620;8621;8622;8623;8624;8635;8636;8637;8638	1719;3323;8030;8205;8617;8637			0.887199	1
sp|Q8BS90|BORA_MOUSE	sp|Q8BS90|BORA_MOUSE	1	1	1	>sp|P47754|CAZA2_MOUSE F-actin-capping protein subunit alpha-2 OS=Mus musculus GN=Capza2 PE=1 SV=3;>sp|P47753|CAZA1_MOUSE F-actin-capping protein subunit alpha-1 OS=Mus musculus GN=Capza1 PE=1 SV=4	2	2	2	2	2	2	2	2	2	2	8.4	8.4	8.4	32.967	286	286;286	0	13.616	By MS/MS	By MS/MS	8.4	8.4	534300	305420	228880	127860	145480	3	2	5	176	59;1150	True;True	59;1159	331;332;333;334;9421;9422;9423;9424;9425;9426;9427;9428;9429;9430;9431;9432	207;208;209;210;5475	209;5475			0.878884	1
sp|Q8BTM8|FLNA_MOUSE	sp|Q8BTM8|FLNA_MOUSE	31	31	29	>sp|Q922B2|SYDC_MOUSE Aspartate--tRNA ligase, cytoplasmic OS=Mus musculus GN=Dars PE=2 SV=2	1	2	2	2	2	2	2	2	2	2	4	4	4	57.147	501	501	0	11.734	By MS/MS	By MS/MS	4	4	397740	241600	156150	216240	246820	3	1	4	489	593;934	True;True	600;942	4342;4343;4344;4345;4346;4347;6914;6915;6916;6917;6918;6919	2623;2624;4040;4041	2624;4040			0.876104	1
sp|Q8BTZ5|ANR46_MOUSE	sp|Q8BTZ5|ANR46_MOUSE	1	1	1	>sp|P26041|MOES_MOUSE Moesin OS=Mus musculus GN=Msn PE=1 SV=3	2	11	11	10	11	9	11	9	10	8	19.9	19.9	16.6	67.766	577	577;583	0	110.7	By MS/MS	By MS/MS	19.9	18.2	5441900	2723300	2718600	2965400	3386000	19	18	37	139	177;187;229;231;517;520;903;954;1120;1814;2034	True;True;True;True;True;True;True;True;True;True;True	178;188;230;232;522;525;911;962;1129;1846;1847;2069	1355;1356;1357;1358;1359;1360;1361;1362;1419;1420;1421;1422;1423;1424;1425;1426;1427;1704;1705;1706;1707;1711;1712;1713;1714;1715;1716;1717;1718;3761;3762;3763;3764;3765;3766;3767;3768;3769;3770;3771;3772;3773;3774;3775;3776;3826;3827;3828;3829;3830;3831;3832;6671;6672;6673;6674;7153;9211;14932;14933;14934;14935;14936;14937;14938;16609;16610;16611;16612;16613;16614;16615;16616;16617;16618;16619;1…	898;942;943;944;945;946;1127;1131;1132;1133;1134;1135;2306;2307;2308;2336;3903;4166;5351;8647;8648;8649;8650;8651;9618;9619;9620;9621;9622;9623;9624;9625;9626;9627;9628;9629;9630;9631;9632	898;945;1127;1135;2308;2336;3903;4166;5351;8649;9627	103;104;105	12;421;451	0.875783	1
sp|Q8BU30|SYIC_MOUSE	sp|Q8BU30|SYIC_MOUSE	5	5	5	>sp|Q7TPV4|MBB1A_MOUSE Myb-binding protein 1A OS=Mus musculus GN=Mybbp1a PE=1 SV=2	1	11	11	11	10	10	10	10	10	10	11.4	11.4	11.4	152.04	1344	1344	0	219.94	By MS/MS	By MS/MS	10.2	9.9	4823400	1976200	2847200	2618100	3001100	16	26	42	403	168;224;296;871;1186;1222;1339;1425;1622;1630;2049	True;True;True;True;True;True;True;True;True;True;True	169;225;298;878;1196;1232;1353;1440;1650;1658;2085	1271;1272;1273;1274;1275;1672;1673;1674;1675;1676;1677;1678;1679;2236;2237;2238;2239;2240;6459;6460;6461;9649;9650;9932;9933;9934;9935;9936;10621;11260;11261;11262;11263;11264;11265;11266;13358;13359;13360;13361;13362;13363;13364;13365;13366;13367;13368;13397;13398;13399;16706;16707;16708;16709	834;835;836;1110;1111;1112;1483;1484;1485;1486;1487;1488;3794;5566;5567;5568;5696;6030;6370;6371;6372;6373;6374;6375;6376;7740;7741;7742;7743;7744;7745;7746;7747;7748;7749;7771;7772;7773;7774;9687;9688;9689	835;1111;1484;3794;5566;5696;6030;6372;7745;7771;9688	265	1208	0.87238	1
sp|Q8BV57|SRCRL_MOUSE	sp|Q8BV57|SRCRL_MOUSE	1	1	1	>sp|Q62095|DDX3Y_MOUSE ATP-dependent RNA helicase DDX3Y OS=Mus musculus GN=Ddx3y PE=1 SV=2;>sp|P16381|DDX3L_MOUSE Putative ATP-dependent RNA helicase Pl10 OS=Mus musculus GN=D1Pas1 PE=2 SV=1;>sp|Q62167|DDX3X_MOUSE ATP-dependent RNA helicase DDX3X OS=Mus mu	3	3	3	3	3	3	3	3	3	3	5.5	5.5	5.5	73.427	658	658;660;662	0	18.672	By MS/MS	By MS/MS	5.5	5.5	754250	390270	363980	410960	471430	5	4	9	113	479;1924;1927	True;True;True	484;1958;1961	3523;3524;3525;3526;3527;3528;15869;15870;15871;15872;15873;15874;15880;15881;15882;15883;15884;15885;15886;15887	2197;2198;2199;9209;9210;9211;9214;9215;9216	2197;9210;9216			0.871731	1
sp|Q8BVP5|KC1G2_MOUSE	sp|Q8BVP5|KC1G2_MOUSE	1	1	1	>sp|P09405|NUCL_MOUSE Nucleolin OS=Mus musculus GN=Ncl PE=1 SV=2	1	14	14	14	14	14	14	14	14	14	19.8	19.8	19.8	76.722	707	707	0	243.8	By MS/MS	By MS/MS	19.8	19.8	23980000	11603000	12377000	12703000	14807000	33	21	54	87	178;527;557;569;655;664;930;1076;1355;1504;1505;1695;1779;1799	True;True;True;True;True;True;True;True;True;True;True;True;True;True	179;532;564;576;662;671;938;1085;1369;1522;1523;1724;1811;1831	1363;1364;1365;1366;1367;1368;1369;1370;1371;3874;3875;3876;3877;3878;3879;3880;3881;3882;3883;4107;4108;4109;4110;4111;4112;4113;4114;4179;4180;4181;4746;4747;4748;4749;4750;4751;4752;4753;4754;4755;4756;4792;4793;4794;4795;4796;4797;4798;4799;6886;6887;6888;6889;6890;6891;6892;6893;6894;6895;6896;6897;6898;6899;8247;8248;8249;8250;8251;8252;8253;8254;8255;8256;10737;10738;10739;10740;10741;1074…	899;2360;2361;2362;2363;2489;2490;2491;2519;2520;2521;2849;2850;2851;2852;2853;2854;2855;2856;2857;2858;2883;2884;4026;4027;4028;4029;4030;4031;4032;4738;4739;4740;4741;4742;4743;6086;6087;6088;6089;6770;6771;6772;6773;8067;8068;8069;8070;8071;8072;8422;8556;8557;8558	899;2362;2491;2521;2856;2883;4028;4741;6086;6772;6773;8069;8422;8557			0.857905	1
sp|Q8BVY0|RL1D1_MOUSE	sp|Q8BVY0|RL1D1_MOUSE	1	1	1	>sp|P43274|H14_MOUSE Histone H1.4 OS=Mus musculus GN=Hist1h1e PE=1 SV=2	1	30	9	9	27	30	9	9	9	9	54.3	21	21	21.977	219	219	0	323.31	By MS/MS	By MS/MS	53.9	54.3	3615000000	1793800000	1821200000	641570000	749000000	130	125	255	170	34;147;156;157;518;519;749;750;751;757;758;759;760;936;937;946;949;950;998;1017;1324;1462;1515;1516;1517;1518;1548;1549;1609;1819	False;False;False;False;False;False;False;False;False;False;False;False;False;True;False;False;False;False;False;True;True;True;True;True;True;True;False;False;False;True	34;148;157;158;523;524;756;757;758;764;765;766;767;944;945;954;957;958;1006;1025;1337;1477;1533;1534;1535;1536;1537;1538;1539;1575;1576;1637;1852	192;193;194;195;196;197;198;199;200;201;202;203;204;946;947;948;949;950;951;952;953;954;955;956;957;958;959;1058;1059;1060;1061;1062;1063;1064;1065;1066;1067;1068;1069;1070;1071;1072;1073;1074;1075;1076;1077;1078;1079;1080;1081;1082;1083;1084;1085;1086;1087;1088;1089;1090;1091;1092;1093;1094;1095;1096;1097;1098;1099;1100;1101;1102;1103;1104;1105;1106;1107;1108;1109;1110;1111;1112;1113;1114;1115;1…	133;134;135;604;605;606;655;656;657;658;659;660;661;662;663;664;665;666;667;668;669;670;671;672;673;674;675;676;677;678;679;680;681;682;683;684;685;686;687;688;689;690;691;692;693;694;695;696;697;698;699;700;701;702;703;704;705;706;707;708;709;710;711;712;713;714;715;716;717;718;719;720;721;722;723;724;725;726;727;728;729;730;731;732;733;734;735;736;737;738;739;740;741;742;743;744;745;746;747;748…	134;604;690;747;2314;2325;3219;3243;3249;3292;3296;3298;3299;4050;4056;4069;4077;4104;4419;4530;5954;6529;6812;6936;6958;6965;7353;7401;7710;8664	120	1	0.856569	1
sp|Q8BWS5|GRIN3_MOUSE	sp|Q8BWS5|GRIN3_MOUSE	1	1	1	>sp|P42932|TCPQ_MOUSE T-complex protein 1 subunit theta OS=Mus musculus GN=Cct8 PE=1 SV=3	1	5	5	5	5	5	5	5	5	5	10.4	10.4	10.4	59.555	548	548	0	35.837	By MS/MS	By MS/MS	10.4	10.4	1949100	1095800	853360	1040700	1218300	11	10	21	169	123;306;409;555;1086	True;True;True;True;True	124;308;412;562;1095	790;791;792;793;794;795;796;797;2298;2299;2300;2301;2302;2303;2304;2305;2982;2983;2984;2985;2986;4092;4093;4094;4095;4096;4097;4098;8318;8319;8320;8321;8322;8323;8324	514;515;516;517;518;519;520;521;1526;1527;1919;1920;1921;2478;2479;2480;2481;2482;2483;4778;4779	517;1526;1921;2483;4779			0.854223	1
sp|Q8BWY3|ERF1_MOUSE	sp|Q8BWY3|ERF1_MOUSE	1	1	1	>sp|P68510|1433F_MOUSE 14-3-3 protein eta OS=Mus musculus GN=Ywhah PE=1 SV=2	1	2	2	2	2	2	2	2	2	2	9.3	9.3	9.3	28.211	246	246	0	14.507	By MS/MS	By MS/MS	9.3	9.3	747840	425140	322700	214730	252330	4	1	5	270	319;642	True;True	321;649	2410;2411;2412;2413;2414;4675;4676;4677;4678;4679;4680	1587;1588;2819;2820;2821	1588;2821			0.850989	1
sp|Q8BYK6|YTHD3_MOUSE	sp|Q8BYK6|YTHD3_MOUSE	2	2	2	>sp|Q03265|ATPA_MOUSE ATP synthase subunit alpha, mitochondrial OS=Mus musculus GN=Atp5a1 PE=1 SV=1	1	7	7	7	7	6	7	6	7	6	15.9	15.9	15.9	59.752	553	553	0	163.93	By MS/MS	By MS/MS	15.9	13.7	8631700	4892000	3739700	4485900	5286100	21	13	34	305	308;864;1757;1762;1820;1974;2036	True;True;True;True;True;True;True	310;871;1788;1793;1794;1853;2008;2071	2321;2322;2323;2324;2325;2326;2327;2328;2329;2330;6393;6394;6395;6396;6397;6398;6399;6400;6401;6402;6403;6404;14391;14392;14393;14394;14395;14396;14397;14398;14399;14400;14401;14402;14403;14404;14405;14420;14421;14422;14423;14424;14425;14426;14427;14428;14973;14974;14975;14976;14977;14978;14979;14980;14981;14982;14983;14984;16175;16176;16177;16178;16179;16180;16181;16182;16183;16184;16628;16629;1…	1539;1540;3757;3758;3759;3760;3761;3762;3763;8346;8347;8348;8349;8350;8351;8352;8363;8364;8365;8366;8367;8368;8369;8693;8694;8695;8696;8697;8698;8699;8700;8701;9357;9634;9635	1540;3757;8349;8363;8696;9357;9635	213	51	0.848622	1
sp|Q8C1B7|SEP11_MOUSE	sp|Q8C1B7|SEP11_MOUSE	2	2	2	>sp|Q91VI7|RINI_MOUSE Ribonuclease inhibitor OS=Mus musculus GN=Rnh1 PE=1 SV=1	1	4	4	4	4	4	4	4	4	4	10.3	10.3	10.3	49.816	456	456	0	31.085	By MS/MS	By MS/MS	10.3	10.3	649730	467400	182330	337070	397950	9	4	13	477	259;1062;1125;1580	True;True;True;True	260;1071;1134;1608	1949;1950;1951;1952;1953;1954;1955;1956;8146;8147;8148;8149;8150;8151;9262;9263;9264;9265;9266;9267;13069;13070;13071	1310;1311;1312;1313;1314;1315;1316;1317;1318;4691;5388;7575;7576	1318;4691;5388;7576			0.847016	1
sp|Q8C4J7|TBL3_MOUSE	sp|Q8C4J7|TBL3_MOUSE	2	2	2	>sp|Q61595|KTN1_MOUSE Kinectin OS=Mus musculus GN=Ktn1 PE=2 SV=1	1	9	9	9	9	8	9	8	9	8	7.6	7.6	7.6	152.59	1327	1327	0	85.15	By MS/MS	By MS/MS	7.6	6.8	4143600	2092600	2051000	2183200	2578900	20	13	33	351	45;357;510;823;1024;1134;1229;1341;1711	True;True;True;True;True;True;True;True;True	45;359;515;830;1032;1143;1239;1355;1740	269;270;271;272;273;274;2652;2653;2654;2655;2656;2657;2658;2659;3668;3669;3670;3671;3672;3673;6053;7819;7820;7821;7822;7823;7824;7825;7826;7827;7828;9311;9312;9313;9970;9971;9972;9973;9974;9975;10624;10625;10626;10627;10628;10629;10630;10631;14081;14082;14083;14084;14085	171;172;173;174;175;1745;1746;1747;1748;1749;1750;1751;1752;1753;1754;1755;2274;3564;4564;4565;5423;5424;5709;6034;6035;6036;6037;6038;8161;8162;8163;8164;8165	174;1754;2274;3564;4565;5424;5709;6034;8165			0.846562	1
sp|Q8C7X2|EMC1_MOUSE	sp|Q8C7X2|EMC1_MOUSE	1	1	1	>sp|P62889|RL30_MOUSE 60S ribosomal protein L30 OS=Mus musculus GN=Rpl30 PE=3 SV=2	1	3	3	3	3	3	3	3	3	3	31.3	31.3	31.3	12.784	115	115	0	20.162	By MS/MS	By MS/MS	31.3	31.3	1522000	830580	691380	487370	581050	6	6	12	250	1246;1587;1884	True;True;True	1257;1615;1918	10060;10061;10062;10063;10064;10065;10066;10067;10068;10069;13134;13135;13136;13137;13138;13139;15576;15577;15578;15579;15580;15581;15582	5753;5754;5755;5756;5757;5758;5759;5760;7624;7625;9045;9046	5757;7624;9045			0.838775	1
sp|Q8CCK0|H2AW_MOUSE	sp|Q8CCK0|H2AW_MOUSE	1	1	1	>sp|Q60847|COCA1_MOUSE Collagen alpha-1(XII) chain OS=Mus musculus GN=Col12a1 PE=2 SV=3	1	5	5	5	2	5	2	5	2	5	1.9	1.9	1.9	340.21	3120	3120	0	32.27	By matching	By MS/MS	0.9	1.9	145070	50216	94858	76444	91388	0	5	5	337	137;162;700;712;1367	True;True;True;True;True	138;163;707;719;1381	877;1247;1248;1249;5049;5117;5118;5119;10831	560;815;3027;3060;6143	560;815;3027;3060;6143	230	419	0.836477	1
sp|Q8CCS6|PABP2_MOUSE	sp|Q8CCS6|PABP2_MOUSE	1	1	1	>sp|Q8VEK3|HNRPU_MOUSE Heterogeneous nuclear ribonucleoprotein U OS=Mus musculus GN=Hnrnpu PE=1 SV=1	1	6	6	6	5	6	5	6	5	6	10.6	10.6	10.6	87.917	800	800	0	37.842	By MS/MS	By MS/MS	8.8	10.6	2762100	1450700	1311400	1406500	1683500	11	8	19	468	943;958;1359;1652;1660;2084	True;True;True;True;True;True	951;966;1373;1680;1688;2120	6972;6973;6974;6975;6976;6977;7284;7285;10769;10770;10771;10772;10773;10774;10775;10776;10777;10778;10779;10780;10781;13562;13563;13564;13565;13566;13567;13568;13569;13634;13635;13636;13637;13638;13639;13640;13641;16980;16981;16982	4066;4290;6110;6111;6112;6113;6114;6115;6116;6117;6118;6119;6120;7863;7899;7900;9830;9831;9832	4066;4290;6115;7863;7900;9831	313	510	0.835462	1
sp|Q8CG47|SMC4_MOUSE	sp|Q8CG47|SMC4_MOUSE	1	1	1	>sp|P14148|RL7_MOUSE 60S ribosomal protein L7 OS=Mus musculus GN=Rpl7 PE=1 SV=2	1	2	2	2	2	2	2	2	2	2	11.1	11.1	11.1	31.419	270	270	0	180.12	By MS/MS	By MS/MS	11.1	11.1	1828600	966300	862280	799170	960750	4	3	7	107	806;1830	True;True	813;1863	5906;5907;5908;5909;5910;5911;5912;5913;5914;5915;5916;5917;5918;5919;5920;5921;15034;15035;15036;15037;15038;15039	3479;3480;3481;3482;3483;8713;8714	3482;8714			0.831819	1
sp|Q8CG48|SMC2_MOUSE	sp|Q8CG48|SMC2_MOUSE	2	2	2	>sp|Q9DCL9|PUR6_MOUSE Multifunctional protein ADE2 OS=Mus musculus GN=Paics PE=1 SV=4	1	2	2	2	2	2	2	2	2	2	5.2	5.2	5.2	47.006	425	425	0	11.807	By MS/MS	By MS/MS	5.2	5.2	301550	146650	154910	159820	192570	3	2	5	554	44;278	True;True	44;280	263;264;265;266;267;268;2095;2096;2097;2098;2099;2100;2101;2102	170;1381;1382;1383;1384	170;1382			0.829932	1
sp|Q8CGC7|SYEP_MOUSE	sp|Q8CGC7|SYEP_MOUSE	8	8	8	>sp|Q8CGC7|SYEP_MOUSE Bifunctional glutamate/proline--tRNA ligase OS=Mus musculus GN=Eprs PE=1 SV=4	1	8	8	8	6	6	6	6	6	6	7	7	7	170.08	1512	1512	0	56.941	By MS/MS	By MS/MS	5.6	5.2	6420400	341300	6079100	1180500	1464900	9	7	16	448	334;393;739;1170;1636;1659;2017;2045	True;True;True;True;True;True;True;True	336;396;746;1180;1664;1687;2052;2081	2494;2890;2891;2892;5319;5320;5321;5322;9550;9551;9552;9553;13428;13429;13430;13431;13432;13630;13631;13632;13633;16452;16683	1644;1880;1881;3159;3160;3161;3162;5519;7784;7785;7786;7895;7896;7897;7898;9520;9677	1644;1881;3159;5519;7785;7895;9520;9677	285;286	299;1474	0.805857	1
sp|Q8CGD2|CRLD1_MOUSE	sp|Q8CGD2|CRLD1_MOUSE	1	1	1	>sp|P14733|LMNB1_MOUSE Lamin-B1 OS=Mus musculus GN=Lmnb1 PE=1 SV=3	1	4	4	4	4	3	4	3	4	3	7.5	7.5	7.5	66.785	588	588	0	26.253	By MS/MS	By MS/MS	7.5	5.8	2081100	1089300	991770	1013100	1263000	10	8	18	109	242;276;338;1409	True;True;True;True	243;278;340;1423	1802;1803;1804;1805;1806;1807;1808;1809;1810;2081;2082;2083;2084;2085;2086;2087;2088;2089;2090;2091;2092;2093;2516;2517;2518;2519;2520;2521;2522;2523;2524;11158;11159;11160;11161;11162	1199;1200;1201;1202;1374;1375;1376;1377;1378;1379;1655;1656;1657;1658;1659;6308;6309;6310	1201;1377;1656;6310			0.802138	1
sp|Q8CI51|PDLI5_MOUSE	sp|Q8CI51|PDLI5_MOUSE	1	1	1	>sp|P11983|TCPA_MOUSE T-complex protein 1 subunit alpha OS=Mus musculus GN=Tcp1 PE=1 SV=3	1	5	5	5	5	5	5	5	5	5	10.1	10.1	10.1	60.448	556	556	0	31.501	By MS/MS	By MS/MS	10.1	10.1	1038400	516310	522060	544420	679770	7	3	10	101	801;810;1288;1642;2088	True;True;True;True;True	808;817;1300;1670;2124	5867;5868;5869;5870;5871;5872;5963;5964;5965;5966;5967;10336;10337;10338;10339;10340;13485;13486;13487;13488;13489;13490;17000;17001;17002;17003;17004;17005;17006	3470;3508;5866;5867;7814;7815;7816;9840;9841;9842	3470;3508;5866;7814;9841	78;79	1;23	0.800889	1
sp|Q8CIE6|COPA_MOUSE	sp|Q8CIE6|COPA_MOUSE	2	2	2	>sp|P83882|RL36A_MOUSE 60S ribosomal protein L36a OS=Mus musculus GN=Rpl36a PE=1 SV=2	1	4	4	4	4	4	4	4	4	4	23.6	23.6	23.6	12.441	106	106	0	24.23	By MS/MS	By MS/MS	23.6	23.6	1243500	779990	463520	283160	353950	2	2	4	284	399;688;925;975	True;True;True;True	402;695;933;983	2912;2913;2914;2915;4977;4978;4979;4980;6827;6828;6829;6830;7361;7362;7363;7364	1894;2985;3992;4323	1894;2985;3992;4323			0.8	1
sp|Q8CJ27|ASPM_MOUSE	sp|Q8CJ27|ASPM_MOUSE	2	2	2	>sp|Q04750|TOP1_MOUSE DNA topoisomerase 1 OS=Mus musculus GN=Top1 PE=1 SV=2	1	6	6	6	6	6	6	6	6	6	10.8	10.8	10.8	90.875	767	767	0	42.902	By MS/MS	By MS/MS	10.8	10.8	2091400	1011400	1080000	976190	1227000	8	10	18	307	72;110;505;1197;1537;1854	True;True;True;True;True;True	72;111;510;1207;1564;1888	451;452;453;454;455;456;457;458;714;715;716;717;3652;3653;3654;3655;9705;9706;9707;9708;9709;9710;9711;12623;12624;12625;12626;12627;12628;12629;15252;15253;15254;15255	289;468;469;470;2263;2264;2265;2266;5600;7309;7310;7311;7312;7313;8821;8822;8823;8824	289;468;2263;5600;7309;8822			0.795591	1
sp|Q8JZQ9|EIF3B_MOUSE	sp|Q8JZQ9|EIF3B_MOUSE	4	4	4	>sp|Q91YQ5|RPN1_MOUSE Dolichyl-diphosphooligosaccharide--protein glycosyltransferase subunit 1 OS=Mus musculus GN=Rpn1 PE=1 SV=1	1	4	4	4	4	4	4	4	4	4	8.9	8.9	8.9	68.527	608	608	0	28.151	By MS/MS	By MS/MS	8.9	8.9	2606100	1005900	1600300	1363800	1721200	10	10	20	483	268;323;1836;2024	True;True;True;True	270;325;1869;2059	2030;2031;2032;2033;2034;2035;2427;2428;2429;2430;2431;2432;2433;2434;2435;15084;15085;15086;15087;15088;15089;15090;15091;16512;16513;16514;16515;16516;16517	1355;1356;1357;1598;1599;1600;1601;1602;1603;1604;1605;1606;1607;8736;9548;9549;9550;9551;9552;9553;9554	1356;1603;8736;9550			0.792354	1
sp|Q8K1N4|SPAS2_MOUSE	sp|Q8K1N4|SPAS2_MOUSE	1	1	1	>sp|P19324|SERPH_MOUSE Serpin H1 OS=Mus musculus GN=Serpinh1 PE=1 SV=3	1	3	3	3	3	3	3	3	3	3	8.6	8.6	8.6	46.533	417	417	0	20.086	By MS/MS	By MS/MS	8.6	8.6	1791500	914710	876780	930120	1175600	6	10	16	126	391;783;1002	True;True;True	394;790;1010	2866;2867;2868;2869;2870;2871;2872;2873;2874;5715;5716;5717;5718;5719;5720;5721;5722;7590;7591;7592;7593;7594;7595	1871;1872;1873;1874;1875;1876;1877;1878;3389;3390;3391;3392;3393;3394;3395;4442	1873;3394;4442			0.791187	1
sp|Q8K1S3|UNC5B_MOUSE	sp|Q8K1S3|UNC5B_MOUSE	1	1	1	>sp|P62281|RS11_MOUSE 40S ribosomal protein S11 OS=Mus musculus GN=Rps11 PE=1 SV=3	1	4	4	4	4	3	4	3	4	3	17.7	17.7	17.7	18.431	158	158	0	25.828	By MS/MS	By MS/MS	17.7	17.7	1539300	1012800	526570	407300	520670	4	1	5	233	55;433;434;1965	True;True;True;True	55;437;438;1999	319;320;321;322;323;3176;3177;3178;3179;3180;16116;16117;16118;16119;16120;16121;16122;16123;16124;16125	200;201;2028;2029;9336	201;2028;2029;9336			0.782261	1
sp|Q8K2B3|SDHA_MOUSE	sp|Q8K2B3|SDHA_MOUSE	1	1	1	>sp|P17742|PPIA_MOUSE Peptidyl-prolyl cis-trans isomerase A OS=Mus musculus GN=Ppia PE=1 SV=2	1	3	3	3	3	3	3	3	3	3	20.1	20.1	20.1	17.971	164	164	0	19.38	By MS/MS	By MS/MS	20.1	20.1	10457000	5451600	5004900	2932600	3757200	8	8	16	119	451;981;2018	True;True;True	455;989;2053	3289;3290;3291;3292;3293;7400;7401;7402;7403;7404;7405;7406;7407;7408;7409;7410;7411;7412;7413;16453;16454;16455;16456;16457;16458;16459;16460;16461;16462;16463;16464;16465;16466;16467;16468;16469;16470;16471;16472;16473;16474;16475;16476	2078;2079;2080;4344;4345;4346;4347;4348;4349;4350;4351;4352;9521;9522;9523;9524	2080;4350;9522	89;90	136;142	0.780528	1
sp|Q8QZY1|EIF3L_MOUSE	sp|Q8QZY1|EIF3L_MOUSE	1	1	1	>sp|Q6ZWN5|RS9_MOUSE 40S ribosomal protein S9 OS=Mus musculus GN=Rps9 PE=1 SV=3	1	2	2	2	2	2	2	2	2	2	9.8	9.8	9.8	22.591	194	194	0	12.457	By MS/MS	By MS/MS	9.8	9.8	1751900	981940	769920	759840	982200	5	3	8	392	1081;1631	True;True	1090;1659	8286;8287;8288;8289;8290;8291;8292;8293;8294;8295;8296;8297;8298;8299;13400;13401;13402;13403;13404;13405;13406	4762;4763;4764;4765;4766;4767;4768;7775	4765;7775			0.77361	1
sp|Q8R1B4|EIF3C_MOUSE	sp|Q8R1B4|EIF3C_MOUSE	2	2	2	>sp|Q9QZQ8|H2AY_MOUSE Core histone macro-H2A.1 OS=Mus musculus GN=H2afy PE=1 SV=3	1	4	4	4	4	3	4	3	4	3	18.3	18.3	18.3	39.735	372	372	0	24.104	By MS/MS	By MS/MS	18.3	14.2	854040	408870	445160	433340	564740	4	9	13	583	32;138;778;1553	True;True;True;True	32;139;785;1580	184;185;186;187;188;189;878;879;5688;5689;5690;5691;5692;12801;12802;12803;12804;12805;12806	123;124;125;126;127;128;129;130;131;561;562;3374;3375;7415	125;561;3374;7415	370	342	0.767327	1
sp|Q8VDD5|MYH9_MOUSE	sp|Q8VDD5|MYH9_MOUSE	51	51	46	>sp|Q9CR57|RL14_MOUSE 60S ribosomal protein L14 OS=Mus musculus GN=Rpl14 PE=1 SV=3	1	3	3	3	3	3	3	3	3	3	15.7	15.7	15.7	23.564	217	217	0	26.726	By MS/MS	By MS/MS	15.7	15.7	8633600	3886100	4747500	3731500	4885100	9	17	26	516	23;199;1243	True;True;True	23;200;1254	120;121;122;123;124;125;126;127;128;129;130;131;1477;1478;1479;1480;1481;1482;1483;1484;1485;1486;1487;10035;10036;10037;10038;10039;10040;10041;10042;10043;10044;10045;10046;10047;10048;10049	80;81;82;83;84;85;86;87;88;89;983;984;5734;5735;5736;5737;5738;5739;5740;5741;5742;5743;5744;5745;5746;5747	81;983;5739			0.763853	1
sp|Q8VDJ3|VIGLN_MOUSE	sp|Q8VDJ3|VIGLN_MOUSE	20	20	20	>sp|P40124|CAP1_MOUSE Adenylyl cyclase-associated protein 1 OS=Mus musculus GN=Cap1 PE=1 SV=4	1	3	3	3	3	3	3	3	3	3	7.6	7.6	7.6	51.564	474	474	0	44.673	By MS/MS	By MS/MS	7.6	7.6	364840	252520	112320	171380	231150	6	2	8	162	62;185;1405	True;True;True	62;186;1419	352;353;354;355;1402;1403;1404;1405;1406;11117;11118;11119;11120;11121	220;221;925;926;927;928;929;6287	220;927;6287	114	4	0.741423	1
sp|Q8VE37|RCC1_MOUSE	sp|Q8VE37|RCC1_MOUSE	1	1	1	>sp|P31230|AIMP1_MOUSE Aminoacyl tRNA synthase complex-interacting multifunctional protein 1 OS=Mus musculus GN=Aimp1 PE=1 SV=2	1	2	2	2	2	2	2	2	2	2	9.7	9.7	9.7	33.997	310	310	0	12.087	By MS/MS	By MS/MS	9.7	9.7	256290	97747	158540	130750	179920	3	1	4	148	617;1850	True;True	624;1884	4542;4543;4544;4545;4546;4547;15232;15233;15234;15235;15236	2749;2750;2751;8804	2750;8804	108	200	0.726712	1
sp|Q8VEJ4|NLE1_MOUSE	sp|Q8VEJ4|NLE1_MOUSE	1	1	1	>sp|P56480|ATPB_MOUSE ATP synthase subunit beta, mitochondrial OS=Mus musculus GN=Atp5b PE=1 SV=2	1	9	9	9	9	8	9	8	9	8	25.9	25.9	25.9	56.3	529	529	0	67.329	By MS/MS	By MS/MS	25.9	22.9	3584800	1769900	1815000	1685700	2339300	15	12	27	202	57;122;603;836;878;881;884;1247;1863	True;True;True;True;True;True;True;True;True	57;123;610;843;885;889;892;1258;1897	326;327;328;329;784;785;786;787;788;789;4417;4418;4419;4420;4421;4422;4423;4424;4425;4426;6136;6137;6138;6139;6140;6141;6142;6143;6144;6145;6146;6147;6148;6149;6488;6489;6490;6491;6492;6510;6511;6512;6513;6533;6534;6535;6536;10070;10071;10072;10073;10074;10075;10076;10077;10078;10079;15305;15306;15307	204;205;510;511;512;513;2670;2671;2672;2673;2674;2675;2676;2677;3621;3817;3818;3819;3827;3828;3829;3830;3842;3843;5761;5762;8853	204;512;2674;3621;3818;3827;3843;5761;8853	137;138;139;140;141	145;272;339;342;408	0.7206	1
sp|Q8VEK3|HNRPU_MOUSE	sp|Q8VEK3|HNRPU_MOUSE	6	6	6	>sp|P70168|IMB1_MOUSE Importin subunit beta-1 OS=Mus musculus GN=Kpnb1 PE=1 SV=2	1	4	4	4	3	4	3	4	3	4	5.1	5.1	5.1	97.183	876	876	0	29.753	By MS/MS	By MS/MS	4.1	5.1	999780	455170	544610	422180	586980	2	6	8	271	1037;1289;1857;1947	True;True;True;True	1045;1301;1891;1981	7939;7940;10341;10342;10343;10344;10345;10346;10347;15261;15262;15263;15264;15265;15266;15267;15268;15269;15270;15271;15978;15979;15980;15981;15982;15983;15984	4600;4601;5868;5869;5870;8828;8829;8830;9261	4601;5870;8829;9261	196	1	0.719241	1
sp|Q8VEM8|MPCP_MOUSE	sp|Q8VEM8|MPCP_MOUSE	1	1	1	>sp|Q9D0T1|NH2L1_MOUSE NHP2-like protein 1 OS=Mus musculus GN=Nhp2l1 PE=1 SV=4	1	2	2	2	2	2	2	2	2	2	15.6	15.6	15.6	14.173	128	128	0	14.344	By MS/MS	By MS/MS	15.6	15.6	377000	228520	148480	82884	115290	4	4	8	537	1130;1733	True;True	1139;1763	9290;9291;9292;9293;14213;14214;14215;14216;14217	5409;5410;5411;5412;8237;8238;8239;8240	5409;8240			0.718918	1
sp|Q8VHE0|SEC63_MOUSE	sp|Q8VHE0|SEC63_MOUSE	3	3	3	>sp|O88342|WDR1_MOUSE WD repeat-containing protein 1 OS=Mus musculus GN=Wdr1 PE=1 SV=3	1	2	2	2	2	2	2	2	2	2	3.1	3.1	3.1	66.406	606	606	0	25.271	By MS/MS	By MS/MS	3.1	3.1	928160	464400	463760	432800	606650	4	2	6	67	423;1907	True;True	427;1941	3110;3111;3112;3113;3114;3115;3116;3117;3118;3119;3120;15719;15720;15721;15722;15723;15724;15725;15726;15727	1999;9129;9130;9131;9132;9133	1999;9132			0.713426	1
sp|Q8VHX2|EDAD_MOUSE	sp|Q8VHX2|EDAD_MOUSE	1	1	1	>sp|O70251|EF1B_MOUSE Elongation factor 1-beta OS=Mus musculus GN=Eef1b PE=1 SV=5	1	3	3	3	3	2	3	2	3	2	15.6	15.6	15.6	24.693	225	225	0	21.099	By MS/MS	By MS/MS	15.6	12.4	1124500	690210	434320	252730	356440	6	2	8	61	1053;1559;1807	True;True;True	1061;1586;1839	8063;12829;12830;12831;12832;12833;12834;12835;12836;12837;12838;14883;14884;14885;14886	4670;7434;7435;7436;7437;7438;8625;8626;8627	4670;7438;8627			0.709039	1
sp|Q8VHX6|FLNC_MOUSE	sp|Q8VHX6|FLNC_MOUSE	15	11	11	>sp|P35980|RL18_MOUSE 60S ribosomal protein L18 OS=Mus musculus GN=Rpl18 PE=2 SV=3	1	3	3	3	3	3	3	3	3	3	21.3	21.3	21.3	21.644	188	188	0	90.853	By MS/MS	By MS/MS	21.3	21.3	1919100	789960	1129200	878020	1247400	7	5	12	158	211;874;1718	True;True;True	212;881;1748	1570;1571;1572;6468;6469;6470;6471;14133;14134;14135;14136;14137;14138;14139;14140;14141;14142	1054;3799;3800;3801;3802;8189;8190;8191;8192;8193;8194;8195	1054;3801;8190			0.70388	1
sp|Q8VIJ6|SFPQ_MOUSE	sp|Q8VIJ6|SFPQ_MOUSE	1	1	1	>sp|P15864|H12_MOUSE Histone H1.2 OS=Mus musculus GN=Hist1h1c PE=1 SV=2	2	28	13	13	26	27	11	12	11	12	56.6	27.4	27.4	21.266	212	212;208	0	323.31	By MS/MS	By MS/MS	53.8	56.6	1932100000	623490000	1308600000	311260000	444240000	103	99	202	111	35;148;149;156;157;248;518;519;684;749;750;751;938;947;949;950;955;956;999;1000;1427;1459;1501;1502;1503;1548;1549;1608	True;True;True;False;False;False;False;False;True;False;False;False;True;True;False;False;False;False;True;True;True;False;True;True;True;False;False;True	35;149;150;157;158;249;523;524;691;756;757;758;946;955;957;958;963;964;1007;1008;1442;1474;1516;1517;1518;1519;1520;1521;1575;1576;1636	205;206;207;208;209;210;211;212;213;960;961;962;963;964;965;966;967;968;969;970;971;972;973;974;975;976;977;978;979;980;981;982;983;984;985;986;987;988;989;990;991;992;993;994;995;996;997;998;999;1000;1001;1002;1003;1004;1005;1006;1007;1008;1009;1010;1011;1012;1013;1014;1015;1016;1017;1018;1019;1020;1058;1059;1060;1061;1062;1063;1064;1065;1066;1067;1068;1069;1070;1071;1072;1073;1074;1075;1076;107…	136;137;138;139;607;608;609;610;611;612;613;614;615;616;617;618;619;620;621;622;623;624;625;626;627;628;629;630;631;632;633;634;635;636;637;638;639;640;641;642;655;656;657;658;659;660;661;662;663;664;665;666;667;668;669;670;671;672;673;674;675;676;677;678;679;680;681;682;683;684;685;686;687;688;689;690;691;692;693;694;695;696;697;698;699;700;701;702;703;704;705;706;707;708;709;710;711;712;713;714…	137;614;635;690;747;1220;2314;2325;2979;3219;3243;3249;4058;4071;4077;4104;4229;4243;4428;4440;6378;6472;6635;6745;6754;7353;7401;7706			0.700657	1
sp|Q91V92|ACLY_MOUSE	sp|Q91V92|ACLY_MOUSE	2	2	2	>sp|Q9R0P5|DEST_MOUSE Destrin OS=Mus musculus GN=Dstn PE=1 SV=3	1	2	2	2	2	2	2	2	2	2	13.9	13.9	13.9	18.521	165	165	0	14.828	By MS/MS	By MS/MS	13.9	13.9	1651800	812150	839650	472880	675850	3	5	8	584	252;2052	True;True	253;2088	1885;1886;1887;1888;1889;1890;1891;1892;1893;1894;1895;1896;16727;16728;16729;16730;16731;16732;16733;16734;16735	1280;1281;1282;1283;1284;1285;1286;9700	1282;9700			0.699682	1
sp|Q91VC3|IF4A3_MOUSE	sp|Q91VC3|IF4A3_MOUSE	1	1	1	>sp|P11087|CO1A1_MOUSE Collagen alpha-1(I) chain OS=Mus musculus GN=Col1a1 PE=1 SV=4	1	5	5	5	5	4	5	4	5	4	4.4	4.4	4.4	138.03	1453	1453	0	86.533	By MS/MS	By MS/MS	4.4	3.6	2544700	1217600	1327100	1191700	1733000	7	6	13	97	395;708;775;1361;1599	True;True;True;True;True	398;715;782;1375;1627	2900;2901;2902;2903;5093;5094;5095;5096;5097;5098;5660;10788;10789;10790;10791;13210;13211;13212;13213;13214;13215;13216	1886;1887;1888;3052;3053;3362;6123;6124;7679;7680;7681;7682;7683	1888;3052;3362;6123;7682			0.687651	1
sp|Q91VE6|MK67I_MOUSE	sp|Q91VE6|MK67I_MOUSE	1	1	1	>sp|P62754|RS6_MOUSE 40S ribosomal protein S6 OS=Mus musculus GN=Rps6 PE=1 SV=1	1	5	5	5	5	4	5	4	5	4	24.5	24.5	24.5	28.68	249	249	0	37.131	By MS/MS	By MS/MS	24.5	19.7	4054900	2416000	1638800	1452600	2122600	6	5	11	240	973;1110;1168;1273;1370	True;True;True;True;True	981;1119;1178;1284;1384	7348;7349;7350;7351;7352;7353;9139;9140;9141;9142;9143;9144;9145;9146;9147;9148;9149;9150;9545;9546;9547;9548;10260;10261;10262;10263;10264;10265;10266;10267;10268;10269;10270;10271;10272;10273;10274;10846;10847;10848;10849;10850;10851;10852;10853;10854;10855;10856	4320;4321;5336;5517;5828;5829;6146;6147;6148;6149;6150;6151	4320;5336;5517;5828;6150	168	32	0.684349	1
sp|Q91VI7|RINI_MOUSE	sp|Q91VI7|RINI_MOUSE	4	4	4	>sp|Q9CZM2|RL15_MOUSE 60S ribosomal protein L15 OS=Mus musculus GN=Rpl15 PE=2 SV=4	1	2	2	2	2	2	2	2	2	2	7.8	7.8	7.8	24.146	204	204	0	12.65	By MS/MS	By MS/MS	7.8	7.8	2900000	1390500	1509500	1125300	1659200	4	2	6	529	1419;1598	True;True	1434;1626	11222;11223;11224;11225;11226;11227;11228;11229;13206;13207;13208;13209	6352;6353;7675;7676;7677;7678	6353;7676			0.678218	1
sp|Q91VL8|TE2IP_MOUSE	sp|Q91VL8|TE2IP_MOUSE	3	3	3	>sp|P63038|CH60_MOUSE 60 kDa heat shock protein, mitochondrial OS=Mus musculus GN=Hspd1 PE=1 SV=1	1	8	8	8	7	7	7	7	7	7	18.3	18.3	18.3	60.955	573	573	0	49.451	By MS/MS	By MS/MS	15.4	16.8	4132300	2243700	1888500	1833300	2722300	14	14	28	258	38;786;1209;1250;1344;1840;1923;2026	True;True;True;True;True;True;True;True	38;793;1219;1261;1358;1873;1957;2061	218;219;5746;5747;5748;5749;5750;5751;5752;5753;5754;5755;5756;5757;5758;5759;5760;9791;9792;9793;10100;10101;10102;10103;10104;10105;10106;10107;10646;10647;10648;10649;10650;10651;10652;10653;15105;15106;15107;15108;15109;15110;15861;15862;15863;15864;15865;15866;15867;15868;16525;16526;16527;16528;16529;16530;16531;16532	143;144;3415;5633;5771;5772;5773;5774;5775;5776;6043;6044;6045;6046;6047;6048;6049;6050;8742;9204;9205;9206;9207;9208;9565;9566;9567;9568	144;3415;5633;5776;6046;8742;9207;9565			0.673438	1
sp|Q91VM5|RMXL1_MOUSE;sp|Q9WV02|RBMX_MOUSE	sp|Q91VM5|RMXL1_MOUSE;sp|Q9WV02|RBMX_MOUSE	1;1	1;1	1;1	>sp|P23116|EIF3A_MOUSE Eukaryotic translation initiation factor 3 subunit A OS=Mus musculus GN=Eif3a PE=1 SV=5	1	3	3	3	3	2	3	2	3	2	2.7	2.7	2.7	161.93	1344	1344	0	16.694	By MS/MS	By MS/MS	2.7	1.7	328790	169480	159310	147420	234220	3	2	5	130	1365;1795;1964	True;True;True	1379;1827;1998	10825;10826;10827;10828;14719;14720;16112;16113;16114;16115	6139;6140;6141;8542;9335	6140;8542;9335			0.629408	1
sp|Q91VR5|DDX1_MOUSE	sp|Q91VR5|DDX1_MOUSE	2	2	2	>sp|Q9D6Z1|NOP56_MOUSE Nucleolar protein 56 OS=Mus musculus GN=Nop56 PE=1 SV=2	1	8	8	8	7	8	7	8	7	8	19.1	19.1	19.1	64.464	580	580	0	57.165	By MS/MS	By MS/MS	15	19.1	2906100	1152100	1754000	1309600	2081700	7	23	30	541	439;594;812;927;1035;1148;1212;2086	True;True;True;True;True;True;True;True	443;601;819;935;1043;1157;1222;2122	3204;3205;3206;3207;3208;3209;3210;3211;3212;3213;3214;4348;4349;4350;4351;4352;4353;4354;4355;4356;5971;5972;5973;5974;5975;5976;5977;6838;6839;6840;6841;6842;6843;6844;6845;7929;9407;9408;9409;9410;9411;9412;9413;9814;9815;9816;9817;9818;9819;16989;16990;16991;16992;16993;16994;16995;16996;16997;16998	2039;2040;2041;2042;2043;2044;2625;2626;2627;2628;2629;2630;2631;2632;2633;3511;3998;3999;4590;4591;5468;5469;5470;5650;5651;9834;9835;9836;9837;9838	2043;2631;3511;3998;4590;5468;5650;9836			0.629101	1
sp|Q91W90|TXND5_MOUSE	sp|Q91W90|TXND5_MOUSE	1	1	1	>sp|Q6DFW4|NOP58_MOUSE Nucleolar protein 58 OS=Mus musculus GN=Nop58 PE=1 SV=1	1	6	6	6	6	6	6	6	6	6	14.9	14.9	14.9	60.342	536	536	0	37.816	By MS/MS	By MS/MS	14.9	14.9	1707400	696750	1010600	735080	1198300	12	14	26	381	790;1105;1640;1815;1852;2064	True;True;True;True;True;True	797;1114;1668;1848;1886;2100	5788;5789;5790;5791;5792;5793;5794;9113;9114;9115;9116;9117;9118;9119;13475;13476;13477;13478;14939;14940;14941;14942;14943;14944;14945;14946;15240;15241;15242;15243;15244;15245;15246;15247;15248;16858;16859;16860;16861;16862;16863;16864;16865	3436;3437;5325;5326;5327;7810;7811;7812;8652;8653;8654;8655;8656;8657;8806;8807;8808;8809;8810;8811;8812;8813;8814;8815;8816;8817;9782	3436;5326;7812;8655;8817;9782	252	123	0.613436	1
sp|Q91WM3|U3IP2_MOUSE	sp|Q91WM3|U3IP2_MOUSE	1	1	1	>sp|Q01149|CO1A2_MOUSE Collagen alpha-2(I) chain OS=Mus musculus GN=Col1a2 PE=2 SV=2	1	3	3	3	2	3	2	3	2	3	3.2	3.2	3.2	129.56	1372	1372	0	19.481	By MS/MS	By MS/MS	2	3.2	446360	182600	263770	196040	320140	4	4	8	296	1403;1545;1597	True;True;True	1417;1572;1625	11090;11091;11092;11093;12700;12701;12702;12703;13205	6269;6270;6271;6272;6273;6274;7346;7674	6274;7346;7674			0.612357	1
sp|Q91YQ5|RPN1_MOUSE	sp|Q91YQ5|RPN1_MOUSE	4	4	4	>sp|P80317|TCPZ_MOUSE T-complex protein 1 subunit zeta OS=Mus musculus GN=Cct6a PE=1 SV=3	1	2	2	2	2	2	2	2	2	2	5.5	5.5	5.5	58.004	531	531	0	12.58	By MS/MS	By MS/MS	5.5	5.5	449800	170490	279310	203810	339510	1	3	4	282	220;1948	True;True	221;1982	1645;1646;1647;1648;1649;1650;1651;1652;15985;15986;15987;15988;15989	1103;9262;9263;9264	1103;9263			0.600306	1
sp|Q91YT7|YTHD2_MOUSE	sp|Q91YT7|YTHD2_MOUSE	1	1	1	>sp|P10922|H10_MOUSE Histone H1.0 OS=Mus musculus GN=H1f0 PE=2 SV=4	1	20	20	20	15	19	15	19	15	19	52.6	52.6	52.6	20.861	194	194	0	323.31	By MS/MS	By MS/MS	43.8	48.5	1376900000	718400000	658460000	203200000	347420000	144	118	262	96	770;984;1045;1257;1258;1330;1331;1332;1464;1465;1551;1667;1747;1748;1919;1920;1921;1945;2092;2093	True;True;True;True;True;True;True;True;True;True;True;True;True;True;True;True;True;True;True;True	777;992;1053;1268;1269;1343;1344;1345;1346;1479;1480;1578;1695;1777;1778;1779;1953;1954;1955;1979;2128;2129;2130;2131	5620;5621;5622;5623;5624;5625;5626;5627;5628;5629;5630;5631;5632;5633;5634;5635;7428;7429;7999;8000;8001;8002;8003;8004;8005;8006;8007;8008;8009;8010;8011;8012;10161;10162;10163;10164;10165;10166;10167;10168;10169;10170;10171;10172;10173;10174;10175;10176;10177;10178;10179;10180;10181;10182;10183;10184;10185;10186;10187;10188;10189;10547;10548;10549;10550;10551;10552;10553;10554;10555;10556;10557…	3330;3331;3332;3333;3334;3335;3336;3337;3338;3339;3340;3341;3342;3343;3344;3345;3346;3347;3348;3349;4356;4357;4636;4637;4638;4639;5797;5798;5799;5800;5801;5802;5803;5978;5979;5980;5981;5982;5983;5984;5985;5986;5987;5988;5989;5990;5991;5992;5993;5994;5995;5996;5997;5998;5999;6000;6001;6002;6003;6004;6005;6006;6007;6008;6009;6010;6011;6012;6013;6014;6015;6016;6017;6018;6019;6534;6535;6536;7407;7408…	3330;4357;4638;5797;5801;5981;6017;6019;6534;6535;7409;7924;8288;8325;9176;9196;9197;9259;9870;9955	73;74	1;31	0.584883	1
sp|Q91ZA3|PCCA_MOUSE	sp|Q91ZA3|PCCA_MOUSE	3	3	3	>sp|Q02257|PLAK_MOUSE Junction plakoglobin OS=Mus musculus GN=Jup PE=1 SV=3	1	6	6	6	4	6	4	6	4	6	10.9	10.9	10.9	81.8	745	745	0	37.152	By MS/MS	By MS/MS	7.7	10.9	650330	155960	494370	249280	442620	4	14	18	303	190;1152;1153;1379;1801;2022	True;True;True;True;True;True	191;1161;1162;1393;1833;2057	1440;1441;1442;1443;1444;1445;9449;9450;9451;9452;10966;10967;10968;10969;14804;14805;14806;14807;14808;16502;16503;16504;16505;16506;16507	952;953;954;955;956;957;5477;5478;5479;5480;5481;6187;6188;8589;8590;9542;9543;9544	956;5477;5480;6187;8589;9542	210;211	180;193	0.563192	1
sp|Q920B9|SP16H_MOUSE	sp|Q920B9|SP16H_MOUSE	5	5	5	>sp|Q9JIK5|DDX21_MOUSE Nucleolar RNA helicase 2 OS=Mus musculus GN=Ddx21 PE=1 SV=3	1	28	28	28	26	26	26	26	26	26	32.4	32.4	32.4	93.55	851	851	0	323.31	By MS/MS	By MS/MS	30.9	30.3	82058000	25520000	56538000	26418000	48872000	44	45	89	566	26;39;153;214;355;368;448;475;476;493;718;731;773;840;982;1006;1102;1115;1119;1132;1362;1544;1572;1686;1687;1735;1736;1753	True;True;True;True;True;True;True;True;True;True;True;True;True;True;True;True;True;True;True;True;True;True;True;True;True;True;True;True	26;39;154;215;357;371;452;480;481;498;725;738;780;847;990;1014;1111;1124;1128;1141;1376;1571;1599;1600;1715;1716;1765;1766;1784	137;138;220;221;222;223;224;225;226;227;228;229;230;231;232;233;234;235;1052;1589;1590;1591;1592;1593;1594;1595;1596;2638;2639;2640;2641;2642;2643;2644;2645;2769;2770;2771;2772;3264;3265;3266;3267;3268;3269;3270;3271;3497;3498;3499;3500;3501;3502;3503;3504;3505;3506;3507;3508;3576;3577;3578;3579;5154;5241;5242;5243;5244;5245;5246;5645;5646;5647;5648;5649;5650;5651;5652;5653;5654;5655;6165;6166;61…	92;93;145;651;1064;1065;1066;1067;1068;1069;1070;1730;1731;1732;1733;1734;1735;1736;1737;1819;1820;2065;2066;2067;2068;2069;2070;2071;2072;2184;2185;2186;2187;2231;2232;2233;2234;2235;2236;3079;3118;3119;3356;3357;3358;3359;3629;4353;4448;4449;4450;4451;4452;5322;5343;5350;5418;5419;5420;6125;6126;6127;6128;6129;6130;7340;7341;7342;7343;7344;7345;7501;7502;7503;7504;7505;7506;8045;8046;8047;8242;…	92;145;651;1065;1735;1819;2070;2186;2187;2235;3079;3118;3359;3629;4353;4450;5322;5343;5350;5420;6126;7340;7504;8045;8047;8242;8248;8338	358	47	0.540555	1
sp|Q921M3|SF3B3_MOUSE	sp|Q921M3|SF3B3_MOUSE	3	3	3	>sp|P35441|TSP1_MOUSE Thrombospondin-1 OS=Mus musculus GN=Thbs1 PE=1 SV=1	2	5	5	5	4	4	4	4	4	4	5.2	5.2	5.2	129.65	1170	1170;1170	0	31.991	By MS/MS	By MS/MS	4.4	3.9	360270	91128	269140	150740	284800	2	5	7	153	116;604;644;724;1781	True;True;True;True;True	117;611;651;731;1813	752;753;754;4427;4428;4429;4430;4431;4682;5200;14582;14583;14584;14585	489;2678;2679;2680;2823;3091;8451;8452	489;2678;2823;3091;8451			0.529284	1
sp|Q921Y2|IMP3_MOUSE	sp|Q921Y2|IMP3_MOUSE	1	1	1	>sp|P63268|ACTH_MOUSE Actin, gamma-enteric smooth muscle OS=Mus musculus GN=Actg2 PE=1 SV=1;>sp|P68134|ACTS_MOUSE Actin, alpha skeletal muscle OS=Mus musculus GN=Acta1 PE=1 SV=1;>sp|P68033|ACTC_MOUSE Actin, alpha cardiac muscle 1 OS=Mus musculus GN=Actc1 P	4	12	2	2	11	12	2	2	2	2	34.6	7.4	7.4	41.876	376	376;377;377;377	0	15.361	By MS/MS	By MS/MS	32.2	34.6	1875600	683540	1192100	739430	1469500	2	3	5	238	99;310;402;403;464;466;789;798;843;1064;1701;1866	False;False;False;False;False;False;True;False;False;False;False;True	100;312;405;406;468;469;471;796;805;850;1073;1730;1900	624;625;626;627;628;629;630;631;632;633;634;635;636;637;638;639;640;641;642;643;2340;2341;2342;2343;2344;2345;2346;2347;2348;2349;2350;2351;2352;2353;2354;2355;2920;2921;2922;2923;2924;2925;2926;2927;2928;2929;2930;2931;2932;2933;2934;2935;2936;2937;2938;2939;2940;2941;2942;2943;2944;2945;2946;2947;2948;2949;2950;2951;2952;2953;2954;2955;2956;2957;2958;2959;2960;3421;3422;3423;3424;3425;3426;3427…	403;404;405;406;407;408;409;410;411;412;413;414;415;416;417;418;419;420;1545;1546;1547;1548;1897;1898;1899;1900;1901;1902;1903;1904;1905;1906;1907;1908;1909;1910;1911;2147;2148;2149;2150;2151;2152;2153;2155;3432;3433;3434;3435;3464;3465;3466;3644;4701;4702;4703;8105;8106;8107;8108;8109;8110;8111;8112;8113;8114;8115;8116;8117;8118;8119;8120;8121;8865	413;1547;1900;1903;2152;2155;3433;3465;3644;4702;8108;8865	155;156;157;159	45;48;191;326	0.503185	1
sp|Q922B2|SYDC_MOUSE	sp|Q922B2|SYDC_MOUSE	2	2	2	>sp|P43275|H11_MOUSE Histone H1.1 OS=Mus musculus GN=Hist1h1a PE=1 SV=2	1	16	11	11	15	16	10	11	10	11	44.1	39	39	21.785	213	213	0	323.31	By MS/MS	By MS/MS	43.7	44.1	361100000	162090000	199010000	45184000	91943000	68	70	138	171	518;519;746;747;748;757;985;1012;1013;1527;1528;1548;1549;1574;1575;1606	False;False;True;True;True;False;True;True;True;True;True;False;False;True;True;True	523;524;753;754;755;764;993;1020;1021;1553;1554;1555;1575;1576;1602;1603;1634	3777;3778;3779;3780;3781;3782;3783;3784;3785;3786;3787;3788;3789;3790;3791;3792;3793;3794;3795;3796;3797;3798;3799;3800;3801;3802;3803;3804;3805;3806;3807;3808;3809;3810;3811;3812;3813;3814;3815;3816;3817;3818;3819;3820;3821;3822;3823;3824;3825;5363;5364;5365;5366;5367;5368;5369;5370;5371;5372;5373;5374;5375;5376;5377;5378;5379;5380;5381;5382;5383;5384;5385;5386;5387;5388;5389;5390;5391;5392;5393…	2309;2310;2311;2312;2313;2314;2315;2316;2317;2318;2319;2320;2321;2322;2323;2324;2325;2326;2327;2328;2329;2330;2331;2332;2333;2334;2335;3184;3185;3186;3187;3188;3189;3190;3191;3192;3193;3194;3195;3196;3197;3198;3199;3200;3201;3202;3203;3204;3273;3274;3275;3276;3277;3278;3279;3280;3281;3282;3283;3284;3285;3286;3287;3288;3289;3290;3291;3292;3293;3294;3295;4358;4359;4360;4361;4362;4363;4364;4365;4366…	2314;2325;3185;3197;3204;3292;4364;4462;4464;7268;7284;7353;7401;7520;7534;7701			0.491435	1
sp|Q922D8|C1TC_MOUSE	sp|Q922D8|C1TC_MOUSE	4	4	4	>sp|Q9D8E6|RL4_MOUSE 60S ribosomal protein L4 OS=Mus musculus GN=Rpl4 PE=1 SV=3	1	5	5	5	5	5	5	5	5	5	13.6	13.6	13.6	47.153	419	419	0	33.853	By MS/MS	By MS/MS	13.6	13.6	1835700	829960	1005800	675230	1440800	10	7	17	542	42;989;1005;1070;1458	True;True;True;True;True	42;997;1013;1079;1473	240;241;242;243;244;245;246;7497;7498;7499;7500;7501;7502;7503;7504;7607;7608;7609;7610;7611;7612;7613;8200;8201;8202;8203;8204;8205;11506;11507;11508;11509	150;151;152;153;154;155;4399;4447;4717;4718;4719;4720;4721;4722;4723;6469;6470	150;4399;4447;4717;6469			0.468649	1
sp|Q922J9|FACR1_MOUSE	sp|Q922J9|FACR1_MOUSE	2	2	2	>sp|Q9CXW4|RL11_MOUSE 60S ribosomal protein L11 OS=Mus musculus GN=Rpl11 PE=1 SV=4	1	3	3	3	3	3	3	3	3	3	21.3	21.3	21.3	20.252	178	178	0	46.532	By MS/MS	By MS/MS	21.3	21.3	4484800	2383100	2101800	849190	1814900	12	10	22	524	226;1957;2055	True;True;True	227;1991;2091	1681;1682;1683;1684;1685;16058;16059;16060;16061;16062;16063;16064;16065;16066;16067;16068;16069;16070;16071;16072;16073;16752;16753;16754;16755;16756;16757;16758;16759;16760;16761;16762;16763;16764	1115;9298;9299;9300;9301;9302;9303;9304;9305;9306;9307;9308;9309;9310;9311;9312;9313;9708;9709;9710;9711;9712	1115;9310;9710	340	12	0.467899	1
sp|Q922K7|NOP2_MOUSE	sp|Q922K7|NOP2_MOUSE	2	2	2	>sp|P42208|SEPT2_MOUSE Septin-2 OS=Mus musculus GN=Sept2 PE=1 SV=2	1	3	3	3	3	2	3	2	3	2	13	13	13	41.525	361	361	0	20.968	By MS/MS	By MS/MS	13	8.6	378610	122500	256120	133030	330820	5	2	7	166	254;1241;1845	True;True;True	255;1252;1878	1907;1908;1909;1910;1911;10032;10033;15126;15127;15128;15129;15130	1292;1293;5731;5732;8751;8752;8753	1292;5731;8751			0.402122	1
sp|Q922W5|P5CR1_MOUSE;sp|Q922Q4|P5CR2_MOUSE	sp|Q922W5|P5CR1_MOUSE;sp|Q922Q4|P5CR2_MOUSE	1;1	1;1	1;1	>sp|P61620|S61A1_MOUSE Protein transport protein Sec61 subunit alpha isoform 1 OS=Mus musculus GN=Sec61a1 PE=2 SV=2;>sp|Q9JLR1|S61A2_MOUSE Protein transport protein Sec61 subunit alpha isoform 2 OS=Mus musculus GN=Sec61a2 PE=2 SV=3	2	2	2	2	2	2	2	2	2	2	4.2	4.2	4.2	52.264	476	476;476	0	11.732	By matching	By MS/MS	4.2	4.2	437910	189220	248690	107910	370030	0	2	2	220	94;846	True;True	95;853	595;596;597;6241;6242;6243;6244;6245;6246	386;3670	386;3670			0.291625	1
sp|Q922Q8|LRC59_MOUSE	sp|Q922Q8|LRC59_MOUSE	4	4	4	>sp|P10107|ANXA1_MOUSE Annexin A1 OS=Mus musculus GN=Anxa1 PE=1 SV=2	1	8	8	8	7	7	7	7	7	7	23.4	23.4	23.4	38.734	346	346	0	113.63	By MS/MS	By MS/MS	21.1	23.1	2825000	1139500	1685500	495580	1745600	23	25	48	92	204;376;377;574;745;766;875;1808	True;True;True;True;True;True;True;True	205;379;380;581;752;773;882;1840	1522;1523;1524;1525;1526;1527;1528;1529;1530;2802;2803;2804;2805;2806;2807;4203;4204;4205;4206;4207;4208;4209;4210;4211;4212;4213;4214;4215;4216;4217;5355;5356;5357;5358;5359;5360;5361;5362;5596;5597;5598;5599;5600;5601;6472;6473;14887;14888;14889;14890;14891;14892;14893;14894;14895	1024;1025;1026;1027;1028;1029;1835;1836;1837;1838;2532;2533;2534;2535;2536;2537;2538;2539;2540;2541;2542;2543;2544;2545;2546;2547;2548;2549;2550;2551;3176;3177;3178;3179;3180;3181;3182;3183;3316;3317;3318;3803;3804;8628;8629;8630;8631;8632;8633;8634	1029;1835;1837;2541;3180;3318;3803;8634	68	3	0.283902	1
sp|Q922R8|PDIA6_MOUSE	sp|Q922R8|PDIA6_MOUSE	2	2	2	>sp|P16045|LEG1_MOUSE Galectin-1 OS=Mus musculus GN=Lgals1 PE=1 SV=3	1	3	3	3	3	2	3	2	3	2	36.3	36.3	36.3	14.866	135	135	0	35.179	By MS/MS	By MS/MS	36.3	24.4	1828800	677320	1151400	188730	993770	8	8	16	112	43;586;1171	True;True;True	43;593;1181	247;248;249;250;251;252;253;254;255;256;257;258;259;260;261;262;4315;4316;4317;4318;9554;9555	156;157;158;159;160;161;162;163;164;165;166;167;168;169;2608;5520;5521	166;2608;5521	82;83	115;121	0.189913	1
sp|Q99020|ROAA_MOUSE	sp|Q99020|ROAA_MOUSE	2	2	2	>sp|P18608|HMGN1_MOUSE Non-histone chromosomal protein HMG-14 OS=Mus musculus GN=Hmgn1 PE=1 SV=2	1	2	2	2	2	2	2	2	2	2	28.1	28.1	28.1	10.152	96	96	0	13.539	By matching	By MS/MS	28.1	28.1	313070	53338	259740	28879	163570	0	4	4	122	1204;2013	True;True	1214;2048	9758;9759;9760;16438;16439;16440;16441	5618;5619;9509;9510	5618;9510			0.176554	1
sp|Q99JF8|PSIP1_MOUSE	sp|Q99JF8|PSIP1_MOUSE	2	2	2	>sp|Q9CX86|ROA0_MOUSE Heterogeneous nuclear ribonucleoprotein A0 OS=Mus musculus GN=Hnrnpa0 PE=1 SV=1	1	1	1	1	0	1	0	1	0	1	5.2	5.2	5.2	30.53	305	305	0.0040984	6.4097	By matching	By MS/MS	0	5.2	21639	0	21639	0	6850.7	0	2	2	522	1083	TRUE	1092	8309;8310	4773;4774	4774			0	1
sp|Q99KE1|MAOM_MOUSE	sp|Q99KE1|MAOM_MOUSE	1	1	1	>sp|P00405|COX2_MOUSE Cytochrome c oxidase subunit 2 OS=Mus musculus GN=Mtco2 PE=1 SV=1	1	1	1	1	1	1	1	1	1	1	7	7	7	25.976	227	227	0	11.493	By MS/MS	By MS/MS	7	7	78303	62651	15652	0	10307	3	1	4	71	877	TRUE	884	6485;6486;6487	3813;3814;3815;3816	3813	60;61	86;87	0	1
sp|Q99KI0|ACON_MOUSE	sp|Q99KI0|ACON_MOUSE	1	1	1	>sp|Q9JJI8|RL38_MOUSE 60S ribosomal protein L38 OS=Mus musculus GN=Rpl38 PE=3 SV=3	1	3	3	3	2	2	2	2	2	2	35.7	35.7	35.7	8.2038	70	70	0	16.949	By MS/MS	By MS/MS	34.3	18.6	173190	146140	27054	0	17620	2	1	3	571	819;979;2083	True;True;True	826;987;2119	6020;6021;6022;6023;7388;16979	3547;4338;9829	3547;4338;9829			0	1
sp|Q99L45|IF2B_MOUSE	sp|Q99L45|IF2B_MOUSE	1	1	1	>sp|Q05CL8|LARP7_MOUSE La-related protein 7 OS=Mus musculus GN=Larp7 PE=1 SV=2	1	1	1	1	0	1	0	1	0	1	2.5	2.5	2.5	64.802	570	570	0.0042644	6.5048	By matching	By MS/MS	0	2.5	17073	0	17073	0	21837	0	1	1	309	125	TRUE	126	799	523	523			0	1
sp|Q99L47|F10A1_MOUSE	sp|Q99L47|F10A1_MOUSE	2	2	2	>sp|P62141|PP1B_MOUSE Serine/threonine-protein phosphatase PP1-beta catalytic subunit OS=Mus musculus GN=Ppp1cb PE=1 SV=3	1	1	1	1	1	1	1	1	1	1	4	4	4	37.186	327	327	0	7.3257	By MS/MS	By MS/MS	4	4	60568	28509	32059	0	23304	1	1	2	227	52	TRUE	52	298;299;300;301;302	195;196	196			0	1
sp|Q99MN1|SYK_MOUSE	sp|Q99MN1|SYK_MOUSE	2	2	2	>sp|A2AGT5|CKAP5_MOUSE Cytoskeleton-associated protein 5 OS=Mus musculus GN=Ckap5 PE=2 SV=1	1	2	2	2	2	1	2	1	2	1	1.3	1.3	1.3	225.63	2032	2032	0	11.505	By MS/MS	By matching	1.3	0.6	64676	36078	28599	0	34037	2	0	2	33	337;570	True;True	339;577	2512;2513;2514;2515;4182	1654;2522	1654;2522			0	1
sp|Q99MN9|PCCB_MOUSE	sp|Q99MN9|PCCB_MOUSE	1	1	1	>sp|O70133|DHX9_MOUSE ATP-dependent RNA helicase A OS=Mus musculus GN=Dhx9 PE=1 SV=2	1	2	2	2	2	1	2	1	2	1	2	2	2	149.47	1380	1380	0	14.141	By MS/MS	By MS/MS	2	1.2	68328	40277	28051	0	34077	3	3	6	59	14;480	True;True	14;485	65;3529;3530;3531	59;2200;2201;2202;2203;2204	59;2200			0	1
sp|Q99PL5|RRBP1_MOUSE	sp|Q99PL5|RRBP1_MOUSE	69	69	69	>sp|P70302|STIM1_MOUSE Stromal interaction molecule 1 OS=Mus musculus GN=Stim1 PE=1 SV=2	1	1	1	1	1	1	1	1	1	1	1.6	1.6	1.6	77.566	685	685	0.0042373	6.4791	By matching	By MS/MS	1.6	1.6	133520	21006	112510	0	35620	0	1	1	273	1429	TRUE	1444	11272;11273	6380	6380			0	1
sp|Q99PT1|GDIR1_MOUSE	sp|Q99PT1|GDIR1_MOUSE	2	2	2	>sp|Q9CPQ1|COX6C_MOUSE Cytochrome c oxidase subunit 6C OS=Mus musculus GN=Cox6c PE=1 SV=3	1	1	1	1	1	1	1	1	1	1	15.8	15.8	15.8	8.4689	76	76	0.0078585	6.26	By MS/MS	By MS/MS	15.8	15.8	56981	0	56981	0	36635	1	1	2	508	1650	TRUE	1678	13552;13553	7852;7853	7852	333	12	0	1
sp|Q9CPQ1|COX6C_MOUSE	sp|Q9CPQ1|COX6C_MOUSE	1	1	1	>sp|Q91VE6|MK67I_MOUSE MKI67 FHA domain-interacting nucleolar phosphoprotein OS=Mus musculus GN=Nifk PE=1 SV=1	1	1	1	1	0	1	0	1	0	1	7.3	7.3	7.3	36.265	317	317	0	7.1297	By matching	By MS/MS	0	7.3	31193	0	31193	0	39897	0	2	2	476	105	TRUE	106	671;672	434;435	435			0	1
sp|Q9CPY7|AMPL_MOUSE	sp|Q9CPY7|AMPL_MOUSE	3	3	3	>sp|P56399|UBP5_MOUSE Ubiquitin carboxyl-terminal hydrolase 5 OS=Mus musculus GN=Usp5 PE=1 SV=1	1	2	2	2	2	1	2	1	2	1	3.6	3.6	3.6	95.832	858	858	0	12.64	By MS/MS	By matching	3.6	1.7	84352	49744	34609	0	41264	3	0	3	201	1473;2033	True;True	1488;2068	11687;11688;11689;11690;16608	6548;6549;9617	6549;9617			0	1
sp|Q9CQE8|CN166_MOUSE	sp|Q9CQE8|CN166_MOUSE	1	1	1	>sp|P62774|MTPN_MOUSE Myotrophin OS=Mus musculus GN=Mtpn PE=1 SV=2	1	1	1	1	1	1	1	1	1	1	14.4	14.4	14.4	12.861	118	118	0.0096154	6.2023	By MS/MS	By matching	14.4	14.4	175560	112150	63411	0	41300	2	0	2	241	709	TRUE	716	5099;5100;5101;5102	3054;3055	3055			0	1
sp|Q9CQN1|TRAP1_MOUSE	sp|Q9CQN1|TRAP1_MOUSE	2	2	2	>sp|Q9EPE9|AT131_MOUSE Manganese-transporting ATPase 13A1 OS=Mus musculus GN=Atp13a1 PE=2 SV=2	1	3	3	3	2	2	2	2	2	2	2.9	2.9	2.9	132.39	1200	1200	0	17.366	By MS/MS	By MS/MS	2	1.8	83347	44203	39144	0	47064	2	1	3	557	379;401;1089	True;True;True	382;404;1098	2812;2813;2814;2815;2919;8328	1842;1896;4784	1842;1896;4784			0	1
sp|Q9CQS2|NOP10_MOUSE	sp|Q9CQS2|NOP10_MOUSE	1	1	1	>sp|Q60848|HELLS_MOUSE Lymphocyte-specific helicase OS=Mus musculus GN=Hells PE=1 SV=2	1	1	1	1	1	1	1	1	1	1	1.9	1.9	1.9	95.125	821	821	0.004158	6.431	By MS/MS	By matching	1.9	1.9	86756	46077	40679	0	48346	2	0	2	338	1849	TRUE	1883	15228;15229;15230;15231	8802;8803	8803			0	1
sp|Q9CR57|RL14_MOUSE	sp|Q9CR57|RL14_MOUSE	3	3	3	>sp|Q9D0R8|LSM12_MOUSE Protein LSM12 homolog OS=Mus musculus GN=Lsm12 PE=1 SV=1	1	2	2	2	1	2	1	2	1	2	13.8	13.8	13.8	21.701	195	195	0	12.189	By MS/MS	By MS/MS	6.7	13.8	143390	64413	78981	0	51161	1	1	2	536	1180;1634	True;True	1190;1662	9598;9599;9600;9601;13426	5543;7782	5543;7782			0	1
sp|Q9CR67|TMM33_MOUSE	sp|Q9CR67|TMM33_MOUSE	1	1	1	>sp|Q921Y2|IMP3_MOUSE U3 small nucleolar ribonucleoprotein protein IMP3 OS=Mus musculus GN=Imp3 PE=2 SV=1	1	1	1	1	1	1	1	1	1	1	8.2	8.2	8.2	21.777	184	184	0	7.0856	By matching	By MS/MS	8.2	8.2	141500	62755	78749	0	51162	0	1	1	488	1925	TRUE	1959	15875;15876;15877;15878	9212	9212			0	1
sp|Q9CSH3|RRP44_MOUSE	sp|Q9CSH3|RRP44_MOUSE	1	1	1	>sp|P51150|RAB7A_MOUSE Ras-related protein Rab-7a OS=Mus musculus GN=Rab7a PE=1 SV=2	1	1	1	1	1	1	1	1	1	1	6.8	6.8	6.8	23.489	207	207	0.0042735	6.5369	By MS/MS	By MS/MS	6.8	6.8	127580	48526	79057	0	51403	2	1	3	189	435	TRUE	439	3181;3182;3183;3184	2030;2031;2032	2030			0	1
sp|Q9CW03|SMC3_MOUSE	sp|Q9CW03|SMC3_MOUSE	2	2	2	>sp|P24452|CAPG_MOUSE Macrophage-capping protein OS=Mus musculus GN=Capg PE=1 SV=2	1	1	1	1	1	1	1	1	1	1	3.4	3.4	3.4	39.24	352	352	0.0041494	6.4309	By MS/MS	By MS/MS	3.4	3.4	81256	39949	41307	0	52805	2	2	4	133	2015	TRUE	2050	16444;16445;16446;16447	9514;9515;9516;9517	9514	99	265	0	1
sp|Q9CWJ9|PUR9_MOUSE	sp|Q9CWJ9|PUR9_MOUSE	2	2	2	>sp|Q9CQN1|TRAP1_MOUSE Heat shock protein 75 kDa, mitochondrial OS=Mus musculus GN=Trap1 PE=1 SV=1	1	2	2	2	1	1	1	1	1	1	3.5	3.5	3.5	80.208	706	706	0	12.602	By MS/MS	By MS/MS	2.1	1.4	57190	15219	41972	0	53655	1	1	2	512	92;500	True;True	93;505	591;3635;3636	384;2253	384;2253			0	1
sp|Q9CX34|SGT1_MOUSE	sp|Q9CX34|SGT1_MOUSE	2	2	2	>sp|B1AZI6|THOC2_MOUSE THO complex subunit 2 OS=Mus musculus GN=Thoc2 PE=1 SV=1	1	1	1	1	1	1	1	1	1	1	0.7	0.7	0.7	182.77	1594	1594	0.009542	6.1781	By matching	By MS/MS	0.7	0.7	81462	39429	42032	0	53725	0	1	1	35	1499	TRUE	1514	11828;11829;11830;11831	6626	6626			0	1
sp|Q9CX86|ROA0_MOUSE	sp|Q9CX86|ROA0_MOUSE	1	1	1	>sp|Q3V3R1|C1TM_MOUSE Monofunctional C1-tetrahydrofolate synthase, mitochondrial OS=Mus musculus GN=Mthfd1l PE=1 SV=2	1	2	2	2	2	1	2	1	2	1	2.3	2.3	2.3	105.73	977	977	0	11.991	By MS/MS	By MS/MS	2.3	1	107220	61620	45602	0	55486	4	2	6	326	365;1214	True;True	368;1224	2748;2749;2750;2751;9832	1811;1812;1813;1814;1815;5655	1813;5655			0	1
sp|Q9CXW4|RL11_MOUSE	sp|Q9CXW4|RL11_MOUSE	3	3	3	>sp|Q80Y44|DDX10_MOUSE Probable ATP-dependent RNA helicase DDX10 OS=Mus musculus GN=Ddx10 PE=1 SV=2	1	1	1	1	0	1	0	1	0	1	1.4	1.4	1.4	100.74	875	875	0	9.1532	By matching	By MS/MS	0	1.4	46871	0	46871	0	56588	0	0	0	411	40	TRUE	40	236;237	146	146			0	1
sp|Q9CY50|SSRA_MOUSE	sp|Q9CY50|SSRA_MOUSE	2	2	2	>sp|Q6ZQ58|LARP1_MOUSE La-related protein 1 OS=Mus musculus GN=Larp1 PE=1 SV=3	1	1	1	1	1	1	1	1	1	1	1.1	1.1	1.1	121.12	1072	1072	0.0079523	6.3125	By MS/MS	By matching	1.1	1.1	135040	87478	47561	0	57113	1	0	1	390	592	TRUE	599	4338;4339;4340;4341	2622	2622			0	1
sp|Q9CY58|PAIRB_MOUSE	sp|Q9CY58|PAIRB_MOUSE	2	2	2	>sp|Q8C7X2|EMC1_MOUSE ER membrane protein complex subunit 1 OS=Mus musculus GN=Emc1 PE=1 SV=1	1	1	1	1	1	1	1	1	1	1	1.3	1.3	1.3	111.6	997	997	0	9.3359	By MS/MS	By MS/MS	1.3	1.3	110090	62093	48000	0	58623	2	3	5	442	589	TRUE	596	4327;4328;4329;4330	2612;2613;2614;2615;2616	2613			0	1
sp|Q9CY62|RN181_MOUSE	sp|Q9CY62|RN181_MOUSE	1	1	1	>sp|Q64433|CH10_MOUSE 10 kDa heat shock protein, mitochondrial OS=Mus musculus GN=Hspe1 PE=1 SV=2	1	1	1	1	1	1	1	1	1	1	13.7	13.7	13.7	10.963	102	102	0	11.408	By MS/MS	By MS/MS	13.7	13.7	246880	153720	93163	0	60600	1	2	3	371	1971	TRUE	2005	16155;16156;16157;16158	9350;9351;9352	9350			0	1
sp|Q9CYI4|LUC7L_MOUSE	sp|Q9CYI4|LUC7L_MOUSE	1	1	1	>sp|Q3U0V1|FUBP2_MOUSE Far upstream element-binding protein 2 OS=Mus musculus GN=Khsrp PE=1 SV=2	1	3	3	3	3	1	3	1	3	1	5.3	5.3	5.3	76.775	748	748	0	25.267	By MS/MS	By MS/MS	5.3	1.9	112640	64451	48187	0	62595	4	1	5	318	136;1694;2004	True;True;True	137;1723;2039	873;874;875;876;13935;16394	557;558;559;8066;9486	557;8066;9486			0	1
sp|Q9CZM2|RL15_MOUSE	sp|Q9CZM2|RL15_MOUSE	2	2	2	>sp|Q60817|NACA_MOUSE Nascent polypeptide-associated complex subunit alpha OS=Mus musculus GN=Naca PE=1 SV=1;>sp|P70670|NACAM_MOUSE Nascent polypeptide-associated complex subunit alpha, muscle-specific form OS=Mus musculus GN=Naca PE=1 SV=2	2	2	2	2	2	1	2	1	2	1	13.5	13.5	13.5	23.384	215	215;2187	0	178.35	By MS/MS	By MS/MS	13.5	7	949040	752110	196930	0	63632	7	2	9	277	817;1623	True;True	824;1651	6005;6006;6007;6008;6009;6010;6011;13369;13370;13371	3537;3538;3539;3540;3541;3542;3543;7750;7751	3542;7750			0	1
sp|Q9CZU6|CISY_MOUSE	sp|Q9CZU6|CISY_MOUSE	1	1	1	>sp|Q8C4J7|TBL3_MOUSE Transducin beta-like protein 3 OS=Mus musculus GN=Tbl3 PE=2 SV=1	1	2	2	2	2	1	2	1	2	1	2.7	2.7	2.7	88.265	801	801	0	12.104	By MS/MS	By MS/MS	2.7	1.1	55564	0	55564	0	66848	2	1	3	441	82;1989	True;True	83;2024	524;525;526;16288	324;325;9414	325;9414			0	1
sp|Q9CZX8|RS19_MOUSE	sp|Q9CZX8|RS19_MOUSE	2	2	2	>sp|Q8VEJ4|NLE1_MOUSE Notchless protein homolog 1 OS=Mus musculus GN=Nle1 PE=1 SV=4	1	1	1	1	1	1	1	1	1	1	3.1	3.1	3.1	53.133	485	485	0	6.726	By MS/MS	By MS/MS	3.1	3.1	78488	24341	54147	0	69220	3	2	5	467	12	TRUE	12	56;57;58;59;60	50;51;52;53;54	51			0	1
sp|Q9D0E1|HNRPM_MOUSE	sp|Q9D0E1|HNRPM_MOUSE	5	5	5	>sp|Q8CCK0|H2AW_MOUSE Core histone macro-H2A.2 OS=Mus musculus GN=H2afy2 PE=1 SV=3	1	1	1	1	1	1	1	1	1	1	3.2	3.2	3.2	40.092	372	372	0	14.2	By MS/MS	By MS/MS	3.2	3.2	118150	61719	56436	0	69694	4	1	5	443	779	TRUE	786	5693;5694;5695;5696;5697;5698	3376;3377;3378;3379;3380	3379			0	1
sp|Q9D0I9|SYRC_MOUSE	sp|Q9D0I9|SYRC_MOUSE	5	5	5	>sp|Q8CGD2|CRLD1_MOUSE Cysteine-rich secretory protein LCCL domain-containing 1 OS=Mus musculus GN=Crispld1 PE=2 SV=1	1	1	1	1	0	1	0	1	0	1	3	3	3	56.918	500	500	0.0079681	6.3148	By matching	By MS/MS	0	3	230860	0	230860	0	74985	0	1	1	449	317	TRUE	319	2401;2402	1585	1585			0	1
sp|Q9D0K2|SCOT1_MOUSE	sp|Q9D0K2|SCOT1_MOUSE	1	1	1	>sp|Q922K7|NOP2_MOUSE Probable 28S rRNA (cytosine-C(5))-methyltransferase OS=Mus musculus GN=Nop2 PE=1 SV=1	1	2	2	2	1	2	1	2	1	2	2.9	2.9	2.9	86.751	793	793	0	12.587	By MS/MS	By MS/MS	1.9	2.9	66214	0	66214	0	81838	1	2	3	492	499;618	True;True	504;625	3632;3633;3634;4548	2251;2252;2752	2252;2752			0	1
sp|Q9D0R2|SYTC_MOUSE	sp|Q9D0R2|SYTC_MOUSE	2	2	2	>sp|P60766|CDC42_MOUSE Cell division control protein 42 homolog OS=Mus musculus GN=Cdc42 PE=1 SV=2	1	1	1	1	1	1	1	1	1	1	5.2	5.2	5.2	21.258	191	191	0	37.922	By MS/MS	By MS/MS	5.2	5.2	181710	51833	129880	0	84824	2	1	3	214	2100	TRUE	2138	17183;17184;17185;17186	9970;9971;9972	9971			0	1
sp|Q9D0R8|LSM12_MOUSE	sp|Q9D0R8|LSM12_MOUSE	2	2	2	>sp|Q61335|BAP31_MOUSE B-cell receptor-associated protein 31 OS=Mus musculus GN=Bcap31 PE=1 SV=4	1	1	1	1	1	1	1	1	1	1	4.1	4.1	4.1	27.956	245	245	0.0041667	6.4328	By MS/MS	By MS/MS	4.1	4.1	278660	194500	84159	0	85578	2	1	3	348	77	TRUE	78	497;498;499;500;501;502;503	305;306;307	306	234	211	0	1
sp|Q9D0T1|NH2L1_MOUSE	sp|Q9D0T1|NH2L1_MOUSE	2	2	2	>sp|Q9CZU6|CISY_MOUSE Citrate synthase, mitochondrial OS=Mus musculus GN=Cs PE=1 SV=1	1	1	1	1	1	1	1	1	1	1	3.4	3.4	3.4	51.736	464	464	0.0042918	6.5609	By MS/MS	By MS/MS	3.4	3.4	149610	80638	68968	0	88661	5	4	9	530	701	TRUE	708	5050;5051;5052;5053;5054;5055;5056	3028;3029;3030;3031;3032;3033;3034;3035;3036	3036			0	1
sp|Q9D1G1|RAB1B_MOUSE	sp|Q9D1G1|RAB1B_MOUSE	2	2	2	>sp|P55264|ADK_MOUSE Adenosine kinase OS=Mus musculus GN=Adk PE=1 SV=2	1	1	1	1	1	1	1	1	1	1	2.5	2.5	2.5	40.148	361	361	0.0094697	6.1647	By MS/MS	By MS/MS	2.5	2.5	120920	46584	74339	0	95027	1	2	3	199	5	TRUE	5	28;29;30;31	23;24;25	23			0	1
sp|Q9D1R9|RL34_MOUSE	sp|Q9D1R9|RL34_MOUSE	1	1	1	>sp|Q8BWY3|ERF1_MOUSE Eukaryotic peptide chain release factor subunit 1 OS=Mus musculus GN=Etf1 PE=1 SV=4	1	1	1	1	1	1	1	1	1	1	3	3	3	49.03	437	437	0	7.1335	By MS/MS	By MS/MS	3	3	147870	71623	76243	0	97966	1	2	3	436	1223	TRUE	1233	9937;9938;9939;9940;9941;9942	5697;5698;5699	5698			0	1
sp|Q9D6Z1|NOP56_MOUSE	sp|Q9D6Z1|NOP56_MOUSE	8	8	8	>sp|Q9D9M4|PDZD9_MOUSE PDZ domain-containing protein 9 OS=Mus musculus GN=Pdzd9 PE=1 SV=2	1	1	1	1	1	1	1	1	1	1	4.9	4.9	4.9	29.76	266	266	0.0041237	6.4239	By MS/MS	By MS/MS	4.9	4.9	652170	339730	312440	0	100990	2	1	3	545	273	TRUE	275	2064;2065;2066;2067	1368;1369;1370	1369			0	1
sp|Q9D8E6|RL4_MOUSE	sp|Q9D8E6|RL4_MOUSE	5	5	5	>sp|Q9DCH4|EIF3F_MOUSE Eukaryotic translation initiation factor 3 subunit F OS=Mus musculus GN=Eif3f PE=1 SV=2	1	1	1	1	1	1	1	1	1	1	4.7	4.7	4.7	37.984	361	361	0	6.8089	By MS/MS	By MS/MS	4.7	4.7	175990	94793	81192	0	103810	2	1	3	553	1932	TRUE	1966	15909;15910;15911;15912	9223;9224;9225	9224			0	1
sp|Q9D8N0|EF1G_MOUSE	sp|Q9D8N0|EF1G_MOUSE	7	7	7	>sp|P62082|RS7_MOUSE 40S ribosomal protein S7 OS=Mus musculus GN=Rps7 PE=2 SV=1	1	2	2	2	1	2	1	2	1	2	10.8	10.8	10.8	22.127	194	194	0	14.939	By MS/MS	By MS/MS	6.2	10.8	281110	101930	179180	0	104300	1	1	2	226	132;459	True;True	133;463	845;846;847;848;849;850;3378	546;2133	546;2133			0	1
sp|Q9D952|EVPL_MOUSE	sp|Q9D952|EVPL_MOUSE	1	1	1	>sp|Q78XF5|OSTC_MOUSE Oligosaccharyltransferase complex subunit OSTC OS=Mus musculus GN=Ostc PE=2 SV=1	1	1	1	1	1	1	1	1	1	1	8.1	8.1	8.1	16.815	149	149	0	7.3607	By MS/MS	By MS/MS	8.1	8.1	148360	33485	114870	0	104870	2	2	4	398	1995	TRUE	2030	16331;16332;16333;16334;16335;16336	9440;9441;9442;9443	9440			0	1
sp|Q9D9M4|PDZD9_MOUSE	sp|Q9D9M4|PDZD9_MOUSE	1	1	1	>sp|P17095|HMGA1_MOUSE High mobility group protein HMG-I/HMG-Y OS=Mus musculus GN=Hmga1 PE=1 SV=4	1	1	1	1	1	1	1	1	1	1	23.4	23.4	23.4	11.614	107	107	0.0041408	6.4282	By MS/MS	By matching	23.4	23.4	645340	482220	163120	0	106360	3	0	3	116	1009	TRUE	1017	7635;7636;7637;7638	4455;4456;4457	4457			0	1
sp|Q9DB20|ATPO_MOUSE	sp|Q9DB20|ATPO_MOUSE	2	2	2	>sp|Q91VR5|DDX1_MOUSE ATP-dependent RNA helicase DDX1 OS=Mus musculus GN=Ddx1 PE=1 SV=1	1	2	2	2	2	1	2	1	2	1	3	3	3	82.499	740	740	0	17.77	By MS/MS	By matching	3	1.5	195040	99387	95655	0	118480	4	0	4	480	474;497	True;True	479;502	3495;3496;3621;3622;3623;3624;3625;3626;3627	2182;2183;2248;2249	2183;2249			0	1
sp|Q9DB77|QCR2_MOUSE	sp|Q9DB77|QCR2_MOUSE	1	1	1	>sp|Q91WM3|U3IP2_MOUSE U3 small nucleolar RNA-interacting protein 2 OS=Mus musculus GN=Rrp9 PE=1 SV=1	1	1	1	1	1	1	1	1	1	1	2.1	2.1	2.1	52.106	475	475	0	13.106	By MS/MS	By MS/MS	2.1	2.1	163110	65270	97835	0	123390	2	3	5	482	86	TRUE	87	560;561;562;563;564;565	366;367;368;369;370	370			0	1
sp|Q9DBG6|RPN2_MOUSE	sp|Q9DBG6|RPN2_MOUSE	2	2	2	>sp|P03930|ATP8_MOUSE ATP synthase protein 8 OS=Mus musculus GN=Mtatp8 PE=1 SV=1	1	1	1	1	1	1	1	1	1	1	14.9	14.9	14.9	7.7662	67	67	0	6.9613	By MS/MS	By matching	14.9	14.9	441700	248120	193580	0	126180	2	0	2	74	932	TRUE	940	6904;6905;6906;6907	4034;4035	4035			0	1
sp|Q9DBP5|KCY_MOUSE	sp|Q9DBP5|KCY_MOUSE	1	1	1	>sp|Q6ZWY3|RS27L_MOUSE 40S ribosomal protein S27-like OS=Mus musculus GN=Rps27l PE=3 SV=3;>sp|Q6ZWU9|RS27_MOUSE 40S ribosomal protein S27 OS=Mus musculus GN=Rps27 PE=1 SV=3	2	1	1	1	1	1	1	1	1	1	15.5	15.5	15.5	9.4771	84	84;84	0.0078431	6.2563	By MS/MS	By MS/MS	15.5	15.5	404040	224860	179180	0	126980	1	2	3	393	1251	TRUE	1262	10108;10109;10110;10111;10112;10113	5777;5778;5779	5779	257	33	0	1
sp|Q9DBZ1|IKIP_MOUSE	sp|Q9DBZ1|IKIP_MOUSE	1	1	1	>sp|Q64467|G3PT_MOUSE Glyceraldehyde-3-phosphate dehydrogenase, testis-specific OS=Mus musculus GN=Gapdhs PE=2 SV=1	1	2	1	1	2	2	1	1	1	1	5.7	2.5	2.5	47.656	440	440	0	6.7002	By matching	By MS/MS	5.7	5.7	142320	37481	104840	0	127660	0	1	1	373	102;1999	True;False	103;2034	656;657;658;659;16351;16352;16353;16354;16355;16356;16357;16358;16359;16360;16361;16362;16363;16364	430;9454;9455;9456;9457;9458;9459;9460	430;9460			0	1
sp|Q9DCD0|6PGD_MOUSE	sp|Q9DCD0|6PGD_MOUSE	3	3	3	>sp|P08122|CO4A2_MOUSE Collagen alpha-2(IV) chain OS=Mus musculus GN=Col4a2 PE=2 SV=4	1	1	1	1	1	1	1	1	1	1	0.7	0.7	0.7	167.32	1707	1707	0.009434	6.1594	By matching	By MS/MS	0.7	0.7	113900	7067.1	106830	0	128480	0	2	2	83	694	TRUE	701	5012;5013;5014;5015	3011;3012	3012			0	1
sp|Q9DCH4|EIF3F_MOUSE	sp|Q9DCH4|EIF3F_MOUSE	1	1	1	>sp|Q61699|HS105_MOUSE Heat shock protein 105 kDa OS=Mus musculus GN=Hsph1 PE=1 SV=2	1	2	1	1	2	2	1	1	1	1	3.3	1.6	1.6	96.406	858	858	0.0041841	6.44	By MS/MS	By matching	3.3	3.3	193110	92810	100300	0	129030	2	0	2	356	420;632	True;False	423;639	3068;3069;3070;3071;3072;4610;4611;4612;4613	1976;1977;2790;2791	1977;2790			0	1
sp|Q9DCL9|PUR6_MOUSE	sp|Q9DCL9|PUR6_MOUSE	2	2	2	>sp|P97315|CSRP1_MOUSE Cysteine and glycine-rich protein 1 OS=Mus musculus GN=Csrp1 PE=1 SV=3	1	1	1	1	1	1	1	1	1	1	7.8	7.8	7.8	20.583	193	193	0.0042105	6.4653	By MS/MS	By MS/MS	7.8	7.8	450210	272150	178060	0	130430	3	3	6	290	653	TRUE	660	4732;4733;4734;4735;4736;4737;4738;4739;4740	2841;2842;2843;2844;2845;2846	2846			0	1
sp|Q9DCN2|NB5R3_MOUSE	sp|Q9DCN2|NB5R3_MOUSE	1	1	1	>sp|Q6PB66|LPPRC_MOUSE Leucine-rich PPR motif-containing protein, mitochondrial OS=Mus musculus GN=Lrpprc PE=1 SV=2	1	3	3	3	2	2	2	2	2	2	2.9	2.9	2.9	156.61	1392	1392	0	19.368	By MS/MS	By MS/MS	1.8	2.2	203570	95052	108520	0	132880	3	1	4	385	508;1104;1824	True;True;True	513;1113;1857	3666;9111;9112;14999;15000;15001;15002	2272;5324;8705;8706	2272;5324;8706	255	773	0	1
sp|Q9DCT2|NDUS3_MOUSE	sp|Q9DCT2|NDUS3_MOUSE	1	1	1	>sp|Q91YT7|YTHD2_MOUSE YTH domain-containing family protein 2 OS=Mus musculus GN=Ythdf2 PE=2 SV=1	1	1	1	1	1	1	1	1	1	1	1.9	1.9	1.9	62.279	579	579	0	6.7553	By MS/MS	By MS/MS	1.9	1.9	172980	68816	104170	0	133520	2	1	3	484	1483	TRUE	1498	11743;11744;11745;11746;11747;11748	6587;6588;6589	6588			0	1
sp|Q9EPE9|AT131_MOUSE	sp|Q9EPE9|AT131_MOUSE	3	3	3	>sp|Q8CCS6|PABP2_MOUSE Polyadenylate-binding protein 2 OS=Mus musculus GN=Pabpn1 PE=2 SV=3	1	1	1	1	1	1	1	1	1	1	5.3	5.3	5.3	32.296	302	302	0	8.5505	By MS/MS	By MS/MS	5.3	5.3	197310	87072	110240	0	140930	4	3	7	444	0	TRUE	0	0;1;2;3;4;5	0;1;2;3;4;5;6	5			0	1
sp|Q9EPL8|IPO7_MOUSE	sp|Q9EPL8|IPO7_MOUSE	2	2	2	>sp|P49717|MCM4_MOUSE DNA replication licensing factor MCM4 OS=Mus musculus GN=Mcm4 PE=1 SV=1	1	1	1	1	1	1	1	1	1	1	1.5	1.5	1.5	96.735	862	862	0	7.7541	By MS/MS	By MS/MS	1.5	1.5	328410	211940	116470	0	141490	2	2	4	184	160	TRUE	161	1238;1239;1240;1241	808;809;810;811	808			0	1
sp|Q9EQH3|VPS35_MOUSE	sp|Q9EQH3|VPS35_MOUSE	2	2	2	>sp|Q922R8|PDIA6_MOUSE Protein disulfide-isomerase A6 OS=Mus musculus GN=Pdia6 PE=1 SV=3	1	2	2	2	1	2	1	2	1	2	7.3	7.3	7.3	48.1	440	440	0	12.425	By matching	By MS/MS	3.9	7.3	171150	60285	110870	0	142140	0	3	3	495	743;1038	True;True	750;1046	5347;5348;5349;7941;7942;7943	3173;4602;4603	3173;4602			0	1
sp|Q9EQU5|SET_MOUSE	sp|Q9EQU5|SET_MOUSE	1	1	1	>sp|Q6ZWX6|IF2A_MOUSE Eukaryotic translation initiation factor 2 subunit 1 OS=Mus musculus GN=Eif2s1 PE=1 SV=3	1	2	2	2	2	1	2	1	2	1	8.6	8.6	8.6	36.108	315	315	0	143.95	By MS/MS	By matching	8.6	3.8	707430	395610	311820	0	151210	7	0	7	396	1740;2042	True;True	1770;2078	14261;14262;16670;16671;16672;16673;16674;16675;16676;16677	8262;8263;9666;9667;9668;9669;9670	8262;9670	259	255	0	1
sp|Q9ER72|SYCC_MOUSE	sp|Q9ER72|SYCC_MOUSE	1	1	1	>sp|Q8VIJ6|SFPQ_MOUSE Splicing factor, proline- and glutamine-rich OS=Mus musculus GN=Sfpq PE=1 SV=1	1	1	1	1	1	1	1	1	1	1	2.1	2.1	2.1	75.441	699	699	0.007874	6.2677	By MS/MS	By MS/MS	2.1	2.1	282300	157260	125040	0	151320	1	2	3	473	568	TRUE	575	4175;4176;4177;4178	2516;2517;2518	2517			0	1
sp|Q9ERK4|XPO2_MOUSE	sp|Q9ERK4|XPO2_MOUSE	4	4	4	>sp|P26443|DHE3_MOUSE Glutamate dehydrogenase 1, mitochondrial OS=Mus musculus GN=Glud1 PE=1 SV=1	1	1	1	1	1	1	1	1	1	1	1.8	1.8	1.8	61.336	558	558	0.0077519	6.2346	By MS/MS	By matching	1.8	1.8	342750	207470	135280	0	168410	1	0	1	140	2047	TRUE	2083	16687;16688;16689;16690;16691;16692;16693;16694	9679	9679			0	1
sp|Q9ESX5|DKC1_MOUSE	sp|Q9ESX5|DKC1_MOUSE	3	3	3	>sp|Q61598|GDIB_MOUSE Rab GDP dissociation inhibitor beta OS=Mus musculus GN=Gdi2 PE=1 SV=1	1	3	3	3	2	2	2	2	2	2	8.5	8.5	8.5	50.537	445	445	0	18.836	By MS/MS	By MS/MS	6.1	5.2	317480	182520	134950	0	168730	3	4	7	352	383;608;1721	True;True;True	386;615;1751	2831;2832;2833;2834;2835;2836;2837;4488;14154	1847;1848;1849;1850;1851;2714;8202	1849;2714;8202			0	1
sp|Q9JHU4|DYHC1_MOUSE	sp|Q9JHU4|DYHC1_MOUSE	2	2	2	>sp|Q9DBG6|RPN2_MOUSE Dolichyl-diphosphooligosaccharide--protein glycosyltransferase subunit 2 OS=Mus musculus GN=Rpn2 PE=2 SV=1	1	2	2	2	2	1	2	1	2	1	4.9	4.9	4.9	69.062	631	631	0	12.294	By MS/MS	By MS/MS	4.9	2.7	245200	98951	146240	0	180820	3	3	6	549	1194;1761	True;True	1204;1792	9677;9678;9679;9680;9681;9682;9683;9684;9685;9686;9687;14418;14419	5585;5586;5587;5588;5589;8361;8362	5585;8361			0	1
sp|Q9JIF0|ANM1_MOUSE	sp|Q9JIF0|ANM1_MOUSE	1	1	1	>sp|Q62523|ZYX_MOUSE Zyxin OS=Mus musculus GN=Zyx PE=1 SV=2	1	2	2	2	2	1	2	1	2	1	5	5	5	60.545	564	564	0	12.18	By MS/MS	By MS/MS	5	2.1	317530	172930	144600	0	182010	4	2	6	370	596;716	True;True	603;723	4366;5142;5143;5144;5145;5146;5147;5148;5149	2636;3071;3072;3073;3074;3075	2636;3075			0	1
sp|Q9JIK5|DDX21_MOUSE	sp|Q9JIK5|DDX21_MOUSE	28	28	28	>sp|O70310|NMT1_MOUSE Glycylpeptide N-tetradecanoyltransferase 1 OS=Mus musculus GN=Nmt1 PE=1 SV=1	1	1	1	1	1	1	1	1	1	1	2.6	2.6	2.6	56.888	496	496	0.004329	6.5794	By MS/MS	By MS/MS	2.6	2.6	298480	152130	146360	0	182900	1	1	2	62	127	TRUE	128	804;805;806;807;808;809;810;811	525;526	525			0	1
sp|Q9JJ28|FLII_MOUSE	sp|Q9JJ28|FLII_MOUSE	3	3	3	>sp|P07091|S10A4_MOUSE Protein S100-A4 OS=Mus musculus GN=S100a4 PE=1 SV=1	1	2	2	2	2	1	2	1	2	1	14.9	14.9	14.9	11.721	101	101	0	11.863	By MS/MS	By MS/MS	14.9	7.9	586240	308210	278030	0	185970	1	1	2	79	1169;1722	True;True	1179;1752	9549;14155;14156;14157;14158;14159;14160	5518;8203	5518;8203			0	1
sp|Q9JJI8|RL38_MOUSE	sp|Q9JJI8|RL38_MOUSE	3	3	3	>sp|Q5NBX1|COBL_MOUSE Protein cordon-bleu OS=Mus musculus GN=Cobl PE=1 SV=1	1	1	1	1	0	1	0	1	0	1	0.9	0.9	0.9	143.86	1337	1337	0.0079051	6.2893	By matching	By MS/MS	0	0.9	230410	0	230410	0	189200	0	1	1	331	2081	TRUE	2117	16962;16963;16964;16965	9827	9827			0	1
sp|Q9JKB3|YBOX3_MOUSE	sp|Q9JKB3|YBOX3_MOUSE	1	1	1	>sp|Q91VC3|IF4A3_MOUSE Eukaryotic initiation factor 4A-III OS=Mus musculus GN=Eif4a3 PE=2 SV=3	1	1	1	1	1	1	1	1	1	1	3.2	3.2	3.2	46.839	411	411	0	7.2305	By MS/MS	By MS/MS	3.2	3.2	328130	177330	150800	0	190850	4	2	6	475	29	TRUE	29	159;160;161;162;163;164;165;166	100;101;102;103;104;105	105	316	7	0	1
sp|Q9JKF1|IQGA1_MOUSE	sp|Q9JKF1|IQGA1_MOUSE	4	4	4	>sp|Q99KI0|ACON_MOUSE Aconitate hydratase, mitochondrial OS=Mus musculus GN=Aco2 PE=1 SV=1	1	1	1	1	1	1	1	1	1	1	1.9	1.9	1.9	85.462	780	780	0	7.1824	By MS/MS	By MS/MS	1.9	1.9	373740	209960	163780	0	202870	1	3	4	499	1349	TRUE	1363	10674;10675;10676;10677;10678;10679;10680;10681	6063;6064;6065;6066	6065			0	1
sp|Q9JMA1|UBP14_MOUSE	sp|Q9JMA1|UBP14_MOUSE	1	1	1	>sp|P52927|HMGA2_MOUSE High mobility group protein HMGI-C OS=Mus musculus GN=Hmga2 PE=1 SV=1	1	3	3	3	2	2	2	2	2	2	36.1	36.1	36.1	11.819	108	108	0	23.794	By MS/MS	By MS/MS	32.4	36.1	422540	111300	311240	0	202940	4	3	7	194	647;1010;1482	True;True;True	654;1018;1497	4693;4694;7639;7640;7641;7642;11741;11742	2829;2830;4458;4459;4460;6585;6586	2829;4460;6585			0	1
sp|Q9JMH6|TRXR1_MOUSE	sp|Q9JMH6|TRXR1_MOUSE	1	1	1	>sp|Q8BVY0|RL1D1_MOUSE Ribosomal L1 domain-containing protein 1 OS=Mus musculus GN=Rsl1d1 PE=2 SV=1	1	1	1	1	1	1	1	1	1	1	4	4	4	50.421	452	452	0	15.523	By MS/MS	By MS/MS	4	4	528390	324060	204320	0	208980	6	6	12	433	186	TRUE	187	1407;1408;1409;1410;1411;1412;1413;1414;1415;1416;1417;1418	930;931;932;933;934;935;936;937;938;939;940;941	933			0	1
sp|Q9QUM9|PSA6_MOUSE	sp|Q9QUM9|PSA6_MOUSE	1	1	1	>sp|Q61990|PCBP2_MOUSE Poly(rC)-binding protein 2 OS=Mus musculus GN=Pcbp2 PE=1 SV=1	1	3	1	1	3	3	1	1	1	1	12.2	3.6	3.6	38.221	362	362	0	7.5253	By MS/MS	By MS/MS	12.2	12.2	456250	262190	194060	0	248090	3	3	6	363	521;856;883	False;True;False	526;863;891	3833;3834;3835;3836;3837;3838;3839;3840;3841;3842;3843;3844;6301;6302;6303;6304;6305;6306;6521;6522;6523;6524;6525;6526;6527;6528;6529;6530;6531;6532	2337;2338;2339;2340;2341;2342;2343;2344;3710;3711;3712;3713;3714;3715;3834;3835;3836;3837;3838;3839;3840;3841	2340;3710;3841	153	137	0	1
sp|Q9QUR6|PPCE_MOUSE	sp|Q9QUR6|PPCE_MOUSE	3	3	3	>sp|Q9CY58|PAIRB_MOUSE Plasminogen activator inhibitor 1 RNA-binding protein OS=Mus musculus GN=Serbp1 PE=1 SV=2	1	2	2	2	2	1	2	1	2	1	6.6	6.6	6.6	44.714	407	407	0	108.29	By MS/MS	By MS/MS	6.6	3.9	513430	283130	230300	0	279900	7	5	12	526	1467;1475	True;True	1482;1490	11652;11692;11693;11694;11695;11696;11697;11698;11699;11700;11701;11702	6538;6551;6552;6553;6554;6555;6556;6557;6558;6559;6560;6561	6538;6555			0	1
sp|Q9QXS1|PLEC_MOUSE	sp|Q9QXS1|PLEC_MOUSE	19	19	19	>sp|Q9DB77|QCR2_MOUSE Cytochrome b-c1 complex subunit 2, mitochondrial OS=Mus musculus GN=Uqcrc2 PE=1 SV=1	1	1	1	1	1	1	1	1	1	1	3.5	3.5	3.5	48.234	453	453	0.0021882	6.6102	By MS/MS	By MS/MS	3.5	3.5	421370	196810	224560	0	283200	3	2	5	548	303	TRUE	305	2278;2279;2280;2281;2282;2283;2284;2285	1514;1515;1516;1517;1518	1516			0	1
sp|Q9QY76|VAPB_MOUSE;sp|Q9WV55|VAPA_MOUSE	sp|Q9QY76|VAPB_MOUSE;sp|Q9WV55|VAPA_MOUSE	2;1	2;1	2;1	>sp|Q9WTI7|MYO1C_MOUSE Unconventional myosin-Ic OS=Mus musculus GN=Myo1c PE=1 SV=2	1	2	2	2	1	2	1	2	1	2	2.6	2.6	2.6	121.94	1063	1063	0	11.589	By MS/MS	By MS/MS	0.9	2.6	774590	168860	605730	0	284820	2	2	4	586	1146;1972	True;True	1155;2006	9393;9394;9395;9396;9397;9398;9399;9400;9401;9402;16159	5464;5465;5466;9353	5466;9353			0	1
sp|Q9QZQ8|H2AY_MOUSE	sp|Q9QZQ8|H2AY_MOUSE	4	4	4	>sp|Q9ESX5|DKC1_MOUSE H/ACA ribonucleoprotein complex subunit 4 OS=Mus musculus GN=Dkc1 PE=1 SV=4	1	3	3	3	2	2	2	2	2	2	7.9	7.9	7.9	57.401	509	509	0	19.086	By MS/MS	By MS/MS	5.5	4.3	402850	173760	229090	0	286870	3	5	8	563	47;397;1843	True;True;True	47;400;1876	279;280;281;282;283;2908;2909;15124	180;181;182;183;184;1891;1892;8749	183;1892;8749			0	1
sp|Q9R0P5|DEST_MOUSE	sp|Q9R0P5|DEST_MOUSE	2	2	2	>sp|P56135|ATPK_MOUSE ATP synthase subunit f, mitochondrial OS=Mus musculus GN=Atp5j2 PE=1 SV=3	1	1	1	1	1	1	1	1	1	1	10.2	10.2	10.2	10.344	88	88	0.0021692	6.5804	By MS/MS	By MS/MS	10.2	10.2	856910	367510	489390	0	332160	2	2	4	200	261	TRUE	262	1965;1966;1967;1968;1969	1322;1323;1324;1325	1325			0	1
sp|Q9R0Q7|TEBP_MOUSE	sp|Q9R0Q7|TEBP_MOUSE	1	1	1	>sp|Q9Z1N5|DX39B_MOUSE Spliceosome RNA helicase Ddx39b OS=Mus musculus GN=Ddx39b PE=1 SV=1;>sp|Q8VDW0|DX39A_MOUSE ATP-dependent RNA helicase DDX39A OS=Mus musculus GN=Ddx39a PE=2 SV=1	2	2	2	2	2	2	2	2	2	2	5.6	5.6	5.6	49.035	428	428;427	0	28.196	By MS/MS	By MS/MS	5.6	5.6	581390	306870	274510	0	338350	6	5	11	595	691;876	True;True	698;883	4991;4992;4993;6474;6475;6476;6477;6478;6479;6480;6481;6482;6483;6484	2992;2993;2994;3805;3806;3807;3808;3809;3810;3811;3812	2992;3809			0	1
sp|Q9WTI7|MYO1C_MOUSE	sp|Q9WTI7|MYO1C_MOUSE	2	2	2	>sp|P13020|GELS_MOUSE Gelsolin OS=Mus musculus GN=Gsn PE=1 SV=3	1	1	1	1	1	1	1	1	1	1	1.7	1.7	1.7	85.941	780	780	0	7.2323	By MS/MS	By MS/MS	1.7	1.7	669680	397450	272230	0	341090	4	2	6	104	1534	TRUE	1561	12596;12597;12598;12599;12600;12601;12602;12603	7299;7300;7301;7302;7303;7304	7301			0	1
sp|Q9WU62|INCE_MOUSE	sp|Q9WU62|INCE_MOUSE	2	2	2	>sp|P25976|UBF1_MOUSE Nucleolar transcription factor 1 OS=Mus musculus GN=Ubtf PE=1 SV=1	1	1	1	1	1	1	1	1	1	1	1.6	1.6	1.6	89.508	765	765	0.0080321	6.3416	By MS/MS	By matching	1.6	1.6	613750	337550	276200	0	343530	2	0	2	136	580	TRUE	587	4282;4283;4284;4285;4286;4287;4288;4289	2597;2598	2597			0	1
sp|Q9WU78|PDC6I_MOUSE	sp|Q9WU78|PDC6I_MOUSE	1	1	1	>sp|Q3U3V8|XRRA1_MOUSE X-ray radiation resistance-associated protein 1 OS=Mus musculus GN=Xrra1 PE=2 SV=1	1	1	1	1	1	1	1	1	1	1	1.7	1.7	1.7	88.883	786	786	0.0021834	6.5989	By MS/MS	By MS/MS	1.7	1.7	1488700	867030	621620	0	395820	2	1	3	320	1336	TRUE	1350	10608;10609;10610;10611;10612;10613;10614;10615;10616;10617	6025;6026;6027	6027	222;223;224	1;6;9	0	1
sp|Q9WUA2|SYFB_MOUSE	sp|Q9WUA2|SYFB_MOUSE	2	2	2	>sp|Q8BHN3|GANAB_MOUSE Neutral alpha-glucosidase AB OS=Mus musculus GN=Ganab PE=1 SV=1	1	2	2	2	1	1	1	1	1	1	2.2	2.2	2.2	106.91	944	944	0	11.394	By MS/MS	By MS/MS	1	1.3	965920	0	965920	0	414050	1	1	2	417	1264;1594	True;True	1275;1622	10216;10217;10218;10219;10220;10221;13185	5816;7660	5816;7660	273	1	0	1
sp|Q9WUB3|PYGM_MOUSE;sp|Q8CI94|PYGB_MOUSE;sp|Q9ET01|PYGL_MOUSE	sp|Q9WUB3|PYGM_MOUSE;sp|Q8CI94|PYGB_MOUSE;sp|Q9ET01|PYGL_MOUSE	2;1;1	2;1;1	2;1;1	>sp|P63260|ACTG_MOUSE Actin, cytoplasmic 2 OS=Mus musculus GN=Actg1 PE=1 SV=1	1	15	1	1	13	15	1	1	1	1	47.2	4.5	4.5	41.792	375	375	0	10.548	By MS/MS	By MS/MS	38.7	47.2	393220	68678	324540	0	415420	3	4	7	262	99;310;336;402;403;442;464;466;788;798;843;1060;1064;1701;1867	False;False;False;False;False;True;False;False;False;False;False;False;False;False;False	100;312;338;405;406;446;468;469;471;795;805;850;1069;1073;1730;1901	624;625;626;627;628;629;630;631;632;633;634;635;636;637;638;639;640;641;642;643;2340;2341;2342;2343;2344;2345;2346;2347;2348;2349;2350;2351;2352;2353;2354;2355;2504;2505;2506;2507;2508;2509;2510;2511;2920;2921;2922;2923;2924;2925;2926;2927;2928;2929;2930;2931;2932;2933;2934;2935;2936;2937;2938;2939;2940;2941;2942;2943;2944;2945;2946;2947;2948;2949;2950;2951;2952;2953;2954;2955;2956;2957;2958;2959…	403;404;405;406;407;408;409;410;411;412;413;414;415;416;417;418;419;420;1545;1546;1547;1548;1653;1897;1898;1899;1900;1901;1902;1903;1904;1905;1906;1907;1908;1909;1910;1911;2048;2049;2050;2051;2052;2053;2054;2147;2148;2149;2150;2151;2152;2153;2155;3417;3418;3419;3420;3421;3422;3423;3424;3425;3426;3427;3428;3429;3430;3431;3464;3465;3466;3644;4689;4701;4702;4703;8105;8106;8107;8108;8109;8110;8111;81…	413;1547;1653;1900;1903;2051;2152;2155;3422;3465;3644;4689;4702;8108;8870	155;156;157;158;159;187	16;44;47;190;227;325	0	1
sp|Q9WVA4|TAGL2_MOUSE;sp|Q9R1Q8|TAGL3_MOUSE	sp|Q9WVA4|TAGL2_MOUSE;sp|Q9R1Q8|TAGL3_MOUSE	4;3	4;3	4;3	>sp|Q6IRU2|TPM4_MOUSE Tropomyosin alpha-4 chain OS=Mus musculus GN=Tpm4 PE=2 SV=3	1	1	1	1	1	1	1	1	1	1	4.4	4.4	4.4	28.467	248	248	0	7.1112	By MS/MS	By MS/MS	4.4	4.4	1315100	480920	834190	0	424000	3	4	7	382	108	TRUE	109	680;681;682;683;684;685;686;687;688;689;690;691;692;693	443;444;445;446;447;448;449	449			0	1
sp|Q9Z0N1|IF2G_MOUSE;sp|Q9Z0N2|IF2H_MOUSE	sp|Q9Z0N1|IF2G_MOUSE	3;1	3;1	3;1	>sp|Q8BV57|SRCRL_MOUSE Soluble scavenger receptor cysteine-rich domain-containing protein SSC5D OS=Mus musculus GN=Ssc5d PE=1 SV=1	1	1	1	1	0	1	0	1	0	1	1.1	1.1	1.1	144.63	1371	1371	0.008016	6.3314	By matching	By MS/MS	0	1.1	1310000	0	1310000	0	432140	0	1	1	431	1428	TRUE	1443	11269;11270;11271	6379	6379	279	642	0	1
sp|Q9Z0X1|AIFM1_MOUSE	sp|Q9Z0X1|AIFM1_MOUSE	2	2	2	>sp|P63158|HMGB1_MOUSE High mobility group protein B1 OS=Mus musculus GN=Hmgb1 PE=1 SV=2	1	1	1	1	1	1	1	1	1	1	7	7	7	24.893	215	215	0	6.8169	By matching	By MS/MS	7	7	1620800	914670	706110	0	516920	0	1	1	261	860	TRUE	867	6359;6360;6361;6362;6363;6364;6365;6366;6367;6368;6369;6370;6371;6372;6373;6374	3741	3741			0	1
sp|Q9Z1N2|ORC1_MOUSE	sp|Q9Z1N2|ORC1_MOUSE	1	1	1	>sp|P62918|RL8_MOUSE 60S ribosomal protein L8 OS=Mus musculus GN=Rpl8 PE=1 SV=2	1	1	1	1	1	1	1	1	1	1	4.3	4.3	4.3	28.024	257	257	0	9.6833	By MS/MS	By MS/MS	4.3	4.3	4002300	2515500	1486800	0	1624300	7	7	14	253	326	TRUE	328	2460;2461;2462;2463;2464;2465;2466;2467;2468;2469;2470;2471;2472	1615;1616;1617;1618;1619;1620;1621;1622;1623;1624;1625;1626;1627;1628	1618			0	1
sp|Q9Z1N5|DX39B_MOUSE;sp|Q8VDW0|DX39A_MOUSE	sp|Q9Z1N5|DX39B_MOUSE;sp|Q8VDW0|DX39A_MOUSE	2;1	2;1	2;1	>sp|P26040|EZRI_MOUSE Ezrin OS=Mus musculus GN=Ezr PE=1 SV=3	1	3	2	2	3	2	2	1	2	1	7	3.8	3.8	69.406	586	586	0	11.8	By MS/MS	By MS/MS	7	4.4	2407700	536550	1871200	0	1850800	1	1	2	138	1430;1635;2034	True;True;False	1445;1663;2069	11274;11275;11276;11277;11278;11279;11280;11281;11282;11283;13427;16609;16610;16611;16612;16613;16614;16615;16616;16617;16618;16619;16620;16621;16622;16623;16624;16625	6381;7783;9618;9619;9620;9621;9622;9623;9624;9625;9626;9627;9628;9629;9630;9631;9632	6381;7783;9627	103	12	0	1
sp|Q9Z1Q5|CLIC1_MOUSE	sp|Q9Z1Q5|CLIC1_MOUSE	3	3	3	>sp|A2AWA9|RBGP1_MOUSE Rab GTPase-activating protein 1 OS=Mus musculus GN=Rabgap1 PE=1 SV=1	1	1	1	1	1	1	1	1	1	1	1.8	1.8	1.8	120.8	1064	1064	0	7.8884	By MS/MS	By MS/MS	1.8	1.8	5843600	0	5843600	0	2537200	1	3	4	34	997	TRUE	1005	7532;7533;7534;7535;7536;7537	4411;4412;4413;4414;4415	4415			0	1
sp|Q9Z1Q9|SYVC_MOUSE	sp|Q9Z1Q9|SYVC_MOUSE	14	14	14	>sp|Q8BFZ3|ACTBL_MOUSE Beta-actin-like protein 2 OS=Mus musculus GN=Actbl2 PE=1 SV=1	1	6	1	1	6	6	1	1	1	1	19.7	4.8	4.8	42.004	376	376	0.0060484	6.3532	By MS/MS	By MS/MS	19.7	19.7	28670000	13189000	15481000	0	18307000	1	2	3	413	336;798;843;1064;1701;1865	False;False;False;False;False;True	338;805;850;1073;1730;1899	2504;2505;2506;2507;2508;2509;2510;2511;5848;5849;5850;5851;5852;5853;5854;5855;5856;5857;5858;5859;5860;6197;6198;6199;6200;6201;6202;6203;6204;6205;6206;6207;6208;6209;6210;8161;8162;8163;8164;8165;8166;8167;8168;8169;8170;8171;8172;8173;13977;13978;13979;13980;13981;13982;13983;13984;13985;13986;13987;13988;13989;13990;13991;13992;13993;13994;13995;13996;13997;15320;15321;15322;15323;15324;153…	1653;3464;3465;3466;3644;4701;4702;4703;8105;8106;8107;8108;8109;8110;8111;8112;8113;8114;8115;8116;8117;8118;8119;8120;8121;8862;8863;8864	1653;3465;3644;4702;8108;8864	156;157;159	45;48;191	0	1
sp|Q9Z204|HNRPC_MOUSE	sp|Q9Z204|HNRPC_MOUSE	2	2	2	>sp|Q9D952|EVPL_MOUSE Envoplakin OS=Mus musculus GN=Evpl PE=2 SV=3	1	1	1	1	1	1	1	1	1	1	0.5	0.5	0.5	232.01	2035	2035	0.0042463	6.4934	By MS/MS	By MS/MS	0.5	0.5	73867000	10866000	63001000	0	25355000	6	7	13	544	1461	TRUE	1476	11570;11571;11572;11573;11574;11575;11576;11577;11578;11579;11580;11581;11582;11583;11584;11585	6504;6505;6506;6507;6508;6509;6510;6511;6512;6513;6514;6515;6516	6511	350	1011	0	1
sp|Q9Z2U0|PSA7_MOUSE;sp|Q9CWH6|PSA7L_MOUSE	sp|Q9Z2U0|PSA7_MOUSE;sp|Q9CWH6|PSA7L_MOUSE	3;2	3;2	3;2	>sp|Q3UV17|K22O_MOUSE Keratin, type II cytoskeletal 2 oral OS=Mus musculus GN=Krt76 PE=2 SV=1	3	11	1	1	8	10	1	1	1	1	13	1.5	1.5	62.844	594	594;521;521	0	45.584	By MS/MS	By MS/MS	9.8	13	55447000	21610000	33837000	0	34820000	6	5	11	324	66;236;548;576;577;991;1047;1137;1147;1561;1565	False;True;False;False;False;False;False;False;False;False;False	66;237;555;583;584;999;1055;1146;1156;1588;1592	383;384;385;1739;1740;1741;1742;1743;1744;1745;1746;1747;1748;1749;1750;1751;1752;4043;4219;4220;4221;4222;4223;4224;4225;4226;4227;4228;4229;4230;4231;4232;4233;7509;7510;7511;7512;8029;8030;8031;8032;8033;8034;8035;8036;9337;9338;9339;9340;9341;9342;9343;9344;9345;9346;9347;9348;9349;9350;9351;9352;9403;9404;9405;9406;12851;12852;12875;12876	245;1151;1152;1153;1154;1155;1156;1157;1158;1159;1160;1161;2448;2553;2554;2555;2556;2557;2558;4402;4403;4650;4651;4652;4653;4654;5443;5444;5445;5446;5447;5448;5449;5450;5467;7447;7462;7463	245;1153;2448;2553;2557;4402;4652;5446;5467;7447;7462	6	456	0	1
sp|Q9Z2X1|HNRPF_MOUSE	sp|Q9Z2X1|HNRPF_MOUSE	1	1	1	>sp|Q9CY62|RN181_MOUSE E3 ubiquitin-protein ligase RNF181 OS=Mus musculus GN=Rnf181 PE=2 SV=1	1	1	1	1	1	1	1	1	1	1	4.8	4.8	4.8	19.1	165	165	0	9.9499	By MS/MS	By MS/MS	4.8	4.8	770800000	150150000	620650000	0	473010000	3	1	4	527	324	TRUE	326	2436;2437;2438;2439;2440;2441;2442;2443;2444;2445;2446;2447;2448;2449;2450;2451;2452;2453;2454;2455;2456	1608;1609;1610;1611;1612	1609			0	1
[truncated: 9 more columns]
