# Supplementary material for: TRF1 averts chromatin remodelling, recombination and replication dependent-break induced replication at mouse telomeres
Source: eLife. 2020 Jan 14;9:e49817. doi: 10.7554/eLife.49817 (PMC6986873; doi:10.7554/eLife.49817)
Supplement: Figure 2—figure supplement 1—source data 1. — Related to Figure 2—figure supplement 1A. [file elife-49817-fig2-figsupp1-data1.xlsx]

## Sheet: Figure 2S1A
	quantification Figure S1B
		GFP	GFP	GFP	GFP	CRE	CRE	CRE	CRE
	TRF2	1	1	1	1	0.55	1.02	1.09	0.62
	TRF1	1	1	1		1	0.5	1.56
	BAZ1b	1	1	1		1.16	1.35	0.88
	p66a	1	1	1		1.31	1.99	1.06
	BRCA1	1	1	1		1.05	0	0.7
	MTA1	1	1	1		0.86	1.25	1
	ZNF827	1	1			1.31	1
	CHD4	1	1	1	1	1.23	1.96	0.39	0.99
