# Supplementary material for: TRF1 averts chromatin remodelling, recombination and replication dependent-break induced replication at mouse telomeres
Source: eLife. 2020 Jan 14;9:e49817. doi: 10.7554/eLife.49817 (PMC6986873; doi:10.7554/eLife.49817)
Supplement: Figure 2—figure supplement 1—source data 2. — Related to Figure 2—figure supplement 1B. [file elife-49817-fig2-figsupp1-data2.xlsx]

## Sheet: Figure 2S1B
			DMSO		Aph
		TRF2	1	1	0.38	0.44
		BRCA1	1	1	0.36	0.79
		MTA1	1	1	0.66	1.33
		ChD4	1	1	0.18	0.51
		ZNF827	1	1	0.28	1.14
		BAZ1b	1	1	0.36	0.45
