# Supplementary material for: TRF1 averts chromatin remodelling, recombination and replication dependent-break induced replication at mouse telomeres
Source: eLife. 2020 Jan 14;9:e49817. doi: 10.7554/eLife.49817 (PMC6986873; doi:10.7554/eLife.49817)
Supplement: Figure 2—figure supplement 1—source data 3. — Related to Figure 2—figure supplement 1C. [file elife-49817-fig2-figsupp1-data3.xlsx]

## Sheet: Figure 2S1C
	N. of PML co-localizing/total n.of PML					Total N. of PML
	DMSO	Aph				DMSO	Aph
	0.17	0.05				18	22
	0.24	0.33				17	15
	0.13	0.2				8	25
	0.33	0.18				3	17
	0.2	0.14				5	7
	0.25	0.2				8	5
	0.13	0				8	10
	0	0.09				3	11
	0	0.14				6	7
	0.2	0.25				10	8
	0.33	0.12				3	17
	0.13	0				8	3
	0.14	0				7	6
	0.25	0.13				8	8
	0.22	0				9	8
	0	0.13				2	8
	0.12	0.07				17	27
	0	0.08				4	26
	0.14	0.08				7	13
	0	0				12	9
	0.19	0				16	12
	0	0				10	24
	0.2	0.15				5	13
	0.14	0.14				7	21
	0.25	0.2				4	15
	0	0				5	5
	0.1	0.14				10	7
	0	0				2	6
	0.17	0.21				6	19
	0.19	0.05				16	22
	0.25	0.18				4	11
	0.5	0.25				4	12
	0.44	0				9	12
	0	0.18				6	11
	0.25	0.04				4	23
	0	0.1				7	30
	0.33	0.08				6	26
	0.25	0				4	4
	0	0.25				5	12
	0.21	0.05				19	37
	0.4	0				5	8
	0	0				3	6
	0.14	0				7	13
	0	0.25				6	4
	0.33	0.26				3	53
	0	0				6	15
	0	0.16				3	19
	0	0.06				4	16
	0.17	0.18				6	11
	0.5	0.25				2	4
	0.25	0.29				4	7
	0.25	0				4	17
	0.33	0				3	5
	0.33	0.5				3	4
	0.67	0.24				3	33
	0.33	0.25				3	16
	0	0.22				2	9
	0	0.15				3	13
	0	0.15				2	33
	0	0.13				7	8
	0.2	0.15				5	13
	0.4	0.08				5	12
	0.33	0.14				3	7
	0.14	0.17				7	12
	0.5	0.2				4	5
	0.5	0				4	9
	0.09	0.27				11	15
	0.18	0.13				17	15
	0.25	0.4				4	5
	0.17	0.5				6	2
	0.24	0.15				17	13
	0	0.09				3	11
	0.33	0.1				6	21
	0.09	0				11	14
	0	0.1				5	42
	0	0.29				4	7
	0.4	0				5	11
	0.17	0.29				6	7
	0	0.13				7	8
	0.1	0.07				10	15
	0	0.13				2	16
	0	0				2	1
	0.25	0.18				4	11
	0	0				4	19
	0.13	0.38				8	21
	0.2	0.14				5	21
	0.1	0.28				10	18
	0	0.18				2	11
	0	0.14				2	7
	0.17	0.15				6	20
	0.14	0.07				7	15
	0.6	0.06				5	34
	0.4	0.08				5	12
	0.4	0.2				5	15
	0	0				2	2
	0.25	0				8	4
	0	0.14				4	7
	0.25	0.23				4	13
	0.17	0.17				6	12
	0.22	0				9	4
	0	0.25				9	12
	0.22	0.23				9	13
	0.33	0.11				3	19
	0	0				3	3
	0.33	0				3	8
	0.5	0.42				2	19
	0.33	0.1				3	39
	0.2	0.18				5	17
	0.09	0.33				11	3
