# Supplementary material for: TRF1 averts chromatin remodelling, recombination and replication dependent-break induced replication at mouse telomeres
Source: eLife. 2020 Jan 14;9:e49817. doi: 10.7554/eLife.49817 (PMC6986873; doi:10.7554/eLife.49817)
Supplement: Figure 2—figure supplement 2—source data 2. — Related to Figure 2—figure supplement 2B. [file elife-49817-fig2-figsupp2-data2.xlsx]

## Sheet: Figure 2S2B
	DMSO				Aph
	single	double			single	double
	0	0			0.0176991	0
	0	0			0	0.00793651
	0.010989	0			0.0229885	0
	0	0			0.027027	0.0135135
	0.00826446	0			0.0102041	0.0102041
	0	0			0.0210526	0
	0.00980392	0.00980392			0.0107527	0
	0	0.0169492			0.016	0
	0	0			0	0
	0	0			0	0
	0	0			0.00952381	0.00952381
	0	0			0	0
	0.00854701	0			0	0.00884956
	0	0			0	0.00952381
	0	0			0	0
	0	0			0	0
	0.00925926	0			0.0144928	0
	0.00877193	0			0.0206186	0.0103093
	0	0			0.027027	0
	0.00917431	0			0	0
	0.00416667	0.00833333			0.00666667	0
	0	0			0.01	0
	0	0			0	0
	0	0			0.00591716	0.00591716
	0	0			0	0
	0.00606061	0.00606061			0	0.032967
	0	0			0	0
	0	0			0	0
