# Supplementary material for: TRF1 averts chromatin remodelling, recombination and replication dependent-break induced replication at mouse telomeres
Source: eLife. 2020 Jan 14;9:e49817. doi: 10.7554/eLife.49817 (PMC6986873; doi:10.7554/eLife.49817)
Supplement: Figure 2—source data 1. — Related to Figure 2A. [file elife-49817-fig2-data1.xlsx]

## Sheet: Figure 1F
LFQ intensity 007_Deletion_01	LFQ intensity 007_Deletion_02	LFQ intensity 007_Scramble_01	LFQ intensity 007_Scramble_02	LFQ intensity 007_Telomere_01	LFQ intensity 007_Telomere_02	t-test Significant log2 fold change [Telomere right / Deletion left]	Score	Intensity	Q-value	-Log t-test p value log2 fold change [Telomere right / Deletion left]	t-test Difference log2 fold change [Telomere right / Deletion left]	Protein IDs	Majority protein IDs	Protein names	Gene names
25.9355	26.2414	15.7301	15.5242	16.3349	16.8067	+	161.33	24.7158	0	3.0598	-9.51768	H3BK67;H3BK13;H3BL55;H3BKM3;H3BKF8;Q8BJA3;H3BJ31	H3BK67;H3BK13;H3BL55;H3BKM3;H3BKF8;Q8BJA3;H3BJ31	Homeobox-containing protein 1	Hmbox1
25.1771	25.1028	16.8419	17.0788	16.9983	16.7919	+	260.73	23.6852	0	3.75183	-8.24484	P70399;F6ZRL3;A2AU90;F6QNC8;F7CE65	P70399	Tumor suppressor p53-binding protein 1	Tp53bp1
25.2318	25.0216	17.6432	19.0922	17.3223	16.9649	+	135.1	23.7189	0	3.17154	-7.98309	Q5SWU9;V9GWS0;D3Z0B3;A0A0R4J1S9;V9GWR9;V9GWS1;V9GXY1	Q5SWU9	Acetyl-CoA carboxylase 1;Biotin carboxylase	Acaca
24.1204	24.2305	17.264	17.1826	17.1234	15.9393	+	78.119	22.925	0	2.22208	-7.64411	Q60953;D3Z3A6;D3YXR5;F7BTZ2;D3Z2V0;D6RII9	Q60953;D3Z3A6;D3YXR5;F7BTZ2	Protein PML	Pml
24.6192	24.4054	15.8297	16.5073	15.8361	18.1387	+	73.545	23.0747	0	1.64193	-7.52489	Q5SV02;P70388;E9PUJ2;A8Y5I3	Q5SV02;P70388;E9PUJ2;A8Y5I3	DNA repair protein RAD50	Rad50
23.9078	24.2686	17.2482	16.3437	17.7168	16.4238	+	49.579	22.6296	0	2.04459	-7.01793	E9QK89;Q5PSV9	E9QK89;Q5PSV9	Mediator of DNA damage checkpoint protein 1	Mdc1
21.6542	22.1504	17.3094	16.9104	16.2566	15.5981	+	9.7892	20.486	0	2.32538	-5.97491	G3UX50;Q3UKR0;O35613;G3UWI4;G3UWJ9	G3UX50;Q3UKR0;O35613;G3UWI4	Death domain-associated protein 6	Daxx
22.2438	22.0649	16.0985	16.4718	17.0961	15.4992	+	35.2	20.7048	0	1.73744	-5.85664	Q924W5;A0A1W2P6V7;A0A1W2P6F2;A0A1W2P6W0	Q924W5	Structural maintenance of chromosomes protein 6	Smc6
22.2133	22.149	17.4562	17.1184	17.5003	15.2513	+	6.03	20.7627	0	1.44906	-5.80535	F8WHY8;E9PX23;Q8K4B0;Q3U3A7;E9Q794;Q3UII8;Q924K8	F8WHY8;E9PX23;Q8K4B0	Metastasis-associated protein MTA1	Mta1
23.7769	22.536	18.5661	18.2026	19.11	15.6939	+	123.54	22.1434	0	1.06089	-5.75448	A0A286YDG5;Q8CG46	A0A286YDG5;Q8CG46	Structural maintenance of chromosomes protein 5	Smc5
24.5667	21.2501	17.32	17.8558	16.6002	18.0661	+	54.165	22.3342	0	1.03871	-5.57526	P97329	P97329	Kinesin-like protein KIF20A	Kif20a
21.9592	21.6936	14.961	16.307	16.6697	15.9944	+	4.8475	19.8744	0	2.3632	-5.49431	Q9CZ92	Q9CZ92	Centromere protein P	Cenpp
21.858	21.7583	16.3516	15.5055	16.5122	16.1884	+	5.7115	20.4725	0	3.01696	-5.45784	Q9QXK2;E9Q392;D3Z734;D3Z733;F6ZKR0;W4VSP9	Q9QXK2;E9Q392;D3Z734;D3Z733	E3 ubiquitin-protein ligase RAD18	Rad18
21.5264	21.7605	16.6752	15.3923	16.2086	16.2238	+	28.254	20.8482	0	3.33077	-5.42723	E9PUA5;Q9QWT9;G3UXN2;G3UX22	E9PUA5;Q9QWT9;G3UXN2	Kinesin-like protein;Kinesin-like protein KIFC1	Kifc5b;Kifc1
22.9215	22.7693	17.2908	16.4919	17.595	17.368	+	4.9442	21.5856	0	3.1884	-5.36393	E9Q577;A0A0R4J073;Q5U5Q9;A0A0R4J183;E9PWM5	E9Q577;A0A0R4J073;Q5U5Q9;A0A0R4J183;E9PWM5	BRCA1-A complex subunit RAP80	Uimc1
22.4616	22.5406	16.6805	15.8116	17.7287	16.5805	+	6.1936	22.3279	0	1.94359	-5.34653	Q9D0N7;D3YTP6;D3Z616	Q9D0N7	Chromatin assembly factor 1 subunit B	Chaf1b
21.4872	21.5788	17.4513	15.2624	16.0029	16.4112	+	10.421	20.2995	0	2.81247	-5.326	A0A1I7Q4G8;E9QMN5;Q8CHY6;A0A1D5RM07;A0A1D5RM58	A0A1I7Q4G8;E9QMN5;Q8CHY6	Transcriptional repressor p66 alpha	Gatad2a
21.7794	21.5939	17.0845	16.3669	16.4081	16.6039	+	7.9099	20.3701	0	3.1694	-5.18067	P27790	P27790	Major centromere autoantigen B	Cenpb
21.8148	21.5226	17.1157	15.9828	16.3757	16.9692	+	18.067	20.3448	0	2.36106	-4.99619	P43247;G3UXD8;G3UWZ8	P43247	DNA mismatch repair protein Msh2	Msh2
21.5344	21.7593	17.5555	16.2728	17.4996	16.2261	+	4.4351	20.3808	0	1.75	-4.78402	F6XU43	F6XU43		Zfp827
21.5419	21.4915	16.546	16.8484	16.9504	16.5151	+	18.57	20.054	0	2.67967	-4.78391	A2APB8	A2APB8	Targeting protein for Xklp2	Tpx2
21.5925	21.4253	17.6554	16.3312	17.3411	16.1772	+	12.89	19.3484	0	1.82453	-4.74975	P46737;A3KGA8;E9Q0P6	P46737;A3KGA8	Lys-63-specific deubiquitinase BRCC36	Brcc3
24.2386	23.0188	18.4729	17.9777	18.1614	19.5977	+	40.521	22.6696	0	1.42972	-4.7491	Q9Z277	Q9Z277	Tyrosine-protein kinase BAZ1B	Baz1b
25.0353	24.8557	16.0537	16.4716	20.2307	20.2401	+	207.15	23.7712	0	3.43877	-4.71013	E9QAS4;E9QAS5;Q6PDQ2;E9PYU4;E9PYL1;A2A8L1;F6WR45;F7C528;E9Q614;B1AR17;F6V4V3	E9QAS4;E9QAS5;Q6PDQ2	Chromodomain-helicase-DNA-binding protein 4	Chd4
22.552	22.2142	16.8942	16.2243	18.7214	16.8492	+	34.823	21.0203	0	1.3954	-4.59778	E9PVX6	E9PVX6		Mki67
20.8848	21.2937	16.9411	15.1865	16.7808	16.3125	+	16.827	19.5922	0	2.33264	-4.54258	Q8K298;A0A1L1SS34	Q8K298	Actin-binding protein anillin	Anln
21.3129	21.5999	17.0562	16.4174	16.9406	16.919	+	4.3714	20.4985	0	2.99602	-4.52659	A0A0R4J008;P70288;Q8BQ10	A0A0R4J008;P70288;Q8BQ10	Histone deacetylase 2	Hdac2
21.5649	21.435	17.1784	15.7057	16.9201	17.0395	+	62.671	20.7938	0	3.41931	-4.52014	Q8BPZ8	Q8BPZ8	BRCA1-A complex subunit Abraxas	Fam175a
21.5977	21.5633	17.3874	15.5535	17.7002	16.4345	+	2.2943	19.7215	0	1.71863	-4.51317	B8JK51;Q8K015	B8JK51;Q8K015	Centromere protein O	Cenpo
20.2222	19.9019	17.0374	16.0488	15.59	15.7084	+	2.712	19.054	0	2.82568	-4.41287	Q9R1T2	Q9R1T2	SUMO-activating enzyme subunit 1;SUMO-activating enzyme subunit 1, N-terminally processed	Sae1
21.0186	22.8742	20.2388	19.6169	16.2763	18.8064	+	19.39	21.7545	0	0.971103	-4.40508	P48754;A0A087WPK5	P48754	Breast cancer type 1 susceptibility protein homolog	Brca1
22.0345	22.0411	16.6122	15.2711	17.9351	17.394	+	29.621	20.464	0	2.41964	-4.37323	Q3TE40;Q62193	Q3TE40;Q62193	Replication protein A 32 kDa subunit	Rpa2
24.7007	24.0842	17.2053	16.7124	19.8748	20.185	+	25.642	23.3411	0	2.20769	-4.36255	O70126;P97477	O70126	Aurora kinase B	Aurkb
21.395	21.5825	17.3401	16.2249	16.8005	17.5926	+	55.613	20.2983	0	2.05189	-4.29221	P49452	P49452	Centromere protein C	Cenpc
21.3094	21.6709	16.7423	16.7019	18.136	16.3513	+	1.6436	20.1674	0.002445	1.36629	-4.24655	P63166;A0A087WRQ4	P63166;A0A087WRQ4	Small ubiquitin-related modifier 1	Sumo1
21.1269	21.1103	17.8786	15.3905	17.5449	16.2881	+	7.3714	19.6299	0	1.66464	-4.20209	Q9R207;A2AMG5	Q9R207;A2AMG5	Nibrin	Nbn
23.9375	24.1118	16.2747	17.1751	20.1405	19.5109	+	89.427	22.8321	0	2.22206	-4.199	G3X9W4;P49117;Q3ZAR9	G3X9W4;P49117;Q3ZAR9	Nuclear receptor subfamily 2 group C member 2	Nr2c2
25.9304	27.412	17.4137	19.3964	22.4581	22.5108	+	198.17	25.5851	0	1.52367	-4.18679	Q9WU62	Q9WU62	Inner centromere protein	Incenp
21.7617	22.8654	17.6616	16.07	17.6595	18.7345	+	23.118	21.3215	0	1.47783	-4.11654	Q6ZQF0;A0A087WS55;A0A087WPG9	Q6ZQF0	DNA topoisomerase 2-binding protein 1	Topbp1
21.0628	20.683	16.5257	16.2622	16.5263	17.0932	+	2.8766	19.3791	0	2.1563	-4.0631	Q9WUK4	Q9WUK4	Replication factor C subunit 2	Rfc2
19.7333	20.8291	18.4776	16.8677	15.9539	16.5037	+	2.6843	19.2705	0	1.65514	-4.05245	Q3UPE3	Q3UPE3	RecQ-mediated genome instability protein 2	Rmi2
21.5534	22.2938	17.7534	18.2112	17.0048	18.7663	+	33.711	21.4427	0	1.2867	-4.03806	P63168;Q80ZS7	P63168;Q80ZS7	Dynein light chain 1, cytoplasmic	Dynll1;BC048507
18.8651	21.3854	18.0401	16.112	16.8172	15.3672	+	19.303	20.0554	0	0.962204	-4.03305	Q60848;D3Z414	Q60848	Lymphocyte-specific helicase	Hells
19.2632	20.5563	17.1207	17.3923	15.5278	16.4051	+	17.811	20.5839	0	1.4308	-3.94332	Q9CQF3;A0A1D5RLS2;A0A1D5RM23	Q9CQF3;A0A1D5RLS2;A0A1D5RM23	Cleavage and polyadenylation specificity factor subunit 5	Nudt21
25.2398	25.2795	18.9586	19.5595	21.2127	21.4843	+	29.224	24.42	0	2.91032	-3.91112	Q61686;D3Z0U2	Q61686	Chromobox protein homolog 5	Cbx5
21.3651	20.8041	16.4848	17.2497	17.6065	16.7825	+	39.748	19.8415	0	1.79532	-3.89008	E9QPI5;Q6A026;A0A0J9YV33	E9QPI5;Q6A026	Sister chromatid cohesion protein PDS5 homolog A	Pds5a
20.9729	20.7887	17.0946	15.6883	17.3948	16.7631	+	11.644	19.3441	0	2.13043	-3.80183	G3X963;Q8CDM1	G3X963;Q8CDM1	ATPase family AAA domain-containing protein 2	Atad2
20.292	20.7416	16.7476	16.5493	16.7378	16.7629	+	18.927	19.194	0	2.44914	-3.76648	Q6PR54;A0A2I3BQ21;A0A2I3BRD9;A0A2I3BQI4	Q6PR54;A0A2I3BQ21;A0A2I3BRD9;A0A2I3BQI4	Telomere-associated protein RIF1	Rif1
26.3504	25.9213	20.9249	21.2864	22.4535	22.4553	+	224.65	24.9681	0	2.47112	-3.68143	P17918;A0A140T8V5	P17918;A0A140T8V5	Proliferating cell nuclear antigen	Pcna
23.1056	23.5312	18.1209	16.0637	19.6664	19.6741	+	139.14	22.5302	0	2.47011	-3.64818	P83917;Q7TPM0;Q9CYJ8	P83917;Q7TPM0;Q9CYJ8	Chromobox protein homolog 1	Cbx1
25.6797	25.6259	17.0962	15.8517	21.9417	22.1392	+	145.56	24.1928	0	3.09587	-3.6123	Q8BHX3;E9Q2C7	Q8BHX3	Borealin	Cdca8
22.5996	22.9345	17.5314	17.5816	19.4716	18.973	+	11.84	21.9371	0	2.14856	-3.54476	O09106	O09106	Histone deacetylase 1	Hdac1
19.705	20.0526	19.3915	16.9838	17.3776	15.4371	+	22.39	19.5086	0	1.14254	-3.47146	Q99LC5	Q99LC5	Electron transfer flavoprotein subunit alpha, mitochondrial	Etfa
20.3224	20.206	17.1886	16.4633	17.0958	16.7018	+	1.5584	19.0919	0.0031949	2.43126	-3.36537	Q924C1	Q924C1	Exportin-5	Xpo5
26.641	26.7882	22.0499	22.2723	23.1758	23.5262	+	172.29	26.1741	0	2.49793	-3.36358	Q9DCC5;P23198;D3Z1A9;D3Z313	Q9DCC5;P23198	Chromobox protein homolog 3	Cbx3
23.9477	23.0067	19.3231	19.706	20.1981	20.2484	+	168.21	22.7805	0	1.69189	-3.25397	Q5SWN2;Q8VEE4	Q5SWN2;Q8VEE4	Replication protein A 70 kDa DNA-binding subunit;Replication protein A 70 kDa DNA-binding subunit, N-terminally processed	Rpa1
24.9848	24.9972	19.0163	19.7529	21.7255	21.7971	+	229.41	24.0389	0	3.8985	-3.22968	Q9CW03	Q9CW03	Structural maintenance of chromosomes protein 3	Smc3
20.2337	18.1557	17.7386	16.1616	15.9156	16.0395	+	28.803	19.6066	0	1.04254	-3.21713	Q3U6F1;E9Q7W0;A0A0J9YTV5;P31266	Q3U6F1;E9Q7W0;A0A0J9YTV5;P31266	Recombining binding protein suppressor of hairless	Rbpj
24.7291	24.7961	18.9523	19.178	21.4052	21.7149	+	169.66	23.8358	0	2.61276	-3.20248	Q9CU62	Q9CU62	Structural maintenance of chromosomes protein 1A	Smc1a
20.2949	20.024	16.8619	17.3913	17.566	16.3857	+	2.9966	18.1302	0	1.46446	-3.18364	Q9D6T0;A0A1B0GT07;A0A1B0GS52;A0A1B0GS48;A0A1B0GSR8	Q9D6T0;A0A1B0GT07	Nitric oxide synthase-interacting protein	Nosip
21.8597	22.033	16.8872	16.1176	17.8429	19.6832	+	37.012	20.6278	0	1.12527	-3.18329	Q91WN1	Q91WN1	DnaJ homolog subfamily C member 9	Dnajc9
19.2515	18.3498	17.6321	16.5846	16.3349	14.9343	+	1.2077	17.6554	0.0095378	1.20232	-3.16606	Q9JIH2	Q9JIH2	Nuclear pore complex protein Nup50	Nup50
17.6461	19.3492	18.5766	17.2281	15.3746	15.3198	+	1.466	19.4562	0.0031177	1.18063	-3.15049	Q9Z1F9	Q9Z1F9	SUMO-activating enzyme subunit 2	Uba2
18.7248	20.6063	16.507	17.6602	16.5079	16.5264	+	5.8296	18.7621	0	1.10305	-3.14839	F8WHS8;Q3U556;G3UWE3;Q8C5D8;O88907	F8WHS8;Q3U556;G3UWE3;Q8C5D8;O88907	E3 SUMO-protein ligase PIAS2;E3 SUMO-protein ligase PIAS1	Pias2;Pias1
18.5201	18.8283	18.3602	16.4043	16.3044	14.7573	+	1.5539	16.5783	0.0031847	1.23973	-3.14332	Q9D1M4	Q9D1M4	Eukaryotic translation elongation factor 1 epsilon-1	Eef1e1
18.1526	19.2491	20.0916	19.9396	15.59	15.5831	+	38.732	21.4763	0	1.52839	-3.11426	Q9DBH5	Q9DBH5	Vesicular integral-membrane protein VIP36	Lman2
25.4912	25.4758	20.7778	20.351	22.3102	22.4822	+	259.29	24.4963	0	3.10745	-3.08732	Q01320	Q01320	DNA topoisomerase 2-alpha	Top2a
19.2126	18.6118	17.5356	17.3368	16.8406	14.9434	+	6.5544	17.4253	0	1.02889	-3.02013	F7CVW0;B2RRI2;Q689Z5;Q3TMM7;A0A1W2P6Y8;A0A0G2JGC7;A0A0G2JEM3;A0A1W2P7W8;Q7TNB8	F7CVW0;B2RRI2;Q689Z5;Q3TMM7;A0A1W2P6Y8;A0A0G2JGC7;A0A0G2JEM3;A0A1W2P7W8;Q7TNB8	Protein strawberry notch homolog 1;Protein strawberry notch homolog 2	Sbno1;Sbno2
26.5535	27.3515	21.8272	21.5962	24.0256	23.897	+	122.83	26.2172	0	1.75022	-2.99118	H7BWX9;D3Z794;P61957;G3UZX6	H7BWX9;D3Z794;P61957	Small ubiquitin-related modifier 2	Sumo2
24.8277	24.66	17.6689	16.6609	21.7519	21.8246	+	122.81	23.9667	0	3.02023	-2.95561	G5E8U2;Q505G8;F6ULU2;F6ZJ37;F6RU08	G5E8U2;Q505G8	Zinc finger protein 827	Zfp827;Znf827
20.2674	20.3834	16.9037	16.5396	17.5338	17.2168	+	5.213	19.232	0	2.48719	-2.95008	A2AFF6;O35638	A2AFF6;O35638	Cohesin subunit SA-2	Stag2
20.3656	20.1652	17.0338	17.167	17.6056	17.0695	+	1.6451	19.0439	0.002449	2.02598	-2.92783	A0A0J9YV56;E9Q0U3;D3Z7P0;Q8K3W0;E9Q8Q1	A0A0J9YV56;E9Q0U3;D3Z7P0;Q8K3W0;E9Q8Q1	BRCA1-A complex subunit BRE	Bre
26.7299	26.6217	16.612	17.5717	23.7972	23.7268	+	323.31	25.5668	0	3.30979	-2.91379	Q61687;F6RDB7;Q8C2S3;A0A0G2JFA5;Q3UY26;A0A0G2JFG6;A0A0G2JF42;A0A0G2JGH3;A6PWK7;A6PWK8;A0A0G2JED2;A6PWK9;Q3TA30;A0A0G2JF35;A0A0G2JFR8	Q61687	Transcriptional regulator ATRX	Atrx
24.4411	24.3927	16.324	16.318	21.4728	21.7987	+	72.975	23.5813	0	2.45707	-2.78117	Q9Z103	Q9Z103	Activity-dependent neuroprotector homeobox protein	Adnp
18.008	18.4348	18.6713	17.1662	15.738	15.1572	+	5.0966	18.8861	0	1.78346	-2.77382	Q91VE6;E0CXU3	Q91VE6;E0CXU3	MKI67 FHA domain-interacting nucleolar phosphoprotein	Nifk
22.2686	22.4535	19.1983	15.4988	19.3153	19.8804	+	10.107	21.5587	0	1.94398	-2.76323	G3UZ60;G3UWI9;G3UWX9;Q9Z172;G3UZA7	G3UZ60;G3UWI9;G3UWX9;Q9Z172;G3UZA7	Small ubiquitin-related modifier 3;Small ubiquitin-related modifier	Sumo3
29.2914	29.4515	26.2393	26.3599	26.7199	26.8029	+	132.75	29.2812	0	2.9237	-2.61006	P62983	P62983	Ubiquitin-40S ribosomal protein S27a;Ubiquitin;40S ribosomal protein S27a	Rps27a
18.1321	19.4746	17.9968	16.3224	16.0484	16.3486	+	16.715	20.1554	0	1.19935	-2.60483	Q9D084;A6PWQ1;A0A140T8U2;H3BKU9;A6PWQ2	Q9D084;A6PWQ1;A0A140T8U2	Centromere protein S	Apitd1
19.9851	19.5712	17.1219	16.7253	17.2753	17.0956	+	22.5	18.417	0	2.12578	-2.5927	Q8K1K4	Q8K1K4	Centromere protein I	Cenpi
19.8213	19.8478	17.1642	15.6907	17.7579	16.8059	+	8.7814	19.8624	0	1.48049	-2.55263	P26350;A0A087WP98;A0A087WPN6;A0A087WQN2	P26350;A0A087WP98;A0A087WPN6;A0A087WQN2	Prothymosin alpha;Prothymosin alpha, N-terminally processed;Thymosin alpha	Ptma
17.525	18.003	20.6183	20.4628	16.0684	14.456	+	2.324	21.6211	0	1.01395	-2.50177	P08122	P08122	Collagen alpha-2(IV) chain;Canstatin	Col4a2
17.9068	17.7188	16.4763	17.8924	15.5046	15.1183	+	24.801	18.7923	0	2.13716	-2.50137	A0A1W2P6L9;Q3UQ28	A0A1W2P6L9;Q3UQ28	Peroxidasin homolog	Pxdn
22.4466	22.5143	16.2398	16.3747	19.7881	20.1868	+	21.876	21.9986	0	2.18615	-2.49305	Q60973;A2AFI9;A2AFJ1;F6ZLC6;F6U539	Q60973;A2AFI9;A2AFJ1	Histone-binding protein RBBP7	Rbbp7
18.4544	19.827	17.6583	17.1693	16.4698	16.8581	+	4.0769	20.0474	0	1.13159	-2.47676	Q8JZK9;P54869	Q8JZK9;P54869	Hydroxymethylglutaryl-CoA synthase, cytoplasmic;Hydroxymethylglutaryl-CoA synthase, mitochondrial	Hmgcs1;Hmgcs2
23.3297	23.6686	19.993	20.0988	21.1115	20.9389	+	2.2786	23.1195	0	2.23229	-2.47394	E9PUM3;Q9WUB3;Q3UEJ6;Q8CI94;Q9ET01	E9PUM3;Q9WUB3	Alpha-1,4 glucan phosphorylase;Glycogen phosphorylase, muscle form	Pygm
17.6987	19.3607	18.3056	16.7474	16.093	16.0518	+	3.5154	20.0756	0	1.00916	-2.45731	Q9CXW3;A0A0A6YY29	Q9CXW3;A0A0A6YY29	Calcyclin-binding protein	Cacybp
18.5815	19.6809	16.6326	16.0561	17.1907	16.1637	+	1.2842	19.5753	0.0060015	1.08357	-2.45403	B0V2V6;B0V2V8;Q3UH70;Q8K2F0;Q9ESU6	B0V2V6;B0V2V8;Q3UH70;Q8K2F0;Q9ESU6	Bromodomain-containing protein 3;Bromodomain-containing protein 4	Brd4;Brd3
23.5084	23.956	16.215	16.5272	21.3864	21.2182	+	76.52	22.872	0	2.02046	-2.42989	A3KG93;Q6ZQ88;G8JL40;F6Z4I3;F6ZC60	A3KG93;Q6ZQ88;G8JL40;F6Z4I3	Lysine-specific histone demethylase 1A	Kdm1a
18.8639	18.2241	17.3967	20.3853	16.1394	16.0898	+	82.187	21.0515	0	1.76948	-2.42939	G3X909;G3UY21;A0A140T8T2;G3UYX7;Q9R1B9;G3UZ61;E9Q117;E9QAW9;E9Q2P0;Q80TR4	G3X909;G3UY21;A0A140T8T2;G3UYX7;Q9R1B9	Slit homolog 2 protein;Slit homolog 2 protein N-product;Slit homolog 2 protein C-product	Slit2
18.2547	19.2948	16.9905	17.4958	16.6051	16.1044	+	2.1982	18.7187	0	1.2803	-2.41999	P70202	P70202	Latexin	Lxn
19.1559	19.5828	16.6671	15.904	17.5402	16.4141	+	2.2168	17.8799	0	1.23723	-2.3922	B1AUX2;Q61191	B1AUX2;Q61191	Host cell factor 1;HCF N-terminal chain 1;HCF N-terminal chain 2;HCF N-terminal chain 3;HCF N-terminal chain 4;HCF N-terminal chain 5;HCF N-terminal chain 6;HCF C-terminal chain 1;HCF C-terminal chain 2;HCF C-terminal chain 3;HCF C-terminal chain 4;HCF C-terminal chain 5;HCF C-terminal chain 6	Hcfc1
18.3358	18.0417	14.9276	16.3575	15.3815	16.2578	+	3.3232	17.4013	0	1.4435	-2.36906	Q810A7	Q810A7	ATP-dependent RNA helicase DDX42	Ddx42
19.2269	19.3626	16.5837	16.7517	17.2218	16.6441	+	2.2643	17.8076	0	1.81191	-2.36184	E9Q5A3;Z4YJZ7;A0A0H2UH19;Q5DW34;A0A0A6YWA0	E9Q5A3;Z4YJZ7;A0A0H2UH19;Q5DW34;A0A0A6YWA0	Histone-lysine N-methyltransferase EHMT1	Ehmt1
23.3406	23.0626	19.6724	20.214	21.3189	20.3658	+	43.265	22.6724	0	1.38156	-2.35918	P13864;J3QNW0	P13864;J3QNW0	DNA (cytosine-5)-methyltransferase 1;DNA (cytosine-5)-methyltransferase	Dnmt1
24.4151	23.6357	19.6364	16.1705	21.7486	21.5882	+	203.07	23.2362	0	1.56332	-2.35693	Q6P5D8;A0A3B2W494	Q6P5D8	Structural maintenance of chromosomes flexible hinge domain-containing protein 1	Smchd1
18.3307	17.981	17.4643	15.9958	16.2387	15.4166	+	5.5059	15.1516	0	1.45715	-2.32818	D3Z0S6;Q62189	D3Z0S6;Q62189	U1 small nuclear ribonucleoprotein A	Snrpa
26.2408	26.3035	22.4382	22.3597	24.0436	23.9384	+	91.565	25.721	0	3.14289	-2.28113	Z4YKB8;Q3TEA8;Z4YKA3;A2AM65;A2AM63;A2AM69	Z4YKB8;Q3TEA8;Z4YKA3;A2AM65	Heterochromatin protein 1-binding protein 3	Hp1bp3
25.1395	25.5406	22.7241	22.6077	23.0614	23.1045	+	154.29	25.2071	0	2.10288	-2.25712	Q9QZQ8	Q9QZQ8	Core histone macro-H2A.1	H2afy
18.3775	18.8283	18.6396	15.3474	16.7758	15.9315	+	5.2236	15.6267	0	1.37254	-2.24931	V9GXM6;F6R587;B7ZCP4;Q8C166	V9GXM6;F6R587;B7ZCP4;Q8C166	Copine-1	Cpne1
19.8151	19.9131	17.7605	16.809	17.6149	17.6488	+	9.8542	19.336	0	3.26784	-2.23225	Q8R323	Q8R323	Replication factor C subunit 3	Rfc3
18.7548	18.0043	17.0822	16.283	16.5278	15.791	+	2.4912	15.8635	0	1.28588	-2.22016	Q78WZ7	Q78WZ7	DNA-directed RNA polymerase I subunit RPA43	Twistnb
18.8558	18.3026	16.3848	15.7333	16.3687	16.3765	+	1.1792	18.8319	0.0094821	1.81366	-2.20658	A0A087WRY3;Q80XU3	A0A087WRY3;Q80XU3	Nuclear ubiquitous casein and cyclin-dependent kinase substrate 1	Nucks1
18.881	18.4323	15.9397	17.4284	17.0979	15.8166	+	9.345	18.5851	0	1.07834	-2.19939	A0A0J9YUT8;Q8R3C6	A0A0J9YUT8;Q8R3C6	Probable RNA-binding protein 19	Rbm19
23.0437	22.7747	19.8826	16.8679	20.7758	20.6575	+	24.147	22.3925	0	2.35051	-2.19257	F8WHU5;Q4VA53	F8WHU5;Q4VA53	Sister chromatid cohesion protein PDS5 homolog B	Pds5b
25.4203	25.6891	22.3078	22.523	23.2316	23.4951	+	198.72	25.1347	0	2.13697	-2.19132	A2AW05;Q08943	A2AW05;Q08943	FACT complex subunit SSRP1	Ssrp1
18.9722	18.153	19.8421	19.8934	16.3936	16.3708	+	8.3298	22.112	0	1.47431	-2.18036	P34884	P34884	Macrophage migration inhibitory factor	Mif
24.5054	24.7185	22.5974	22.456	22.383	22.4936	+	292.57	24.5246	0	2.51755	-2.17367	Q99MN9;E9Q1J7;D3YZC1;A0A087WQV1	Q99MN9;E9Q1J7;D3YZC1	Propionyl-CoA carboxylase beta chain, mitochondrial	Pccb
24.59	24.6821	16.473	20.9195	22.1437	22.7913	+	15.262	24.2113	0	1.65758	-2.16858	Q60972	Q60972	Histone-binding protein RBBP4	Rbbp4
26.6999	26.5986	22.7905	22.701	24.5894	24.5453	+	323.31	26.0721	0	3.15301	-2.08186	Q62318	Q62318	Transcription intermediary factor 1-beta	Trim28
18.1517	17.1974	16.3216	15.6017	15.2601	15.9941	+	1.2345	16.1718	0.0088823	1.1156	-2.04749	Q9D3D9	Q9D3D9	ATP synthase subunit delta, mitochondrial	Atp5d
26.3121	26.218	23.0087	22.93	24.1557	24.2828	+	323.31	25.8198	0	2.82622	-2.04578	G3X956;Q920B9	G3X956;Q920B9	FACT complex subunit SPT16	Supt16;Supt16h
18.4821	18.313	17.2171	16.0889	15.7708	16.9651	+	1.4529	18.7086	0.0031056	1.10738	-2.02961	P35235	P35235	Tyrosine-protein phosphatase non-receptor type 11	Ptpn11
30.1397	30.3211	27.9579	28.0466	28.0912	28.3184	+	158.4	30.9547	0	2.29152	-2.0256	Q8CBB6;Q8CGP2;Q8CGP1;Q64475;P10853;Q6ZWY9;Q64525;Q64478;P10854;Q9D2U9;Q8CGP0;Q64524	Q8CBB6;Q8CGP2;Q8CGP1;Q64475;P10853;Q6ZWY9;Q64525;Q64478;P10854;Q9D2U9;Q8CGP0;Q64524	Histone H2B;Histone H2B type 1-P;Histone H2B type 1-K;Histone H2B type 1-B;Histone H2B type 1-F/J/L;Histone H2B type 1-C/E/G;Histone H2B type 2-B;Histone H2B type 1-H;Histone H2B type 1-M;Histone H2B type 3-A;Histone H2B type 3-B;Histone H2B type 2-E	Hist1h2br;Hist1h2bp;Hist1h2bk;Hist1h2bb;Hist1h2bf;Hist1h2bc;Hist2h2bb;Hist1h2bh;Hist1h2bm;Hist3h2ba;Hist3h2bb;Hist2h2be
22.2961	22.2952	17.2615	18.9987	20.4279	20.1538	+	38.774	21.8608	0	2.33335	-2.00482	Q9R190;H3BLE1	Q9R190	Metastasis-associated protein MTA2	Mta2
22.3174	22.1735	18.8181	19.0008	20.1615	20.3207	+	13.224	22.0822	0	2.54482	-2.00432	A0A140LHA2;Q9WVA3;A0A140LIM5;A0A140LJ21;A0A140LI47	A0A140LHA2;Q9WVA3;A0A140LIM5;A0A140LJ21	Mitotic checkpoint protein BUB3	Bub3
24.9251	24.887	21.8426	21.8325	22.9569	22.8677	+	131.93	24.5495	0	3.22825	-1.99378	Q91ZW3;Q6PGB8;F6Z6F4	Q91ZW3	SWI/SNF-related matrix-associated actin-dependent regulator of chromatin subfamily A member 5	Smarca5
18.1084	18.8181	16.9646	17.0089	16.2903	16.651	+	1.7714	16.4783	0.00083126	1.42399	-1.99254	A0A0U1RPJ7;D3YVR9;Q9R0P4	A0A0U1RPJ7;D3YVR9;Q9R0P4	Small acidic protein	1110004F10Rik;Smap
18.53	17.4583	17.9514	18.0604	15.7434	16.2786	+	1.2693	18.2677	0.0067214	1.09491	-1.98316	Q8BHY2	Q8BHY2	Nucleolar complex protein 4 homolog	Noc4l
18.4957	18.7816	16.2275	17.0924	16.7131	16.6267	+	14.192	17.1227	0	2.24352	-1.96875	E9PWW9;A0A0U1RPA7	E9PWW9;A0A0U1RPA7		Rsf1
22.0445	22.0526	20.2714	20.6014	20.0467	20.1388	+	51.026	22.5053	0	3.25316	-1.95579	Q8CDN6	Q8CDN6	Thioredoxin-like protein 1	Txnl1
