# Supplementary material for: TRF1 averts chromatin remodelling, recombination and replication dependent-break induced replication at mouse telomeres
Source: eLife. 2020 Jan 14;9:e49817. doi: 10.7554/eLife.49817 (PMC6986873; doi:10.7554/eLife.49817)
Supplement: Figure 2—source data 2. — Related to Figure 2B. [file elife-49817-fig2-data2.xlsx]

## Sheet: Figure 2B
	Quantification
		GFP	GFP	GFP	GFP	GFP	CRE	CRE	CRE	CRE	CRE
	TRF2	1	1	1	1		1.26	0.73	2.9	1.86
	TRF1	1	1	1			0.09	0.08	0.17
	BAZ1b	1	1	1			1.72	2.5	1.97
	p66a	1	1	1	1	1	1.33	1.2	4.4	1.89	1.27
	BRCA1	1	1	1	1		2.04	6	3.5	3.3
	MTA1	1	1	1			2.88	7.3	9.96
	ZNF827	1	1				1.89	1.78
	CHD4	1	1	1	1	1	1.43	1.7	3.332	1.73	1.8
