# Supplementary material for: TRF1 averts chromatin remodelling, recombination and replication dependent-break induced replication at mouse telomeres
Source: eLife. 2020 Jan 14;9:e49817. doi: 10.7554/eLife.49817 (PMC6986873; doi:10.7554/eLife.49817)
Supplement: Figure 2—source data 3. — Related to Figure 2C. [file elife-49817-fig2-data3.xlsx]

## Sheet: Figure 2C
	N. of co-localization PML-telomeres/total PML
	GFP	GFP	CRE	CRE
	0	0.11	0.2	0.23
	0	0.06	0.0666667	0.25
	0	0.08	0.357143	0.12
	0	0.11	0.4375	0.25
	0	0.15	0.368421	0.13
	0.333333	0	0.333333	0.43
	0.111111	0	0.206897	0.3
	0.153846	0.08	0.333333	0.29
	0.0555556	0.17	0.178571	0.4
	0	0.1	0.125	0.26
	0.1	0.06	0.181818	0.33
	0.0588235	0.04	0.5	0.06
	0.105263	0.04	0.307692	0.13
	0.133333	0.16	0.4	0.29
	0.0434783	0.3		0.13
	0	0.03		0.24
	0	0.05	0.5	0.2
	0	0.14		0.24
	0.0909091	0.18	0.333333	0.13
	0	0.1	0.142857	0
		0.13	0.181818	0.2
	0	0.13	0.285714	0.08
	0	0	0.2	0.13
	0	0.15	1	0.17
	0.333333	0.15	0.0294118	0.14
	0	0.14	0.28	0.15
	0.125	0.12	0.666667	0.28
	0.1	0.19	0.15	0.21
	0.0588235	0.09	0.6	0.3
	0.0833333	0.07	0.333333	0.29
	0.133333	0.12	1	0.3
	0.0714286	0.09	0.133333	0
	0.0526316	0.33	0.176471	0
	0.0909091	0	0.2	0.35
	0.25	0.21	0.166667	0.15
	0.222222	0.16	0.133333	0.37
	0	0.13	0	0.19
	0.210526	0.12	0.166667	0.13
	0.111111	0.17	0.125	0.13
	0.2	0.13	0.25	0.4
	0.25	0.06	0.181818	0.17
	0.214286	0.14	0.285714	0.2
	0.375	0.05	1	0.14
	0	0.07	0	0.36
	0	0	0.333333	0.6
	0	0.29	0.5	0.5
	0.3125	0.08	0	0.33
	0.222222	0.05	0	0.08
	0	0.1	0.375	0.13
	0.142857	0.13	0	0
	0.1875	0.07	0.142857	0.12
	0.0666667		0.0769231
	0.176471		0.157895
	0.0714286		0.5
	0.304348		0.428571
	0.105263		0.333333
	0.133333		0.0666667
	0.333333		0
	0.263158		0.166667
	0.05		0.277778
	0		0.176471
	0.181818		1
	0.25		0.142857
	0		0.28
	0.666667		0
	0		0
	0		0.333333
	0		0.363636
	0.142857		0.191489
	0.230769
	0.0588235		0.166667
	0.04		0
	0.0384615		0.2
	0.225806		0.545455
	0.0909091		0.6
	0.333333		0
	0.666667		0.261905
	0.25		0.5
	0.142857		0.307692
	0.4		0
	0.125		0.5
	0		1
	0
	0		0.176471
	0.0909091		0
	0.0909091		0.333333
	0.0588235		0
	0.1875
	0
	0.142857		0.125
	0.375		0.0833333
	0		0.428571
	0.1		0.0555556
	0		0
	0		0.2
	0.0833333		0.142857
	0.1		0.294118
	0		0.333333
	0.142857		0.1
	0.1		0.166667
	0.285714		0.0769231
	0.0454545		0.142857
	0.1		0.230769
	0.111111		0.4
	0.0833333		0.333333
	0.142857		0.111111
	0		0.375
	1		0.285714
	0.5		0
	0.0625		0.5
	0.125		0
	0.25		0.666667
	0.2		0.3
	0.125		0.2
	0		0.181818
	0.0833333		0.166667
	0		0
	0.1		0
	0.166667		0.1
	0		0
	0.142857		0.125
	0.142857		0.307692
	0.166667		0.25
	0.142857		0
	0.105263		0
	0.333333		0.142857
	0		0.666667
	0		0.0909091
	0		0.1
	0		0.192982
	0.5		0.209877
	0.25		0.333333
	0		0.2
	0		0.214286
	0		0.166667
	0.2		0.25
			0.181818
	0		0.25
			0.166667
	0		0.16
	0		0.153846
	0.111111		0.176471
	0		0
	0		0.181818
	0.1		0.5
	0.4		0.25
			0
	0		0.0416667
	0		0.25
	0		0.266667
	0		0.25
	0		0.363636
	0		0.315789
	0		0.166667
	0		0.384615
	0.1		0.4
	0.0769231		0.266667
	0.047619		0.5
	0		0
			0.285714
	0		0.222222
	0		0.2
			0.153846
	0		0.125
	0		0.4
	0.0882353		0.222222
	0.0612245		0.3
			0.1
			0
	0.142857		0.428571
	0.1		0.454545
	0		0.222222
	0		0
	0.1		0
	0		0.333333
	0		0.333333
	0		0.0833333
	0		0.416667
			0.125
			0.454545
	0		0.255319
	0		0.0869565
	0		0
	0		0.153846
	0		0.333333
	0		0
	0		0.5
	0		0.08
	0		0.272727
	0		0.1875
	0		0.333333
	0.0833333		0.285714
	0.375		0
	0		0.75
	0.333333		0.428571
	0.166667		0
	0		0.3125
			0.272727
	0.25		0.357143
	0.25		0
	0		0
	0.153846		0.0833333
	0		0.0714286
			0.0833333
			0
	0		0.0757576
	0		0.25
	0		0.2
	0		0.5
	0		0.5
	0		0
	0.142857		0.25
	0.2		0.2
	0.0588235		0
	0.0555556		0
	0.1875		0
	0.222222		0.125
	0.2		0.16
	0.25		0
	0.105263		0
	0		0.257143
	0.25		0.142857
	0.166667		0.25
	0		0.25
	0		0.285714
	0		0.3
	0		0.272727
	0		0.5
	0		0
	0		0.571429
	0		0.133333
	0.25		0.375
	0		0.333333
	0		0.0909091
	0		0.375
	0		0.222222
	0		0
			0.222222
	0		0
	0.2		0
	0		0
	0.0833333		0.15
	0		0.333333
	0.333333		0.6
	0.5		0.25
	0.5		0.5
	0		0
	0		0.375
	0		0.444444
			0.416667
	0		0.375
	0		0.166667
	0		0.375
	0		0.434783
	0		0
	0		0.125
	0		0.625
	0		0
	0.125		0.5
	0.5		0
	1		0
			0.411765
	0		0.25
	0.333333		0.153846
	1		0.5
	1		0.307692
	0		0.333333
	0.333333		0.4
	0		0.25
			0.384615
	0.333333		0.571429
	0.25		0.5
	0		0.416667
	0		0.257143
	0.125		0.333333
	0		0.375
	0		0.333333
	0.25		0.166667
	0.125		0
	0.1		0
	0.272727		0.5
	0.166667		0.111111
	0.166667		0.166667
	0		0.285714
	0.272727		0.0909091
	0		0
	0.333333		0.333333
	0.333333		0.2
	0.125		0.454545
	0		0
	0		0.166667
	0		0.0909091
	0		0.153846
	0.333333		0.0769231
	0.285714		0.5
			0.222222
	0		0.25
			0.0714286
	0		0.333333
	0.333333		0.333333
	0		0.666667
