# Supplementary material for: TRF1 averts chromatin remodelling, recombination and replication dependent-break induced replication at mouse telomeres
Source: eLife. 2020 Jan 14;9:e49817. doi: 10.7554/eLife.49817 (PMC6986873; doi:10.7554/eLife.49817)
Supplement: Figure 2—source data 4. — Related to Figure 2D. [file elife-49817-fig2-data4.xlsx]

## Sheet: Figure 2D-S3A-source data 7
all exchanges						double exchanges						single exchanges
GAPDH + GFP	GAPDH + Cre day 4	GAPDH + Cre day 7				GAPDH + GFP	GAPDH + Cre day 4	GAPDH + Cre day 7				GAPDH + GFP	GAPDH + Cre day 4	GAPDH + Cre day 7
0	1.59	3.61				0	0	1.81				0	1.59	1.81
0.72	1.96	2.78				0.72	0	1.39				0	1.96	1.39
0.83	4.12	1.68				0	2.06	0.84				0.83	2.06	0.84
0.79	0.78	2.38				0	0	0.95				0.79	0.78	1.43
0	0	2.82				0	0	0				0	0	2.82
0	1.22	2.53				0	0	0				0	1.22	2.53
0	0	4.11				0	0	2.05				0	0	2.05
0	1.12	4.29				0	0	0				0	1.12	4.29
0	3.23	3.25				0	1.61	0				0	1.61	3.25
0.43	3.75	3.53				0	0	0				0.43	3.75	3.53
0	1.46	2.3				0	0.73	0				0	0.73	2.3
2.8	1.32	1.92				1.87	0.33	0				0.93	0.99	1.92
0.36	0.8	1.41				0	0	0				0.36	0.8	1.41
0	1.79	5.26				0	0	1.75				0	1.79	3.51
0	0	5.77				0	0	1.92				0	0	3.85
0	1	5.06				0	0	2.53				0	1	2.53
1.65	4.92	0				0.83	0	0				0.83	4.92	0
0	0	1.76				0	0	0.88				0	0	0.88
0	2.88	1.9				0	0.96	0				0	1.92	1.9
0.56	3.03	5.75				0	0	3.45				0.56	3.03	2.3
0	2.53	3				0	1.27	0				0	1.27	3
0.75	2.22	4.45				0.75	0	1.21				0	2.22	3.24
0.87	0	0				0	0	0				0.87	0	0
0	0	1.64				0	0	1.64				0	0	0
0	1.87	4.07				0	0.93	2.44				0	0.93	1.63
0	7.69	1.54				0	5.13	0				0	2.56	1.54
0	0	0				0	0	0				0	0	0
0	0	1.72				0	0	0				0	0	1.72
0.99	0	3.64				0	0	3.64				0.99	0	0
0	0	0.97				0	0	0.97				0	0	0
