# Supplementary material for: TRF1 averts chromatin remodelling, recombination and replication dependent-break induced replication at mouse telomeres
Source: eLife. 2020 Jan 14;9:e49817. doi: 10.7554/eLife.49817 (PMC6986873; doi:10.7554/eLife.49817)
Supplement: Figure 3—figure supplement 1—source data 3. — Related to Figure 3—figure supplement 1C. [file elife-49817-fig3-figsupp1-data3.xlsx]

## Sheet: Figure 3S1C
	Primary TRF1 F/F (day 6)
	Relative TERRA signal
	GFP	GFP	GFP	GFP	GFP	CRE	CRE	CRE	CRE	CRE
	1	1	1	1	1	1.79	1.98	1.65	1.69	1.67
	SV40 TRF1 F/F (day 4)
	Relative TERRA signal
	GFP	GFP	GFP	GFP		CRE	CRE	CRE	CRE
	1	1	1	1		1.14015	1.1165	1.47137	1.53
