# Supplementary material for: TRF1 averts chromatin remodelling, recombination and replication dependent-break induced replication at mouse telomeres
Source: eLife. 2020 Jan 14;9:e49817. doi: 10.7554/eLife.49817 (PMC6986873; doi:10.7554/eLife.49817)
Supplement: Figure 3—figure supplement 1—source data 5. — Related to Figure 3—figure supplement 1E. [file elife-49817-fig3-figsupp1-data5.xlsx]

## Sheet: Figure 3S1E
	DMSO	Aph
	1	1.6
	1	2.1
	1	1.42
	1	1.34
