# Supplementary material for: TRF1 averts chromatin remodelling, recombination and replication dependent-break induced replication at mouse telomeres
Source: eLife. 2020 Jan 14;9:e49817. doi: 10.7554/eLife.49817 (PMC6986873; doi:10.7554/eLife.49817)
Supplement: Figure 3—figure supplement 2—source data 2. — Related to Figure 3—figure supplement 2B. [file elife-49817-fig3-figsupp2-data2.xlsx]

## Sheet: Figure 3S2B
		Relative telomerase activity
		MEF GFP	MEF CRE
		10.4636	19.6471
		15.3783	18.6246
		14.0188	12.7148
		16.4783	17.1828
