# Supplementary material for: TRF1 averts chromatin remodelling, recombination and replication dependent-break induced replication at mouse telomeres
Source: eLife. 2020 Jan 14;9:e49817. doi: 10.7554/eLife.49817 (PMC6986873; doi:10.7554/eLife.49817)
Supplement: Figure 3—figure supplement 2—source data 3. — Related to Figure 3—figure supplement 2C. [file elife-49817-fig3-figsupp2-data3.xlsx]

## Sheet: Figure 3S2C
								quantification
								wt	1
								Aph	3.1764
								TRF1	0.826716
								U2OS	50.2269
