# Supplementary material for: TRF1 averts chromatin remodelling, recombination and replication dependent-break induced replication at mouse telomeres
Source: eLife. 2020 Jan 14;9:e49817. doi: 10.7554/eLife.49817 (PMC6986873; doi:10.7554/eLife.49817)
Supplement: Figure 3—source data 1. — Related to Figure 3A. [file elife-49817-fig3-data1.xlsx]

## Sheet: Figure 3A
	Quantification
	GAPDH + GFP	GAPDH + GFP	GAPDH + GFP	GAPDH + CRE	GAPDH + CRE	GAPDH + CRE
	1	1	1	2.3902	2.57169	2.44809
