# Supplementary material for: TRF1 averts chromatin remodelling, recombination and replication dependent-break induced replication at mouse telomeres
Source: eLife. 2020 Jan 14;9:e49817. doi: 10.7554/eLife.49817 (PMC6986873; doi:10.7554/eLife.49817)
Supplement: Figure 3—source data 2. — Related to Figure 3B. [file elife-49817-fig3-data2.xlsx]

## Sheet: Figure 3B
		quantification realtive to 28s RNA
		GFP		CRE
		1	1	2.39	2.6
