# Supplementary material for: TRF1 averts chromatin remodelling, recombination and replication dependent-break induced replication at mouse telomeres
Source: eLife. 2020 Jan 14;9:e49817. doi: 10.7554/eLife.49817 (PMC6986873; doi:10.7554/eLife.49817)
Supplement: Figure 3—source data 3. — Related to Figure 3C. [file elife-49817-fig3-data3.xlsx]

## Sheet: Figure 3C 
	N. of TERRA foci					TERRA intensity
	GFP	CRE				GFP	CRE
	5	11				5.35489	11.6229
	6	37				3.35588	7.85427
	13	22				5.99127	15.7428
	10	14				5.52659
	9	12				6.36627	6.59134
	6	19				4.28402	7.56946
	9	77				4.64619	7.69899
	7	18				4.76124	6.30836
	3	36				5.18165	7.12133
	19	43				5.49127	7.62294
	8	59				7.01466	18.8213
	8	31				5.76533	8.33836
	11	47				7.47007	5.31756
	32	26				5.3983	8.49956
	2					8.15901	6.40312
	1	47				6.2018	4.81656
	1	51				8.55164	7.69722
	14	34				5.02228	5.02762
	5	29				4.55089	7.90712
	6	30				6.04478	5.71569
	2	41				9.04965	5.33813
	17	32				11.0519	6.85505
	6	21				5.77451	5.86674
	3	51				4.04619	5.62953
	3	26				5.14309	5.5404
	4	34				8.42015	5.47987
	8	79				3.85245	11.4498
	1	28				4.41686	3.71036
	11	70				8.3177	6.46
	14	32				8.43525	5.84419
	23	31				6.48265	5.17121
	16	38				5.47054	7.96155
	19	51				4.12726	7.68685
	4	36				5.88598	5.29416
	6	46				6.59917	6.48716
	6	41				5.09698	7.40534
	5	17				5.73114	4.70338
	5	17				7.72027	5.11152
	14	52				18.3069	6.30536
	11	18				5.02904	7.70951
	11	15				3.87644	5.55177
	4	33				7.32353	7.60375
	16	49				11.4889	7.05308
	17	37				7.72791	6.09789
	36	28				9.4751	7.33535
	26	21				9.25764	7.59312
	34	25				5.78801	30.5353
	9	60				3.53763	5.46775
	19	31				5.68114	4.12502
	49	46				8.98917	7.9513
	42	70				9.25845	7.97601
	46	64				9.51168	6.41945
	26	74				7.18943	7.27535
	21	72				7.67034	4.52103
	12	53				6.91509	4.66972
	13	30				4.7441	6.90375
	30	39				8.91281	5.53361
	20	42				8.13484	5.80697
	17	32				6.42333	6.25749
	26	35				8.90372	6.04934
	15	33				6.04084	15.4375
	17	39				9.19527	5.31617
	31	67				8.83289	7.50594
	8	18				5.16076	5.32814
	6	49				5.60987	6.17235
	28	41				6.66185	4.58895
	39	60				6.56503	6.5227
	19	55				6.75398	4.71764
	25	59				6.84981	7.93041
	12	57				8.33688	5.69362
	14	29				6.7918	5.29965
	18	38				9.01797	8.91982
	11	22				5.1235	8.17333
	8	32				5.4635	6.0498
	14	41				8.90165	22.5576
	3	40				6.7816	7.40094
	17	16				8.64706	10.0024
	10	37				5.51591	5.70043
	14	20				4.98258	12.0318
	40	38				6.5729	7.51237
	32	26				8.39917	25.4335
	15	11				6.97618	5.98414
	3	11				5.36026	3.85301
	20	65				7.39516	7.3206
	9	47				5.12909	12.1912
	29	6				9.49576	4.99454
	17	14				5.45431	6.88197
	15	70				4.64495	5.74334
	11	9				6.94694	6.15174
	10	12				9.1919	5.62824
	31	15				7.06174	4.78279
	23	13				10.485	4.65636
	13	13				8.59699	5.44843
	12	14				6.20112	4.05275
	6	23				5.87202	5.23997
	4	26				11.5134	6.2522
	61	59				8.20743	18.3054
	16	18				7.99362	6.18107
	17	49				6.81683	5.8559
	12	72				9.14859	7.88925
	12	25				8.72921	8.18209
	3					2.9709	7.10594
	9	37				8.0588	9.62074
	6	37				7.77714	23.4989
	29	39				6.57399	6.64661
	2	31				8.84197	4.33582
	33	66				6.72845	6.17694
	34	7				9.01556	4.33403
	24	11				7.04026	4.23332
	6	16				5.29709	5.74645
	10	10				8.32275	4.60845
	5	13				12.9841	6.69515
	13	42				7.78295	8.34161
	3	21				3.16298	5.67263
	4	14				3.70402	6.07848
	14	38				6.45732	6.02656
	4	29				5.45001	5.36022
	6	21				8.27361	6.8714
	10	33				4.70539	6.02943
	4	37				6.34641	7.11225
	31	76				5.39383	14.7937
	3	11				2.84147	4.41542
	17	20				5.25399	5.15542
	5	8				6.20653	6.28602
	7	24				4.02113	6.50402
	9	84				6.01626	7.24971
	45	13				7.40807	3.7822
	11	83				7.33573	7.69153
	46	9				7.43243	6.83184
	15	19				5.59964	5.98667
	34	40				9.64498	18.631
	15	13				6.59465	5.91157
	11	21				8.63662	11.6493
	18	16				7.88352	17.1094
	23	15				7.35727	4.12481
	13	18				5.92342	6.51497
	17	19				10.7327	4.32021
	16	81				7.5067	5.86129
	42	54				8.49874	6.64465
	45	26				8.63809	4.5075
	10	80				9.32817	4.85308
	9	25				8.17178	4.974
	13	21				8.27161	4.53536
	55	16				8.84694	4.63111
	10	25				8.57443	6.80495
	33	52				8.33864	5.55704
	40	14				7.17758	3.51234
	4	32				5.99465	6.23576
	19	34				8.39452	12.5263
	8	36				13.9043	7.41419
	13	32				9.1932	5.95255
	19	36				8.39962	7.29277
	13	15				6.02194	3.99917
	37	41				10.2332	6.66593
	19	37				7.05956	7.06678
	23	39				4.17183	4.80967
	31	10				4.69354	5.89425
	45	26				5.29203	5.15441
	22	25				6.06267	6.1109
	37	10				4.72786	4.47025
	36	31				4.91172	6.09938
	72	55				5.43113	8.5324
	26	36				5.33959	16.004
	42	22				3.54798	9.92418
	32	17				7.44915	13.5466
	5	22				4.12836	8.43524
	13	17				4.32199	7.95018
	40	12				4.775	5.30741
	7	76				2.98117	9.24679
	8	69				2.89447	8.27706
	12	19				4.83948	8.76104
	6	66				5.58352	24.8115
	11	26				5.16441	7.60202
	11	38				4.58003	6.12251
	9	36				4.13729	34.3411
	8	46				3.44055	9.7455
	9	23				4.24591	5.55015
	45	27				4.79864	6.33303
	33	24				5.49444	5.39674
	7	11				5.92188	4.82385
	36	15				5.04117	5.07992
	13	65				6.40603	9.05715
	13	11				4.28633	4.86278
	29	41				4.87931	6.58061
	9	41				3.48167	5.82144
	8	34				4.95702	6.51798
	31	7				4.19688	6.65872
	6	14				3.75481	5.31761
	8	16				4.62404	4.78529
	16	32				7.10947	6.13719
	9	54				3.1801	7.63031
	31	34				5.00008	7.31936
	23	50				4.65188	6.73094
	13	15				5.3818	4.59719
	13					3.99941	5.83485
	17	56				5.14022	14.8907
	28	73				4.27221	7.11004
	73	46				5.29621	6.22259
	20	23				4.77464	5.14961
	36	43				5.26386	7.25055
	12	21				5.51704	8.06843
	13	29				2.66482	5.42192
	6	11				4.00298	8.51906
	15	18				5.14929	8.3574
	18	36				5.09474	6.88766
	16	18				5.91244	6.59321
	13	8				4.41403	4.81501
	43	53				4.56859	31.5434
	17	37				4.72413	7.24846
	33	49				4.37806	8.21697
	29	18				4.41911	6.65073
	5	69				6.44251	8.76051
	35	19				4.0686	7.08093
	23	16				5.11807	4.68623
	20	39				5.62477	10.0883
	62	60				7.06637	9.1965
	12	15				3.61596	7.63529
	13	25				2.87141	5.68853
	22	17				4.37267	7.46889
	30	30				3.37573	12.1318
	22	35				4.075	6.51722
	35	85				3.79814	19.1621
	52	46				4.97965	5.71389
	23	44				3.79817	6.0449
	19	14				4.46987	5.59205
	39	22				4.81289	5.27179
	40	45				6.22074	7.63494
	48	21				3.6967	7.18127
	17	80				3.42111	5.87053
	40	18				4.67937	6.85437
	16	30				3.41713	8.47515
	17					5.14816	9.32625
	71	22				5.99041	6.75168
	16	38				4.74918	8.13149
	26	29				4.77827	11.7136
	9	47				2.94999	14.0308
	10	22				5.60331	6.79397
	26	71				5.59535	12.1997
	16	69				3.78948	5.73324
	27	34				4.65427	5.01575
	12	31				3.91677	5.96268
	38	46				5.231	4.83033
	24	20				4.52574	7.32628
	21	21				7.45111	7.59943
	23	20				7.28795	6.75527
	19	37				6.99402	12.4148
	24	37				8.13634	3.63933
	23	8				8.08841	2.90344
	21	12				7.08465	5.62986
	25	38				8.16145	4.55466
	24	16				9.13241	4.03789
	42	25				10.7857	3.98615
	44	25				9.70878	4.50882
	43	21				6.75706	3.84133
	32	62				7.18303	5.92308
	40	47				8.53853	4.95431
	13					5.84172
	13					10.0154
	18					5.77591
	40					8.82078
	8					4.37512
	7					6.47881
	11					6.19088
	16					11.3388
	57					12.642
	19					11.9738
	24					13.3836
	21					10.903
	17					12.3554
	9					8.98101
	9					9.62841
	9					10.7941
	14					8.01064
	35					7.71401
	9					7.91345
	13					7.21188
	22					15.8653
