# Supplementary material for: TRF1 averts chromatin remodelling, recombination and replication dependent-break induced replication at mouse telomeres
Source: eLife. 2020 Jan 14;9:e49817. doi: 10.7554/eLife.49817 (PMC6986873; doi:10.7554/eLife.49817)
Supplement: Figure 4—figure supplement 1—source data 1. — Related to Figure 4—figure supplement 1A. [file elife-49817-fig4-figsupp1-data1.xlsx]

## Sheet: Figure 4S1A
						si ctr	siTRF1
						1	1.24
						1	1.1
