# Supplementary material for: TRF1 averts chromatin remodelling, recombination and replication dependent-break induced replication at mouse telomeres
Source: eLife. 2020 Jan 14;9:e49817. doi: 10.7554/eLife.49817 (PMC6986873; doi:10.7554/eLife.49817)
Supplement: Figure 4—figure supplement 1—source data 2. — Related to Figure 4—figure supplement 1B. [file elife-49817-fig4-figsupp1-data2.xlsx]

## Sheet: Figure 4S1B
		western blot HeLa					RNA dot blot Hela
												Quantification RNA dot blot
												minus Dox	plus Dox
												1	0.86
												1	0.98
