# Supplementary material for: TRF1 averts chromatin remodelling, recombination and replication dependent-break induced replication at mouse telomeres
Source: eLife. 2020 Jan 14;9:e49817. doi: 10.7554/eLife.49817 (PMC6986873; doi:10.7554/eLife.49817)
Supplement: Figure 4—source data 2. — Related to Figure 4B. [file elife-49817-fig4-data2.xlsx]

## Sheet: Figure 4B
	N. of co-localizing PML-telomeres/total PML
	siCtr	siTRF1
	0.25	0.42
	0.1	0.35
	0.05	0.46
	0.25	0.15
	0.09	0.17
	0.08	0.2
	0.27	0.2
	0.2	0.33
	0.14	0.22
	0.2	0.24
	0.29	0.24
	0.25	0.7
	0.21	0.23
	0.14	0.16
	0.14	0.14
	0.29	0.22
	0.21	0.63
	0.2	0
	0.26	0
	0.8	0.09
	0.17	0.1
	0.17	0.26
	0.17	0.18
	0.14	0.06
	0.08	0.15
	0.29	0.18
	0.33	0.07
	0.25	1
	0.3	0.4
	0.12	0.27
	0.15	0
	0.14	0.25
	0.05	0.46
	0.2	0.31
	0.27	0.09
	0.19	0.4
	0.2	0.13
	0.13	0.31
	0.27	0.17
	0.16	0.24
	0.23	0.21
	0.33	0.32
	0.21	0.13
	0.09	0.36
	0.22	0.07
	0.19	0.63
	0.13	0.25
	0.07	0.17
	0.29	0.23
	0	0
	0.32	0.44
	0.13	0.15
	0	0
	0	0.5
	0.36	0.2
	0.33	0.3
	0.67	0.3
	0.09	0.67
	0.21	0.04
	0.32	0.18
	0.2	0.13
	0	0.63
	0.39	0.18
	0.2	0.24
	0	0.11
	0.13	0.27
	0.2	0.45
	0.44	0.33
	0.23	0.26
	0.2	0.33
	0.27	0.13
	0.33	0.36
	0	0.18
	0.53	0.09
	0.14	0.13
	0.11	0.38
	0.22	0.1
	0.31	0.15
	0	0.35
	0.27	0.7
	0	0.13
	0.32	0.38
	0.31	0
	0.11	0.09
	0.29	0
	0.09	0.23
	0.18	0.26
	0.22	0.14
	0.27	0.21
	0.13	0.28
	0.43	0.03
	0.13	0.36
	0.29	0.15
	0.22	0.37
	0.21	0.33
	0.29	0.33
	0.44	0.7
	0.13	0.19
	0.25	0.21
	0.38	0.19
	0.29	0.13
	0.16	0.37
	0.18	0.37
	0.44	0.67
	0.44	0.25
	0.07	0.22
	0.14	0.26
	0.3	0.31
	0.17	0.14
	0.38	0.25
	0.28	0
	0.4	0.33
	0.11	0.38
	0.37	0.25
	0.6	0.29
	0	0.27
	0.18	0
	0.23	0.29
	0.27	0.5
	0.33	0
	0.06	0.38
	0.12	0.22
	0.13	0
	0.33	0.13
	0.33	0.15
	0.14	0.5
	0.25	0.5
	0.25	0.21
	0.25	0
	0	0.14
	0.16	0.12
	0.35	0.1
	0.11	0.09
	0.24	0.31
	0.11	0.24
	0.38	0.35
	0	0.17
	0.44	0.14
	0.23	0.4
	0.19	0.31
	0.24	0.33
	0.35	0.06
	0.16	0.38
	0	0.23
	0.38	0.29
	0.18	0.1
	0.17	0.44
	0.13	0.4
	0.23	0.28
	0.33	0.33
	0.09
