# Supplementary material for: TRF1 averts chromatin remodelling, recombination and replication dependent-break induced replication at mouse telomeres
Source: eLife. 2020 Jan 14;9:e49817. doi: 10.7554/eLife.49817 (PMC6986873; doi:10.7554/eLife.49817)
Supplement: Figure 4—source data 3. — Related to Figure 4C. [file elife-49817-fig4-data3.xlsx]

## Sheet: Figure 4C
	double				single
	sictr	siTRF1			sictr	siTRF1
	0	0			0	2.73
	1.2	0			0	1.59
	0	0			0	2.02
	0	0			1.35	3.33
	0	0			1.25	1.25
	0	0			0	3.23
	0	0			2.02	3.57
	0	0			0.86	0
	0	0			1.2	3.96
	0	0			0.63	1.79
	1.4	0			0	1.45
	0	0			2.99	1.47
	0	3.4			1.22	1.72
	0	0			1.98	2.99
	0	0			0	1.72
	0	1.6			2.19	0
	0	0			1.84	1.69
		0				2.25
		2				4.08
		0				4.84
