# Supplementary material for: TRF1 averts chromatin remodelling, recombination and replication dependent-break induced replication at mouse telomeres
Source: eLife. 2020 Jan 14;9:e49817. doi: 10.7554/eLife.49817 (PMC6986873; doi:10.7554/eLife.49817)
Supplement: Figure 5—source data 1. — Related to Figure 5C. [file elife-49817-fig5-data1.xlsx]

## Sheet: Figure 5C_
GAPDH+GFP condition								GAPDH+CRE condition
Total N of cells	S-phase	non S-phase	N cells co-localization BrdU-TRF2	N foci co-localizing	>= 5 FOCI CO-LOCALIZING			Total N of cells	S-phase	non S-phase	N cells co-localization BrdU-TRF2	N foci co-localizing	>= 5 FOCI CO-LOCALIZING
10	3	7	4	2				4	0	4	4		7
				2									5
				1								4
				1								3
16	6	10	3	1				5	1	4	2	3
				2								2
				2				12	10	2	1	2
10	3	7	5	1				7	3	4	2	2	5
				2				5	2	3	3		7
				3									10
				3								4
				2				8	3	5	5		7
7	1	6	3	2									6
				1									6
				2								2
10	3	7	3	1								2
				4				3	1	2	1	4
				3				3	1	2	2	1
18	9	9	4	2								2
				2				3	1	2	1	4
					6			10	2	8	2	3
				1								3
16	4	12	8	4				3	1	2	2	3
				2									10
				2				2	0	2	2		7
				3									6
				1				4	0	4	4		5
				2								4
				2								3
				1								3
14	7	7	5	3				2	0	2	2		6
				1									5
				1				1	0	1	1		7
				4				9	2	7	7		7
				3								3
5	1	4	3	4								4
				1								2
				2									6
6	3	3	1	1								4
23	7	16	5	1								3
				1				7	1	6	6	3
				1								2
				3									6
				1								2
9	3	6	3	3								1
					5								5
				2				4	2	2	2	2
6	1	5	5	2									5
				4				10	6	4	4	1
					6								8
				1								1
				1								2
7	1	6	5	4				13	6	7	4		6
				2								4
				4								1
				3								2
				2				14	7	7	0
157	52	105	57	54	3			8	5	3	1	1
				0.514286	0.0285714			3	1	2	1	2
								4	1	3	1	3
								6	3	3	2		5
												1
								6	2	4	1	1
								8	4	4	1	4
								7	1	6	5	2
												3
													5
												3
												3
								171	66	105	69	45	24
												0.428571	0.228571
