# Supplementary material for: TRF1 averts chromatin remodelling, recombination and replication dependent-break induced replication at mouse telomeres
Source: eLife. 2020 Jan 14;9:e49817. doi: 10.7554/eLife.49817 (PMC6986873; doi:10.7554/eLife.49817)
Supplement: Figure 5—source data 2. — Related to Figure 5D and F. [file elife-49817-fig5-data2.xlsx]

## Sheet: Figure 5D-5F_
Figure 3D
	GAPDH+GFP	GAPDH+GFP	GAPDH+CRE	GAPDH+CRE
Mitotic DNA synthesis (Non-telomeric)	1	1	1.05	0.9
Telomeric mitotic DNA synthesis	1	1	1.66	1.73
experiment1												experiment1												experiment2
GAPDH+GFP													GAPDH+CRE											GAPDH+CRE
	picture n.	n. chromosome	co-loc telo-with EdU single	co-loc telo-with EdU double	internal single EdU	internal double EdU	signal at the end, but telo missing	complex					picture n.	n. chromosome	co-loc telo-with EdU single	co-loc telo-with EdU double	internal single EdU	internal double EdU	signal at the end, but telo missing	complex				n. picture	n. chromosome	co-loc telo-with EdU single	co-loc telo-with EdU double	internal single EdU	internal double EdU	signal at the end, but telo missing	complex
1	2542	72	0	0	6	0	0	0				1	2269	235	1	0	0	0	0				1	2822	121	0	1	0	0	0	0		0
2	2543	212	5	1	7	4	0	0				2	2270	42	0	0	0	0	0				2	2823	132	1 +1 telo very short	0	2	1	0	0		2
3	2544	137	1	0	0	0	0	0				3	2271	110	0	0	0	0	0				3	2824	85	1	0	5	4	1	0		1
4	2545	59	1	0	4	0	1(single)	0				4	2272	142	0	0	0	0	0				4	2825	62	0	0	3	0	0	0		0
5	2546	63	0	0	1	0	0	0				5	2273	65	0	0	1	0	1(single)				5	2826	65	0	0	3	1	1 (double)+1 (single)			0
6	2547	59	0	0	0	0	0	0				6	2274	287	1	0	3	2	2(single)				6	2827	141	1	0	2	0	0	0		1
7	2548	69	0	0	0	0	0	0				7	2275	132	1	0	0	0	0				7	2829	129	1	0	0	0	0	0		1
8	2549	124	1(fused)	0	6	0	0	0				8	2276	278	2(1 fused between chr)	0	1	0	0				8	2831	60	0	0	4		1 (single)	0		0
9	2550	104	2	0	1	1	2(double)+1 (single)	0				9	2277	62	0	0	2	0	0				9	2832	110	0	0	1	0	0	0		0
10	2551	72	0	0	1	0	0	0				10	2278	187	0	0	1	0	0				10	2833	130	2+1 )	0	7	1	1(single)	0		3
11	2552	68	1	0	0	0	0	0				11	2279	70	0	0	0	0	0				11	2834	112	0	0	4	1	2 (single)+1 (double)			0
12	2553	151	0	0	0	0	0	0				12	2280	123	1	0	1	0	0				12	2835	66	1	0	0	0	0	1 (broken chr)		1
13	2554	137	1	0	1	0	1(single)	1 (internal)				13	2281	131	0	1	2	0	0				13	2836	69	1	0	*3	2	0		*1 between the 2 telomeres, not co-localizing	1
14	2555	199	1	0	2	0	2(double)+1 (single)	0				14	2282	59	1	0	0	1	0				14	2837	148	4 (very nice) +1 (very close)+1 (fused sister telo)	0	2		1 (single)			6
15	2556	111	1	0	7	0	1 (double)	0				15	2283	72	1	0	0	0	2 (double)	1			15	2839	68	0	0	0	0	0	0		0
16	2557	130	0	0	7	0	1 (single)	0				16	2284	113	0	0	2	0	0				16	2840	64	1 nice +1	0	3	1	1 (single)	0		2
17	2558	120	1	0	3	2	0	0				17	2285	132	0	0	1	0	0				17	2841	66	0	0	1	0	0	0		0
18	2559	64	0	0	0	0	0	0				18	2286	129	0	0	9	18	0	3			18	2842	126	2 (1 fragile)	1	2		3(single)	1		2
19	2560	105	0	0	0	0	0	0				19	2287	134	4 (1 fused;1 fragile)	0	4	2	0				19	2843	130	2	0	9	0	0	0		2
20	2561	71	0	0	1	0	0	0				20	2288	119	4 (2 fused)	1(1telo missing)	4	1	4 (single)				20	2844	66	0	1 (telo fusing)	3	10	0	4		0
21	2562	61	0	0	3	1	0	0				21	2290	69	2 (1 fused)	0	2	1	3 (single) +1 (double)				21	2846	130	1	0	4	5	1 (single)+1 (double)	2		1
22	2563	242	1 (2 dots Edu 1 not co-loc)	0	2	1	0	0				22	2291	64	0	0	0	0	0				22	2847	68	0	0	1	0	0	0		0
23	2564	70	0	0	0	0	0	0				23	2292	116	0	0	0	0	0				23	2848	129	1	2	4		2 (single)			1
24	2565	70	1	0	0	0	2(single)	0				24	2293	66	0	0	2	0	0				24	2849	132	1+1	0	5	0	1 (single)	0		2
25	2566	192	0	0	6	1	1(double)	0				25	2294	80	0	0	0	0	0				25	2850	129	0	0	0	0	0	0		0
26	2567	65	1	1	3	0	0	0				26	2295	121	0	0	3	0	0				26	2851	130	0	0	1	0	0	0		0
27	2568	72	0	1	2	0	1(single)	0				27	2296	258	0	0	1	0	0				27	2854	67	2 (very nice)+1 (sister fus.)	0	3	0	0	0		3
28	2569	117	1	0	2	0	1(double)+1 (single)	0				28	2297	134	0	0	0	0	1(single)				28	2855	124	3+ 1	0	7	0	0	0		4
29	2570	133	0	0	4	1	0	0				29	2298	127	0	0	0	0	0				29	2856	69	1		3	1				1
30	2571	139	0	0	1	0	0	0				30	2299	63	1	0	2	2	0	1			30	2857	129	0	0	3	0	0	0		0
31	2572	70	0	0	0	0	0	0				31	2300	62	2	0	16	3	1	2 (1at telo)			31	2858	138	0	0	2		2 (single)	0		0
32	2573	69	0	0	5	1	0	0				32	2301	126	1(fused)	0	0	0	0	1			32	2859	63	1	0	1	0	0	0		0
33	2574	70	1	0	0	1	0	0				33	2302	58	2 (fused)	0	0	9	1	4			33	2860	129	1	0	1	0	0	0		1
34	2575	67	0	0	4	1	0	0				34	2303	124	5	0	4	3	4(single)				34	2861	134	0	1 (1 colo-1 empty)	2	10	1 (single)	0		0
35	2576	203	2	0	5	2	1(single)	0				35	2304	109	0	0	1	0	0				35	2863	125	0	0	0	0	0	0		0
36	2577	76	0	0	4	0	0	0				36	2305	115	2	0	5	0	1(single)				36	2864	65	0	0	0	0	0	0		0
37	2578	143	0	0	2	0	0	1				37	2306	134	2	0	3	1	0				37	2865	125	0	0	0	1	0	0	0	0
38	2579	65	0	0	3	1	0	0				38	2307	131	3	0	12	2	0	1			38	2866	130	2	1	2	3	0	0		0
39	2580	57	0	0	0	0	0	0				39	2308	49	1(fused)	1	3	0	0				39	2867	69	1	0	1	8	0	0		2
40	2581	62	0	0	0	0	0	0				40	2309	132	1	0	4	0	0				40	2868	124	1+ 1 (fragile)+1 (short telo)+1 very close	0	0		1(single)			1
41	2582	71	0	0	0	0	0	0				41	2310	67	0	0	0	0	0				41	2869	69	0	1	1	0	0			3
42	2583	223	3	0	8	0	1(single)	0				42	2311	70	2 (1fused)	0	0	0	0				42	2870	126	0	0	0	0	0	0		0
43	2584	55	0	0	0	0	0	0				43	2312	85	4 (1 fused)	0	2	0	2 (single)				43	2871	68	0	0	0	0	0	0		0
44	2585	134	0	0	0	0	0	0				44	2313	75	0	0	0	0	0				44	2872	182	0	1 (1 colo-1 empty)	2	0	0	0		0
45	2586	69	0	0	5	2	0	0				45	2314	114	0	0	0	0	0				45	2873	229	0	0	1	0	0	0		0
46	2587	67	1	0	1	0	1(single)	0				46	2316	259	6 (3fused)	0	9	2	2(single)				46	2874	126	0	0	1	0	1 (single)	0		0
47	2588	70	0	0	0	0	0	0				47	2317	259	7 (3fused)	0	11	2	2 (double) + 7(single)				47
48	2589	64	0	0	1	0	0	0				48	2318	129	0	0	5	0	2 (double)+ 2 (single)				48
49	2590	60	1 (2 dots Edu 1 not co-loc)	0	6	1	0	0				49	2321	35	0	0	1	1	1 (double)				49
50	2591	143	2 (2 dots Edu 1 not co-loc)	0	4	4	2(single)+ 3 (double)	1				50	2322	121	0	0	0	0	0	1 (at telo)			50
																								total	4959	41	9	96	49	19 single			41
							24 total						total	5974	55	3	117	50	39							0.0082678				3 double
							14 single and 10 double								0.00920656		29	8	single 29
		n. chromosome	co-loc telo-with EdU single	co-loc telo-with EdU double	internal single EdU	internal double EdU													double 8
		5126	27	3	118	24								n. chromosome	co-loc telo-with EdU single	co-loc telo-with EdU double	internal single EdU	internal double EdU	2 not known					n. chromosome	co-loc telo-with EdU single	co-loc telo-with EdU double	internal single EdU	internal double EdU
			0.00526726		14	10								5974	55	3	146	58						4959	41	9	96	49
					132	34
		telo	30	0.00585252										non -telo	204	0.034148
		non -telo	166	0.0323839										telo	58	0.00970874								non -telo	145	0.0292398
																								telo	50	0.0100827
			GFP	CRE	second experiment									Figure 4F
		Mitotic DNA synthesis (Non-telomeric)	0.0323839	0.034148	0.0292											Single Chromatid	Both Chromatids
		Telomeric mitotic DNA synthesis	0.00585252	0.00970874	0.0101									Mitotic DNA synthesis (Non-telomeric)		0.715686	0.284314
														Telomeric mitotic DNA synthesis		0.948276	0.0517241
	calculation Figure 3D
			GFP	CRE	CRE second experiment
		Mitotic DNA synthesis (Non-telomeric)	1	1.05447	0.901682
		Telomeric mitotic DNA synthesis	1	1.6589	1.72575
