# Supplementary material for: TRF1 averts chromatin remodelling, recombination and replication dependent-break induced replication at mouse telomeres
Source: eLife. 2020 Jan 14;9:e49817. doi: 10.7554/eLife.49817 (PMC6986873; doi:10.7554/eLife.49817)
Supplement: Figure 6—figure supplement 1—source data 1. — Related to Figure 6—figure supplement 1A. [file elife-49817-fig6-figsupp1-data1.xlsx]

## Sheet: Figure 6S1A
population doublings
Days	GAPDH + GFP	GAPDH + CRE	Smc5 + GFP	Smc5 + CRE	PolD3 + GFP	PolD3 + CRE
0	0	0	0	0	0	0
1
2
3	1.5	1.6	2.8	2.6	1.8	1.6
4
5
6	4.5	3.2	5.5	4.6	4.1	3.3
