# Supplementary material for: TRF1 averts chromatin remodelling, recombination and replication dependent-break induced replication at mouse telomeres
Source: eLife. 2020 Jan 14;9:e49817. doi: 10.7554/eLife.49817 (PMC6986873; doi:10.7554/eLife.49817)
Supplement: Figure 6—figure supplement 1—source data 2. — Related to Figure 6—figure supplement 1VB. [file elife-49817-fig6-figsupp1-data2.xlsx]

## Sheet: Figure 6S1B
	S-Phase (EdU positive)	Non S-Phase (EdU negative)
GAPDH + GFP	63	37
GAPDH + Cre	67	33
Smc5 + GFP	42	58
Smc5 + Cre	49	51
PolD3 + GFP	23	77
PolD3 + Cre	31	69
