# Supplementary material for: TRF1 averts chromatin remodelling, recombination and replication dependent-break induced replication at mouse telomeres
Source: eLife. 2020 Jan 14;9:e49817. doi: 10.7554/eLife.49817 (PMC6986873; doi:10.7554/eLife.49817)
Supplement: Figure 6—figure supplement 2—source data 1. — Related to Figure 6—figure supplement 2C. [file elife-49817-fig6-figsupp2-data1.xlsx]

## Sheet: Figure 6S2C
frequency telomere fragility/chromosome
shGAPDH+GFP	shGAPDH+GFP	shGAPDH+GFP	shGAPDH+CRE	shGAPDH+CRE	shGAPDH+CRE	shSMC5+GFP	shSMC5+GFP	shSMC5+GFP	shSMC5+CRE	shSMC5+CRE	shSMC5+CRE	shPolD3 + GFP	shPolD3 + CRE
2.7	1.9	2.8	39	6.9	21.7	11.9	5	0	33.6	23.6	28	2.6	28.1
2.6	2.4	4	44.6	7.4	21.4	2.5	2	4.7	27.9	12.5	16.9	5.5	5.4
7.4	1.9	2.1	33.6	17.2	17.3	7.2	4.2	2.3	24.3	15.5	17.4	2.6	13.9
13.9	1.4	0	47.3	9.1	7	31.3	5	2.5	16.4	26.3	28.6	2.6	3.8
9.4	1.8	1.6	45.1	7.1	6.2	3	9.5	0	47.1	20.7	37.2	1.3	39.1
8.6	3.5	5.2	37.5	11.2	16.2	6	0	7.3	25.8	10.3	11.9	4.1	32.4
9.2	0	4.3	30.3	16.1	13.6	3.1	7.4	4.1	35	11.2	11.3	0	12.8
7.1	4.3	3.9	44.1	8.6	7.6	0	2	3.2	29.7	17.9	15.9	3.9	4.1
2.9	2.4	0	27.7	10.6	21	7.6	1.5	0.8	19.9	24.1	16.3	2.8	3.2
8.2	1.4	5.5	26.7	11.8	11.2	8.1	2.1	2.4	33.3	20.3	13.9	0	30
14.5	11.2	2.9	37.9	9	20	1.6	5.6	1.5	35.9	8.8	8.3	2.8	1.4
5.7	4.1	1.3	29.2	8	15.4	16.7	1.7	0	24.8	20.8	15	5.2	20.9
1.5	1.8	5.7	40	8.1	13	13.8	1.9	6.3	18.5	13.7	14.7	3.9	30.2
1.8	0.9	4	34.6	19.8	18.6	3.4	1.2	3.4	36.7	16.7	21.1	6.6	14
7.9	1.2	1.8	34.7	6.3	9.7	1.4	1.1	6.6	32.8	10.2	14.9	0	34
5.2	2.9	0	25.7	6.5	19.5	11.1	0.4	6.8	20.8	1	40	1.3	19.9
4.6	3.5	2.5	31.1	13.6	10.6	10.3	2.5	2.3	16.1	17.1	26.8	1.5	24.4
10.8	0.5	4.7	22.2	11.9	25.6	8	1.8	3.1	26	6.5	15	5.7	0
1.5		3.8	43.7	19.8	14.9	6.7		1	45.1		13.2	1.3	14.6
3.6		1.5	50		14.3	2.7		0	43.3		21.6	1.4	1.8
0		8.3	34.1		17.4	7.5		1	17.2		20.5	4.2	38.2
6		4.5	22.5		14.1	5.7		1.7	27.9		37.3	12.3	26.7
4.6		7.1	16.3		24.1	6.1		2.5	28.2		22.5	1.4	32.3
10.7		7	26.5		21.2	5.9		3.2	30		17.8	0	19.1
1.5		1	21.3		20	17.5		5.9	26.5		27.6	2.7	8.5
3.3		4.5			37.2	4.8		5.6	24		5	4	24.6
4.1		4.3			22.5	2.1		0	25.7		20.3	9.7	20
		1.8			13.4			0.8			17.8	6.7	35.3
		2.3			24.4			0.9			27.9	7	23.6
		4.3			15.9			4.8			42.1	2.8	6.3
		2.9			22.6			8.3			26.5	0.7	18.6
		4.3			15.1			3.3			30.8	1.4	38.2
		1.4			22.4			14.5			27.3	2.7	17.6
		4.3			11.3			14.2			10.1	2	1.8
		1.8			9.2			2.1			19.6	1.4	41
		5.6			15.7			0			15.6	2.7	32.7
		2.1			14.2			1.1			14.7	1.4	37.1
		4.7			23.7			0.7			19.4	2.8	22.5
		0			42.9			1.1			24.5	0	5
		0			6.1			3.3			12.7	3	26.3
		5.6			25.4			2.4			5	5.2	43.7
		5.4			22.9			0.8			9.6	5.2	25
		3.6			22.4			7.2			17.4	1.3	27.4
		2.2			14.7			3.9			16.3	5.3	52.7
		2.9			6.1			0			26.8	1.9	18.4
		1.5			17.8			10.4			11.5	2.7	22.2
		2.8			14.7			0.8			15.4	13.9	24.1
		3.2			26.7			1.7			9.6	1.4	44.4
		1.7			20			0.7			56.3	1.4	23.3
		0.7			16.5			0.8			33.3	1.5	20.5
