# Supplementary material for: TRF1 averts chromatin remodelling, recombination and replication dependent-break induced replication at mouse telomeres
Source: eLife. 2020 Jan 14;9:e49817. doi: 10.7554/eLife.49817 (PMC6986873; doi:10.7554/eLife.49817)
Supplement: Figure 6—source data 1. — Related to Figure 6A and B. [file elife-49817-fig6-data1.xlsx]

## Sheet: Figure 6A-6B
		Figure 5A
									Figure 5B
									quantification protein signal
										shGAPDH + GFP	shGAPDH + GFP	shGAPDH + CRE	shGAPDH + CRE	shSMC5 + GFP	shSMC5 + GFP	shSMC5 + CRE	shSMC5 + CRE
									Smc5	1	1	1.06	0.81	0.02	0.21	0.01	0.04
									Trf1	1	1	0	0.01	1.24	1.11	0	0.05
