# Supplementary material for: TRF1 averts chromatin remodelling, recombination and replication dependent-break induced replication at mouse telomeres
Source: eLife. 2020 Jan 14;9:e49817. doi: 10.7554/eLife.49817 (PMC6986873; doi:10.7554/eLife.49817)
Supplement: Figure 6—source data 2. — Related to Figure 6C. [file elife-49817-fig6-data2.xlsx]

## Sheet: Figure 6C_
	quantification POLD3 mRNA levels relative to shGAPDH control
	shGAPDH control	shGAPDH control	shSMC5 + GFP	shSMC5 + GFP	shSMC5 + CRE	shSMC5 + CRE	shPolD3 + GFP	shPolD3 + GFP	shPolD3 + CRE	shPolD3 + CRE
	1	1	0.98	0.99	0.99	0.83	0.39	0.52	0.48	0.55
