# Supplementary material for: TRF1 averts chromatin remodelling, recombination and replication dependent-break induced replication at mouse telomeres
Source: eLife. 2020 Jan 14;9:e49817. doi: 10.7554/eLife.49817 (PMC6986873; doi:10.7554/eLife.49817)
Supplement: Figure 6—source data 3. — Related to Figure 6D and E. [file elife-49817-fig6-data3.xlsx]

## Sheet: Figure 6E_
N. of EdU+ telomeres/metaphase
GAPDH + GFP	GAPDH + GFP	GAPDH + Cre	GAPDH + Cre	Smc5 + GFP	Smc5 + Cre	Smc5 + Cre	PolD3 + GFP	PolD3 + GFP	PolD3 + Cre	PolD3 + Cre
0	0	1	0	0	0	5	0	0	0	0
5	0	0	2	2	2	2	0	0	0	2
1	0	0	1	1	1	3	0	0	0	0
1	0	0	0	1	0	2	0	0	0	1
0	0	0	0	0	0	2	0	0	0	0
0	1	1	1	0	3	2	0	1	0	0
0	0	1	1	1	0	1	0	0	1	0
1	0	2	0	0	0	0	0	0	1	2
2	0	0	0	0	5	1	0	2	0	1
0	1	0	3	1	1	1	0	0	0	1
0	0	0	0	2	0	4	0	1	0	0
0	0	0	1	0	0	0	0	1	0	0
1	0	0	1	0	0	1	0	0	2	1
0	1	1	6	0	3	1	0	0	0	0
1	0	1	0	0	8	2	0	0	0	0
0	0	0	2	3	0	8	0	0	2	0
1	0	0	0	0	0	1	0	0	0	0
0	0	0	2	2	1	0	0	0	0	1
0	1	4	2	0	3	7	1	0	0	2
0	0	4	0	0	0	0	0	1	1	0
0	0	2	1	0	4	0	1	0	1	1
1	3	0	0	0	0	0	0	0	0	2
0	0	0	1	0	3	0	1	1	0	0
1	0	0	2	1	2	2	1	0	0	1
0	2	0	0	0	2	0	1	0	0	1
1	0	0	0	0	1	2	1	0	1	0
0	0	0	3	0	3	2	0	0	0	0
1	1	0	4	2	1	2	0	0	0	1
0	1	0	1	2	0	1	0	0	0	0
0	1	0	0	1	5	2	1	0	1	0
0	0	2	0	2	1	0	0	1	3	1
0	0	1	1	0	0	1	2	0	0	1
1	0	2	1	0	2	0	0	0	2	1
0	1	5	0	3	5	0	0	1	0	1
2	1	0	0	0	0	0	0	0	0	0
0	0	2	0	0	3	0	2	0	1	0
0	1	2	0	0	0	0	0	0	0	1
0	1	3	2	1	9	1	1	1	0	0
0	3	1	1	2	5	0	0	1	2	1
0	0	1	4	0	3	1	0	0	1	0
0	0	0	0	0	3		0	0	0	0
3	0	2	0	1	1		0	0	1	1
0	1	4	0	1	1		0	1	0	1
0	0	0	0	0	1		0	0	0	2
0	0	0	0	0	0		1	0	0	1
1	2	6	0	0	1		0	0	0	1
0	0	7		0	0		0	0	0	0
0	0	0		1	0		0	0	0	0
1	0	0		0	1		1	0	0
2	0	0			2		0	0	1
	0								0
	0								0
	1								1
									0
									0
									0
									1
									0
									0
