# Supplementary material for: TRF1 averts chromatin remodelling, recombination and replication dependent-break induced replication at mouse telomeres
Source: eLife. 2020 Jan 14;9:e49817. doi: 10.7554/eLife.49817 (PMC6986873; doi:10.7554/eLife.49817)
Supplement: Figure 7—figure supplement 1—source data 1. — Related to Figure 7—figure supplement 1A. Accession code for the proteomic data will be made available before publication on public repository PRIDE. [file elife-49817-fig7-figsupp1-data1.xlsx]

## Sheet: Figure 7S1
double exchange								single exchange
GAPDH+GFP	GAPDH+CRE	Smc5 AF+GFP	Smc5 AF+CRE	Pold3+CRE				GAPDH+GFP	GAPDH+CRE	Smc5 AF+GFP	Smc5 AF+CRE	Pold3+CRE
0	0	0	0	0				1.6	4.7	0	2	0
0	1.5	0	0	0				0	2.9	0.5	0	3
0	0	0	0.4	0				1.3	1.7	0.5	1.1	3
0	0	0.6	0	0				0.9	0.7	0	0.8	0
0	2.7	0.3	1.3	0				0	0.7	0.3	3.4	0
0	3.5	0	1.3	0				0	1.8	0	1.3	2.3
0	1.2	0	0	0				0	0	0	0	1.6
0	2	0	0.5	0				0	0	0	1.8	2.2
0	11.1	0	1.5	0				0	7.4	0	0	1.3
0	2.5	0	0	0				0	3.8	0.9	0	1.7
0	0	0.6	0.8	2.7				0	0	0	0	1.4
0	1.1	0	0	0				0.4	1.1	0	0	0
0	0	0	0.8	0				0	0.8	0	2.3	0
0	0	0	0	0.7				0	1.7	0	0	0.7
0	0	0	0	0				0	1.5	0	0	1
0	5	0	0	0				0	0	0	0	0
0	0	1	1	0				0	3.2	0	0	1.5
0	0.6	1	0.5	0				0	0	0.5	0.5	0
0	5.6	0	0.8	0				0	1.1	0	0	2.2
0	2.2	0	0	0				0	0.7	0	0	1.3
0	0	0	0	0				0	3.3	0	0	0
0	1.7	0	1.3	0				0	3.3	0	0	0
0	5.4	0	0	0				0	0	0	0.6	2.6
0.6	1.9	0	2.2	0				0	3.7	1.3	0.6	0
0	0.9	0.6	2.1	1.3				0	0	0	0.7	0
0	1.8	0.8	0	0				0	0	0.8	0	0
0	0	0	0	1.3				0	10.4	0	0	0
0	3.6	0	0	0				1	0	0	0.6	1.8
0.7	0	0	0	0				0.7	1.6	0	1.2	1.9
0	2.9	0	0	0				0	1.7	0	1.2	1.8
				1.6								2.4
				1.1								1.1
				0								1.2
				0								1.8
				0								0
				0								0
