# Supplementary material for: TRF1 averts chromatin remodelling, recombination and replication dependent-break induced replication at mouse telomeres
Source: eLife. 2020 Jan 14;9:e49817. doi: 10.7554/eLife.49817 (PMC6986873; doi:10.7554/eLife.49817)
Supplement: Figure 7—source data 1. — Related to Figure 7A. [file elife-49817-fig7-data1.xlsx]

## Sheet: Figure 7A
n. colocalising PML-telomere foci/total PML
GAPDH+GFP	GAPDH+CRE	Smc5+GFP	Smc5+CRE	pold3 +gfp	Pold3+CRE
0	0.2	0.21	0	0.35	0
0	0.0666667	0	0.33	0.09	0.11
0	0.357143	0.32	0.18	0.16	0.08
0	0.4375	1	0.25	0.08	0.18
0	0.368421	0.25	0	0	0.33
0.333333	0.333333	0.17	0	0.33	0.75
0.111111	0.206897	0	0.2	0.43	0
0.153846	0.333333	0.17	0	0.1	0.11
0.0555556	0.178571	0.17	0.25	0.14	0.47
0	0.125	0.13	0.36	0.25	0.05
0.1	0.181818	0.12	0.29	0.33	0.25
0.0588235	0.5	0.11	0.31	0.19	0.26
0.105263	0.307692	0.1	0	0.06	0.25
0.133333	0.4	0.07	0	0	0.18
0.0434783	0	0	0.14	0.31	0.25
0	0	0.17	0.27	0.07	0.25
0	0.5	0	0.09	0.07	0.42
0	0	0	0.22	0.29	0.11
0.0909091	0.333333	0.2	0.08	0.6	0
0	0.142857	0.25	0.23	0.33	0.22
0	0.181818	0.23	0.17	0.27	0
0	0.285714	0	0.31	0.5	0.11
0	0.2	0.13	0.44	0.17	0
0	1	0	0.21	0	0.22
0.333333	0.0294118	0	0.09	0	0.17
0	0.28	0.4	0.24	0.19	0
0.125	0.666667	0	0.19	0.17	0.11
0.1	0.15	0.14	0.06	0	0.06
0.0588235	0.6	0	0.3	0.11	0.21
0.0833333	0.333333	0.13	0.18	0.17	0
0.133333	1	0.18	0.1	0	0
0.0714286	0.133333	0.33	0.29	0.2	0.19
0.0526316	0.176471	0.17	0.27	0.17	0.14
0.0909091	0.2	0.22	0.4	0.13	0.26
0.25	0.166667	0.13	0	0.22	0.53
0.222222	0.133333	0.17	0	0	0.24
0	0	0	0.25	0	0.31
0.210526	0.166667	0	0.16	0.23	0.27
0.111111	0.125	0.1	0	0.17	0.5
0.2	0.25	0.15	0.3	0	0.33
0.25	0.181818	0	0.19	0.33	0
0.214286	0.285714	0.11	0.29	0.5	0.29
0.375	1	0.14	0.2	0.26	0.25
0	0	0.1	0	0.12	0.13
0	0.333333	0.5	0.5	0.11	0.2
0	0.5	0	0	0.25	0.29
0.3125	0	0.19	0.13	0.09	0.25
0.222222	0	0.2	0.17	0.07	0.09
0	0.375	0.2	0.08	0	0.33
0.142857	0	0.38	0.12	0.18	0
0.1875	0.142857	0	0.29	0.14	0
0.0666667	0.0769231	0	0.11	0.07	0
0.176471	0.157895	0.07	0.14	0	0.11
0.0714286	0.5	0.17	0.05	0	0.04
0.304348	0.428571	0.08	0	0.22	0.2
0.105263	0.333333	0.13	0.25	0	0.13
0.133333	0.0666667	0	0.14	0	0
0.333333	0	0.08	0.16	0	0
0.263158	0.166667	0.25	0.17	0.14	0.07
0.05	0.277778	0.14	0.13	0.07	0.19
0	0.176471	0	0.06	0.2	0.13
0.181818	1	0.11	0.22	0.25	0
0.25	0.142857	0.25	0	0.3	0.13
0	0.28	0.43	0.09	0	0.05
0.666667	0	0.1	0	0.38	0.12
0	0	0.33	0	0.5	0.09
0	0.333333	0.18	0.18	0.2	0.09
0	0.363636	0	0	0.07	0
0.142857	0.191489	0	0.08	0.27	0.06
0.230769	0	0	0.15	0.17	0.13
0.0588235	0.166667	0.09	0	0.22	0
0.04	0	0.06	0	0	0.04
0.0384615	0.2	0.5	0.13	0.33	0.13
0.225806	0.545455	0.04	0.08	0.25	0.13
0.0909091	0.6	0.15	0.04	0.29	0.13
0.333333	0	0.08	0	0.5	0.2
0.666667	0.261905	0.29	0	0.44	0.25
0.25	0.5	0.17	0.1	0	0.12
0.142857	0.307692	0.14	0.2	0.07	0.07
0.4	0	0.21	0.04	0.17	0.14
0.125	0.5	0.21	0.11	0	0.21
0	1	0.07	0	0.15	0.13
0	0	0.07	0.2	0.25	0
0	0.176471	0.14	0.11	0	0.17
0.0909091	0	0.21	0.14	0.5	0.33
0.0909091	0.333333	0	0.19	0.33	0.08
0.0588235	0	0	0.25	0.14	0
0.1875	0	0.29	0.08	0	0.25
0	0	0.29	0.07	0	0.09
0.142857	0.125	0.17	0.25	0	0.08
0.375	0.0833333	0	0	0.22	0.1
0	0.428571	0.1	0.27	0	0.13
0.1	0.0555556	0	0.17	0	0.09
0	0	0	0.2	0.2	0.17
0	0.2	0.14	0.05	0.13	0.09
0.0833333	0.142857	0.06	0.26	0.17	0.07
0.1	0.294118	0	0.1	0.33	0.33
0	0.333333	0.08	0.04	0.2	0.19
0.142857	0.1	0	0.04	0.16	0.21
0.1	0.166667	0.11	0.05	0	0
0.285714	0.0769231	0.08	0.13	0	0.13
0.0454545	0.142857	0	0.18	0	0.17
0.1	0.230769	0	0.16	0	0.1
0.111111	0.4	0	0.2	0.43	0.17
0.0833333	0.333333	0.16	0.18	0.15	0.43
0.142857	0.111111	0.17	0.04	0	0.08
0	0.375	0.17	0.21	0	0.18
1	0.285714	0.15	0.07	0	0
0.5	0	0.15	0.06	0.1	0.06
0.0625	0.5	0.11	0.06	0	0.1
0.125	0	0.09	0.07	0	0.13
0.25	0.666667	0.07	0	0.1	0.15
0.2	0.3	0	0.07	0.29	0.33
0.125	0.2	0.12	0	0.17	0.18
0	0.181818	0	0	0.33	0.23
0.0833333	0.166667	0.11	0	0.13	0.06
0	0	0.08	0.15	0	0
0.1	0	0.21	0.16	0.19	0
0.166667	0.1	0.05	0	0.17	0
0	0	0.33	0.06	0.08	0
0.142857	0.125	0.15	0	0	0.17
0.142857	0.307692	0	0	0.19	0.09
0.166667	0.25	0	0	0.11	0.14
0.142857	0	0.09	0.2	0	0.29
0.105263	0	0	0.25	0.19	0.22
0.333333	0.142857	0.25	0	0.06	0.12
0	0.666667	0.14	0.12	0	0.14
0	0.0909091	0.2	0.15	0.29	0.13
0	0.1	0.33	0	0.38	0.4
0	0.192982	0.17	0	0.15	0.11
0.5	0.209877	0.2	0.12	0	0.17
0.25	0.333333	1	0.2	0	0.18
0	0.2	0.25	0.06	0.14	0.17
0	0.214286	0.1	0	0.11	0.17
0	0.166667	0	0	0.08	0.14
0.2	0.25	0.19	0	0.15	0
0	0.181818	0.6	0.25	0.23	0.1
0	0.25	0	0.5	0.17	0.22
0	0.166667	0.23	0.6	0.09	0
0	0.16	0.25	0.08	0.2	0
0	0.153846	0.13	0	0.17	0.2
0.111111	0.176471	0.25	0	0.33	0
0	0	0	0.05	0	0
0	0.181818	0	0.07	0.33	0.5
0.1	0.5	0.05	0	0	0
0.4	0.25	0.25	0	0.25	0
0	0	0	0	0.09	0.33
0	0.0416667	0	0	0.42	0
0	0.25	0.08	0.1	0.2	0
0	0.266667	0.08	0.05	0.08	0
0	0.25	0.07	0	0.27	0.33
0	0.363636	0.17	0.06	0	0
0	0.315789	0	0.08	0.1	0.5
0	0.166667	0.08	0.08	0.18	0
0	0.384615	0.23	0	0.17	0.09
0.1	0.4	0.19	0.22	0.05	0.25
0.0769231	0.266667	0.15	0	0.06	0
0.047619	0.5	0	0.17	0.14	0.33
0	0	0.05	0.14	0.31	0.33
0	0.285714	0.2	0.08	0	0
0	0.222222	0.07	0	0.13	0.14
0	0.2	0.04	0	0.14	0.29
0	0.153846	0	0	0.25	0.33
0	0.125	0	0	0.21	0.22
0	0.4	0	0	0	0.25
0.0882353	0.222222	0.09	0	0.07	0
0.0612245	0.3	0	0	0.09	1
0	0.1	0	0.1	0.1	0
0	0	0	0.31	0.12	0
0.142857	0.428571	0.08	0.12	0	0
0.1	0.454545	0.1	0	0.08	0.14
0	0.222222	0.11	0	0.22	0
0	0	0.05	0.22	0	0
0.1	0	0.1	0.2	0.33	0
0	0.333333	0.14	0.1	0	0
0	0.333333	0	0.2	0.33	0.17
0	0.0833333	0.14	0	0.26	0.13
0	0.416667	0	0.08	0.08	0
0	0.125	0.25	0.14	0.07	0.14
0	0.454545	0.29	0.14	0.33	0
0	0.255319	0.25	0.25	0	0.09
0	0.0869565	0.25	0.13	0	0
0	0	0.17	0	0.17	0
0	0.153846	0.22	0.07	0	0.18
0	0.333333	0.06	0.13	0.13	0
0	0	0	0.33	0.17	0.14
0	0.5	0.14	0.18	0	0.07
0	0.08	0	0.17	0.22
0	0.272727	0	0	0.09
0	0.1875	0	0	0.23
0	0.333333	0	0.29	0
0.0833333	0.285714	0	0.05	0
0.375	0	0.33	0.08	0.22
0	0.75	0	0.15	0.13
0.333333	0.428571	0	0	0
0.166667	0	0	0.14	0.08
0	0.3125	0.13	0.15	0
0	0.272727	0.05	0	0.15
0.25	0.357143	0.05	0.29	0
0.25	0	0.09	0	0.22
0	0	0.14	0.25	0.17
0.153846	0.0833333	0	0	0.5
0	0.0714286	0	0.17	0.25
0	0.0833333	0.2	0.06	0.2
0	0	0.08	0	0
0	0.0757576	0	0.07	0
0	0.25	0.13	0	0
0	0.2	0	0.13	0.5
0	0.5	0.11	0.06	0.33
0	0.5	0	0.08	0
0	0	0	0	0
0.142857	0.25	0.08	0.07	0.1
0.2	0.2	0	0	0.67
0.0588235	0	0.15	0.26	0
0.0555556	0	0.18	0.26	0.08
0.1875	0	0.09	0.06	0.06
0.222222	0.125	0	0.08	0.06
0.2	0.16		0.11	0.25
0.25	0		0.21	0
0.105263	0		0.07	0.05
0	0.257143		0.21	0.13
0.25	0.142857		0	0.08
0.166667	0.25		0.33	0.17
0	0.25		0	0.08
0	0.285714		0.14	0.08
0	0.3		0.33	0
0	0.272727		0	0.09
0	0.5		0	0.14
0	0		0.18	0.08
0	0.571429		0.2	0
0	0.133333		0.11	0.13
0.25	0.375		0.22	0
0	0.333333		0.25	0
0	0.0909091		0.14	0
0	0.375		0.22	0
0	0.222222			0
0	0			0
0	0.222222			0.15
0	0			0.14
0.2	0			0.06
0	0			0.13
0.0833333	0.15			0
0	0.333333			0.25
0.333333	0.6			0.13
0.5	0.25			0
0.5	0.5			0.24
0	0			0.18
0	0.375			0.29
0	0.444444			0.08
0	0.416667			0.22
0	0.375			0
0	0.166667			0.25
0	0.375			0.13
0	0.434783			0.06
0	0			0.18
0	0.125			0.09
0	0.625			0.09
0	0			0.25
0.125	0.5
0.5	0
1	0
0	0.411765
0	0.25
0.333333	0.153846
1	0.5
1	0.307692
0	0.333333
0.333333	0.4
0	0.25
0	0.384615
0.333333	0.571429
0.25	0.5
0	0.416667
0	0.257143
0.125	0.333333
0	0.375
0	0.333333
0.25	0.166667
0.125	0
0.1	0
0.272727	0.5
0.166667	0.111111
0.166667	0.166667
0	0.285714
0.272727	0.0909091
0	0
0.333333	0.333333
0.333333	0.2
0.125	0.454545
0	0
0	0.166667
0	0.0909091
0	0.153846
0.333333	0.0769231
0.285714	0.5
0	0.222222
0	0.25
0	0.0714286
0	0.333333
0.333333	0.333333
0	0.666667
