# Supplementary material for: TRF1 averts chromatin remodelling, recombination and replication dependent-break induced replication at mouse telomeres
Source: eLife. 2020 Jan 14;9:e49817. doi: 10.7554/eLife.49817 (PMC6986873; doi:10.7554/eLife.49817)
Supplement: Figure 7—source data 2. — Related to Figure 7B. [file elife-49817-fig7-data2.xlsx]

## Sheet: Figure 7B_
% T-SCE per chromosome ends
GAPDH+GFP	GAPDH+CRE	Smc5+GFP	Smc5+CRE	Pold3+CRE
1.6	4.7	0	2	0
0	4.4	0.5	0	3
1.3	1.7	0.5	1.4	3
0.9	0.7	0.6	0.8	0
0	3.4	0.6	4.7	0
0	5.3	0	2.5	2.3
0	1.2	0	0	1.6
0	2	0	2.3	2.2
0	18.5	0	1.5	1.3
0	6.3	0.9	0	1.7
0	0	0.6	0.8	4.1
0.4	2.3	0	0	0
0	0.8	0	3.1	0
0	1.7	0	0	1.5
0	1.5	0	0	1
0	5	0	0	0
0	3.2	1	1	1.5
0	0.6	1.5	0.9	0
0	6.8	0	0.8	2.2
0	3	0	0	1.3
0	3.3	0	0	0
0	5	0	1.3	0
0	5.4	0	0.6	2.6
0.6	5.6	1.3	2.8	0
0	0.9	0.6	2.9	1.3
0	1.8	1.6	0	0
0	10.4	0	0	1.3
1	3.6	0	0.6	1.8
1.4	1.6	0	1.2	1.9
0	4.6	0	1.2	1.8
				4
				2.2
				1.2
				1.8
				0
