# Supplementary material for: TRF1 averts chromatin remodelling, recombination and replication dependent-break induced replication at mouse telomeres
Source: eLife. 2020 Jan 14;9:e49817. doi: 10.7554/eLife.49817 (PMC6986873; doi:10.7554/eLife.49817)
Supplement: Figure 7—source data 3. — Related to Figure 7C. [file elife-49817-fig7-data3.xlsx]

## Sheet: Figure 6C-source data 18
							quantification
								GAPDH + GFP	GAPDH + GFP	GAPDH + GFP	GAPDH + GFP	GAPDH + GFP
								1	1	1	1	1
								GAPDH + CRE	GAPDH + CRE	GAPDH + CRE	GAPDH + CRE	GAPDH + CRE
								2.39	2.57	2.45	4.29	2.49
								Smc5 + GFP	Smc5 + GFP	Smc5 + GFP	Smc5 + GFP
								8.71	4.68	4.07	1.71
								Smc5 + CRE	Smc5 + CRE	Smc5 + CRE	Smc5 + CRE
								6.71	3.52	3.84314	1.88
								PolD3 + GFP	PolD3 + GFP	PolD3 + GFP	PolD3 + GFP
								1.56	0.71	0.57	1.47
								PolD3 + CRE	PolD3 + CRE	PolD3 + CRE	PolD3 + CRE
								2.48	0.97	1.53	1.58
								U20S	U20S	U20S
								3.85409	2.03684	2.63399
